# Supplementary material for: A Network Pharmacology Approach to Uncover the Molecular Mechanisms of Herbal Formula Ban-Xia-Xie-Xin-Tang
Source: Evid Based Complement Alternat Med. 2018 Oct 16;2018:4050714. doi: 10.1155/2018/4050714 (PMC6206573; doi:10.1155/2018/4050714)
Supplement: Supplementary Materials — BXXXT compounds and their targets (Table S1). Disease associated genes (Table S2). DrugBank drugs and their targets (Table S3). All representative compounds in BXXXT and their CS values (Table S4). Enrichment analysis for MF ontology (Table S5). Enrichment analysis for BP ontology (Table S6). Enrichment analysis for CC ontology (Table S7). Results of network module analysis (Table S8). The targets of BXXXT herbs (Table S9). [file 4050714.f1.xlsx]

## Sheet: Contents
Electronic Supplementary Tables
A Network Pharmacology Approach to Uncover the Molecular Mechanisms of Herbal Formula Ban-Xia-Xie-Xin-Tang Ming Yang, Jialei Chen, Liwen Xu, Xiufeng Shi, Xin Zhou, Rui An*, and Xinhong Wang*
Contents
Table S1. BXXXT compounds and their targets
Table S2. Disease associated genes
Table S3. DrugBank drugs and their targets
Table S4. All representative compounds in BXXXT and their CS values
Table S5. Enrichment analysis for MF ontology
Table S6. Enrichment analysis for BP ontology
Table S7. Enrichment analysis for CC ontology
Table S8. Results of network module analysis
Table S9. The targets of BXXXT herbs

## Sheet: Table S1
Table S1 BXXXT compounds and their targets
Herb	Chemical	Target	GeneID	Smiles
BX	2-undecanone	TMEM216	51259	CCCCCCCCCC(=O)C
BX	2-undecanone	ACOT13	55856	CCCCCCCCCC(=O)C
BX	3,4-dihydroxybenzaldehyde / protocatechualdehyde/protocatechuicaldehyde/Protocatechuic Aldehyde	ODC1	4953	c1cc(c(cc1C=O)O)O
BX	3,4-dihydroxybenzaldehyde / protocatechualdehyde/protocatechuicaldehyde/Protocatechuic Aldehyde	TYR	7299	c1cc(c(cc1C=O)O)O
BX	3,4-dihydroxybenzaldehyde / protocatechualdehyde/protocatechuicaldehyde/Protocatechuic Aldehyde	AOX1	316	c1cc(c(cc1C=O)O)O
BX	beta-sitosterol-3-O-beta-D-glucopyranoside / daucosterol / strumaroside / daucosterin/alexandrin	GSK3B	2932	CC[C@H](CC[C@@H](C)[C@H]1CC[C@@H]2[C@@]1(CC[C@H]3[C@H]2CC=C4[C@@]3(CC[C@@H](C4)O[C@H]5[C@@H]([C@H]([C@@H]([C@H](O5)CO)O)O)O)C)C)C(C)C
BX	beta-sitosterol-3-O-beta-D-glucopyranoside / daucosterol / strumaroside / daucosterin/alexandrin	POLB	5423	CC[C@H](CC[C@@H](C)[C@H]1CC[C@@H]2[C@@]1(CC[C@H]3[C@H]2CC=C4[C@@]3(CC[C@@H](C4)O[C@H]5[C@@H]([C@H]([C@@H]([C@H](O5)CO)O)O)O)C)C)C(C)C
BX	beta-sitosterol-3-O-beta-D-glucopyranoside / daucosterol / strumaroside / daucosterin/alexandrin	ABCG5	64240	CC[C@H](CC[C@@H](C)[C@H]1CC[C@@H]2[C@@]1(CC[C@H]3[C@H]2CC=C4[C@@]3(CC[C@@H](C4)O[C@H]5[C@@H]([C@H]([C@@H]([C@H](O5)CO)O)O)O)C)C)C(C)C
BX	beta-sitosterol-3-O-beta-D-glucopyranoside / daucosterol / strumaroside / daucosterin/alexandrin	ABCG8	64241	CC[C@H](CC[C@@H](C)[C@H]1CC[C@@H]2[C@@]1(CC[C@H]3[C@H]2CC=C4[C@@]3(CC[C@@H](C4)O[C@H]5[C@@H]([C@H]([C@@H]([C@H](O5)CO)O)O)O)C)C)C(C)C
BX	anethole	IL2	3558	C/C=C/c1ccc(cc1)OC
BX	anethole	JUN	3725	C/C=C/c1ccc(cc1)OC
BX	anethole	NFKBIA	4792	C/C=C/c1ccc(cc1)OC
BX	anethole	PLAU	5328	C/C=C/c1ccc(cc1)OC
BX	anethole	RELA	5970	C/C=C/c1ccc(cc1)OC
BX	anethole	TNF	7124	C/C=C/c1ccc(cc1)OC
BX	anethole	PHLPP1	23239	C/C=C/c1ccc(cc1)OC
BX	baicalein	ACHE	43	c1ccc(cc1)c2cc(=O)c3c(o2)cc(c(c3O)O)O
BX	baicalein	AHR	196	c1ccc(cc1)c2cc(=O)c3c(o2)cc(c(c3O)O)O
BX	baicalein	AKT1	207	c1ccc(cc1)c2cc(=O)c3c(o2)cc(c(c3O)O)O
BX	baicalein	ALB	213	c1ccc(cc1)c2cc(=O)c3c(o2)cc(c(c3O)O)O
BX	baicalein	ALOX12	239	c1ccc(cc1)c2cc(=O)c3c(o2)cc(c(c3O)O)O
BX	baicalein	ALOX12	239	c1ccc(cc1)c2cc(=O)c3c(o2)cc(c(c3O)O)O
BX	baicalein	ALOX12	239	c1ccc(cc1)c2cc(=O)c3c(o2)cc(c(c3O)O)O
BX	baicalein	ALOX12	239	c1ccc(cc1)c2cc(=O)c3c(o2)cc(c(c3O)O)O
BX	baicalein	ALOX5	240	c1ccc(cc1)c2cc(=O)c3c(o2)cc(c(c3O)O)O
BX	baicalein	ALOX5	240	c1ccc(cc1)c2cc(=O)c3c(o2)cc(c(c3O)O)O
BX	baicalein	ALOX15	246	c1ccc(cc1)c2cc(=O)c3c(o2)cc(c(c3O)O)O
BX	baicalein	ALOX15	246	c1ccc(cc1)c2cc(=O)c3c(o2)cc(c(c3O)O)O
BX	baicalein	ALOX15B	247	c1ccc(cc1)c2cc(=O)c3c(o2)cc(c(c3O)O)O
BX	baicalein	APOD	347	c1ccc(cc1)c2cc(=O)c3c(o2)cc(c(c3O)O)O
BX	baicalein	BAX	581	c1ccc(cc1)c2cc(=O)c3c(o2)cc(c(c3O)O)O
BX	baicalein	BAX	581	c1ccc(cc1)c2cc(=O)c3c(o2)cc(c(c3O)O)O
BX	baicalein	CCND1	595	c1ccc(cc1)c2cc(=O)c3c(o2)cc(c(c3O)O)O
BX	baicalein	BCL2	596	c1ccc(cc1)c2cc(=O)c3c(o2)cc(c(c3O)O)O
BX	baicalein	CASP3	836	c1ccc(cc1)c2cc(=O)c3c(o2)cc(c(c3O)O)O
BX	baicalein	CCNB1	891	c1ccc(cc1)c2cc(=O)c3c(o2)cc(c(c3O)O)O
BX	baicalein	CDK1	983	c1ccc(cc1)c2cc(=O)c3c(o2)cc(c(c3O)O)O
BX	baicalein	CDK1	983	c1ccc(cc1)c2cc(=O)c3c(o2)cc(c(c3O)O)O
BX	baicalein	CDK1	983	c1ccc(cc1)c2cc(=O)c3c(o2)cc(c(c3O)O)O
BX	baicalein	CREB1	1385	c1ccc(cc1)c2cc(=O)c3c(o2)cc(c(c3O)O)O
BX	baicalein	CYP1A1	1543	c1ccc(cc1)c2cc(=O)c3c(o2)cc(c(c3O)O)O
BX	baicalein	CYP1A1	1543	c1ccc(cc1)c2cc(=O)c3c(o2)cc(c(c3O)O)O
BX	baicalein	CYP1A1	1543	c1ccc(cc1)c2cc(=O)c3c(o2)cc(c(c3O)O)O
BX	baicalein	CYP1B1	1545	c1ccc(cc1)c2cc(=O)c3c(o2)cc(c(c3O)O)O
BX	baicalein	CYP1B1	1545	c1ccc(cc1)c2cc(=O)c3c(o2)cc(c(c3O)O)O
BX	baicalein	CYP2C19	1557	c1ccc(cc1)c2cc(=O)c3c(o2)cc(c(c3O)O)O
BX	baicalein	CYP2C9	1559	c1ccc(cc1)c2cc(=O)c3c(o2)cc(c(c3O)O)O
BX	baicalein	CYP2D6	1565	c1ccc(cc1)c2cc(=O)c3c(o2)cc(c(c3O)O)O
BX	baicalein	CYP3A4	1576	c1ccc(cc1)c2cc(=O)c3c(o2)cc(c(c3O)O)O
BX	baicalein	CYP3A4	1576	c1ccc(cc1)c2cc(=O)c3c(o2)cc(c(c3O)O)O
BX	baicalein	DPP4	1803	c1ccc(cc1)c2cc(=O)c3c(o2)cc(c(c3O)O)O
BX	baicalein	DYRK1A	1859	c1ccc(cc1)c2cc(=O)c3c(o2)cc(c(c3O)O)O
BX	baicalein	ESR1	2099	c1ccc(cc1)c2cc(=O)c3c(o2)cc(c(c3O)O)O
BX	baicalein	FABP5	2171	c1ccc(cc1)c2cc(=O)c3c(o2)cc(c(c3O)O)O
BX	baicalein	FLT3	2322	c1ccc(cc1)c2cc(=O)c3c(o2)cc(c(c3O)O)O
BX	baicalein	FOS	2353	c1ccc(cc1)c2cc(=O)c3c(o2)cc(c(c3O)O)O
BX	baicalein	FOSL2	2355	c1ccc(cc1)c2cc(=O)c3c(o2)cc(c(c3O)O)O
BX	baicalein	GAA	2548	c1ccc(cc1)c2cc(=O)c3c(o2)cc(c(c3O)O)O
BX	baicalein	GABRA1	2554	c1ccc(cc1)c2cc(=O)c3c(o2)cc(c(c3O)O)O
BX	baicalein	GABRA2	2555	c1ccc(cc1)c2cc(=O)c3c(o2)cc(c(c3O)O)O
BX	baicalein	GABRA3	2556	c1ccc(cc1)c2cc(=O)c3c(o2)cc(c(c3O)O)O
BX	baicalein	GABRA4	2557	c1ccc(cc1)c2cc(=O)c3c(o2)cc(c(c3O)O)O
BX	baicalein	GABRA5	2558	c1ccc(cc1)c2cc(=O)c3c(o2)cc(c(c3O)O)O
BX	baicalein	GABRA6	2559	c1ccc(cc1)c2cc(=O)c3c(o2)cc(c(c3O)O)O
BX	baicalein	GLO1	2739	c1ccc(cc1)c2cc(=O)c3c(o2)cc(c(c3O)O)O
BX	baicalein	GUSB	2990	c1ccc(cc1)c2cc(=O)c3c(o2)cc(c(c3O)O)O
BX	baicalein	HIF1A	3091	c1ccc(cc1)c2cc(=O)c3c(o2)cc(c(c3O)O)O
BX	baicalein	HIF1A	3091	c1ccc(cc1)c2cc(=O)c3c(o2)cc(c(c3O)O)O
BX	baicalein	HTR7	3363	c1ccc(cc1)c2cc(=O)c3c(o2)cc(c(c3O)O)O
BX	baicalein	IGF2	3481	c1ccc(cc1)c2cc(=O)c3c(o2)cc(c(c3O)O)O
BX	baicalein	JUN	3725	c1ccc(cc1)c2cc(=O)c3c(o2)cc(c(c3O)O)O
BX	baicalein	MAPT	4137	c1ccc(cc1)c2cc(=O)c3c(o2)cc(c(c3O)O)O
BX	baicalein	MCL1	4170	c1ccc(cc1)c2cc(=O)c3c(o2)cc(c(c3O)O)O
BX	baicalein	MMP9	4318	c1ccc(cc1)c2cc(=O)c3c(o2)cc(c(c3O)O)O
BX	baicalein	MPO	4353	c1ccc(cc1)c2cc(=O)c3c(o2)cc(c(c3O)O)O
BX	baicalein	NEU2	4759	c1ccc(cc1)c2cc(=O)c3c(o2)cc(c(c3O)O)O
BX	baicalein	NFATC1	4772	c1ccc(cc1)c2cc(=O)c3c(o2)cc(c(c3O)O)O
BX	baicalein	PREP	5550	c1ccc(cc1)c2cc(=O)c3c(o2)cc(c(c3O)O)O
BX	baicalein	PTGS2	5743	c1ccc(cc1)c2cc(=O)c3c(o2)cc(c(c3O)O)O
BX	baicalein	PTGS2	5743	c1ccc(cc1)c2cc(=O)c3c(o2)cc(c(c3O)O)O
BX	baicalein	RELA	5970	c1ccc(cc1)c2cc(=O)c3c(o2)cc(c(c3O)O)O
BX	baicalein	SELE	6401	c1ccc(cc1)c2cc(=O)c3c(o2)cc(c(c3O)O)O
BX	baicalein	SI	6476	c1ccc(cc1)c2cc(=O)c3c(o2)cc(c(c3O)O)O
BX	baicalein	SNCA	6622	c1ccc(cc1)c2cc(=O)c3c(o2)cc(c(c3O)O)O
BX	baicalein	SRC	6714	c1ccc(cc1)c2cc(=O)c3c(o2)cc(c(c3O)O)O
BX	baicalein	TNF	7124	c1ccc(cc1)c2cc(=O)c3c(o2)cc(c(c3O)O)O
BX	baicalein	TNF	7124	c1ccc(cc1)c2cc(=O)c3c(o2)cc(c(c3O)O)O
BX	baicalein	TP53	7157	c1ccc(cc1)c2cc(=O)c3c(o2)cc(c(c3O)O)O
BX	baicalein	UGT2B15	7366	c1ccc(cc1)c2cc(=O)c3c(o2)cc(c(c3O)O)O
BX	baicalein	VEGFA	7422	c1ccc(cc1)c2cc(=O)c3c(o2)cc(c(c3O)O)O
BX	baicalein	XDH	7498	c1ccc(cc1)c2cc(=O)c3c(o2)cc(c(c3O)O)O
BX	baicalein	XDH	7498	c1ccc(cc1)c2cc(=O)c3c(o2)cc(c(c3O)O)O
BX	baicalein	FOSL1	8061	c1ccc(cc1)c2cc(=O)c3c(o2)cc(c(c3O)O)O
BX	baicalein	MGAM	8972	c1ccc(cc1)c2cc(=O)c3c(o2)cc(c(c3O)O)O
BX	baicalein	TDRD7	23424	c1ccc(cc1)c2cc(=O)c3c(o2)cc(c(c3O)O)O
BX	baicalein	CYCS	54205	c1ccc(cc1)c2cc(=O)c3c(o2)cc(c(c3O)O)O
BX	baicalein	EGLN1	54583	c1ccc(cc1)c2cc(=O)c3c(o2)cc(c(c3O)O)O
BX	baicalein	UGT1A1	54658	c1ccc(cc1)c2cc(=O)c3c(o2)cc(c(c3O)O)O
BX	baicalein	NOX5	79400	c1ccc(cc1)c2cc(=O)c3c(o2)cc(c(c3O)O)O
BX	baicalein	LOC100129485	100129485	c1ccc(cc1)c2cc(=O)c3c(o2)cc(c(c3O)O)O
BX	baicalein	LOC100129485	100129485	c1ccc(cc1)c2cc(=O)c3c(o2)cc(c(c3O)O)O
BX	baicalin	APOH	350	c1ccc(cc1)c2cc(=O)c3c(o2)cc(c(c3O)O)O[C@H]4[C@@H]([C@H]([C@@H]([C@H](O4)C(=O)[O-])O)O)O
BX	baicalin	CDK1	983	c1ccc(cc1)c2cc(=O)c3c(o2)cc(c(c3O)O)O[C@H]4[C@@H]([C@H]([C@@H]([C@H](O4)C(=O)[O-])O)O)O
BX	baicalin	CYP3A4	1576	c1ccc(cc1)c2cc(=O)c3c(o2)cc(c(c3O)O)O[C@H]4[C@@H]([C@H]([C@@H]([C@H](O4)C(=O)[O-])O)O)O
BX	baicalin	DPP4	1803	c1ccc(cc1)c2cc(=O)c3c(o2)cc(c(c3O)O)O[C@H]4[C@@H]([C@H]([C@@H]([C@H](O4)C(=O)[O-])O)O)O
BX	baicalin	ESR1	2099	c1ccc(cc1)c2cc(=O)c3c(o2)cc(c(c3O)O)O[C@H]4[C@@H]([C@H]([C@@H]([C@H](O4)C(=O)[O-])O)O)O
BX	baicalin	HIF1A	3091	c1ccc(cc1)c2cc(=O)c3c(o2)cc(c(c3O)O)O[C@H]4[C@@H]([C@H]([C@@H]([C@H](O4)C(=O)[O-])O)O)O
BX	baicalin	HMOX1	3162	c1ccc(cc1)c2cc(=O)c3c(o2)cc(c(c3O)O)O[C@H]4[C@@H]([C@H]([C@@H]([C@H](O4)C(=O)[O-])O)O)O
BX	baicalin	HTR7	3363	c1ccc(cc1)c2cc(=O)c3c(o2)cc(c(c3O)O)O[C@H]4[C@@H]([C@H]([C@@H]([C@H](O4)C(=O)[O-])O)O)O
BX	baicalin	MC3R	4159	c1ccc(cc1)c2cc(=O)c3c(o2)cc(c(c3O)O)O[C@H]4[C@@H]([C@H]([C@@H]([C@H](O4)C(=O)[O-])O)O)O
BX	baicalin	MMP2	4313	c1ccc(cc1)c2cc(=O)c3c(o2)cc(c(c3O)O)O[C@H]4[C@@H]([C@H]([C@@H]([C@H](O4)C(=O)[O-])O)O)O
BX	baicalin	MMP8	4317	c1ccc(cc1)c2cc(=O)c3c(o2)cc(c(c3O)O)O[C@H]4[C@@H]([C@H]([C@@H]([C@H](O4)C(=O)[O-])O)O)O
BX	baicalin	NOTCH1	4851	c1ccc(cc1)c2cc(=O)c3c(o2)cc(c(c3O)O)O[C@H]4[C@@H]([C@H]([C@@H]([C@H](O4)C(=O)[O-])O)O)O
BX	baicalin	PREP	5550	c1ccc(cc1)c2cc(=O)c3c(o2)cc(c(c3O)O)O[C@H]4[C@@H]([C@H]([C@@H]([C@H](O4)C(=O)[O-])O)O)O
BX	baicalin	PREP	5550	c1ccc(cc1)c2cc(=O)c3c(o2)cc(c(c3O)O)O[C@H]4[C@@H]([C@H]([C@@H]([C@H](O4)C(=O)[O-])O)O)O
BX	baicalin	PTGS2	5743	c1ccc(cc1)c2cc(=O)c3c(o2)cc(c(c3O)O)O[C@H]4[C@@H]([C@H]([C@@H]([C@H](O4)C(=O)[O-])O)O)O
BX	baicalin	SLCO1B1	10599	c1ccc(cc1)c2cc(=O)c3c(o2)cc(c(c3O)O)O[C@H]4[C@@H]([C@H]([C@@H]([C@H](O4)C(=O)[O-])O)O)O
BX	baicalin	SLCO2B1	11309	c1ccc(cc1)c2cc(=O)c3c(o2)cc(c(c3O)O)O[C@H]4[C@@H]([C@H]([C@@H]([C@H](O4)C(=O)[O-])O)O)O
BX	baicalin	SLCO1B3	28234	c1ccc(cc1)c2cc(=O)c3c(o2)cc(c(c3O)O)O[C@H]4[C@@H]([C@H]([C@@H]([C@H](O4)C(=O)[O-])O)O)O
BX	benzaldehyde	CYP2A6	1548	c1ccc(cc1)C=O
BX	benzaldehyde	CYP2A6	1548	c1ccc(cc1)C=O
BX	benzaldehyde	ESR1	2099	c1ccc(cc1)C=O
BX	benzaldehyde	GCLC	2729	c1ccc(cc1)C=O
BX	benzaldehyde	JUN	3725	c1ccc(cc1)C=O
BX	benzaldehyde	MMP9	4318	c1ccc(cc1)C=O
BX	benzaldehyde	ODC1	4953	c1ccc(cc1)C=O
BX	benzaldehyde	MAPK1	5594	c1ccc(cc1)C=O
BX	benzaldehyde	TYR	7299	c1ccc(cc1)C=O
BX	benzaldehyde	TYR	7299	c1ccc(cc1)C=O
BX	benzaldehyde	THA1P	390816	c1ccc(cc1)C=O
BX	choline	ABCA1	19	C[N+](C)(C)CCO
BX	choline	ACHE	43	C[N+](C)(C)CCO
BX	choline	ACHE	43	C[N+](C)(C)CCO
BX	choline	ACHE	43	C[N+](C)(C)CCO
BX	choline	ACHE	43	C[N+](C)(C)CCO
BX	choline	ACHE	43	C[N+](C)(C)CCO
BX	choline	KLK3	354	C[N+](C)(C)CCO
BX	choline	ALDH7A1	501	C[N+](C)(C)CCO
BX	choline	BCHE	590	C[N+](C)(C)CCO
BX	choline	BCHE	590	C[N+](C)(C)CCO
BX	choline	BCHE	590	C[N+](C)(C)CCO
BX	choline	BDNF	627	C[N+](C)(C)CCO
BX	choline	BDNF	627	C[N+](C)(C)CCO
BX	choline	BHMT	635	C[N+](C)(C)CCO
BX	choline	BHMT	635	C[N+](C)(C)CCO
BX	choline	C4B	721	C[N+](C)(C)CCO
BX	choline	CTSC	1075	C[N+](C)(C)CCO
BX	choline	CHAT	1103	C[N+](C)(C)CCO
BX	choline	CHAT	1103	C[N+](C)(C)CCO
BX	choline	CHAT	1103	C[N+](C)(C)CCO
BX	choline	CHAT	1103	C[N+](C)(C)CCO
BX	choline	CHKA	1119	C[N+](C)(C)CCO
BX	choline	CHKA	1119	C[N+](C)(C)CCO
BX	choline	CHKA	1119	C[N+](C)(C)CCO
BX	choline	CHKB	1120	C[N+](C)(C)CCO
BX	choline	CHKB	1120	C[N+](C)(C)CCO
BX	choline	CHRM3	1131	C[N+](C)(C)CCO
BX	choline	CHRNA1	1134	C[N+](C)(C)CCO
BX	choline	CHRNA3	1136	C[N+](C)(C)CCO
BX	choline	CHRNA4	1137	C[N+](C)(C)CCO
BX	choline	CHRNA4	1137	C[N+](C)(C)CCO
BX	choline	CHRNB1	1140	C[N+](C)(C)CCO
BX	choline	CHRND	1144	C[N+](C)(C)CCO
BX	choline	CHRNE	1145	C[N+](C)(C)CCO
BX	choline	CKB	1152	C[N+](C)(C)CCO
BX	choline	CKM	1158	C[N+](C)(C)CCO
BX	choline	CKMT1B	1159	C[N+](C)(C)CCO
BX	choline	CKMT2	1160	C[N+](C)(C)CCO
BX	choline	CRAT	1384	C[N+](C)(C)CCO
BX	choline	CSN1S1	1446	C[N+](C)(C)CCO
BX	choline	CSN3	1448	C[N+](C)(C)CCO
BX	choline	CSTB	1476	C[N+](C)(C)CCO
BX	choline	CYP2E1	1571	C[N+](C)(C)CCO
BX	choline	CFD	1675	C[N+](C)(C)CCO
BX	choline	DNAH8	1769	C[N+](C)(C)CCO
BX	choline	ETFDH	2110	C[N+](C)(C)CCO
BX	choline	FABP3	2170	C[N+](C)(C)CCO
BX	choline	FMO3	2328	C[N+](C)(C)CCO
BX	choline	GAD2	2572	C[N+](C)(C)CCO
BX	choline	GCG	2641	C[N+](C)(C)CCO
BX	choline	GCG	2641	C[N+](C)(C)CCO
BX	choline	GPLD1	2822	C[N+](C)(C)CCO
BX	choline	GYPE	2996	C[N+](C)(C)CCO
BX	choline	HMGB1	3146	C[N+](C)(C)CCO
BX	choline	HMGB1	3146	C[N+](C)(C)CCO
BX	choline	IGBP1	3476	C[N+](C)(C)CCO
BX	choline	IGF2	3481	C[N+](C)(C)CCO
BX	choline	IL4	3565	C[N+](C)(C)CCO
BX	choline	IL5	3567	C[N+](C)(C)CCO
BX	choline	INS	3630	C[N+](C)(C)CCO
BX	choline	INS	3630	C[N+](C)(C)CCO
BX	choline	LCAT	3931	C[N+](C)(C)CCO
BX	choline	LCT	3938	C[N+](C)(C)CCO
BX	choline	LYZ	4069	C[N+](C)(C)CCO
BX	choline	MAT1A	4143	C[N+](C)(C)CCO
BX	choline	MGP	4256	C[N+](C)(C)CCO
BX	choline	MITF	4286	C[N+](C)(C)CCO
BX	choline	MTR	4548	C[N+](C)(C)CCO
BX	choline	MYC	4609	C[N+](C)(C)CCO
BX	choline	NGF	4803	C[N+](C)(C)CCO
BX	choline	NTRK1	4914	C[N+](C)(C)CCO
BX	choline	OVGP1	5016	C[N+](C)(C)CCO
BX	choline	OXT	5020	C[N+](C)(C)CCO
BX	choline	PCYT1A	5130	C[N+](C)(C)CCO
BX	choline	PCYT1A	5130	C[N+](C)(C)CCO
BX	choline	PDE4A	5141	C[N+](C)(C)CCO
BX	choline	ENPP2	5168	C[N+](C)(C)CCO
BX	choline	SLC25A3	5250	C[N+](C)(C)CCO
BX	choline	PLA2G1B	5319	C[N+](C)(C)CCO
BX	choline	PLA2G2A	5320	C[N+](C)(C)CCO
BX	choline	PLD1	5337	C[N+](C)(C)CCO
BX	choline	PLD1	5337	C[N+](C)(C)CCO
BX	choline	PLD1	5337	C[N+](C)(C)CCO
BX	choline	PLD2	5338	C[N+](C)(C)CCO
BX	choline	PLD2	5338	C[N+](C)(C)CCO
BX	choline	PLD2	5338	C[N+](C)(C)CCO
BX	choline	PMCH	5367	C[N+](C)(C)CCO
BX	choline	PRL	5617	C[N+](C)(C)CCO
BX	choline	RAB3A	5864	C[N+](C)(C)CCO
BX	choline	REN	5972	C[N+](C)(C)CCO
BX	choline	REN	5972	C[N+](C)(C)CCO
BX	choline	S100A4	6275	C[N+](C)(C)CCO
BX	choline	S100A4	6275	C[N+](C)(C)CCO
BX	choline	SAA4	6291	C[N+](C)(C)CCO
BX	choline	SLC18A3	6572	C[N+](C)(C)CCO
BX	choline	SLC18A3	6572	C[N+](C)(C)CCO
BX	choline	SLC22A1	6580	C[N+](C)(C)CCO
BX	choline	SLC22A1	6580	C[N+](C)(C)CCO
BX	choline	SLC22A1	6580	C[N+](C)(C)CCO
BX	choline	SLC22A3	6581	C[N+](C)(C)CCO
BX	choline	SLC22A3	6581	C[N+](C)(C)CCO
BX	choline	SLC22A2	6582	C[N+](C)(C)CCO
BX	choline	SLC22A2	6582	C[N+](C)(C)CCO
BX	choline	SLC22A4	6583	C[N+](C)(C)CCO
BX	choline	SLC22A4	6583	C[N+](C)(C)CCO
BX	choline	SLC22A5	6584	C[N+](C)(C)CCO
BX	choline	SLC22A5	6584	C[N+](C)(C)CCO
BX	choline	SUV39H1	6839	C[N+](C)(C)CCO
BX	choline	VAMP2	6844	C[N+](C)(C)CCO
BX	choline	SYT1	6857	C[N+](C)(C)CCO
BX	choline	TH	7054	C[N+](C)(C)CCO
BX	choline	TNF	7124	C[N+](C)(C)CCO
BX	choline	TNF	7124	C[N+](C)(C)CCO
BX	choline	TNF	7124	C[N+](C)(C)CCO
BX	choline	PLA2G4C	8605	C[N+](C)(C)CCO
BX	choline	RTCA	8634	C[N+](C)(C)CCO
BX	choline	CDS2	8760	C[N+](C)(C)CCO
BX	choline	PCSK7	9159	C[N+](C)(C)CCO
BX	choline	PCYT1B	9468	C[N+](C)(C)CCO
BX	choline	PCYT1B	9468	C[N+](C)(C)CCO
BX	choline	PGS1	9489	C[N+](C)(C)CCO
BX	choline	ABCG1	9619	C[N+](C)(C)CCO
BX	choline	KIAA0101	9768	C[N+](C)(C)CCO
BX	choline	PTDSS1	9791	C[N+](C)(C)CCO
BX	choline	PTDSS1	9791	C[N+](C)(C)CCO
BX	choline	CLEC2B	9976	C[N+](C)(C)CCO
BX	choline	CEPT1	10390	C[N+](C)(C)CCO
BX	choline	CEPT1	10390	C[N+](C)(C)CCO
BX	choline	PEMT	10400	C[N+](C)(C)CCO
BX	choline	PEMT	10400	C[N+](C)(C)CCO
BX	choline	AGPAT1	10554	C[N+](C)(C)CCO
BX	choline	AGPAT1	10554	C[N+](C)(C)CCO
BX	choline	VPS13A	23230	C[N+](C)(C)CCO
BX	choline	SLC44A1	23446	C[N+](C)(C)CCO
BX	choline	SLC44A1	23446	C[N+](C)(C)CCO
BX	choline	SLC44A1	23446	C[N+](C)(C)CCO
BX	choline	SMUG1	23583	C[N+](C)(C)CCO
BX	choline	SMUG1	23583	C[N+](C)(C)CCO
BX	choline	PLD3	23646	C[N+](C)(C)CCO
BX	choline	PLD3	23646	C[N+](C)(C)CCO
BX	choline	PISD	23761	C[N+](C)(C)CCO
BX	choline	NGFRAP1	27018	C[N+](C)(C)CCO
BX	choline	GNMT	27232	C[N+](C)(C)CCO
BX	choline	SRPX2	27286	C[N+](C)(C)CCO
BX	choline	IGHV4-39	28394	C[N+](C)(C)CCO
BX	choline	DMGDH	29958	C[N+](C)(C)CCO
BX	choline	ISYNA1	51477	C[N+](C)(C)CCO
BX	choline	ETNK2	55224	C[N+](C)(C)CCO
BX	choline	CHDH	55349	C[N+](C)(C)CCO
BX	choline	CHDH	55349	C[N+](C)(C)CCO
BX	choline	CHDH	55349	C[N+](C)(C)CCO
BX	choline	ETNK1	55500	C[N+](C)(C)CCO
BX	choline	ETNK1	55500	C[N+](C)(C)CCO
BX	choline	GPCPD1	56261	C[N+](C)(C)CCO
BX	choline	CHPT1	56994	C[N+](C)(C)CCO
BX	choline	CHPT1	56994	C[N+](C)(C)CCO
BX	choline	SLC44A2	57153	C[N+](C)(C)CCO
BX	choline	SLC44A2	57153	C[N+](C)(C)CCO
BX	choline	SLC44A2	57153	C[N+](C)(C)CCO
BX	choline	SLC5A7	60482	C[N+](C)(C)CCO
BX	choline	SLC5A7	60482	C[N+](C)(C)CCO
BX	choline	SLC5A7	60482	C[N+](C)(C)CCO
BX	choline	CENPK	64105	C[N+](C)(C)CCO
BX	choline	PLA2G2F	64600	C[N+](C)(C)CCO
BX	choline	PLBD1	79887	C[N+](C)(C)CCO
BX	choline	SLC44A4	80736	C[N+](C)(C)CCO
BX	choline	PTDSS2	81490	C[N+](C)(C)CCO
BX	choline	PTDSS2	81490	C[N+](C)(C)CCO
BX	choline	EPT1	85465	C[N+](C)(C)CCO
BX	choline	DCD	117159	C[N+](C)(C)CCO
BX	choline	PLD4	122618	C[N+](C)(C)CCO
BX	choline	PLD4	122618	C[N+](C)(C)CCO
BX	choline	PLA2G4E	123745	C[N+](C)(C)CCO
BX	choline	SLC44A3	126969	C[N+](C)(C)CCO
BX	choline	SLC44A3	126969	C[N+](C)(C)CCO
BX	choline	ENPP6	133121	C[N+](C)(C)CCO
BX	choline	PHOSPHO1	162466	C[N+](C)(C)CCO
BX	choline	PHOSPHO1	162466	C[N+](C)(C)CCO
BX	choline	SGMS2	166929	C[N+](C)(C)CCO
BX	choline	PLD6	201164	C[N+](C)(C)CCO
BX	choline	PLD6	201164	C[N+](C)(C)CCO
BX	choline	SLC44A5	204962	C[N+](C)(C)CCO
BX	choline	SLC44A5	204962	C[N+](C)(C)CCO
BX	choline	PLA2G4F	255189	C[N+](C)(C)CCO
BX	choline	EPGN	255324	C[N+](C)(C)CCO
BX	choline	PLA2G4D	283748	C[N+](C)(C)CCO
BX	choline	TRIM61	391712	C[N+](C)(C)CCO
BX	choline	CKMT1A	548596	C[N+](C)(C)CCO
BX	citral/geranial	CYP2B6	1555	CC(=CCC/C(=C/C=O)/C)C
BX	citral/geranial	NFKBIA	4792	CC(=CCC/C(=C/C=O)/C)C
BX	citral/geranial	OPRM1	4988	CC(=CCC/C(=C/C=O)/C)C
BX	citral/geranial	RELA	5970	CC(=CCC/C(=C/C=O)/C)C
BX	citral/geranial	TNF	7124	CC(=CCC/C(=C/C=O)/C)C
BX	dauricine	IGF1	3479	C[NH+]1CCc2cc(c(cc2[C@H]1Cc3ccc(cc3)Oc4cc(ccc4O)C[C@@H]5c6cc(c(cc6CC[NH+]5C)OC)OC)OC)OC
BX	ephedrine	ACHE	43	C[C@@H]([C@@H](c1ccccc1)O)[NH2+]C
BX	ephedrine	ACHE	43	C[C@@H]([C@@H](c1ccccc1)O)[NH2+]C
BX	ephedrine	ADRA1D	146	C[C@@H]([C@@H](c1ccccc1)O)[NH2+]C
BX	ephedrine	ADRA1B	147	C[C@@H]([C@@H](c1ccccc1)O)[NH2+]C
BX	ephedrine	ADRA1A	148	C[C@@H]([C@@H](c1ccccc1)O)[NH2+]C
BX	ephedrine	ADRA1A	148	C[C@@H]([C@@H](c1ccccc1)O)[NH2+]C
BX	ephedrine	ADRA2A	150	C[C@@H]([C@@H](c1ccccc1)O)[NH2+]C
BX	ephedrine	ADRA2B	151	C[C@@H]([C@@H](c1ccccc1)O)[NH2+]C
BX	ephedrine	ADRA2C	152	C[C@@H]([C@@H](c1ccccc1)O)[NH2+]C
BX	ephedrine	ADRB1	153	C[C@@H]([C@@H](c1ccccc1)O)[NH2+]C
BX	ephedrine	ADRB2	154	C[C@@H]([C@@H](c1ccccc1)O)[NH2+]C
BX	ephedrine	ADRB2	154	C[C@@H]([C@@H](c1ccccc1)O)[NH2+]C
BX	ephedrine	EPHA1	2041	C[C@@H]([C@@H](c1ccccc1)O)[NH2+]C
BX	ephedrine	EPHA1	2041	C[C@@H]([C@@H](c1ccccc1)O)[NH2+]C
BX	ephedrine	FOS	2353	C[C@@H]([C@@H](c1ccccc1)O)[NH2+]C
BX	ephedrine	FOS	2353	C[C@@H]([C@@H](c1ccccc1)O)[NH2+]C
BX	ephedrine	INS	3630	C[C@@H]([C@@H](c1ccccc1)O)[NH2+]C
BX	ephedrine	SLC6A2	6530	C[C@@H]([C@@H](c1ccccc1)O)[NH2+]C
BX	ephedrine	SLC18A2	6571	C[C@@H]([C@@H](c1ccccc1)O)[NH2+]C
BX	ephedrine	SRMS	6725	C[C@@H]([C@@H](c1ccccc1)O)[NH2+]C
BX	ephedrine	MTERFD1	51001	C[C@@H]([C@@H](c1ccccc1)O)[NH2+]C
BX	ephedrine	EMC6	83460	C[C@@H]([C@@H](c1ccccc1)O)[NH2+]C
BX	ephedrine	DOK7	285489	C[C@@H]([C@@H](c1ccccc1)O)[NH2+]C
BX	ephedrine	DOK7	285489	C[C@@H]([C@@H](c1ccccc1)O)[NH2+]C
BX	ephedrine	KRTAP19-7	337974	C[C@@H]([C@@H](c1ccccc1)O)[NH2+]C
BX	ethyl palmitate	IL6	3569	CCCCCCCCCCCCCCCC(=O)OCC
BX	ethyl palmitate	IL10	3586	CCCCCCCCCCCCCCCC(=O)OCC
BX	ethyl palmitate	PTGER3	5733	CCCCCCCCCCCCCCCC(=O)OCC
BX	ethyl palmitate	PTGS2	5743	CCCCCCCCCCCCCCCC(=O)OCC
BX	ethyl palmitate	RELA	5970	CCCCCCCCCCCCCCCC(=O)OCC
BX	ethyl palmitate	TNF	7124	CCCCCCCCCCCCCCCC(=O)OCC
BX	gingerol/6-gingerol	ACHE	43	CCCCC[C@@H](CC(=O)CCc1ccc(c(c1)OC)O)O
BX	gingerol/6-gingerol	ANK1	286	CCCCC[C@@H](CC(=O)CCc1ccc(c(c1)OC)O)O
BX	gingerol/6-gingerol	BIRC5	332	CCCCC[C@@H](CC(=O)CCc1ccc(c(c1)OC)O)O
BX	gingerol/6-gingerol	BAX	581	CCCCC[C@@H](CC(=O)CCc1ccc(c(c1)OC)O)O
BX	gingerol/6-gingerol	BCL2	596	CCCCC[C@@H](CC(=O)CCc1ccc(c(c1)OC)O)O
BX	gingerol/6-gingerol	CASP3	836	CCCCC[C@@H](CC(=O)CCc1ccc(c(c1)OC)O)O
BX	gingerol/6-gingerol	CASP9	842	CCCCC[C@@H](CC(=O)CCc1ccc(c(c1)OC)O)O
BX	gingerol/6-gingerol	HTR1A	3350	CCCCC[C@@H](CC(=O)CCc1ccc(c(c1)OC)O)O
BX	gingerol/6-gingerol	JUN	3725	CCCCC[C@@H](CC(=O)CCc1ccc(c(c1)OC)O)O
BX	gingerol/6-gingerol	MMP2	4313	CCCCC[C@@H](CC(=O)CCc1ccc(c(c1)OC)O)O
BX	gingerol/6-gingerol	MMP9	4318	CCCCC[C@@H](CC(=O)CCc1ccc(c(c1)OC)O)O
BX	gingerol/6-gingerol	PPARG	5468	CCCCC[C@@H](CC(=O)CCc1ccc(c(c1)OC)O)O
BX	gingerol/6-gingerol	PTGS2	5743	CCCCC[C@@H](CC(=O)CCc1ccc(c(c1)OC)O)O
BX	gingerol/6-gingerol	RELA	5970	CCCCC[C@@H](CC(=O)CCc1ccc(c(c1)OC)O)O
BX	gingerol/6-gingerol	TP53	7157	CCCCC[C@@H](CC(=O)CCc1ccc(c(c1)OC)O)O
BX	gingerol/6-gingerol	TRPV1	7442	CCCCC[C@@H](CC(=O)CCc1ccc(c(c1)OC)O)O
BX	gingerol/6-gingerol	TRPV4	59341	CCCCC[C@@H](CC(=O)CCc1ccc(c(c1)OC)O)O
BX	gingerol/6-gingerol	TRPM8	79054	CCCCC[C@@H](CC(=O)CCc1ccc(c(c1)OC)O)O
BX	gingerol/6-gingerol	ABRA	137735	CCCCC[C@@H](CC(=O)CCc1ccc(c(c1)OC)O)O
BX	guanosine	ADA	100	c1nc2c(=O)[nH]c(nc2n1[C@H]3[C@@H]([C@H]([C@@H](O3)CO)O)O)N
BX	guanosine	ADAR	103	c1nc2c(=O)[nH]c(nc2n1[C@H]3[C@@H]([C@H]([C@@H](O3)CO)O)O)N
BX	guanosine	ADCY2	108	c1nc2c(=O)[nH]c(nc2n1[C@H]3[C@@H]([C@H]([C@@H](O3)CO)O)O)N
BX	guanosine	ADCY3	109	c1nc2c(=O)[nH]c(nc2n1[C@H]3[C@@H]([C@H]([C@@H](O3)CO)O)O)N
BX	guanosine	ADCY5	111	c1nc2c(=O)[nH]c(nc2n1[C@H]3[C@@H]([C@H]([C@@H](O3)CO)O)O)N
BX	guanosine	ADCY6	112	c1nc2c(=O)[nH]c(nc2n1[C@H]3[C@@H]([C@H]([C@@H](O3)CO)O)O)N
BX	guanosine	ADCY7	113	c1nc2c(=O)[nH]c(nc2n1[C@H]3[C@@H]([C@H]([C@@H](O3)CO)O)O)N
BX	guanosine	ADCY8	114	c1nc2c(=O)[nH]c(nc2n1[C@H]3[C@@H]([C@H]([C@@H](O3)CO)O)O)N
BX	guanosine	ADCY9	115	c1nc2c(=O)[nH]c(nc2n1[C@H]3[C@@H]([C@H]([C@@H](O3)CO)O)O)N
BX	guanosine	ADK	132	c1nc2c(=O)[nH]c(nc2n1[C@H]3[C@@H]([C@H]([C@@H](O3)CO)O)O)N
BX	guanosine	ADORA1	134	c1nc2c(=O)[nH]c(nc2n1[C@H]3[C@@H]([C@H]([C@@H](O3)CO)O)O)N
BX	guanosine	PARP1	142	c1nc2c(=O)[nH]c(nc2n1[C@H]3[C@@H]([C@H]([C@@H](O3)CO)O)O)N
BX	guanosine	AKT1	207	c1nc2c(=O)[nH]c(nc2n1[C@H]3[C@@H]([C@H]([C@@H](O3)CO)O)O)N
BX	guanosine	APRT	353	c1nc2c(=O)[nH]c(nc2n1[C@H]3[C@@H]([C@H]([C@@H](O3)CO)O)O)N
BX	guanosine	ARF1	375	c1nc2c(=O)[nH]c(nc2n1[C@H]3[C@@H]([C@H]([C@@H](O3)CO)O)O)N
BX	guanosine	ARF3	377	c1nc2c(=O)[nH]c(nc2n1[C@H]3[C@@H]([C@H]([C@@H](O3)CO)O)O)N
BX	guanosine	ARF4	378	c1nc2c(=O)[nH]c(nc2n1[C@H]3[C@@H]([C@H]([C@@H](O3)CO)O)O)N
BX	guanosine	ARF5	381	c1nc2c(=O)[nH]c(nc2n1[C@H]3[C@@H]([C@H]([C@@H](O3)CO)O)O)N
BX	guanosine	ARF6	382	c1nc2c(=O)[nH]c(nc2n1[C@H]3[C@@H]([C@H]([C@@H](O3)CO)O)O)N
BX	guanosine	RHOA	387	c1nc2c(=O)[nH]c(nc2n1[C@H]3[C@@H]([C@H]([C@@H](O3)CO)O)O)N
BX	guanosine	RHOA	387	c1nc2c(=O)[nH]c(nc2n1[C@H]3[C@@H]([C@H]([C@@H](O3)CO)O)O)N
BX	guanosine	RHOG	391	c1nc2c(=O)[nH]c(nc2n1[C@H]3[C@@H]([C@H]([C@@H](O3)CO)O)O)N
BX	guanosine	ARHGDIA	396	c1nc2c(=O)[nH]c(nc2n1[C@H]3[C@@H]([C@H]([C@@H](O3)CO)O)O)N
BX	guanosine	CCK	885	c1nc2c(=O)[nH]c(nc2n1[C@H]3[C@@H]([C@H]([C@@H](O3)CO)O)O)N
BX	guanosine	CD40	958	c1nc2c(=O)[nH]c(nc2n1[C@H]3[C@@H]([C@H]([C@@H](O3)CO)O)O)N
BX	guanosine	CDC42	998	c1nc2c(=O)[nH]c(nc2n1[C@H]3[C@@H]([C@H]([C@@H](O3)CO)O)O)N
BX	guanosine	CDC42	998	c1nc2c(=O)[nH]c(nc2n1[C@H]3[C@@H]([C@H]([C@@H](O3)CO)O)O)N
BX	guanosine	CDKN2A	1029	c1nc2c(=O)[nH]c(nc2n1[C@H]3[C@@H]([C@H]([C@@H](O3)CO)O)O)N
BX	guanosine	DGUOK	1716	c1nc2c(=O)[nH]c(nc2n1[C@H]3[C@@H]([C@H]([C@@H](O3)CO)O)O)N
BX	guanosine	DNM1	1759	c1nc2c(=O)[nH]c(nc2n1[C@H]3[C@@H]([C@H]([C@@H](O3)CO)O)O)N
BX	guanosine	DNM2	1785	c1nc2c(=O)[nH]c(nc2n1[C@H]3[C@@H]([C@H]([C@@H](O3)CO)O)O)N
BX	guanosine	S1PR1	1901	c1nc2c(=O)[nH]c(nc2n1[C@H]3[C@@H]([C@H]([C@@H](O3)CO)O)O)N
BX	guanosine	EEF1A1	1915	c1nc2c(=O)[nH]c(nc2n1[C@H]3[C@@H]([C@H]([C@@H](O3)CO)O)O)N
BX	guanosine	EEF1A2	1917	c1nc2c(=O)[nH]c(nc2n1[C@H]3[C@@H]([C@H]([C@@H](O3)CO)O)O)N
BX	guanosine	EIF4E	1977	c1nc2c(=O)[nH]c(nc2n1[C@H]3[C@@H]([C@H]([C@@H](O3)CO)O)O)N
BX	guanosine	SLC29A1	2030	c1nc2c(=O)[nH]c(nc2n1[C@H]3[C@@H]([C@H]([C@@H](O3)CO)O)O)N
BX	guanosine	SLC29A1	2030	c1nc2c(=O)[nH]c(nc2n1[C@H]3[C@@H]([C@H]([C@@H](O3)CO)O)O)N
BX	guanosine	FPR2	2358	c1nc2c(=O)[nH]c(nc2n1[C@H]3[C@@H]([C@H]([C@@H](O3)CO)O)O)N
BX	guanosine	FPR3	2359	c1nc2c(=O)[nH]c(nc2n1[C@H]3[C@@H]([C@H]([C@@H](O3)CO)O)O)N
BX	guanosine	MTOR	2475	c1nc2c(=O)[nH]c(nc2n1[C@H]3[C@@H]([C@H]([C@@H](O3)CO)O)O)N
BX	guanosine	GCG	2641	c1nc2c(=O)[nH]c(nc2n1[C@H]3[C@@H]([C@H]([C@@H](O3)CO)O)O)N
BX	guanosine	GCGR	2642	c1nc2c(=O)[nH]c(nc2n1[C@H]3[C@@H]([C@H]([C@@H](O3)CO)O)O)N
BX	guanosine	GFAP	2670	c1nc2c(=O)[nH]c(nc2n1[C@H]3[C@@H]([C@H]([C@@H](O3)CO)O)O)N
BX	guanosine	GMPR	2766	c1nc2c(=O)[nH]c(nc2n1[C@H]3[C@@H]([C@H]([C@@H](O3)CO)O)O)N
BX	guanosine	GRP	2922	c1nc2c(=O)[nH]c(nc2n1[C@H]3[C@@H]([C@H]([C@@H](O3)CO)O)O)N
BX	guanosine	GUCY1A3	2982	c1nc2c(=O)[nH]c(nc2n1[C@H]3[C@@H]([C@H]([C@@H](O3)CO)O)O)N
BX	guanosine	GYPC	2995	c1nc2c(=O)[nH]c(nc2n1[C@H]3[C@@H]([C@H]([C@@H](O3)CO)O)O)N
BX	guanosine	SLC29A2	3177	c1nc2c(=O)[nH]c(nc2n1[C@H]3[C@@H]([C@H]([C@@H](O3)CO)O)O)N
BX	guanosine	HTR1A	3350	c1nc2c(=O)[nH]c(nc2n1[C@H]3[C@@H]([C@H]([C@@H](O3)CO)O)O)N
BX	guanosine	IMPDH1	3614	c1nc2c(=O)[nH]c(nc2n1[C@H]3[C@@H]([C@H]([C@@H](O3)CO)O)O)N
BX	guanosine	IMPDH1	3614	c1nc2c(=O)[nH]c(nc2n1[C@H]3[C@@H]([C@H]([C@@H](O3)CO)O)O)N
BX	guanosine	IMPDH2	3615	c1nc2c(=O)[nH]c(nc2n1[C@H]3[C@@H]([C@H]([C@@H](O3)CO)O)O)N
BX	guanosine	KNG1	3827	c1nc2c(=O)[nH]c(nc2n1[C@H]3[C@@H]([C@H]([C@@H](O3)CO)O)O)N
BX	guanosine	MECP2	4204	c1nc2c(=O)[nH]c(nc2n1[C@H]3[C@@H]([C@H]([C@@H](O3)CO)O)O)N
BX	guanosine	MTNR1B	4544	c1nc2c(=O)[nH]c(nc2n1[C@H]3[C@@H]([C@H]([C@@H](O3)CO)O)O)N
BX	guanosine	PPP1R12A	4659	c1nc2c(=O)[nH]c(nc2n1[C@H]3[C@@H]([C@H]([C@@H](O3)CO)O)O)N
BX	guanosine	PNP	4860	c1nc2c(=O)[nH]c(nc2n1[C@H]3[C@@H]([C@H]([C@@H](O3)CO)O)O)N
BX	guanosine	PNP	4860	c1nc2c(=O)[nH]c(nc2n1[C@H]3[C@@H]([C@H]([C@@H](O3)CO)O)O)N
BX	guanosine	NPPA	4878	c1nc2c(=O)[nH]c(nc2n1[C@H]3[C@@H]([C@H]([C@@H](O3)CO)O)O)N
BX	guanosine	NPPA	4878	c1nc2c(=O)[nH]c(nc2n1[C@H]3[C@@H]([C@H]([C@@H](O3)CO)O)O)N
BX	guanosine	NPR1	4881	c1nc2c(=O)[nH]c(nc2n1[C@H]3[C@@H]([C@H]([C@@H](O3)CO)O)O)N
BX	guanosine	NT5E	4907	c1nc2c(=O)[nH]c(nc2n1[C@H]3[C@@H]([C@H]([C@@H](O3)CO)O)O)N
BX	guanosine	PIK3CG	5294	c1nc2c(=O)[nH]c(nc2n1[C@H]3[C@@H]([C@H]([C@@H](O3)CO)O)O)N
BX	guanosine	PLD1	5337	c1nc2c(=O)[nH]c(nc2n1[C@H]3[C@@H]([C@H]([C@@H](O3)CO)O)O)N
BX	guanosine	PLEK	5341	c1nc2c(=O)[nH]c(nc2n1[C@H]3[C@@H]([C@H]([C@@H](O3)CO)O)O)N
BX	guanosine	42618	5413	c1nc2c(=O)[nH]c(nc2n1[C@H]3[C@@H]([C@H]([C@@H](O3)CO)O)O)N
BX	guanosine	PRKAR2A	5576	c1nc2c(=O)[nH]c(nc2n1[C@H]3[C@@H]([C@H]([C@@H](O3)CO)O)O)N
BX	guanosine	PRKG1	5592	c1nc2c(=O)[nH]c(nc2n1[C@H]3[C@@H]([C@H]([C@@H](O3)CO)O)O)N
BX	guanosine	PRKG2	5593	c1nc2c(=O)[nH]c(nc2n1[C@H]3[C@@H]([C@H]([C@@H](O3)CO)O)O)N
BX	guanosine	PYGB	5834	c1nc2c(=O)[nH]c(nc2n1[C@H]3[C@@H]([C@H]([C@@H](O3)CO)O)O)N
BX	guanosine	PYGL	5836	c1nc2c(=O)[nH]c(nc2n1[C@H]3[C@@H]([C@H]([C@@H](O3)CO)O)O)N
BX	guanosine	PYGM	5837	c1nc2c(=O)[nH]c(nc2n1[C@H]3[C@@H]([C@H]([C@@H](O3)CO)O)O)N
BX	guanosine	RAB1A	5861	c1nc2c(=O)[nH]c(nc2n1[C@H]3[C@@H]([C@H]([C@@H](O3)CO)O)O)N
BX	guanosine	RAB3A	5864	c1nc2c(=O)[nH]c(nc2n1[C@H]3[C@@H]([C@H]([C@@H](O3)CO)O)O)N
BX	guanosine	RAB4A	5867	c1nc2c(=O)[nH]c(nc2n1[C@H]3[C@@H]([C@H]([C@@H](O3)CO)O)O)N
BX	guanosine	RAB6A	5870	c1nc2c(=O)[nH]c(nc2n1[C@H]3[C@@H]([C@H]([C@@H](O3)CO)O)O)N
BX	guanosine	RAC1	5879	c1nc2c(=O)[nH]c(nc2n1[C@H]3[C@@H]([C@H]([C@@H](O3)CO)O)O)N
BX	guanosine	RAC2	5880	c1nc2c(=O)[nH]c(nc2n1[C@H]3[C@@H]([C@H]([C@@H](O3)CO)O)O)N
BX	guanosine	RALA	5898	c1nc2c(=O)[nH]c(nc2n1[C@H]3[C@@H]([C@H]([C@@H](O3)CO)O)O)N
BX	guanosine	RHO	6010	c1nc2c(=O)[nH]c(nc2n1[C@H]3[C@@H]([C@H]([C@@H](O3)CO)O)O)N
BX	guanosine	SGCB	6443	c1nc2c(=O)[nH]c(nc2n1[C@H]3[C@@H]([C@H]([C@@H](O3)CO)O)O)N
BX	guanosine	SLC2A4	6517	c1nc2c(=O)[nH]c(nc2n1[C@H]3[C@@H]([C@H]([C@@H](O3)CO)O)O)N
BX	guanosine	SRC	6714	c1nc2c(=O)[nH]c(nc2n1[C@H]3[C@@H]([C@H]([C@@H](O3)CO)O)O)N
BX	guanosine	STAT3	6774	c1nc2c(=O)[nH]c(nc2n1[C@H]3[C@@H]([C@H]([C@@H](O3)CO)O)O)N
BX	guanosine	TBL1X	6907	c1nc2c(=O)[nH]c(nc2n1[C@H]3[C@@H]([C@H]([C@@H](O3)CO)O)O)N
BX	guanosine	TIAM1	7074	c1nc2c(=O)[nH]c(nc2n1[C@H]3[C@@H]([C@H]([C@@H](O3)CO)O)O)N
BX	guanosine	TNF	7124	c1nc2c(=O)[nH]c(nc2n1[C@H]3[C@@H]([C@H]([C@@H](O3)CO)O)O)N
BX	guanosine	TUFM	7284	c1nc2c(=O)[nH]c(nc2n1[C@H]3[C@@H]([C@H]([C@@H](O3)CO)O)O)N
BX	guanosine	VAV2	7410	c1nc2c(=O)[nH]c(nc2n1[C@H]3[C@@H]([C@H]([C@@H](O3)CO)O)O)N
BX	guanosine	VIP	7432	c1nc2c(=O)[nH]c(nc2n1[C@H]3[C@@H]([C@H]([C@@H](O3)CO)O)O)N
BX	guanosine	ARHGEF5	7984	c1nc2c(=O)[nH]c(nc2n1[C@H]3[C@@H]([C@H]([C@@H](O3)CO)O)O)N
BX	guanosine	GTPBP6	8225	c1nc2c(=O)[nH]c(nc2n1[C@H]3[C@@H]([C@H]([C@@H](O3)CO)O)O)N
BX	guanosine	BRAP	8315	c1nc2c(=O)[nH]c(nc2n1[C@H]3[C@@H]([C@H]([C@@H](O3)CO)O)O)N
BX	guanosine	SUCLG2	8801	c1nc2c(=O)[nH]c(nc2n1[C@H]3[C@@H]([C@H]([C@@H](O3)CO)O)O)N
BX	guanosine	SUCLG1	8802	c1nc2c(=O)[nH]c(nc2n1[C@H]3[C@@H]([C@H]([C@@H](O3)CO)O)O)N
BX	guanosine	RABEP1	9135	c1nc2c(=O)[nH]c(nc2n1[C@H]3[C@@H]([C@H]([C@@H](O3)CO)O)O)N
BX	guanosine	SLC28A2	9153	c1nc2c(=O)[nH]c(nc2n1[C@H]3[C@@H]([C@H]([C@@H](O3)CO)O)O)N
BX	guanosine	CYTH1	9267	c1nc2c(=O)[nH]c(nc2n1[C@H]3[C@@H]([C@H]([C@@H](O3)CO)O)O)N
BX	guanosine	ABCG2	9429	c1nc2c(=O)[nH]c(nc2n1[C@H]3[C@@H]([C@H]([C@@H](O3)CO)O)O)N
BX	guanosine	GDA	9615	c1nc2c(=O)[nH]c(nc2n1[C@H]3[C@@H]([C@H]([C@@H](O3)CO)O)O)N
BX	guanosine	EIF5B	9669	c1nc2c(=O)[nH]c(nc2n1[C@H]3[C@@H]([C@H]([C@@H](O3)CO)O)O)N
BX	guanosine	ARHGEF11	9826	c1nc2c(=O)[nH]c(nc2n1[C@H]3[C@@H]([C@H]([C@@H](O3)CO)O)O)N
BX	guanosine	LCMT2	9836	c1nc2c(=O)[nH]c(nc2n1[C@H]3[C@@H]([C@H]([C@@H](O3)CO)O)O)N
BX	guanosine	RHOBTB1	9886	c1nc2c(=O)[nH]c(nc2n1[C@H]3[C@@H]([C@H]([C@@H](O3)CO)O)O)N
BX	guanosine	RGS19	10287	c1nc2c(=O)[nH]c(nc2n1[C@H]3[C@@H]([C@H]([C@@H](O3)CO)O)O)N
BX	guanosine	RRAGB	10325	c1nc2c(=O)[nH]c(nc2n1[C@H]3[C@@H]([C@H]([C@@H](O3)CO)O)O)N
BX	guanosine	RNASEH2A	10535	c1nc2c(=O)[nH]c(nc2n1[C@H]3[C@@H]([C@H]([C@@H](O3)CO)O)O)N
BX	guanosine	TBL3	10607	c1nc2c(=O)[nH]c(nc2n1[C@H]3[C@@H]([C@H]([C@@H](O3)CO)O)O)N
BX	guanosine	KIFAP3	22920	c1nc2c(=O)[nH]c(nc2n1[C@H]3[C@@H]([C@H]([C@@H](O3)CO)O)O)N
BX	guanosine	ARHGEF18	23370	c1nc2c(=O)[nH]c(nc2n1[C@H]3[C@@H]([C@H]([C@@H](O3)CO)O)O)N
BX	guanosine	BRI3	25798	c1nc2c(=O)[nH]c(nc2n1[C@H]3[C@@H]([C@H]([C@@H](O3)CO)O)O)N
BX	guanosine	DNM3	26052	c1nc2c(=O)[nH]c(nc2n1[C@H]3[C@@H]([C@H]([C@@H](O3)CO)O)O)N
BX	guanosine	ARHGEF26	26084	c1nc2c(=O)[nH]c(nc2n1[C@H]3[C@@H]([C@H]([C@@H](O3)CO)O)O)N
BX	guanosine	TBL2	26608	c1nc2c(=O)[nH]c(nc2n1[C@H]3[C@@H]([C@H]([C@@H](O3)CO)O)O)N
BX	guanosine	ASAP1	50807	c1nc2c(=O)[nH]c(nc2n1[C@H]3[C@@H]([C@H]([C@@H](O3)CO)O)O)N
BX	guanosine	TLR7	51284	c1nc2c(=O)[nH]c(nc2n1[C@H]3[C@@H]([C@H]([C@@H](O3)CO)O)O)N
BX	guanosine	TLR8	51311	c1nc2c(=O)[nH]c(nc2n1[C@H]3[C@@H]([C@H]([C@@H](O3)CO)O)O)N
BX	guanosine	WNT16	51384	c1nc2c(=O)[nH]c(nc2n1[C@H]3[C@@H]([C@H]([C@@H](O3)CO)O)O)N
BX	guanosine	TLR9	54106	c1nc2c(=O)[nH]c(nc2n1[C@H]3[C@@H]([C@H]([C@@H](O3)CO)O)O)N
BX	guanosine	TERF2IP	54386	c1nc2c(=O)[nH]c(nc2n1[C@H]3[C@@H]([C@H]([C@@H](O3)CO)O)O)N
BX	guanosine	SLC29A3	55315	c1nc2c(=O)[nH]c(nc2n1[C@H]3[C@@H]([C@H]([C@@H](O3)CO)O)O)N
BX	guanosine	SLC29A3	55315	c1nc2c(=O)[nH]c(nc2n1[C@H]3[C@@H]([C@H]([C@@H](O3)CO)O)O)N
BX	guanosine	ADCY10	55811	c1nc2c(=O)[nH]c(nc2n1[C@H]3[C@@H]([C@H]([C@@H](O3)CO)O)O)N
BX	guanosine	RNF130	55819	c1nc2c(=O)[nH]c(nc2n1[C@H]3[C@@H]([C@H]([C@@H](O3)CO)O)O)N
BX	guanosine	PRTFDC1	56952	c1nc2c(=O)[nH]c(nc2n1[C@H]3[C@@H]([C@H]([C@@H](O3)CO)O)O)N
BX	guanosine	SMURF1	57154	c1nc2c(=O)[nH]c(nc2n1[C@H]3[C@@H]([C@H]([C@@H](O3)CO)O)O)N
BX	guanosine	RRAGD	58528	c1nc2c(=O)[nH]c(nc2n1[C@H]3[C@@H]([C@H]([C@@H](O3)CO)O)O)N
BX	guanosine	SLC28A3	64078	c1nc2c(=O)[nH]c(nc2n1[C@H]3[C@@H]([C@H]([C@@H](O3)CO)O)O)N
BX	guanosine	GOLPH3	64083	c1nc2c(=O)[nH]c(nc2n1[C@H]3[C@@H]([C@H]([C@@H](O3)CO)O)O)N
BX	guanosine	RRAGC	64121	c1nc2c(=O)[nH]c(nc2n1[C@H]3[C@@H]([C@H]([C@@H](O3)CO)O)O)N
BX	guanosine	LOC65440	65440	c1nc2c(=O)[nH]c(nc2n1[C@H]3[C@@H]([C@H]([C@@H](O3)CO)O)O)N
BX	guanosine	TBL1XR1	79718	c1nc2c(=O)[nH]c(nc2n1[C@H]3[C@@H]([C@H]([C@@H](O3)CO)O)O)N
BX	guanosine	TBC1D10A	83874	c1nc2c(=O)[nH]c(nc2n1[C@H]3[C@@H]([C@H]([C@@H](O3)CO)O)O)N
BX	guanosine	CARD11	84433	c1nc2c(=O)[nH]c(nc2n1[C@H]3[C@@H]([C@H]([C@@H](O3)CO)O)O)N
BX	guanosine	NT5C1A	84618	c1nc2c(=O)[nH]c(nc2n1[C@H]3[C@@H]([C@H]([C@@H](O3)CO)O)O)N
BX	guanosine	ADO	84890	c1nc2c(=O)[nH]c(nc2n1[C@H]3[C@@H]([C@H]([C@@H](O3)CO)O)O)N
BX	guanosine	TBL1Y	90665	c1nc2c(=O)[nH]c(nc2n1[C@H]3[C@@H]([C@H]([C@@H](O3)CO)O)O)N
BX	guanosine	NT5C1B	93034	c1nc2c(=O)[nH]c(nc2n1[C@H]3[C@@H]([C@H]([C@@H](O3)CO)O)O)N
BX	guanosine	TGS1	96764	c1nc2c(=O)[nH]c(nc2n1[C@H]3[C@@H]([C@H]([C@@H](O3)CO)O)O)N
BX	guanosine	TYW3	127253	c1nc2c(=O)[nH]c(nc2n1[C@H]3[C@@H]([C@H]([C@@H](O3)CO)O)O)N
BX	guanosine	ADCY4	196883	c1nc2c(=O)[nH]c(nc2n1[C@H]3[C@@H]([C@H]([C@@H](O3)CO)O)O)N
BX	guanosine	SCAI	286205	c1nc2c(=O)[nH]c(nc2n1[C@H]3[C@@H]([C@H]([C@@H](O3)CO)O)O)N
BX	guanosine	IRGM	345611	c1nc2c(=O)[nH]c(nc2n1[C@H]3[C@@H]([C@H]([C@@H](O3)CO)O)O)N
BX	guanosine	BLOC1S3	388552	c1nc2c(=O)[nH]c(nc2n1[C@H]3[C@@H]([C@H]([C@@H](O3)CO)O)O)N
BX	guanosine	LOC389980	389980	c1nc2c(=O)[nH]c(nc2n1[C@H]3[C@@H]([C@H]([C@@H](O3)CO)O)O)N
BX	guanosine	BP0294	2664148	c1nc2c(=O)[nH]c(nc2n1[C@H]3[C@@H]([C@H]([C@@H](O3)CO)O)O)N
BX	guanosine	BP0294	2664148	c1nc2c(=O)[nH]c(nc2n1[C@H]3[C@@H]([C@H]([C@@H](O3)CO)O)O)N
BX	guanosine	SPAP_0012	9726029	c1nc2c(=O)[nH]c(nc2n1[C@H]3[C@@H]([C@H]([C@@H](O3)CO)O)O)N
BX	guanosine	STBHUCCB_1640	11818666	c1nc2c(=O)[nH]c(nc2n1[C@H]3[C@@H]([C@H]([C@@H](O3)CO)O)O)N
BX	guanosine	TRMD	16663354	c1nc2c(=O)[nH]c(nc2n1[C@H]3[C@@H]([C@H]([C@@H](O3)CO)O)O)N
BX	guanosine	LOC100510614	100510614	c1nc2c(=O)[nH]c(nc2n1[C@H]3[C@@H]([C@H]([C@@H](O3)CO)O)O)N
BX	guanosine	LOC100653311	100653311	c1nc2c(=O)[nH]c(nc2n1[C@H]3[C@@H]([C@H]([C@@H](O3)CO)O)O)N
BX	guanosine	LOC101060112	101060112	c1nc2c(=O)[nH]c(nc2n1[C@H]3[C@@H]([C@H]([C@@H](O3)CO)O)O)N
BX	homogentisic acid	EDA	1896	c1cc(c(cc1O)CC(=O)[O-])O
BX	homogentisic acid	HGD	3081	c1cc(c(cc1O)CC(=O)[O-])O
BX	homogentisic acid	HPD	3242	c1cc(c(cc1O)CC(=O)[O-])O
BX	homogentisic acid	HPD	3242	c1cc(c(cc1O)CC(=O)[O-])O
BX	homogentisic acid	PLOD1	5351	c1cc(c(cc1O)CC(=O)[O-])O
BX	homogentisic acid	PLOD2	5352	c1cc(c(cc1O)CC(=O)[O-])O
BX	homogentisic acid	SPTA1	6708	c1cc(c(cc1O)CC(=O)[O-])O
BX	homogentisic acid	TAT	6898	c1cc(c(cc1O)CC(=O)[O-])O
BX	homogentisic acid	PLOD3	8985	c1cc(c(cc1O)CC(=O)[O-])O
BX	homogentisic acid	MAIA	9745353	c1cc(c(cc1O)CC(=O)[O-])O
BX	homogentisic acid	WEEVI_0208	10281400	c1cc(c(cc1O)CC(=O)[O-])O
BX	homoharringtonine	ACVRL1	94	C[C@]12c3cc4c(cc3CCN5[C@@]1(CCC5)C=C([C@@H]2OC(=O)[C@@](CCCC(C)(C)O)(CC(=O)[O-])O)OC)OCO4
BX	homoharringtonine	BCR	613	C[C@]12c3cc4c(cc3CCN5[C@@]1(CCC5)C=C([C@@H]2OC(=O)[C@@](CCCC(C)(C)O)(CC(=O)[O-])O)OC)OCO4
BX	homoharringtonine	CSF3	1440	C[C@]12c3cc4c(cc3CCN5[C@@]1(CCC5)C=C([C@@H]2OC(=O)[C@@](CCCC(C)(C)O)(CC(=O)[O-])O)OC)OCO4
BX	homoharringtonine	MCL1	4170	C[C@]12c3cc4c(cc3CCN5[C@@]1(CCC5)C=C([C@@H]2OC(=O)[C@@](CCCC(C)(C)O)(CC(=O)[O-])O)OC)OCO4
BX	homoharringtonine	PCNA	5111	C[C@]12c3cc4c(cc3CCN5[C@@]1(CCC5)C=C([C@@H]2OC(=O)[C@@](CCCC(C)(C)O)(CC(=O)[O-])O)OC)OCO4
BX	homoharringtonine	ABCB1	5243	C[C@]12c3cc4c(cc3CCN5[C@@]1(CCC5)C=C([C@@H]2OC(=O)[C@@](CCCC(C)(C)O)(CC(=O)[O-])O)OC)OCO4
BX	homoharringtonine	KLF10	7071	C[C@]12c3cc4c(cc3CCN5[C@@]1(CCC5)C=C([C@@H]2OC(=O)[C@@](CCCC(C)(C)O)(CC(=O)[O-])O)OC)OCO4
BX	phenylalanine	ALPI	248	C[C@@](Cc1cccc(c1)O)(C(=O)[O-])[NH3+]
BX	phenylalanine	ALPL	249	C[C@@](Cc1cccc(c1)O)(C(=O)[O-])[NH3+]
BX	phenylalanine	ALPP	250	C[C@@](Cc1cccc(c1)O)(C(=O)[O-])[NH3+]
BX	phenylalanine	SLC25A4	291	C[C@@](Cc1cccc(c1)O)(C(=O)[O-])[NH3+]
BX	phenylalanine	AVP	551	C[C@@](Cc1cccc(c1)O)(C(=O)[O-])[NH3+]
BX	phenylalanine	C2	717	C[C@@](Cc1cccc(c1)O)(C(=O)[O-])[NH3+]
BX	phenylalanine	CA2	760	C[C@@](Cc1cccc(c1)O)(C(=O)[O-])[NH3+]
BX	phenylalanine	CCBL1	883	C[C@@](Cc1cccc(c1)O)(C(=O)[O-])[NH3+]
BX	phenylalanine	CCK	885	C[C@@](Cc1cccc(c1)O)(C(=O)[O-])[NH3+]
BX	phenylalanine	CTSC	1075	C[C@@](Cc1cccc(c1)O)(C(=O)[O-])[NH3+]
BX	phenylalanine	CRH	1392	C[C@@](Cc1cccc(c1)O)(C(=O)[O-])[NH3+]
BX	phenylalanine	CSN1S1	1446	C[C@@](Cc1cccc(c1)O)(C(=O)[O-])[NH3+]
BX	phenylalanine	DAO	1610	C[C@@](Cc1cccc(c1)O)(C(=O)[O-])[NH3+]
BX	phenylalanine	DDC	1644	C[C@@](Cc1cccc(c1)O)(C(=O)[O-])[NH3+]
BX	phenylalanine	DHODH	1723	C[C@@](Cc1cccc(c1)O)(C(=O)[O-])[NH3+]
BX	phenylalanine	DLD	1738	C[C@@](Cc1cccc(c1)O)(C(=O)[O-])[NH3+]
BX	phenylalanine	EEF2	1938	C[C@@](Cc1cccc(c1)O)(C(=O)[O-])[NH3+]
BX	phenylalanine	F2	2147	C[C@@](Cc1cccc(c1)O)(C(=O)[O-])[NH3+]
BX	phenylalanine	F3	2152	C[C@@](Cc1cccc(c1)O)(C(=O)[O-])[NH3+]
BX	phenylalanine	F7	2155	C[C@@](Cc1cccc(c1)O)(C(=O)[O-])[NH3+]
BX	phenylalanine	F9	2158	C[C@@](Cc1cccc(c1)O)(C(=O)[O-])[NH3+]
BX	phenylalanine	FARSA	2193	C[C@@](Cc1cccc(c1)O)(C(=O)[O-])[NH3+]
BX	phenylalanine	FGA	2243	C[C@@](Cc1cccc(c1)O)(C(=O)[O-])[NH3+]
BX	phenylalanine	FGB	2244	C[C@@](Cc1cccc(c1)O)(C(=O)[O-])[NH3+]
BX	phenylalanine	FGG	2266	C[C@@](Cc1cccc(c1)O)(C(=O)[O-])[NH3+]
BX	phenylalanine	GCH1	2643	C[C@@](Cc1cccc(c1)O)(C(=O)[O-])[NH3+]
BX	phenylalanine	GCHFR	2644	C[C@@](Cc1cccc(c1)O)(C(=O)[O-])[NH3+]
BX	phenylalanine	GOT1	2805	C[C@@](Cc1cccc(c1)O)(C(=O)[O-])[NH3+]
BX	phenylalanine	GOT2	2806	C[C@@](Cc1cccc(c1)O)(C(=O)[O-])[NH3+]
BX	phenylalanine	GZMA	3001	C[C@@](Cc1cccc(c1)O)(C(=O)[O-])[NH3+]
BX	phenylalanine	HPD	3242	C[C@@](Cc1cccc(c1)O)(C(=O)[O-])[NH3+]
BX	phenylalanine	IGLC1	3537	C[C@@](Cc1cccc(c1)O)(C(=O)[O-])[NH3+]
BX	phenylalanine	INS	3630	C[C@@](Cc1cccc(c1)O)(C(=O)[O-])[NH3+]
BX	phenylalanine	KLRB1	3820	C[C@@](Cc1cccc(c1)O)(C(=O)[O-])[NH3+]
BX	phenylalanine	MAOA	4128	C[C@@](Cc1cccc(c1)O)(C(=O)[O-])[NH3+]
BX	phenylalanine	MAOB	4129	C[C@@](Cc1cccc(c1)O)(C(=O)[O-])[NH3+]
BX	phenylalanine	MME	4311	C[C@@](Cc1cccc(c1)O)(C(=O)[O-])[NH3+]
BX	phenylalanine	MMP1	4312	C[C@@](Cc1cccc(c1)O)(C(=O)[O-])[NH3+]
BX	phenylalanine	MMP9	4318	C[C@@](Cc1cccc(c1)O)(C(=O)[O-])[NH3+]
BX	phenylalanine	MYC	4609	C[C@@](Cc1cccc(c1)O)(C(=O)[O-])[NH3+]
BX	phenylalanine	NHP2L1	4809	C[C@@](Cc1cccc(c1)O)(C(=O)[O-])[NH3+]
BX	phenylalanine	OXT	5020	C[C@@](Cc1cccc(c1)O)(C(=O)[O-])[NH3+]
BX	phenylalanine	PAH	5053	C[C@@](Cc1cccc(c1)O)(C(=O)[O-])[NH3+]
BX	phenylalanine	PAM	5066	C[C@@](Cc1cccc(c1)O)(C(=O)[O-])[NH3+]
BX	phenylalanine	PCBD1	5092	C[C@@](Cc1cccc(c1)O)(C(=O)[O-])[NH3+]
BX	phenylalanine	SLC25A3	5250	C[C@@](Cc1cccc(c1)O)(C(=O)[O-])[NH3+]
BX	phenylalanine	PON1	5444	C[C@@](Cc1cccc(c1)O)(C(=O)[O-])[NH3+]
BX	phenylalanine	MAPK1	5594	C[C@@](Cc1cccc(c1)O)(C(=O)[O-])[NH3+]
BX	phenylalanine	PROC	5624	C[C@@](Cc1cccc(c1)O)(C(=O)[O-])[NH3+]
BX	phenylalanine	PRSS8	5652	C[C@@](Cc1cccc(c1)O)(C(=O)[O-])[NH3+]
BX	phenylalanine	QDPR	5860	C[C@@](Cc1cccc(c1)O)(C(=O)[O-])[NH3+]
BX	phenylalanine	RPL4	6124	C[C@@](Cc1cccc(c1)O)(C(=O)[O-])[NH3+]
BX	phenylalanine	RPL8	6132	C[C@@](Cc1cccc(c1)O)(C(=O)[O-])[NH3+]
BX	phenylalanine	RPL9	6133	C[C@@](Cc1cccc(c1)O)(C(=O)[O-])[NH3+]
BX	phenylalanine	RPL11	6135	C[C@@](Cc1cccc(c1)O)(C(=O)[O-])[NH3+]
BX	phenylalanine	RPL37A	6168	C[C@@](Cc1cccc(c1)O)(C(=O)[O-])[NH3+]
BX	phenylalanine	RPLP0	6175	C[C@@](Cc1cccc(c1)O)(C(=O)[O-])[NH3+]
BX	phenylalanine	SDHD	6392	C[C@@](Cc1cccc(c1)O)(C(=O)[O-])[NH3+]
BX	phenylalanine	SLC1A5	6510	C[C@@](Cc1cccc(c1)O)(C(=O)[O-])[NH3+]
BX	phenylalanine	SLC3A1	6519	C[C@@](Cc1cccc(c1)O)(C(=O)[O-])[NH3+]
BX	phenylalanine	SLC3A2	6520	C[C@@](Cc1cccc(c1)O)(C(=O)[O-])[NH3+]
BX	phenylalanine	TAT	6898	C[C@@](Cc1cccc(c1)O)(C(=O)[O-])[NH3+]
BX	phenylalanine	TH	7054	C[C@@](Cc1cccc(c1)O)(C(=O)[O-])[NH3+]
BX	phenylalanine	TUFM	7284	C[C@@](Cc1cccc(c1)O)(C(=O)[O-])[NH3+]
BX	phenylalanine	TYR	7299	C[C@@](Cc1cccc(c1)O)(C(=O)[O-])[NH3+]
BX	phenylalanine	SLC7A5	8140	C[C@@](Cc1cccc(c1)O)(C(=O)[O-])[NH3+]
BX	phenylalanine	SLC43A1	8501	C[C@@](Cc1cccc(c1)O)(C(=O)[O-])[NH3+]
BX	phenylalanine	RPL23	9349	C[C@@](Cc1cccc(c1)O)(C(=O)[O-])[NH3+]
BX	phenylalanine	PRDX6	9588	C[C@@](Cc1cccc(c1)O)(C(=O)[O-])[NH3+]
BX	phenylalanine	FARSB	10056	C[C@@](Cc1cccc(c1)O)(C(=O)[O-])[NH3+]
BX	phenylalanine	RNASEH2A	10535	C[C@@](Cc1cccc(c1)O)(C(=O)[O-])[NH3+]
BX	phenylalanine	FARS2	10667	C[C@@](Cc1cccc(c1)O)(C(=O)[O-])[NH3+]
BX	phenylalanine	SLC7A8	23428	C[C@@](Cc1cccc(c1)O)(C(=O)[O-])[NH3+]
BX	phenylalanine	SULT4A1	25830	C[C@@](Cc1cccc(c1)O)(C(=O)[O-])[NH3+]
BX	phenylalanine	PSAT1	29968	C[C@@](Cc1cccc(c1)O)(C(=O)[O-])[NH3+]
BX	phenylalanine	RSL24D1	51187	C[C@@](Cc1cccc(c1)O)(C(=O)[O-])[NH3+]
BX	phenylalanine	DMRTA1	63951	C[C@@](Cc1cccc(c1)O)(C(=O)[O-])[NH3+]
BX	phenylalanine	MRPL11	65003	C[C@@](Cc1cccc(c1)O)(C(=O)[O-])[NH3+]
BX	phenylalanine	PCBD2	84105	C[C@@](Cc1cccc(c1)O)(C(=O)[O-])[NH3+]
BX	phenylalanine	GFM2	84340	C[C@@](Cc1cccc(c1)O)(C(=O)[O-])[NH3+]
BX	phenylalanine	GFM1	85476	C[C@@](Cc1cccc(c1)O)(C(=O)[O-])[NH3+]
BX	phenylalanine	BOC	91653	C[C@@](Cc1cccc(c1)O)(C(=O)[O-])[NH3+]
BX	phenylalanine	SLC16A10	117247	C[C@@](Cc1cccc(c1)O)(C(=O)[O-])[NH3+]
BX	phenylalanine	SLC43A2	124935	C[C@@](Cc1cccc(c1)O)(C(=O)[O-])[NH3+]
BX	phenylalanine	IL4I1	259307	C[C@@](Cc1cccc(c1)O)(C(=O)[O-])[NH3+]
BX	phenylalanine	SLC6A19	340024	C[C@@](Cc1cccc(c1)O)(C(=O)[O-])[NH3+]
BX	shogaol/6-shogaol	ALOX5	240	CCCCC/C=C/C(=O)CCc1ccc(c(c1)OC)O
BX	shogaol/6-shogaol	ALOX5	240	CCCCC/C=C/C(=O)CCc1ccc(c(c1)OC)O
BX	shogaol/6-shogaol	FASLG	356	CCCCC/C=C/C(=O)CCc1ccc(c(c1)OC)O
BX	shogaol/6-shogaol	BAX	581	CCCCC/C=C/C(=O)CCc1ccc(c(c1)OC)O
BX	shogaol/6-shogaol	BCL2	596	CCCCC/C=C/C(=O)CCc1ccc(c(c1)OC)O
BX	shogaol/6-shogaol	BCL2L1	598	CCCCC/C=C/C(=O)CCc1ccc(c(c1)OC)O
BX	shogaol/6-shogaol	CYP2D6	1565	CCCCC/C=C/C(=O)CCc1ccc(c(c1)OC)O
BX	shogaol/6-shogaol	CYP3A4	1576	CCCCC/C=C/C(=O)CCc1ccc(c(c1)OC)O
BX	shogaol/6-shogaol	DDIT3	1649	CCCCC/C=C/C(=O)CCc1ccc(c(c1)OC)O
BX	shogaol/6-shogaol	FASN	2194	CCCCC/C=C/C(=O)CCc1ccc(c(c1)OC)O
BX	shogaol/6-shogaol	HTR1A	3350	CCCCC/C=C/C(=O)CCc1ccc(c(c1)OC)O
BX	shogaol/6-shogaol	IRF3	3661	CCCCC/C=C/C(=O)CCc1ccc(c(c1)OC)O
BX	shogaol/6-shogaol	MYD88	4615	CCCCC/C=C/C(=O)CCc1ccc(c(c1)OC)O
BX	shogaol/6-shogaol	PPARG	5468	CCCCC/C=C/C(=O)CCc1ccc(c(c1)OC)O
BX	shogaol/6-shogaol	TANK	10010	CCCCC/C=C/C(=O)CCc1ccc(c(c1)OC)O
BX	shogaol/6-shogaol	TBK1	29110	CCCCC/C=C/C(=O)CCc1ccc(c(c1)OC)O
BX	trigonelline	ACHE	43	C[n+]1cccc(c1)C(=O)[O-]
BX	trigonelline	BHMT	635	C[n+]1cccc(c1)C(=O)[O-]
BX	trigonelline	ATN1	1822	C[n+]1cccc(c1)C(=O)[O-]
BX	trigonelline	PTGS2	5743	C[n+]1cccc(c1)C(=O)[O-]
BX	trigonelline	NAMPT	10135	C[n+]1cccc(c1)C(=O)[O-]
BX	beta-sitosterol/beta-Sitosterol	CLM	3912	CC[C@H](CC[C@@H](C)[C@H]1CC[C@@H]2[C@@]1(CC[C@H]3[C@H]2CC=C4[C@@]3(CC[C@@H](C4)O)C)C)C(C)C
BX	beta-sitosterol-3-O-beta-D-glucopyranoside / daucosterol / strumaroside / daucosterin/alexandrin	GSK3B	2932	CC[C@H](CC[C@@H](C)[C@H]1CC[C@@H]2[C@@]1(CC[C@H]3[C@H]2CC=C4[C@@]3(CC[C@@H](C4)O[C@H]5[C@@H]([C@H]([C@@H]([C@H](O5)CO)O)O)O)C)C)C(C)C
BX	beta-sitosterol-3-O-beta-D-glucopyranoside / daucosterol / strumaroside / daucosterin/alexandrin	POLB	5423	CC[C@H](CC[C@@H](C)[C@H]1CC[C@@H]2[C@@]1(CC[C@H]3[C@H]2CC=C4[C@@]3(CC[C@@H](C4)O[C@H]5[C@@H]([C@H]([C@@H]([C@H](O5)CO)O)O)O)C)C)C(C)C
BX	beta-sitosterol-3-O-beta-D-glucopyranoside / daucosterol / strumaroside / daucosterin/alexandrin	SARS	6301	CC[C@H](CC[C@@H](C)[C@H]1CC[C@@H]2[C@@]1(CC[C@H]3[C@H]2CC=C4[C@@]3(CC[C@@H](C4)O[C@H]5[C@@H]([C@H]([C@@H]([C@H](O5)CO)O)O)O)C)C)C(C)C
DZ	(+)-catechin	ACAN	176	c1cc(c(cc1[C@@H]2[C@H](Cc3c(cc(cc3O2)O)O)O)O)O
DZ	(+)-catechin	ASS1	445	c1cc(c(cc1[C@@H]2[C@H](Cc3c(cc(cc3O2)O)O)O)O)O
DZ	(+)-catechin	CA1	759	c1cc(c(cc1[C@@H]2[C@H](Cc3c(cc(cc3O2)O)O)O)O)O
DZ	(+)-catechin	CA2	760	c1cc(c(cc1[C@@H]2[C@H](Cc3c(cc(cc3O2)O)O)O)O)O
DZ	(+)-catechin	CA3	761	c1cc(c(cc1[C@@H]2[C@H](Cc3c(cc(cc3O2)O)O)O)O)O
DZ	(+)-catechin	Ca4	762	c1cc(c(cc1[C@@H]2[C@H](Cc3c(cc(cc3O2)O)O)O)O)O
DZ	(+)-catechin	CA5A	763	c1cc(c(cc1[C@@H]2[C@H](Cc3c(cc(cc3O2)O)O)O)O)O
DZ	(+)-catechin	CA6	765	c1cc(c(cc1[C@@H]2[C@H](Cc3c(cc(cc3O2)O)O)O)O)O
DZ	(+)-catechin	CA7	766	c1cc(c(cc1[C@@H]2[C@H](Cc3c(cc(cc3O2)O)O)O)O)O
DZ	(+)-catechin	CA9	768	c1cc(c(cc1[C@@H]2[C@H](Cc3c(cc(cc3O2)O)O)O)O)O
DZ	(+)-catechin	CA12	771	c1cc(c(cc1[C@@H]2[C@H](Cc3c(cc(cc3O2)O)O)O)O)O
DZ	(+)-catechin	CAT	847	c1cc(c(cc1[C@@H]2[C@H](Cc3c(cc(cc3O2)O)O)O)O)O
DZ	(+)-catechin	CAT	847	c1cc(c(cc1[C@@H]2[C@H](Cc3c(cc(cc3O2)O)O)O)O)O
DZ	(+)-catechin	CEL	1056	c1cc(c(cc1[C@@H]2[C@H](Cc3c(cc(cc3O2)O)O)O)O)O
DZ	(+)-catechin	COMT	1312	c1cc(c(cc1[C@@H]2[C@H](Cc3c(cc(cc3O2)O)O)O)O)O
DZ	(+)-catechin	CTLA4	1493	c1cc(c(cc1[C@@H]2[C@H](Cc3c(cc(cc3O2)O)O)O)O)O
DZ	(+)-catechin	NQO1	1728	c1cc(c(cc1[C@@H]2[C@H](Cc3c(cc(cc3O2)O)O)O)O)O
DZ	(+)-catechin	DNMT1	1786	c1cc(c(cc1[C@@H]2[C@H](Cc3c(cc(cc3O2)O)O)O)O)O
DZ	(+)-catechin	DPEP1	1800	c1cc(c(cc1[C@@H]2[C@H](Cc3c(cc(cc3O2)O)O)O)O)O
DZ	(+)-catechin	ERH	2079	c1cc(c(cc1[C@@H]2[C@H](Cc3c(cc(cc3O2)O)O)O)O)O
DZ	(+)-catechin	FASN	2194	c1cc(c(cc1[C@@H]2[C@H](Cc3c(cc(cc3O2)O)O)O)O)O
DZ	(+)-catechin	FASN	2194	c1cc(c(cc1[C@@H]2[C@H](Cc3c(cc(cc3O2)O)O)O)O)O
DZ	(+)-catechin	MTOR	2475	c1cc(c(cc1[C@@H]2[C@H](Cc3c(cc(cc3O2)O)O)O)O)O
DZ	(+)-catechin	HAS2	3037	c1cc(c(cc1[C@@H]2[C@H](Cc3c(cc(cc3O2)O)O)O)O)O
DZ	(+)-catechin	HBA1	3039	c1cc(c(cc1[C@@H]2[C@H](Cc3c(cc(cc3O2)O)O)O)O)O
DZ	(+)-catechin	HBA2	3040	c1cc(c(cc1[C@@H]2[C@H](Cc3c(cc(cc3O2)O)O)O)O)O
DZ	(+)-catechin	HBM	3042	c1cc(c(cc1[C@@H]2[C@H](Cc3c(cc(cc3O2)O)O)O)O)O
DZ	(+)-catechin	HBB	3043	c1cc(c(cc1[C@@H]2[C@H](Cc3c(cc(cc3O2)O)O)O)O)O
DZ	(+)-catechin	HBD	3045	c1cc(c(cc1[C@@H]2[C@H](Cc3c(cc(cc3O2)O)O)O)O)O
DZ	(+)-catechin	HBE1	3046	c1cc(c(cc1[C@@H]2[C@H](Cc3c(cc(cc3O2)O)O)O)O)O
DZ	(+)-catechin	HBG1	3047	c1cc(c(cc1[C@@H]2[C@H](Cc3c(cc(cc3O2)O)O)O)O)O
DZ	(+)-catechin	HBG2	3048	c1cc(c(cc1[C@@H]2[C@H](Cc3c(cc(cc3O2)O)O)O)O)O
DZ	(+)-catechin	HBQ1	3049	c1cc(c(cc1[C@@H]2[C@H](Cc3c(cc(cc3O2)O)O)O)O)O
DZ	(+)-catechin	HBZ	3050	c1cc(c(cc1[C@@H]2[C@H](Cc3c(cc(cc3O2)O)O)O)O)O
DZ	(+)-catechin	INS	3630	c1cc(c(cc1[C@@H]2[C@H](Cc3c(cc(cc3O2)O)O)O)O)O
DZ	(+)-catechin	LOX	4015	c1cc(c(cc1[C@@H]2[C@H](Cc3c(cc(cc3O2)O)O)O)O)O
DZ	(+)-catechin	NOS3	4846	c1cc(c(cc1[C@@H]2[C@H](Cc3c(cc(cc3O2)O)O)O)O)O
DZ	(+)-catechin	SERPINE1	5054	c1cc(c(cc1[C@@H]2[C@H](Cc3c(cc(cc3O2)O)O)O)O)O
DZ	(+)-catechin	ABCB1	5243	c1cc(c(cc1[C@@H]2[C@H](Cc3c(cc(cc3O2)O)O)O)O)O
DZ	(+)-catechin	PPARG	5468	c1cc(c(cc1[C@@H]2[C@H](Cc3c(cc(cc3O2)O)O)O)O)O
DZ	(+)-catechin	PPOX	5498	c1cc(c(cc1[C@@H]2[C@H](Cc3c(cc(cc3O2)O)O)O)O)O
DZ	(+)-catechin	MAPK1	5594	c1cc(c(cc1[C@@H]2[C@H](Cc3c(cc(cc3O2)O)O)O)O)O
DZ	(+)-catechin	RARB	5915	c1cc(c(cc1[C@@H]2[C@H](Cc3c(cc(cc3O2)O)O)O)O)O
DZ	(+)-catechin	SLC16A1	6566	c1cc(c(cc1[C@@H]2[C@H](Cc3c(cc(cc3O2)O)O)O)O)O
DZ	(+)-catechin	SOD2	6648	c1cc(c(cc1[C@@H]2[C@H](Cc3c(cc(cc3O2)O)O)O)O)O
DZ	(+)-catechin	SORD	6652	c1cc(c(cc1[C@@H]2[C@H](Cc3c(cc(cc3O2)O)O)O)O)O
DZ	(+)-catechin	TNF	7124	c1cc(c(cc1[C@@H]2[C@H](Cc3c(cc(cc3O2)O)O)O)O)O
DZ	(+)-catechin	TOP2A	7153	c1cc(c(cc1[C@@H]2[C@H](Cc3c(cc(cc3O2)O)O)O)O)O
DZ	(+)-catechin	TOP2B	7155	c1cc(c(cc1[C@@H]2[C@H](Cc3c(cc(cc3O2)O)O)O)O)O
DZ	(+)-catechin	TYR	7299	c1cc(c(cc1[C@@H]2[C@H](Cc3c(cc(cc3O2)O)O)O)O)O
DZ	(+)-catechin	TYRL	7300	c1cc(c(cc1[C@@H]2[C@H](Cc3c(cc(cc3O2)O)O)O)O)O
DZ	(+)-catechin	KLF7	8609	c1cc(c(cc1[C@@H]2[C@H](Cc3c(cc(cc3O2)O)O)O)O)O
DZ	(+)-catechin	CA5B	11238	c1cc(c(cc1[C@@H]2[C@H](Cc3c(cc(cc3O2)O)O)O)O)O
DZ	(+)-catechin	OSTF1	26578	c1cc(c(cc1[C@@H]2[C@H](Cc3c(cc(cc3O2)O)O)O)O)O
DZ	(+)-catechin	LIME1	54923	c1cc(c(cc1[C@@H]2[C@H](Cc3c(cc(cc3O2)O)O)O)O)O
DZ	(+)-catechin	CALCOCO1	57658	c1cc(c(cc1[C@@H]2[C@H](Cc3c(cc(cc3O2)O)O)O)O)O
DZ	(+)-catechin	ARSH	347527	c1cc(c(cc1[C@@H]2[C@H](Cc3c(cc(cc3O2)O)O)O)O)O
DZ	alphitolic acid	GLI1	2735	CC(=C)[C@@H]1CC[C@]2([C@H]1[C@H]3CC[C@H]4[C@]([C@@]3(CC2)C)(CC[C@@H]5[C@@]4(C[C@H]([C@@H](C5(C)C)O)O)C)C)C(=O)[O-]
DZ	alphitolic acid	GLI1	2735	CC(=C)[C@@H]1CC[C@]2([C@H]1[C@H]3CC[C@H]4[C@]([C@@]3(CC2)C)(CC[C@@H]5[C@@]4(C[C@H]([C@@H](C5(C)C)O)O)C)C)C(=O)[O-]
DZ	asimilobine	TH	7054	COC1=C(C=C2CCNC3C2=C1C4=CC=CC=C4C3)O
DZ	berberine	ACHE	43	COc1ccc2cc-3[n+](cc2c1OC)CCc4c3cc5c(c4)OCO5
DZ	berberine	PARP1	142	COc1ccc2cc-3[n+](cc2c1OC)CCc4c3cc5c(c4)OCO5
DZ	berberine	ADRA2B	151	COc1ccc2cc-3[n+](cc2c1OC)CCc4c3cc5c(c4)OCO5
DZ	berberine	ADRA2C	152	COc1ccc2cc-3[n+](cc2c1OC)CCc4c3cc5c(c4)OCO5
DZ	berberine	AHR	196	COc1ccc2cc-3[n+](cc2c1OC)CCc4c3cc5c(c4)OCO5
DZ	berberine	AKR1B1	231	COc1ccc2cc-3[n+](cc2c1OC)CCc4c3cc5c(c4)OCO5
DZ	berberine	ATP5G2	517	COc1ccc2cc-3[n+](cc2c1OC)CCc4c3cc5c(c4)OCO5
DZ	berberine	ATR	545	COc1ccc2cc-3[n+](cc2c1OC)CCc4c3cc5c(c4)OCO5
DZ	berberine	CCND1	595	COc1ccc2cc-3[n+](cc2c1OC)CCc4c3cc5c(c4)OCO5
DZ	berberine	CASP3	836	COc1ccc2cc-3[n+](cc2c1OC)CCc4c3cc5c(c4)OCO5
DZ	berberine	CASP8	841	COc1ccc2cc-3[n+](cc2c1OC)CCc4c3cc5c(c4)OCO5
DZ	berberine	CASP9	842	COc1ccc2cc-3[n+](cc2c1OC)CCc4c3cc5c(c4)OCO5
DZ	berberine	CDKN1A	1026	COc1ccc2cc-3[n+](cc2c1OC)CCc4c3cc5c(c4)OCO5
DZ	berberine	CDKN1C	1028	COc1ccc2cc-3[n+](cc2c1OC)CCc4c3cc5c(c4)OCO5
DZ	berberine	CHRM1	1128	COc1ccc2cc-3[n+](cc2c1OC)CCc4c3cc5c(c4)OCO5
DZ	berberine	MAPK14	1432	COc1ccc2cc-3[n+](cc2c1OC)CCc4c3cc5c(c4)OCO5
DZ	berberine	CTSB	1508	COc1ccc2cc-3[n+](cc2c1OC)CCc4c3cc5c(c4)OCO5
DZ	berberine	CYP1A1	1543	COc1ccc2cc-3[n+](cc2c1OC)CCc4c3cc5c(c4)OCO5
DZ	berberine	DECR1	1666	COc1ccc2cc-3[n+](cc2c1OC)CCc4c3cc5c(c4)OCO5
DZ	berberine	DPP4	1803	COc1ccc2cc-3[n+](cc2c1OC)CCc4c3cc5c(c4)OCO5
DZ	berberine	FEN1	2237	COc1ccc2cc-3[n+](cc2c1OC)CCc4c3cc5c(c4)OCO5
DZ	berberine	FOXO1	2308	COc1ccc2cc-3[n+](cc2c1OC)CCc4c3cc5c(c4)OCO5
DZ	berberine	FN1	2335	COc1ccc2cc-3[n+](cc2c1OC)CCc4c3cc5c(c4)OCO5
DZ	berberine	GATA2	2624	COc1ccc2cc-3[n+](cc2c1OC)CCc4c3cc5c(c4)OCO5
DZ	berberine	GCG	2641	COc1ccc2cc-3[n+](cc2c1OC)CCc4c3cc5c(c4)OCO5
DZ	berberine	HMOX1	3162	COc1ccc2cc-3[n+](cc2c1OC)CCc4c3cc5c(c4)OCO5
DZ	berberine	HTR2B	3357	COc1ccc2cc-3[n+](cc2c1OC)CCc4c3cc5c(c4)OCO5
DZ	berberine	HTR4	3360	COc1ccc2cc-3[n+](cc2c1OC)CCc4c3cc5c(c4)OCO5
DZ	berberine	IL12B	3593	COc1ccc2cc-3[n+](cc2c1OC)CCc4c3cc5c(c4)OCO5
DZ	berberine	INS	3630	COc1ccc2cc-3[n+](cc2c1OC)CCc4c3cc5c(c4)OCO5
DZ	berberine	INSR	3643	COc1ccc2cc-3[n+](cc2c1OC)CCc4c3cc5c(c4)OCO5
DZ	berberine	JUN	3725	COc1ccc2cc-3[n+](cc2c1OC)CCc4c3cc5c(c4)OCO5
DZ	berberine	KCNQ1	3784	COc1ccc2cc-3[n+](cc2c1OC)CCc4c3cc5c(c4)OCO5
DZ	berberine	LDLR	3949	COc1ccc2cc-3[n+](cc2c1OC)CCc4c3cc5c(c4)OCO5
DZ	berberine	LPL	4023	COc1ccc2cc-3[n+](cc2c1OC)CCc4c3cc5c(c4)OCO5
DZ	berberine	NTG2	4292	COc1ccc2cc-3[n+](cc2c1OC)CCc4c3cc5c(c4)OCO5
DZ	berberine	MMP1	4312	COc1ccc2cc-3[n+](cc2c1OC)CCc4c3cc5c(c4)OCO5
DZ	berberine	MMP2	4313	COc1ccc2cc-3[n+](cc2c1OC)CCc4c3cc5c(c4)OCO5
DZ	berberine	MMP9	4318	COc1ccc2cc-3[n+](cc2c1OC)CCc4c3cc5c(c4)OCO5
DZ	berberine	MSH2	4436	COc1ccc2cc-3[n+](cc2c1OC)CCc4c3cc5c(c4)OCO5
DZ	berberine	NME1	4830	COc1ccc2cc-3[n+](cc2c1OC)CCc4c3cc5c(c4)OCO5
DZ	berberine	NRF1	4899	COc1ccc2cc-3[n+](cc2c1OC)CCc4c3cc5c(c4)OCO5
DZ	berberine	OGG1	4968	COc1ccc2cc-3[n+](cc2c1OC)CCc4c3cc5c(c4)OCO5
DZ	berberine	PLAU	5328	COc1ccc2cc-3[n+](cc2c1OC)CCc4c3cc5c(c4)OCO5
DZ	berberine	RAD27	5423	COc1ccc2cc-3[n+](cc2c1OC)CCc4c3cc5c(c4)OCO5
DZ	berberine	PON1	5444	COc1ccc2cc-3[n+](cc2c1OC)CCc4c3cc5c(c4)OCO5
DZ	berberine	PPARG	5468	COc1ccc2cc-3[n+](cc2c1OC)CCc4c3cc5c(c4)OCO5
DZ	berberine	PTGER4	5734	COc1ccc2cc-3[n+](cc2c1OC)CCc4c3cc5c(c4)OCO5
DZ	berberine	PTGS2	5743	COc1ccc2cc-3[n+](cc2c1OC)CCc4c3cc5c(c4)OCO5
DZ	berberine	PTPN1	5770	COc1ccc2cc-3[n+](cc2c1OC)CCc4c3cc5c(c4)OCO5
DZ	berberine	RAD51	5888	COc1ccc2cc-3[n+](cc2c1OC)CCc4c3cc5c(c4)OCO5
DZ	berberine	REV3L	5980	COc1ccc2cc-3[n+](cc2c1OC)CCc4c3cc5c(c4)OCO5
DZ	berberine	RPS3	6188	COc1ccc2cc-3[n+](cc2c1OC)CCc4c3cc5c(c4)OCO5
DZ	berberine	SLC6A4	6532	COc1ccc2cc-3[n+](cc2c1OC)CCc4c3cc5c(c4)OCO5
DZ	berberine	SOD2	6648	COc1ccc2cc-3[n+](cc2c1OC)CCc4c3cc5c(c4)OCO5
DZ	berberine	STK11	6794	COc1ccc2cc-3[n+](cc2c1OC)CCc4c3cc5c(c4)OCO5
DZ	berberine	TNF	7124	COc1ccc2cc-3[n+](cc2c1OC)CCc4c3cc5c(c4)OCO5
DZ	berberine	TNF	7124	COc1ccc2cc-3[n+](cc2c1OC)CCc4c3cc5c(c4)OCO5
DZ	berberine	TNFRSF1A	7132	COc1ccc2cc-3[n+](cc2c1OC)CCc4c3cc5c(c4)OCO5
DZ	berberine	TOP1	7150	COc1ccc2cc-3[n+](cc2c1OC)CCc4c3cc5c(c4)OCO5
DZ	berberine	TOP1	7150	COc1ccc2cc-3[n+](cc2c1OC)CCc4c3cc5c(c4)OCO5
DZ	berberine	TP53	7157	COc1ccc2cc-3[n+](cc2c1OC)CCc4c3cc5c(c4)OCO5
DZ	berberine	UCP2	7351	COc1ccc2cc-3[n+](cc2c1OC)CCc4c3cc5c(c4)OCO5
DZ	berberine	UNG1	7374	COc1ccc2cc-3[n+](cc2c1OC)CCc4c3cc5c(c4)OCO5
DZ	berberine	XRCC2	7516	COc1ccc2cc-3[n+](cc2c1OC)CCc4c3cc5c(c4)OCO5
DZ	berberine	EIF3F	8665	COc1ccc2cc-3[n+](cc2c1OC)CCc4c3cc5c(c4)OCO5
DZ	berberine	TRADD	8717	COc1ccc2cc-3[n+](cc2c1OC)CCc4c3cc5c(c4)OCO5
DZ	berberine	SIGMAR1	10280	COc1ccc2cc-3[n+](cc2c1OC)CCc4c3cc5c(c4)OCO5
DZ	berberine	APEX2	27301	COc1ccc2cc-3[n+](cc2c1OC)CCc4c3cc5c(c4)OCO5
DZ	berberine	TDP1	55775	COc1ccc2cc-3[n+](cc2c1OC)CCc4c3cc5c(c4)OCO5
DZ	berberine	MAG1	84803	COc1ccc2cc-3[n+](cc2c1OC)CCc4c3cc5c(c4)OCO5
DZ	berberine	PCSK9	255738	COc1ccc2cc-3[n+](cc2c1OC)CCc4c3cc5c(c4)OCO5
DZ	berberine	POL30	852385	COc1ccc2cc-3[n+](cc2c1OC)CCc4c3cc5c(c4)OCO5
DZ	betulin	ACHE	43	CC(=C)[C@@H]1CC[C@]2([C@H]1[C@H]3CC[C@@H]4[C@]5(CC[C@@H](C([C@@H]5CC[C@]4([C@@]3(CC2)C)C)(C)C)O)C)CO
DZ	betulin	PRKCB	5579	CC(=C)[C@@H]1CC[C@]2([C@H]1[C@H]3CC[C@@H]4[C@]5(CC[C@@H](C([C@@H]5CC[C@]4([C@@]3(CC2)C)C)(C)C)O)C)CO
DZ	betulin	PRKCE	5581	CC(=C)[C@@H]1CC[C@]2([C@H]1[C@H]3CC[C@@H]4[C@]5(CC[C@@H](C([C@@H]5CC[C@]4([C@@]3(CC2)C)C)(C)C)O)C)CO
DZ	betulin	PTGS2	5743	CC(=C)[C@@H]1CC[C@]2([C@H]1[C@H]3CC[C@@H]4[C@]5(CC[C@@H](C([C@@H]5CC[C@]4([C@@]3(CC2)C)C)(C)C)O)C)CO
DZ	betulin	PYGM	5837	CC(=C)[C@@H]1CC[C@]2([C@H]1[C@H]3CC[C@@H]4[C@]5(CC[C@@H](C([C@@H]5CC[C@]4([C@@]3(CC2)C)C)(C)C)O)C)CO
DZ	betulin	TOP2A	7153	CC(=C)[C@@H]1CC[C@]2([C@H]1[C@H]3CC[C@@H]4[C@]5(CC[C@@H](C([C@@H]5CC[C@]4([C@@]3(CC2)C)C)(C)C)O)C)CO
DZ	betulin	NR1H4	9971	CC(=C)[C@@H]1CC[C@]2([C@H]1[C@H]3CC[C@@H]4[C@]5(CC[C@@H](C([C@@H]5CC[C@]4([C@@]3(CC2)C)C)(C)C)O)C)CO
DZ	betulin	CCT4	10575	CC(=C)[C@@H]1CC[C@]2([C@H]1[C@H]3CC[C@@H]4[C@]5(CC[C@@H](C([C@@H]5CC[C@]4([C@@]3(CC2)C)C)(C)C)O)C)CO
DZ	betulinic acid / betulic acid	ACTA1	58	CC(=C)[C@@H]1CC[C@]2([C@H]1[C@H]3CC[C@@H]4[C@]5(CC[C@@H](C([C@@H]5CC[C@]4([C@@]3(CC2)C)C)(C)C)O)C)C(=O)[O-]
DZ	betulinic acid / betulic acid	ACTA2	59	CC(=C)[C@@H]1CC[C@]2([C@H]1[C@H]3CC[C@@H]4[C@]5(CC[C@@H](C([C@@H]5CC[C@]4([C@@]3(CC2)C)C)(C)C)O)C)C(=O)[O-]
DZ	betulinic acid / betulic acid	PARP1	142	CC(=C)[C@@H]1CC[C@]2([C@H]1[C@H]3CC[C@@H]4[C@]5(CC[C@@H](C([C@@H]5CC[C@]4([C@@]3(CC2)C)C)(C)C)O)C)C(=O)[O-]
DZ	betulinic acid / betulic acid	PARP1	142	CC(=C)[C@@H]1CC[C@]2([C@H]1[C@H]3CC[C@@H]4[C@]5(CC[C@@H](C([C@@H]5CC[C@]4([C@@]3(CC2)C)C)(C)C)O)C)C(=O)[O-]
DZ	betulinic acid / betulic acid	AKT1	207	CC(=C)[C@@H]1CC[C@]2([C@H]1[C@H]3CC[C@@H]4[C@]5(CC[C@@H](C([C@@H]5CC[C@]4([C@@]3(CC2)C)C)(C)C)O)C)C(=O)[O-]
DZ	betulinic acid / betulic acid	AKT1	207	CC(=C)[C@@H]1CC[C@]2([C@H]1[C@H]3CC[C@@H]4[C@]5(CC[C@@H](C([C@@H]5CC[C@]4([C@@]3(CC2)C)C)(C)C)O)C)C(=O)[O-]
DZ	betulinic acid / betulic acid	ANXA5	308	CC(=C)[C@@H]1CC[C@]2([C@H]1[C@H]3CC[C@@H]4[C@]5(CC[C@@H](C([C@@H]5CC[C@]4([C@@]3(CC2)C)C)(C)C)O)C)C(=O)[O-]
DZ	betulinic acid / betulic acid	BIRC5	332	CC(=C)[C@@H]1CC[C@]2([C@H]1[C@H]3CC[C@@H]4[C@]5(CC[C@@H](C([C@@H]5CC[C@]4([C@@]3(CC2)C)C)(C)C)O)C)C(=O)[O-]
DZ	betulinic acid / betulic acid	BIRC5	332	CC(=C)[C@@H]1CC[C@]2([C@H]1[C@H]3CC[C@@H]4[C@]5(CC[C@@H](C([C@@H]5CC[C@]4([C@@]3(CC2)C)C)(C)C)O)C)C(=O)[O-]
DZ	betulinic acid / betulic acid	BIRC5	332	CC(=C)[C@@H]1CC[C@]2([C@H]1[C@H]3CC[C@@H]4[C@]5(CC[C@@H](C([C@@H]5CC[C@]4([C@@]3(CC2)C)C)(C)C)O)C)C(=O)[O-]
DZ	betulinic acid / betulic acid	FAS	355	CC(=C)[C@@H]1CC[C@]2([C@H]1[C@H]3CC[C@@H]4[C@]5(CC[C@@H](C([C@@H]5CC[C@]4([C@@]3(CC2)C)C)(C)C)O)C)C(=O)[O-]
DZ	betulinic acid / betulic acid	BAX	581	CC(=C)[C@@H]1CC[C@]2([C@H]1[C@H]3CC[C@@H]4[C@]5(CC[C@@H](C([C@@H]5CC[C@]4([C@@]3(CC2)C)C)(C)C)O)C)C(=O)[O-]
DZ	betulinic acid / betulic acid	CCND1	595	CC(=C)[C@@H]1CC[C@]2([C@H]1[C@H]3CC[C@@H]4[C@]5(CC[C@@H](C([C@@H]5CC[C@]4([C@@]3(CC2)C)C)(C)C)O)C)C(=O)[O-]
DZ	betulinic acid / betulic acid	CCND1	595	CC(=C)[C@@H]1CC[C@]2([C@H]1[C@H]3CC[C@@H]4[C@]5(CC[C@@H](C([C@@H]5CC[C@]4([C@@]3(CC2)C)C)(C)C)O)C)C(=O)[O-]
DZ	betulinic acid / betulic acid	BCL2	596	CC(=C)[C@@H]1CC[C@]2([C@H]1[C@H]3CC[C@@H]4[C@]5(CC[C@@H](C([C@@H]5CC[C@]4([C@@]3(CC2)C)C)(C)C)O)C)C(=O)[O-]
DZ	betulinic acid / betulic acid	BCL2	596	CC(=C)[C@@H]1CC[C@]2([C@H]1[C@H]3CC[C@@H]4[C@]5(CC[C@@H](C([C@@H]5CC[C@]4([C@@]3(CC2)C)C)(C)C)O)C)C(=O)[O-]
DZ	betulinic acid / betulic acid	BCL2L1	598	CC(=C)[C@@H]1CC[C@]2([C@H]1[C@H]3CC[C@@H]4[C@]5(CC[C@@H](C([C@@H]5CC[C@]4([C@@]3(CC2)C)C)(C)C)O)C)C(=O)[O-]
DZ	betulinic acid / betulic acid	CASP3	836	CC(=C)[C@@H]1CC[C@]2([C@H]1[C@H]3CC[C@@H]4[C@]5(CC[C@@H](C([C@@H]5CC[C@]4([C@@]3(CC2)C)C)(C)C)O)C)C(=O)[O-]
DZ	betulinic acid / betulic acid	CASP7	840	CC(=C)[C@@H]1CC[C@]2([C@H]1[C@H]3CC[C@@H]4[C@]5(CC[C@@H](C([C@@H]5CC[C@]4([C@@]3(CC2)C)C)(C)C)O)C)C(=O)[O-]
DZ	betulinic acid / betulic acid	EGFR	1956	CC(=C)[C@@H]1CC[C@]2([C@H]1[C@H]3CC[C@@H]4[C@]5(CC[C@@H](C([C@@H]5CC[C@]4([C@@]3(CC2)C)C)(C)C)O)C)C(=O)[O-]
DZ	betulinic acid / betulic acid	EGFR	1956	CC(=C)[C@@H]1CC[C@]2([C@H]1[C@H]3CC[C@@H]4[C@]5(CC[C@@H](C([C@@H]5CC[C@]4([C@@]3(CC2)C)C)(C)C)O)C)C(=O)[O-]
DZ	betulinic acid / betulic acid	EGFR	1956	CC(=C)[C@@H]1CC[C@]2([C@H]1[C@H]3CC[C@@H]4[C@]5(CC[C@@H](C([C@@H]5CC[C@]4([C@@]3(CC2)C)C)(C)C)O)C)C(=O)[O-]
DZ	betulinic acid / betulic acid	CFHR2	3080	CC(=C)[C@@H]1CC[C@]2([C@H]1[C@H]3CC[C@@H]4[C@]5(CC[C@@H](C([C@@H]5CC[C@]4([C@@]3(CC2)C)C)(C)C)O)C)C(=O)[O-]
DZ	betulinic acid / betulic acid	IL6	3569	CC(=C)[C@@H]1CC[C@]2([C@H]1[C@H]3CC[C@@H]4[C@]5(CC[C@@H](C([C@@H]5CC[C@]4([C@@]3(CC2)C)C)(C)C)O)C)C(=O)[O-]
DZ	betulinic acid / betulic acid	IL6	3569	CC(=C)[C@@H]1CC[C@]2([C@H]1[C@H]3CC[C@@H]4[C@]5(CC[C@@H](C([C@@H]5CC[C@]4([C@@]3(CC2)C)C)(C)C)O)C)C(=O)[O-]
DZ	betulinic acid / betulic acid	NOS1	4842	CC(=C)[C@@H]1CC[C@]2([C@H]1[C@H]3CC[C@@H]4[C@]5(CC[C@@H](C([C@@H]5CC[C@]4([C@@]3(CC2)C)C)(C)C)O)C)C(=O)[O-]
DZ	betulinic acid / betulic acid	NOS3	4846	CC(=C)[C@@H]1CC[C@]2([C@H]1[C@H]3CC[C@@H]4[C@]5(CC[C@@H](C([C@@H]5CC[C@]4([C@@]3(CC2)C)C)(C)C)O)C)C(=O)[O-]
DZ	betulinic acid / betulic acid	NOS3	4846	CC(=C)[C@@H]1CC[C@]2([C@H]1[C@H]3CC[C@@H]4[C@]5(CC[C@@H](C([C@@H]5CC[C@]4([C@@]3(CC2)C)C)(C)C)O)C)C(=O)[O-]
DZ	betulinic acid / betulic acid	NOS3	4846	CC(=C)[C@@H]1CC[C@]2([C@H]1[C@H]3CC[C@@H]4[C@]5(CC[C@@H](C([C@@H]5CC[C@]4([C@@]3(CC2)C)C)(C)C)O)C)C(=O)[O-]
DZ	betulinic acid / betulic acid	OXA1L	5018	CC(=C)[C@@H]1CC[C@]2([C@H]1[C@H]3CC[C@@H]4[C@]5(CC[C@@H](C([C@@H]5CC[C@]4([C@@]3(CC2)C)C)(C)C)O)C)C(=O)[O-]
DZ	betulinic acid / betulic acid	PNLIP	5406	CC(=C)[C@@H]1CC[C@]2([C@H]1[C@H]3CC[C@@H]4[C@]5(CC[C@@H](C([C@@H]5CC[C@]4([C@@]3(CC2)C)C)(C)C)O)C)C(=O)[O-]
DZ	betulinic acid / betulic acid	POLB	5423	CC(=C)[C@@H]1CC[C@]2([C@H]1[C@H]3CC[C@@H]4[C@]5(CC[C@@H](C([C@@H]5CC[C@]4([C@@]3(CC2)C)C)(C)C)O)C)C(=O)[O-]
DZ	betulinic acid / betulic acid	POLB	5423	CC(=C)[C@@H]1CC[C@]2([C@H]1[C@H]3CC[C@@H]4[C@]5(CC[C@@H](C([C@@H]5CC[C@]4([C@@]3(CC2)C)C)(C)C)O)C)C(=O)[O-]
DZ	betulinic acid / betulic acid	MAPK1	5594	CC(=C)[C@@H]1CC[C@]2([C@H]1[C@H]3CC[C@@H]4[C@]5(CC[C@@H](C([C@@H]5CC[C@]4([C@@]3(CC2)C)C)(C)C)O)C)C(=O)[O-]
DZ	betulinic acid / betulic acid	MAPK1	5594	CC(=C)[C@@H]1CC[C@]2([C@H]1[C@H]3CC[C@@H]4[C@]5(CC[C@@H](C([C@@H]5CC[C@]4([C@@]3(CC2)C)C)(C)C)O)C)C(=O)[O-]
DZ	betulinic acid / betulic acid	MAPK1	5594	CC(=C)[C@@H]1CC[C@]2([C@H]1[C@H]3CC[C@@H]4[C@]5(CC[C@@H](C([C@@H]5CC[C@]4([C@@]3(CC2)C)C)(C)C)O)C)C(=O)[O-]
DZ	betulinic acid / betulic acid	MAPK3	5595	CC(=C)[C@@H]1CC[C@]2([C@H]1[C@H]3CC[C@@H]4[C@]5(CC[C@@H](C([C@@H]5CC[C@]4([C@@]3(CC2)C)C)(C)C)O)C)C(=O)[O-]
DZ	betulinic acid / betulic acid	PTGER1	5731	CC(=C)[C@@H]1CC[C@]2([C@H]1[C@H]3CC[C@@H]4[C@]5(CC[C@@H](C([C@@H]5CC[C@]4([C@@]3(CC2)C)C)(C)C)O)C)C(=O)[O-]
DZ	betulinic acid / betulic acid	PTGER2	5732	CC(=C)[C@@H]1CC[C@]2([C@H]1[C@H]3CC[C@@H]4[C@]5(CC[C@@H](C([C@@H]5CC[C@]4([C@@]3(CC2)C)C)(C)C)O)C)C(=O)[O-]
DZ	betulinic acid / betulic acid	PTGER3	5733	CC(=C)[C@@H]1CC[C@]2([C@H]1[C@H]3CC[C@@H]4[C@]5(CC[C@@H](C([C@@H]5CC[C@]4([C@@]3(CC2)C)C)(C)C)O)C)C(=O)[O-]
DZ	betulinic acid / betulic acid	PTGER4	5734	CC(=C)[C@@H]1CC[C@]2([C@H]1[C@H]3CC[C@@H]4[C@]5(CC[C@@H](C([C@@H]5CC[C@]4([C@@]3(CC2)C)C)(C)C)O)C)C(=O)[O-]
DZ	betulinic acid / betulic acid	PTGFR	5737	CC(=C)[C@@H]1CC[C@]2([C@H]1[C@H]3CC[C@@H]4[C@]5(CC[C@@H](C([C@@H]5CC[C@]4([C@@]3(CC2)C)C)(C)C)O)C)C(=O)[O-]
DZ	betulinic acid / betulic acid	PTGIR	5739	CC(=C)[C@@H]1CC[C@]2([C@H]1[C@H]3CC[C@@H]4[C@]5(CC[C@@H](C([C@@H]5CC[C@]4([C@@]3(CC2)C)C)(C)C)O)C)C(=O)[O-]
DZ	betulinic acid / betulic acid	PTPN6	5777	CC(=C)[C@@H]1CC[C@]2([C@H]1[C@H]3CC[C@@H]4[C@]5(CC[C@@H](C([C@@H]5CC[C@]4([C@@]3(CC2)C)C)(C)C)O)C)C(=O)[O-]
DZ	betulinic acid / betulic acid	PTPN6	5777	CC(=C)[C@@H]1CC[C@]2([C@H]1[C@H]3CC[C@@H]4[C@]5(CC[C@@H](C([C@@H]5CC[C@]4([C@@]3(CC2)C)C)(C)C)O)C)C(=O)[O-]
DZ	betulinic acid / betulic acid	SP1	6667	CC(=C)[C@@H]1CC[C@]2([C@H]1[C@H]3CC[C@@H]4[C@]5(CC[C@@H](C([C@@H]5CC[C@]4([C@@]3(CC2)C)C)(C)C)O)C)C(=O)[O-]
DZ	betulinic acid / betulic acid	TOP1	7150	CC(=C)[C@@H]1CC[C@]2([C@H]1[C@H]3CC[C@@H]4[C@]5(CC[C@@H](C([C@@H]5CC[C@]4([C@@]3(CC2)C)C)(C)C)O)C)C(=O)[O-]
DZ	betulinic acid / betulic acid	TOP1	7150	CC(=C)[C@@H]1CC[C@]2([C@H]1[C@H]3CC[C@@H]4[C@]5(CC[C@@H](C([C@@H]5CC[C@]4([C@@]3(CC2)C)C)(C)C)O)C)C(=O)[O-]
DZ	betulinic acid / betulic acid	TOP1	7150	CC(=C)[C@@H]1CC[C@]2([C@H]1[C@H]3CC[C@@H]4[C@]5(CC[C@@H](C([C@@H]5CC[C@]4([C@@]3(CC2)C)C)(C)C)O)C)C(=O)[O-]
DZ	betulinic acid / betulic acid	TOP2A	7153	CC(=C)[C@@H]1CC[C@]2([C@H]1[C@H]3CC[C@@H]4[C@]5(CC[C@@H](C([C@@H]5CC[C@]4([C@@]3(CC2)C)C)(C)C)O)C)C(=O)[O-]
DZ	betulinic acid / betulic acid	TOP2A	7153	CC(=C)[C@@H]1CC[C@]2([C@H]1[C@H]3CC[C@@H]4[C@]5(CC[C@@H](C([C@@H]5CC[C@]4([C@@]3(CC2)C)C)(C)C)O)C)C(=O)[O-]
DZ	betulinic acid / betulic acid	TP53	7157	CC(=C)[C@@H]1CC[C@]2([C@H]1[C@H]3CC[C@@H]4[C@]5(CC[C@@H](C([C@@H]5CC[C@]4([C@@]3(CC2)C)C)(C)C)O)C)C(=O)[O-]
DZ	betulinic acid / betulic acid	NR1H4	9971	CC(=C)[C@@H]1CC[C@]2([C@H]1[C@H]3CC[C@@H]4[C@]5(CC[C@@H](C([C@@H]5CC[C@]4([C@@]3(CC2)C)C)(C)C)O)C)C(=O)[O-]
DZ	betulinic acid / betulic acid	NR1H4	9971	CC(=C)[C@@H]1CC[C@]2([C@H]1[C@H]3CC[C@@H]4[C@]5(CC[C@@H](C([C@@H]5CC[C@]4([C@@]3(CC2)C)C)(C)C)O)C)C(=O)[O-]
DZ	betulinic acid / betulic acid	NR1H4	9971	CC(=C)[C@@H]1CC[C@]2([C@H]1[C@H]3CC[C@@H]4[C@]5(CC[C@@H](C([C@@H]5CC[C@]4([C@@]3(CC2)C)C)(C)C)O)C)C(=O)[O-]
DZ	betulinic acid / betulic acid	CCT4	10575	CC(=C)[C@@H]1CC[C@]2([C@H]1[C@H]3CC[C@@H]4[C@]5(CC[C@@H](C([C@@H]5CC[C@]4([C@@]3(CC2)C)C)(C)C)O)C)C(=O)[O-]
DZ	betulinic acid / betulic acid	CYCS	54205	CC(=C)[C@@H]1CC[C@]2([C@H]1[C@H]3CC[C@@H]4[C@]5(CC[C@@H](C([C@@H]5CC[C@]4([C@@]3(CC2)C)C)(C)C)O)C)C(=O)[O-]
DZ	betulinic acid / betulic acid	AKR1B10	57016	CC(=C)[C@@H]1CC[C@]2([C@H]1[C@H]3CC[C@@H]4[C@]5(CC[C@@H](C([C@@H]5CC[C@]4([C@@]3(CC2)C)C)(C)C)O)C)C(=O)[O-]
DZ	betulinic acid / betulic acid	PRDM16	63976	CC(=C)[C@@H]1CC[C@]2([C@H]1[C@H]3CC[C@@H]4[C@]5(CC[C@@H](C([C@@H]5CC[C@]4([C@@]3(CC2)C)C)(C)C)O)C)C(=O)[O-]
DZ	betulinic acid / betulic acid	PAGR1	79447	CC(=C)[C@@H]1CC[C@]2([C@H]1[C@H]3CC[C@@H]4[C@]5(CC[C@@H](C([C@@H]5CC[C@]4([C@@]3(CC2)C)C)(C)C)O)C)C(=O)[O-]
DZ	betulinic acid / betulic acid	MT4	84560	CC(=C)[C@@H]1CC[C@]2([C@H]1[C@H]3CC[C@@H]4[C@]5(CC[C@@H](C([C@@H]5CC[C@]4([C@@]3(CC2)C)C)(C)C)O)C)C(=O)[O-]
DZ	betulinic acid / betulic acid	GPBAR1	151306	CC(=C)[C@@H]1CC[C@]2([C@H]1[C@H]3CC[C@@H]4[C@]5(CC[C@@H](C([C@@H]5CC[C@]4([C@@]3(CC2)C)C)(C)C)O)C)C(=O)[O-]
DZ	betulinic acid / betulic acid	GPBAR1	151306	CC(=C)[C@@H]1CC[C@]2([C@H]1[C@H]3CC[C@@H]4[C@]5(CC[C@@H](C([C@@H]5CC[C@]4([C@@]3(CC2)C)C)(C)C)O)C)C(=O)[O-]
DZ	betulinic acid / betulic acid	GPBAR1	151306	CC(=C)[C@@H]1CC[C@]2([C@H]1[C@H]3CC[C@@H]4[C@]5(CC[C@@H](C([C@@H]5CC[C@]4([C@@]3(CC2)C)C)(C)C)O)C)C(=O)[O-]
DZ	betulonic acid/liquidambaric acid/Betunolic Acid	NR1H4	9971	CC(=C)[C@@H]1CC[C@]2([C@H]1[C@H]3CC[C@@H]4[C@]5(CCC(=O)C([C@@H]5CC[C@]4([C@@]3(CC2)C)C)(C)C)C)C(=O)[O-]
DZ	betulonic acid/liquidambaric acid/Betunolic Acid	PRDM16	63976	CC(=C)[C@@H]1CC[C@]2([C@H]1[C@H]3CC[C@@H]4[C@]5(CCC(=O)C([C@@H]5CC[C@]4([C@@]3(CC2)C)C)(C)C)C)C(=O)[O-]
DZ	betulonic acid/liquidambaric acid/Betunolic Acid	MCEE	84693	CC(=C)[C@@H]1CC[C@]2([C@H]1[C@H]3CC[C@@H]4[C@]5(CCC(=O)C([C@@H]5CC[C@]4([C@@]3(CC2)C)C)(C)C)C)C(=O)[O-]
DZ	catechol	ACHE	43	c1ccc(c(c1)O)O
DZ	catechol	ADORA1	134	c1ccc(c(c1)O)O
DZ	catechol	ADORA2A	135	c1ccc(c(c1)O)O
DZ	catechol	ADORA2A	135	c1ccc(c(c1)O)O
DZ	catechol	ADORA3	140	c1ccc(c(c1)O)O
DZ	catechol	ADRA1D	146	c1ccc(c(c1)O)O
DZ	catechol	ADRA1B	147	c1ccc(c(c1)O)O
DZ	catechol	ADRA2A	150	c1ccc(c(c1)O)O
DZ	catechol	ADRA2B	151	c1ccc(c(c1)O)O
DZ	catechol	ADRA2C	152	c1ccc(c(c1)O)O
DZ	catechol	ADRB1	153	c1ccc(c(c1)O)O
DZ	catechol	ADRB2	154	c1ccc(c(c1)O)O
DZ	catechol	ADRB3	155	c1ccc(c(c1)O)O
DZ	catechol	AGTR2	186	c1ccc(c(c1)O)O
DZ	catechol	AKR1B1	231	c1ccc(c(c1)O)O
DZ	catechol	ALOX5	240	c1ccc(c(c1)O)O
DZ	catechol	ALOX15	246	c1ccc(c(c1)O)O
DZ	catechol	ALOX15	246	c1ccc(c(c1)O)O
DZ	catechol	AR	367	c1ccc(c(c1)O)O
DZ	catechol	AVPR1A	552	c1ccc(c(c1)O)O
DZ	catechol	BDKRB2	624	c1ccc(c(c1)O)O
DZ	catechol	ca1	759	c1ccc(c(c1)O)O
DZ	catechol	CA2	760	c1ccc(c(c1)O)O
DZ	catechol	ca2	760	c1ccc(c(c1)O)O
DZ	catechol	ca3	761	c1ccc(c(c1)O)O
DZ	catechol	ca3	761	c1ccc(c(c1)O)O
DZ	catechol	CA4	762	c1ccc(c(c1)O)O
DZ	catechol	CA5A	763	c1ccc(c(c1)O)O
DZ	catechol	ca6	765	c1ccc(c(c1)O)O
DZ	catechol	ca7	766	c1ccc(c(c1)O)O
DZ	catechol	ca9	768	c1ccc(c(c1)O)O
DZ	catechol	CA12	771	c1ccc(c(c1)O)O
DZ	catechol	ca12	771	c1ccc(c(c1)O)O
DZ	catechol	CALCR	799	c1ccc(c(c1)O)O
DZ	catechol	CASP1	834	c1ccc(c(c1)O)O
DZ	catechol	CASP3	836	c1ccc(c(c1)O)O
DZ	catechol	CASP7	840	c1ccc(c(c1)O)O
DZ	catechol	CCKAR	886	c1ccc(c(c1)O)O
DZ	catechol	CHRM1	1128	c1ccc(c(c1)O)O
DZ	catechol	CHRM2	1129	c1ccc(c(c1)O)O
DZ	catechol	CHRM3	1131	c1ccc(c(c1)O)O
DZ	catechol	CHRM4	1132	c1ccc(c(c1)O)O
DZ	catechol	CHRM5	1133	c1ccc(c(c1)O)O
DZ	catechol	CCR4	1233	c1ccc(c(c1)O)O
DZ	catechol	CCR5	1234	c1ccc(c(c1)O)O
DZ	catechol	CNR1	1268	c1ccc(c(c1)O)O
DZ	catechol	COMT	1312	c1ccc(c(c1)O)O
DZ	catechol	COMT	1312	c1ccc(c(c1)O)O
DZ	catechol	MAPK14	1432	c1ccc(c(c1)O)O
DZ	catechol	CTSG	1511	c1ccc(c(c1)O)O
DZ	catechol	CYP1A2	1544	c1ccc(c(c1)O)O
DZ	catechol	CYP1B1	1545	c1ccc(c(c1)O)O
DZ	catechol	CYP2A6	1548	c1ccc(c(c1)O)O
DZ	catechol	CYP2C19	1557	c1ccc(c(c1)O)O
DZ	catechol	CYP2C9	1559	c1ccc(c(c1)O)O
DZ	catechol	CYP2D6	1565	c1ccc(c(c1)O)O
DZ	catechol	CYP2E1	1571	c1ccc(c(c1)O)O
DZ	catechol	CYP3A4	1576	c1ccc(c(c1)O)O
DZ	catechol	ACE	1636	c1ccc(c(c1)O)O
DZ	catechol	AKR1C1	1645	c1ccc(c(c1)O)O
DZ	catechol	AKR1C2	1646	c1ccc(c(c1)O)O
DZ	catechol	NQO1	1728	c1ccc(c(c1)O)O
DZ	catechol	DRD1	1812	c1ccc(c(c1)O)O
DZ	catechol	DRD2	1813	c1ccc(c(c1)O)O
DZ	catechol	DRD3	1814	c1ccc(c(c1)O)O
DZ	catechol	DRD4	1815	c1ccc(c(c1)O)O
DZ	catechol	EDNRA	1909	c1ccc(c(c1)O)O
DZ	catechol	EGFR	1956	c1ccc(c(c1)O)O
DZ	catechol	ERBB2	2064	c1ccc(c(c1)O)O
DZ	catechol	ESR1	2099	c1ccc(c(c1)O)O
DZ	catechol	ESR2	2100	c1ccc(c(c1)O)O
DZ	catechol	GCG	2641	c1ccc(c(c1)O)O
DZ	catechol	HMBS	3145	c1ccc(c(c1)O)O
DZ	catechol	HMGCR	3156	c1ccc(c(c1)O)O
DZ	catechol	HMOX1	3162	c1ccc(c(c1)O)O
DZ	catechol	HRH1	3269	c1ccc(c(c1)O)O
DZ	catechol	HRH2	3274	c1ccc(c(c1)O)O
DZ	catechol	HTR1A	3350	c1ccc(c(c1)O)O
DZ	catechol	HTR1B	3351	c1ccc(c(c1)O)O
DZ	catechol	HTR2A	3356	c1ccc(c(c1)O)O
DZ	catechol	HTR2B	3357	c1ccc(c(c1)O)O
DZ	catechol	HTR2C	3358	c1ccc(c(c1)O)O
DZ	catechol	HTR4	3360	c1ccc(c(c1)O)O
DZ	catechol	HTR6	3362	c1ccc(c(c1)O)O
DZ	catechol	IL8	3576	c1ccc(c(c1)O)O
DZ	catechol	INSR	3643	c1ccc(c(c1)O)O
DZ	catechol	LCK	3932	c1ccc(c(c1)O)O
DZ	catechol	LCN2	3934	c1ccc(c(c1)O)O
DZ	catechol	LPO	4025	c1ccc(c(c1)O)O
DZ	catechol	LTC4S	4056	c1ccc(c(c1)O)O
DZ	catechol	MAOA	4128	c1ccc(c(c1)O)O
DZ	catechol	MAPT	4137	c1ccc(c(c1)O)O
DZ	catechol	MC3R	4159	c1ccc(c(c1)O)O
DZ	catechol	MC4R	4160	c1ccc(c(c1)O)O
DZ	catechol	MC5R	4161	c1ccc(c(c1)O)O
DZ	catechol	AFF1	4299	c1ccc(c(c1)O)O
DZ	catechol	MMP1	4312	c1ccc(c(c1)O)O
DZ	catechol	MMP2	4313	c1ccc(c(c1)O)O
DZ	catechol	MMP3	4314	c1ccc(c(c1)O)O
DZ	catechol	MMP8	4317	c1ccc(c(c1)O)O
DZ	catechol	MMP9	4318	c1ccc(c(c1)O)O
DZ	catechol	MPO	4353	c1ccc(c(c1)O)O
DZ	catechol	MYB	4602	c1ccc(c(c1)O)O
DZ	catechol	NGF	4803	c1ccc(c(c1)O)O
DZ	catechol	NOS1	4842	c1ccc(c(c1)O)O
DZ	catechol	NOS2	4843	c1ccc(c(c1)O)O
DZ	catechol	NPY1R	4886	c1ccc(c(c1)O)O
DZ	catechol	NPY2R	4887	c1ccc(c(c1)O)O
DZ	catechol	OPRD1	4985	c1ccc(c(c1)O)O
DZ	catechol	OPRK1	4986	c1ccc(c(c1)O)O
DZ	catechol	OPRM1	4988	c1ccc(c(c1)O)O
DZ	catechol	PGR	5241	c1ccc(c(c1)O)O
DZ	catechol	PRKCA	5578	c1ccc(c(c1)O)O
DZ	catechol	MAPK1	5594	c1ccc(c(c1)O)O
DZ	catechol	MAPK3	5595	c1ccc(c(c1)O)O
DZ	catechol	PTAFR	5724	c1ccc(c(c1)O)O
DZ	catechol	PTGS1	5742	c1ccc(c(c1)O)O
DZ	catechol	PTGS2	5743	c1ccc(c(c1)O)O
DZ	catechol	SULT1A2	6799	c1ccc(c(c1)O)O
DZ	catechol	SULT1A1	6817	c1ccc(c(c1)O)O
DZ	catechol	TACR2	6865	c1ccc(c(c1)O)O
DZ	catechol	TACR1	6869	c1ccc(c(c1)O)O
DZ	catechol	TBXAS1	6916	c1ccc(c(c1)O)O
DZ	catechol	TYR	7299	c1ccc(c(c1)O)O
DZ	catechol	TYR	7299	c1ccc(c(c1)O)O
DZ	catechol	VEGFA	7422	c1ccc(c(c1)O)O
DZ	catechol	VIPR1	7433	c1ccc(c(c1)O)O
DZ	catechol	XDH	7498	c1ccc(c(c1)O)O
DZ	catechol	catM	8130	c1ccc(c(c1)O)O
DZ	catechol	EPX	8288	c1ccc(c(c1)O)O
DZ	catechol	AKR1C3	8644	c1ccc(c(c1)O)O
DZ	catechol	PDE5A	8654	c1ccc(c(c1)O)O
DZ	catechol	SIGMAR1	10280	c1ccc(c(c1)O)O
DZ	catechol	CYSLTR1	10800	c1ccc(c(c1)O)O
DZ	catechol	CA5B	11238	c1ccc(c(c1)O)O
DZ	catechol	CA5B	11238	c1ccc(c(c1)O)O
DZ	catechol	CA5B	11238	c1ccc(c(c1)O)O
DZ	catechol	ca14	23632	c1ccc(c(c1)O)O
DZ	catechol	DHDH	27294	c1ccc(c(c1)O)O
DZ	catechol	TDP1	55775	c1ccc(c(c1)O)O
DZ	catechol	ca13	377677	c1ccc(c(c1)O)O
DZ	catechol	CCR2	729230	c1ccc(c(c1)O)O
DZ	catechol	Ccan_08690	10979840	c1ccc(c(c1)O)O
DZ	colubrinic acid	Gli1	2735	CC(=C)C1CCC2(C1C3CCC4C(C3(CC2)C)(CCC5C4(C(C(C5(C)C)O)C=O)C)C)C(=O)O
DZ	colubrinic acid	Ptch1	5727	CC(=C)C1CCC2(C1C3CCC4C(C3(CC2)C)(CCC5C4(C(C(C5(C)C)O)C=O)C)C)C(=O)O
DZ	coumestrol	ALPI	248	c1cc2c(cc1O)oc3c2c(=O)oc4c3ccc(c4)O
DZ	coumestrol	ALPL	249	c1cc2c(cc1O)oc3c2c(=O)oc4c3ccc(c4)O
DZ	coumestrol	AR	367	c1cc2c(cc1O)oc3c2c(=O)oc4c3ccc(c4)O
DZ	coumestrol	cyp2b6	1555	c1cc2c(cc1O)oc3c2c(=O)oc4c3ccc(c4)O
DZ	coumestrol	cyp3a4	1576	c1cc2c(cc1O)oc3c2c(=O)oc4c3ccc(c4)O
DZ	coumestrol	CYP19A1	1588	c1cc2c(cc1O)oc3c2c(=O)oc4c3ccc(c4)O
DZ	coumestrol	ATN1	1822	c1cc2c(cc1O)oc3c2c(=O)oc4c3ccc(c4)O
DZ	coumestrol	ESR1	2099	c1cc2c(cc1O)oc3c2c(=O)oc4c3ccc(c4)O
DZ	coumestrol	ESR2	2100	c1cc2c(cc1O)oc3c2c(=O)oc4c3ccc(c4)O
DZ	coumestrol	FOS	2353	c1cc2c(cc1O)oc3c2c(=O)oc4c3ccc(c4)O
DZ	coumestrol	GUSB	2990	c1cc2c(cc1O)oc3c2c(=O)oc4c3ccc(c4)O
DZ	coumestrol	HRAS	3265	c1cc2c(cc1O)oc3c2c(=O)oc4c3ccc(c4)O
DZ	coumestrol	HSP90AA1	3320	c1cc2c(cc1O)oc3c2c(=O)oc4c3ccc(c4)O
DZ	coumestrol	KLRB1	3820	c1cc2c(cc1O)oc3c2c(=O)oc4c3ccc(c4)O
DZ	coumestrol	PGR	5241	c1cc2c(cc1O)oc3c2c(=O)oc4c3ccc(c4)O
DZ	coumestrol	VEGFA	7422	c1cc2c(cc1O)oc3c2c(=O)oc4c3ccc(c4)O
DZ	coumestrol	YES1	7525	c1cc2c(cc1O)oc3c2c(=O)oc4c3ccc(c4)O
DZ	coumestrol	TNFSF11	8600	c1cc2c(cc1O)oc3c2c(=O)oc4c3ccc(c4)O
DZ	coumestrol	NR1I2	8856	c1cc2c(cc1O)oc3c2c(=O)oc4c3ccc(c4)O
DZ	coumestrol	TP53I11	9537	c1cc2c(cc1O)oc3c2c(=O)oc4c3ccc(c4)O
DZ	coumestrol	NOD1	10392	c1cc2c(cc1O)oc3c2c(=O)oc4c3ccc(c4)O
DZ	coumestrol	CDC37	11140	c1cc2c(cc1O)oc3c2c(=O)oc4c3ccc(c4)O
DZ	coumestrol	ZBP1	81030	c1cc2c(cc1O)oc3c2c(=O)oc4c3ccc(c4)O
DZ	coumestrol	NLRC3	197358	c1cc2c(cc1O)oc3c2c(=O)oc4c3ccc(c4)O
DZ	Crataegolic acid/MASLINIC ACID	PTGS2	5743	C[C@@]12CC[C@@H]3[C@@]([C@H]1CC=C4[C@]2(CC[C@@]5([C@H]4CC(CC5)(C)C)C(=O)[O-])C)(C[C@H]([C@@H](C3(C)C)O)O)C
DZ	Crataegolic acid/MASLINIC ACID	PTPN1	5770	C[C@@]12CC[C@@H]3[C@@]([C@H]1CC=C4[C@]2(CC[C@@]5([C@H]4CC(CC5)(C)C)C(=O)[O-])C)(C[C@H]([C@@H](C3(C)C)O)O)C
DZ	Crataegolic acid/MASLINIC ACID	PTPN1	5770	C[C@@]12CC[C@@H]3[C@@]([C@H]1CC=C4[C@]2(CC[C@@]5([C@H]4CC(CC5)(C)C)C(=O)[O-])C)(C[C@H]([C@@H](C3(C)C)O)O)C
DZ	Crataegolic acid/MASLINIC ACID	PTPN1	5770	C[C@@]12CC[C@@H]3[C@@]([C@H]1CC=C4[C@]2(CC[C@@]5([C@H]4CC(CC5)(C)C)C(=O)[O-])C)(C[C@H]([C@@H](C3(C)C)O)O)C
DZ	Crataegolic acid/MASLINIC ACID	PTPN2	5771	C[C@@]12CC[C@@H]3[C@@]([C@H]1CC=C4[C@]2(CC[C@@]5([C@H]4CC(CC5)(C)C)C(=O)[O-])C)(C[C@H]([C@@H](C3(C)C)O)O)C
DZ	Crataegolic acid/MASLINIC ACID	PTPRF	5792	C[C@@]12CC[C@@H]3[C@@]([C@H]1CC=C4[C@]2(CC[C@@]5([C@H]4CC(CC5)(C)C)C(=O)[O-])C)(C[C@H]([C@@H](C3(C)C)O)O)C
DZ	Crataegolic acid/MASLINIC ACID	PYGL	5836	C[C@@]12CC[C@@H]3[C@@]([C@H]1CC=C4[C@]2(CC[C@@]5([C@H]4CC(CC5)(C)C)C(=O)[O-])C)(C[C@H]([C@@H](C3(C)C)O)O)C
DZ	Crataegolic acid/MASLINIC ACID	PYGM	5837	C[C@@]12CC[C@@H]3[C@@]([C@H]1CC=C4[C@]2(CC[C@@]5([C@H]4CC(CC5)(C)C)C(=O)[O-])C)(C[C@H]([C@@H](C3(C)C)O)O)C
DZ	Crataegolic acid/MASLINIC ACID	SLC1A2	6506	C[C@@]12CC[C@@H]3[C@@]([C@H]1CC=C4[C@]2(CC[C@@]5([C@H]4CC(CC5)(C)C)C(=O)[O-])C)(C[C@H]([C@@H](C3(C)C)O)O)C
DZ	Crataegolic acid/MASLINIC ACID	SLC1A2	6506	C[C@@]12CC[C@@H]3[C@@]([C@H]1CC=C4[C@]2(CC[C@@]5([C@H]4CC(CC5)(C)C)C(=O)[O-])C)(C[C@H]([C@@H](C3(C)C)O)O)C
DZ	Crataegolic acid/MASLINIC ACID	SLC1A3	6507	C[C@@]12CC[C@@H]3[C@@]([C@H]1CC=C4[C@]2(CC[C@@]5([C@H]4CC(CC5)(C)C)C(=O)[O-])C)(C[C@H]([C@@H](C3(C)C)O)O)C
DZ	Crataegolic acid/MASLINIC ACID	SLC1A3	6507	C[C@@]12CC[C@@H]3[C@@]([C@H]1CC=C4[C@]2(CC[C@@]5([C@H]4CC(CC5)(C)C)C(=O)[O-])C)(C[C@H]([C@@H](C3(C)C)O)O)C
DZ	Crataegolic acid/MASLINIC ACID	AKR1B10	57016	C[C@@]12CC[C@@H]3[C@@]([C@H]1CC=C4[C@]2(CC[C@@]5([C@H]4CC(CC5)(C)C)C(=O)[O-])C)(C[C@H]([C@@H](C3(C)C)O)O)C
DZ	Crataegolic acid/MASLINIC ACID	TMEM43	79188	C[C@@]12CC[C@@H]3[C@@]([C@H]1CC=C4[C@]2(CC[C@@]5([C@H]4CC(CC5)(C)C)C(=O)[O-])C)(C[C@H]([C@@H](C3(C)C)O)O)C
DZ	desmosterol	ABCA1	19	C[C@H](CCC=C(C)C)[C@H]1CC[C@@H]2[C@@]1(CC[C@H]3[C@H]2CC=C4[C@@]3(CC[C@@H](C4)O)C)C
DZ	desmosterol	CYP27A1	1593	C[C@H](CCC=C(C)C)[C@H]1CC[C@@H]2[C@@]1(CC[C@H]3[C@H]2CC=C4[C@@]3(CC[C@@H](C4)O)C)C
DZ	desmosterol	DHCR7	1717	C[C@H](CCC=C(C)C)[C@H]1CC[C@@H]2[C@@]1(CC[C@H]3[C@H]2CC=C4[C@@]3(CC[C@@H](C4)O)C)C
DZ	desmosterol	DHCR24	1718	C[C@H](CCC=C(C)C)[C@H]1CC[C@@H]2[C@@]1(CC[C@H]3[C@H]2CC=C4[C@@]3(CC[C@@H](C4)O)C)C
DZ	desmosterol	HMGCR	3156	C[C@H](CCC=C(C)C)[C@H]1CC[C@@H]2[C@@]1(CC[C@H]3[C@H]2CC=C4[C@@]3(CC[C@@H](C4)O)C)C
DZ	desmosterol	SC5D	6309	C[C@H](CCC=C(C)C)[C@H]1CC[C@@H]2[C@@]1(CC[C@H]3[C@H]2CC=C4[C@@]3(CC[C@@H](C4)O)C)C
DZ	desmosterol	GPR85	54329	C[C@H](CCC=C(C)C)[C@H]1CC[C@@H]2[C@@]1(CC[C@H]3[C@H]2CC=C4[C@@]3(CC[C@@H](C4)O)C)C
DZ	hexadecanoicacid/palmitic acid	ABCA1	19	CCCCCCCCCCCCCCCC(=O)[O-]
DZ	hexadecanoicacid/palmitic acid	ACACB	32	CCCCCCCCCCCCCCCC(=O)[O-]
DZ	hexadecanoicacid/palmitic acid	ACADL	33	CCCCCCCCCCCCCCCC(=O)[O-]
DZ	hexadecanoicacid/palmitic acid	ACADM	34	CCCCCCCCCCCCCCCC(=O)[O-]
DZ	hexadecanoicacid/palmitic acid	ACADM	34	CCCCCCCCCCCCCCCC(=O)[O-]
DZ	hexadecanoicacid/palmitic acid	ACADVL	37	CCCCCCCCCCCCCCCC(=O)[O-]
DZ	hexadecanoicacid/palmitic acid	ACLY	47	CCCCCCCCCCCCCCCC(=O)[O-]
DZ	hexadecanoicacid/palmitic acid	ACLY	47	CCCCCCCCCCCCCCCC(=O)[O-]
DZ	hexadecanoicacid/palmitic acid	ACOX1	51	CCCCCCCCCCCCCCCC(=O)[O-]
DZ	hexadecanoicacid/palmitic acid	PLIN2	123	CCCCCCCCCCCCCCCC(=O)[O-]
DZ	hexadecanoicacid/palmitic acid	ADRA1D	146	CCCCCCCCCCCCCCCC(=O)[O-]
DZ	hexadecanoicacid/palmitic acid	ADRA1D	146	CCCCCCCCCCCCCCCC(=O)[O-]
DZ	hexadecanoicacid/palmitic acid	ADRA1B	147	CCCCCCCCCCCCCCCC(=O)[O-]
DZ	hexadecanoicacid/palmitic acid	ADRA1B	147	CCCCCCCCCCCCCCCC(=O)[O-]
DZ	hexadecanoicacid/palmitic acid	ADRA1A	148	CCCCCCCCCCCCCCCC(=O)[O-]
DZ	hexadecanoicacid/palmitic acid	ADRBK1	156	CCCCCCCCCCCCCCCC(=O)[O-]
DZ	hexadecanoicacid/palmitic acid	AGT	183	CCCCCCCCCCCCCCCC(=O)[O-]
DZ	hexadecanoicacid/palmitic acid	AGTR1	185	CCCCCCCCCCCCCCCC(=O)[O-]
DZ	hexadecanoicacid/palmitic acid	AGTR1	185	CCCCCCCCCCCCCCCC(=O)[O-]
DZ	hexadecanoicacid/palmitic acid	AKT1	207	CCCCCCCCCCCCCCCC(=O)[O-]
DZ	hexadecanoicacid/palmitic acid	AKT1	207	CCCCCCCCCCCCCCCC(=O)[O-]
DZ	hexadecanoicacid/palmitic acid	ALAS1	211	CCCCCCCCCCCCCCCC(=O)[O-]
DZ	hexadecanoicacid/palmitic acid	ALB	213	CCCCCCCCCCCCCCCC(=O)[O-]
DZ	hexadecanoicacid/palmitic acid	ALB	213	CCCCCCCCCCCCCCCC(=O)[O-]
DZ	hexadecanoicacid/palmitic acid	ABCD1	215	CCCCCCCCCCCCCCCC(=O)[O-]
DZ	hexadecanoicacid/palmitic acid	ANXA1	301	CCCCCCCCCCCCCCCC(=O)[O-]
DZ	hexadecanoicacid/palmitic acid	ANXA1	301	CCCCCCCCCCCCCCCC(=O)[O-]
DZ	hexadecanoicacid/palmitic acid	XIAP	331	CCCCCCCCCCCCCCCC(=O)[O-]
DZ	hexadecanoicacid/palmitic acid	APOA1	335	CCCCCCCCCCCCCCCC(=O)[O-]
DZ	hexadecanoicacid/palmitic acid	APOA2	336	CCCCCCCCCCCCCCCC(=O)[O-]
DZ	hexadecanoicacid/palmitic acid	APOB	338	CCCCCCCCCCCCCCCC(=O)[O-]
DZ	hexadecanoicacid/palmitic acid	APOB	338	CCCCCCCCCCCCCCCC(=O)[O-]
DZ	hexadecanoicacid/palmitic acid	APP	351	CCCCCCCCCCCCCCCC(=O)[O-]
DZ	hexadecanoicacid/palmitic acid	APP	351	CCCCCCCCCCCCCCCC(=O)[O-]
DZ	hexadecanoicacid/palmitic acid	ARNTL	406	CCCCCCCCCCCCCCCC(=O)[O-]
DZ	hexadecanoicacid/palmitic acid	ATF3	467	CCCCCCCCCCCCCCCC(=O)[O-]
DZ	hexadecanoicacid/palmitic acid	ATF4	468	CCCCCCCCCCCCCCCC(=O)[O-]
DZ	hexadecanoicacid/palmitic acid	ATF4	468	CCCCCCCCCCCCCCCC(=O)[O-]
DZ	hexadecanoicacid/palmitic acid	ATIC	471	CCCCCCCCCCCCCCCC(=O)[O-]
DZ	hexadecanoicacid/palmitic acid	AVP	551	CCCCCCCCCCCCCCCC(=O)[O-]
DZ	hexadecanoicacid/palmitic acid	AVPR1A	552	CCCCCCCCCCCCCCCC(=O)[O-]
DZ	hexadecanoicacid/palmitic acid	AVPR1A	552	CCCCCCCCCCCCCCCC(=O)[O-]
DZ	hexadecanoicacid/palmitic acid	AVPR1B	553	CCCCCCCCCCCCCCCC(=O)[O-]
DZ	hexadecanoicacid/palmitic acid	AVPR1B	553	CCCCCCCCCCCCCCCC(=O)[O-]
DZ	hexadecanoicacid/palmitic acid	B2M	567	CCCCCCCCCCCCCCCC(=O)[O-]
DZ	hexadecanoicacid/palmitic acid	B2M	567	CCCCCCCCCCCCCCCC(=O)[O-]
DZ	hexadecanoicacid/palmitic acid	BAX	581	CCCCCCCCCCCCCCCC(=O)[O-]
DZ	hexadecanoicacid/palmitic acid	BAX	581	CCCCCCCCCCCCCCCC(=O)[O-]
DZ	hexadecanoicacid/palmitic acid	BCL2	596	CCCCCCCCCCCCCCCC(=O)[O-]
DZ	hexadecanoicacid/palmitic acid	BCL2	596	CCCCCCCCCCCCCCCC(=O)[O-]
DZ	hexadecanoicacid/palmitic acid	BCL2	596	CCCCCCCCCCCCCCCC(=O)[O-]
DZ	hexadecanoicacid/palmitic acid	BCL2	596	CCCCCCCCCCCCCCCC(=O)[O-]
DZ	hexadecanoicacid/palmitic acid	BDKRB1	623	CCCCCCCCCCCCCCCC(=O)[O-]
DZ	hexadecanoicacid/palmitic acid	BDKRB1	623	CCCCCCCCCCCCCCCC(=O)[O-]
DZ	hexadecanoicacid/palmitic acid	BDKRB2	624	CCCCCCCCCCCCCCCC(=O)[O-]
DZ	hexadecanoicacid/palmitic acid	BDKRB2	624	CCCCCCCCCCCCCCCC(=O)[O-]
DZ	hexadecanoicacid/palmitic acid	BMP4	652	CCCCCCCCCCCCCCCC(=O)[O-]
DZ	hexadecanoicacid/palmitic acid	C2	717	CCCCCCCCCCCCCCCC(=O)[O-]
DZ	hexadecanoicacid/palmitic acid	CASP3	836	CCCCCCCCCCCCCCCC(=O)[O-]
DZ	hexadecanoicacid/palmitic acid	CASP3	836	CCCCCCCCCCCCCCCC(=O)[O-]
DZ	hexadecanoicacid/palmitic acid	CASP6	839	CCCCCCCCCCCCCCCC(=O)[O-]
DZ	hexadecanoicacid/palmitic acid	CASP6	839	CCCCCCCCCCCCCCCC(=O)[O-]
DZ	hexadecanoicacid/palmitic acid	CASP9	842	CCCCCCCCCCCCCCCC(=O)[O-]
DZ	hexadecanoicacid/palmitic acid	CASR	846	CCCCCCCCCCCCCCCC(=O)[O-]
DZ	hexadecanoicacid/palmitic acid	CASR	846	CCCCCCCCCCCCCCCC(=O)[O-]
DZ	hexadecanoicacid/palmitic acid	CAT	847	CCCCCCCCCCCCCCCC(=O)[O-]
DZ	hexadecanoicacid/palmitic acid	CAT	847	CCCCCCCCCCCCCCCC(=O)[O-]
DZ	hexadecanoicacid/palmitic acid	CCK	885	CCCCCCCCCCCCCCCC(=O)[O-]
DZ	hexadecanoicacid/palmitic acid	CCK	885	CCCCCCCCCCCCCCCC(=O)[O-]
DZ	hexadecanoicacid/palmitic acid	CCKAR	886	CCCCCCCCCCCCCCCC(=O)[O-]
DZ	hexadecanoicacid/palmitic acid	CCKAR	886	CCCCCCCCCCCCCCCC(=O)[O-]
DZ	hexadecanoicacid/palmitic acid	CCKBR	887	CCCCCCCCCCCCCCCC(=O)[O-]
DZ	hexadecanoicacid/palmitic acid	CCKBR	887	CCCCCCCCCCCCCCCC(=O)[O-]
DZ	hexadecanoicacid/palmitic acid	CCNC	892	CCCCCCCCCCCCCCCC(=O)[O-]
DZ	hexadecanoicacid/palmitic acid	CD1A	909	CCCCCCCCCCCCCCCC(=O)[O-]
DZ	hexadecanoicacid/palmitic acid	CD1D	912	CCCCCCCCCCCCCCCC(=O)[O-]
DZ	hexadecanoicacid/palmitic acid	CD1E	913	CCCCCCCCCCCCCCCC(=O)[O-]
DZ	hexadecanoicacid/palmitic acid	CD36	948	CCCCCCCCCCCCCCCC(=O)[O-]
DZ	hexadecanoicacid/palmitic acid	CD36	948	CCCCCCCCCCCCCCCC(=O)[O-]
DZ	hexadecanoicacid/palmitic acid	CDK8	1024	CCCCCCCCCCCCCCCC(=O)[O-]
DZ	hexadecanoicacid/palmitic acid	CEL	1056	CCCCCCCCCCCCCCCC(=O)[O-]
DZ	hexadecanoicacid/palmitic acid	CES1	1066	CCCCCCCCCCCCCCCC(=O)[O-]
DZ	hexadecanoicacid/palmitic acid	CES1	1066	CCCCCCCCCCCCCCCC(=O)[O-]
DZ	hexadecanoicacid/palmitic acid	CHRM1	1128	CCCCCCCCCCCCCCCC(=O)[O-]
DZ	hexadecanoicacid/palmitic acid	CHRM1	1128	CCCCCCCCCCCCCCCC(=O)[O-]
DZ	hexadecanoicacid/palmitic acid	CHRM3	1131	CCCCCCCCCCCCCCCC(=O)[O-]
DZ	hexadecanoicacid/palmitic acid	CHRM3	1131	CCCCCCCCCCCCCCCC(=O)[O-]
DZ	hexadecanoicacid/palmitic acid	CHRM5	1133	CCCCCCCCCCCCCCCC(=O)[O-]
DZ	hexadecanoicacid/palmitic acid	CHRM5	1133	CCCCCCCCCCCCCCCC(=O)[O-]
DZ	hexadecanoicacid/palmitic acid	CLPS	1208	CCCCCCCCCCCCCCCC(=O)[O-]
DZ	hexadecanoicacid/palmitic acid	LTB4R	1241	CCCCCCCCCCCCCCCC(=O)[O-]
DZ	hexadecanoicacid/palmitic acid	LTB4R	1241	CCCCCCCCCCCCCCCC(=O)[O-]
DZ	hexadecanoicacid/palmitic acid	COL1A1	1277	CCCCCCCCCCCCCCCC(=O)[O-]
DZ	hexadecanoicacid/palmitic acid	COL1A1	1277	CCCCCCCCCCCCCCCC(=O)[O-]
DZ	hexadecanoicacid/palmitic acid	CPT1A	1374	CCCCCCCCCCCCCCCC(=O)[O-]
DZ	hexadecanoicacid/palmitic acid	CPT1A	1374	CCCCCCCCCCCCCCCC(=O)[O-]
DZ	hexadecanoicacid/palmitic acid	CPT1B	1375	CCCCCCCCCCCCCCCC(=O)[O-]
DZ	hexadecanoicacid/palmitic acid	CPT1B	1375	CCCCCCCCCCCCCCCC(=O)[O-]
DZ	hexadecanoicacid/palmitic acid	CPT2	1376	CCCCCCCCCCCCCCCC(=O)[O-]
DZ	hexadecanoicacid/palmitic acid	CPT2	1376	CCCCCCCCCCCCCCCC(=O)[O-]
DZ	hexadecanoicacid/palmitic acid	CRAT	1384	CCCCCCCCCCCCCCCC(=O)[O-]
DZ	hexadecanoicacid/palmitic acid	CREB1	1385	CCCCCCCCCCCCCCCC(=O)[O-]
DZ	hexadecanoicacid/palmitic acid	CREBBP	1387	CCCCCCCCCCCCCCCC(=O)[O-]
DZ	hexadecanoicacid/palmitic acid	CREBBP	1387	CCCCCCCCCCCCCCCC(=O)[O-]
DZ	hexadecanoicacid/palmitic acid	CRP	1401	CCCCCCCCCCCCCCCC(=O)[O-]
DZ	hexadecanoicacid/palmitic acid	CS	1431	CCCCCCCCCCCCCCCC(=O)[O-]
DZ	hexadecanoicacid/palmitic acid	MAPK14	1432	CCCCCCCCCCCCCCCC(=O)[O-]
DZ	hexadecanoicacid/palmitic acid	CTGF	1490	CCCCCCCCCCCCCCCC(=O)[O-]
DZ	hexadecanoicacid/palmitic acid	CTNNB1	1499	CCCCCCCCCCCCCCCC(=O)[O-]
DZ	hexadecanoicacid/palmitic acid	CYB5A	1528	CCCCCCCCCCCCCCCC(=O)[O-]
DZ	hexadecanoicacid/palmitic acid	CYP1A1	1543	CCCCCCCCCCCCCCCC(=O)[O-]
DZ	hexadecanoicacid/palmitic acid	CYP2C8	1558	CCCCCCCCCCCCCCCC(=O)[O-]
DZ	hexadecanoicacid/palmitic acid	CYP2C8	1558	CCCCCCCCCCCCCCCC(=O)[O-]
DZ	hexadecanoicacid/palmitic acid	CYP2E1	1571	CCCCCCCCCCCCCCCC(=O)[O-]
DZ	hexadecanoicacid/palmitic acid	CYP4A11	1579	CCCCCCCCCCCCCCCC(=O)[O-]
DZ	hexadecanoicacid/palmitic acid	CYP7A1	1581	CCCCCCCCCCCCCCCC(=O)[O-]
DZ	hexadecanoicacid/palmitic acid	CYP19A1	1588	CCCCCCCCCCCCCCCC(=O)[O-]
DZ	hexadecanoicacid/palmitic acid	DBI	1622	CCCCCCCCCCCCCCCC(=O)[O-]
DZ	hexadecanoicacid/palmitic acid	DDIT3	1649	CCCCCCCCCCCCCCCC(=O)[O-]
DZ	hexadecanoicacid/palmitic acid	DECR1	1666	CCCCCCCCCCCCCCCC(=O)[O-]
DZ	hexadecanoicacid/palmitic acid	DNASE2	1777	CCCCCCCCCCCCCCCC(=O)[O-]
DZ	hexadecanoicacid/palmitic acid	LPAR1	1902	CCCCCCCCCCCCCCCC(=O)[O-]
DZ	hexadecanoicacid/palmitic acid	LPAR1	1902	CCCCCCCCCCCCCCCC(=O)[O-]
DZ	hexadecanoicacid/palmitic acid	EDN1	1906	CCCCCCCCCCCCCCCC(=O)[O-]
DZ	hexadecanoicacid/palmitic acid	EDN1	1906	CCCCCCCCCCCCCCCC(=O)[O-]
DZ	hexadecanoicacid/palmitic acid	EDN2	1907	CCCCCCCCCCCCCCCC(=O)[O-]
DZ	hexadecanoicacid/palmitic acid	EDN2	1907	CCCCCCCCCCCCCCCC(=O)[O-]
DZ	hexadecanoicacid/palmitic acid	EDN3	1908	CCCCCCCCCCCCCCCC(=O)[O-]
DZ	hexadecanoicacid/palmitic acid	EDN3	1908	CCCCCCCCCCCCCCCC(=O)[O-]
DZ	hexadecanoicacid/palmitic acid	EDNRA	1909	CCCCCCCCCCCCCCCC(=O)[O-]
DZ	hexadecanoicacid/palmitic acid	EDNRA	1909	CCCCCCCCCCCCCCCC(=O)[O-]
DZ	hexadecanoicacid/palmitic acid	EDNRB	1910	CCCCCCCCCCCCCCCC(=O)[O-]
DZ	hexadecanoicacid/palmitic acid	EDNRB	1910	CCCCCCCCCCCCCCCC(=O)[O-]
DZ	hexadecanoicacid/palmitic acid	EGR1	1958	CCCCCCCCCCCCCCCC(=O)[O-]
DZ	hexadecanoicacid/palmitic acid	EGR1	1958	CCCCCCCCCCCCCCCC(=O)[O-]
DZ	hexadecanoicacid/palmitic acid	EIF2S1	1965	CCCCCCCCCCCCCCCC(=O)[O-]
DZ	hexadecanoicacid/palmitic acid	ENDOG	2021	CCCCCCCCCCCCCCCC(=O)[O-]
DZ	hexadecanoicacid/palmitic acid	EP300	2033	CCCCCCCCCCCCCCCC(=O)[O-]
DZ	hexadecanoicacid/palmitic acid	ERN1	2081	CCCCCCCCCCCCCCCC(=O)[O-]
DZ	hexadecanoicacid/palmitic acid	F2R	2149	CCCCCCCCCCCCCCCC(=O)[O-]
DZ	hexadecanoicacid/palmitic acid	F2R	2149	CCCCCCCCCCCCCCCC(=O)[O-]
DZ	hexadecanoicacid/palmitic acid	F2RL1	2150	CCCCCCCCCCCCCCCC(=O)[O-]
DZ	hexadecanoicacid/palmitic acid	F2RL1	2150	CCCCCCCCCCCCCCCC(=O)[O-]
DZ	hexadecanoicacid/palmitic acid	F2RL2	2151	CCCCCCCCCCCCCCCC(=O)[O-]
DZ	hexadecanoicacid/palmitic acid	F2RL2	2151	CCCCCCCCCCCCCCCC(=O)[O-]
DZ	hexadecanoicacid/palmitic acid	FABP4	2167	CCCCCCCCCCCCCCCC(=O)[O-]
DZ	hexadecanoicacid/palmitic acid	FABP4	2167	CCCCCCCCCCCCCCCC(=O)[O-]
DZ	hexadecanoicacid/palmitic acid	FABP1	2168	CCCCCCCCCCCCCCCC(=O)[O-]
DZ	hexadecanoicacid/palmitic acid	FABP1	2168	CCCCCCCCCCCCCCCC(=O)[O-]
DZ	hexadecanoicacid/palmitic acid	FABP2	2169	CCCCCCCCCCCCCCCC(=O)[O-]
DZ	hexadecanoicacid/palmitic acid	FABP2	2169	CCCCCCCCCCCCCCCC(=O)[O-]
DZ	hexadecanoicacid/palmitic acid	FABP3	2170	CCCCCCCCCCCCCCCC(=O)[O-]
DZ	hexadecanoicacid/palmitic acid	FABP3	2170	CCCCCCCCCCCCCCCC(=O)[O-]
DZ	hexadecanoicacid/palmitic acid	FABP5	2171	CCCCCCCCCCCCCCCC(=O)[O-]
DZ	hexadecanoicacid/palmitic acid	FABP5	2171	CCCCCCCCCCCCCCCC(=O)[O-]
DZ	hexadecanoicacid/palmitic acid	FABP6	2172	CCCCCCCCCCCCCCCC(=O)[O-]
DZ	hexadecanoicacid/palmitic acid	ACSL1	2180	CCCCCCCCCCCCCCCC(=O)[O-]
DZ	hexadecanoicacid/palmitic acid	ACSL1	2180	CCCCCCCCCCCCCCCC(=O)[O-]
DZ	hexadecanoicacid/palmitic acid	ACSL3	2181	CCCCCCCCCCCCCCCC(=O)[O-]
DZ	hexadecanoicacid/palmitic acid	ACSL3	2181	CCCCCCCCCCCCCCCC(=O)[O-]
DZ	hexadecanoicacid/palmitic acid	ACSL4	2182	CCCCCCCCCCCCCCCC(=O)[O-]
DZ	hexadecanoicacid/palmitic acid	ACSL4	2182	CCCCCCCCCCCCCCCC(=O)[O-]
DZ	hexadecanoicacid/palmitic acid	FANCB	2187	CCCCCCCCCCCCCCCC(=O)[O-]
DZ	hexadecanoicacid/palmitic acid	FASN	2194	CCCCCCCCCCCCCCCC(=O)[O-]
DZ	hexadecanoicacid/palmitic acid	FASN	2194	CCCCCCCCCCCCCCCC(=O)[O-]
DZ	hexadecanoicacid/palmitic acid	FASN	2194	CCCCCCCCCCCCCCCC(=O)[O-]
DZ	hexadecanoicacid/palmitic acid	FDFT1	2222	CCCCCCCCCCCCCCCC(=O)[O-]
DZ	hexadecanoicacid/palmitic acid	FHL2	2274	CCCCCCCCCCCCCCCC(=O)[O-]
DZ	hexadecanoicacid/palmitic acid	FOXM1	2305	CCCCCCCCCCCCCCCC(=O)[O-]
DZ	hexadecanoicacid/palmitic acid	FOXO1	2308	CCCCCCCCCCCCCCCC(=O)[O-]
DZ	hexadecanoicacid/palmitic acid	FOS	2353	CCCCCCCCCCCCCCCC(=O)[O-]
DZ	hexadecanoicacid/palmitic acid	FPR2	2358	CCCCCCCCCCCCCCCC(=O)[O-]
DZ	hexadecanoicacid/palmitic acid	FPR2	2358	CCCCCCCCCCCCCCCC(=O)[O-]
DZ	hexadecanoicacid/palmitic acid	MTOR	2475	CCCCCCCCCCCCCCCC(=O)[O-]
DZ	hexadecanoicacid/palmitic acid	GAST	2520	CCCCCCCCCCCCCCCC(=O)[O-]
DZ	hexadecanoicacid/palmitic acid	GAST	2520	CCCCCCCCCCCCCCCC(=O)[O-]
DZ	hexadecanoicacid/palmitic acid	FYN	2534	CCCCCCCCCCCCCCCC(=O)[O-]
DZ	hexadecanoicacid/palmitic acid	GCG	2641	CCCCCCCCCCCCCCCC(=O)[O-]
DZ	hexadecanoicacid/palmitic acid	GCG	2641	CCCCCCCCCCCCCCCC(=O)[O-]
DZ	hexadecanoicacid/palmitic acid	GCGR	2642	CCCCCCCCCCCCCCCC(=O)[O-]
DZ	hexadecanoicacid/palmitic acid	GCGR	2642	CCCCCCCCCCCCCCCC(=O)[O-]
DZ	hexadecanoicacid/palmitic acid	GHSR	2693	CCCCCCCCCCCCCCCC(=O)[O-]
DZ	hexadecanoicacid/palmitic acid	GIP	2695	CCCCCCCCCCCCCCCC(=O)[O-]
DZ	hexadecanoicacid/palmitic acid	GLP1R	2740	CCCCCCCCCCCCCCCC(=O)[O-]
DZ	hexadecanoicacid/palmitic acid	GNA11	2767	CCCCCCCCCCCCCCCC(=O)[O-]
DZ	hexadecanoicacid/palmitic acid	GNA15	2769	CCCCCCCCCCCCCCCC(=O)[O-]
DZ	hexadecanoicacid/palmitic acid	GNA15	2769	CCCCCCCCCCCCCCCC(=O)[O-]
DZ	hexadecanoicacid/palmitic acid	GNAQ	2776	CCCCCCCCCCCCCCCC(=O)[O-]
DZ	hexadecanoicacid/palmitic acid	GNB1	2782	CCCCCCCCCCCCCCCC(=O)[O-]
DZ	hexadecanoicacid/palmitic acid	GNRH1	2796	CCCCCCCCCCCCCCCC(=O)[O-]
DZ	hexadecanoicacid/palmitic acid	GNRH1	2796	CCCCCCCCCCCCCCCC(=O)[O-]
DZ	hexadecanoicacid/palmitic acid	GNRH2	2797	CCCCCCCCCCCCCCCC(=O)[O-]
DZ	hexadecanoicacid/palmitic acid	GNRH2	2797	CCCCCCCCCCCCCCCC(=O)[O-]
DZ	hexadecanoicacid/palmitic acid	GNRHR	2798	CCCCCCCCCCCCCCCC(=O)[O-]
DZ	hexadecanoicacid/palmitic acid	GNRHR	2798	CCCCCCCCCCCCCCCC(=O)[O-]
DZ	hexadecanoicacid/palmitic acid	GOT2	2806	CCCCCCCCCCCCCCCC(=O)[O-]
DZ	hexadecanoicacid/palmitic acid	GPR4	2828	CCCCCCCCCCCCCCCC(=O)[O-]
DZ	hexadecanoicacid/palmitic acid	GPR4	2828	CCCCCCCCCCCCCCCC(=O)[O-]
DZ	hexadecanoicacid/palmitic acid	XCR1	2829	CCCCCCCCCCCCCCCC(=O)[O-]
DZ	hexadecanoicacid/palmitic acid	XCR1	2829	CCCCCCCCCCCCCCCC(=O)[O-]
DZ	hexadecanoicacid/palmitic acid	UTS2R	2837	CCCCCCCCCCCCCCCC(=O)[O-]
DZ	hexadecanoicacid/palmitic acid	UTS2R	2837	CCCCCCCCCCCCCCCC(=O)[O-]
DZ	hexadecanoicacid/palmitic acid	GPR17	2840	CCCCCCCCCCCCCCCC(=O)[O-]
DZ	hexadecanoicacid/palmitic acid	GPR17	2840	CCCCCCCCCCCCCCCC(=O)[O-]
DZ	hexadecanoicacid/palmitic acid	LPAR4	2846	CCCCCCCCCCCCCCCC(=O)[O-]
DZ	hexadecanoicacid/palmitic acid	LPAR4	2846	CCCCCCCCCCCCCCCC(=O)[O-]
DZ	hexadecanoicacid/palmitic acid	MCHR1	2847	CCCCCCCCCCCCCCCC(=O)[O-]
DZ	hexadecanoicacid/palmitic acid	MLNR	2862	CCCCCCCCCCCCCCCC(=O)[O-]
DZ	hexadecanoicacid/palmitic acid	MLNR	2862	CCCCCCCCCCCCCCCC(=O)[O-]
DZ	hexadecanoicacid/palmitic acid	FFAR1	2864	CCCCCCCCCCCCCCCC(=O)[O-]
DZ	hexadecanoicacid/palmitic acid	FFAR1	2864	CCCCCCCCCCCCCCCC(=O)[O-]
DZ	hexadecanoicacid/palmitic acid	FFAR2	2867	CCCCCCCCCCCCCCCC(=O)[O-]
DZ	hexadecanoicacid/palmitic acid	FFAR2	2867	CCCCCCCCCCCCCCCC(=O)[O-]
DZ	hexadecanoicacid/palmitic acid	GRK5	2869	CCCCCCCCCCCCCCCC(=O)[O-]
DZ	hexadecanoicacid/palmitic acid	GRP	2922	CCCCCCCCCCCCCCCC(=O)[O-]
DZ	hexadecanoicacid/palmitic acid	GRP	2922	CCCCCCCCCCCCCCCC(=O)[O-]
DZ	hexadecanoicacid/palmitic acid	PDIA3	2923	CCCCCCCCCCCCCCCC(=O)[O-]
DZ	hexadecanoicacid/palmitic acid	GRPR	2925	CCCCCCCCCCCCCCCC(=O)[O-]
DZ	hexadecanoicacid/palmitic acid	GRPR	2925	CCCCCCCCCCCCCCCC(=O)[O-]
DZ	hexadecanoicacid/palmitic acid	GYS1	2997	CCCCCCCCCCCCCCCC(=O)[O-]
DZ	hexadecanoicacid/palmitic acid	GYS2	2998	CCCCCCCCCCCCCCCC(=O)[O-]
DZ	hexadecanoicacid/palmitic acid	HADHA	3030	CCCCCCCCCCCCCCCC(=O)[O-]
DZ	hexadecanoicacid/palmitic acid	HCRT	3060	CCCCCCCCCCCCCCCC(=O)[O-]
DZ	hexadecanoicacid/palmitic acid	HCRT	3060	CCCCCCCCCCCCCCCC(=O)[O-]
DZ	hexadecanoicacid/palmitic acid	HCRTR1	3061	CCCCCCCCCCCCCCCC(=O)[O-]
DZ	hexadecanoicacid/palmitic acid	HCRTR1	3061	CCCCCCCCCCCCCCCC(=O)[O-]
DZ	hexadecanoicacid/palmitic acid	HCRTR2	3062	CCCCCCCCCCCCCCCC(=O)[O-]
DZ	hexadecanoicacid/palmitic acid	HIF1A	3091	CCCCCCCCCCCCCCCC(=O)[O-]
DZ	hexadecanoicacid/palmitic acid	LDLCQ3	3156	CCCCCCCCCCCCCCCC(=O)[O-]
DZ	hexadecanoicacid/palmitic acid	HMGCS1	3157	CCCCCCCCCCCCCCCC(=O)[O-]
DZ	hexadecanoicacid/palmitic acid	HMGCS2	3158	CCCCCCCCCCCCCCCC(=O)[O-]
DZ	hexadecanoicacid/palmitic acid	NR4A1	3164	CCCCCCCCCCCCCCCC(=O)[O-]
DZ	hexadecanoicacid/palmitic acid	HNF4G	3174	CCCCCCCCCCCCCCCC(=O)[O-]
DZ	hexadecanoicacid/palmitic acid	HNF4G	3174	CCCCCCCCCCCCCCCC(=O)[O-]
DZ	hexadecanoicacid/palmitic acid	HRH1	3269	CCCCCCCCCCCCCCCC(=O)[O-]
DZ	hexadecanoicacid/palmitic acid	HTR2A	3356	CCCCCCCCCCCCCCCC(=O)[O-]
DZ	hexadecanoicacid/palmitic acid	HTR2A	3356	CCCCCCCCCCCCCCCC(=O)[O-]
DZ	hexadecanoicacid/palmitic acid	HTR2B	3357	CCCCCCCCCCCCCCCC(=O)[O-]
DZ	hexadecanoicacid/palmitic acid	HTR2B	3357	CCCCCCCCCCCCCCCC(=O)[O-]
DZ	hexadecanoicacid/palmitic acid	HTR2C	3358	CCCCCCCCCCCCCCCC(=O)[O-]
DZ	hexadecanoicacid/palmitic acid	HTR2C	3358	CCCCCCCCCCCCCCCC(=O)[O-]
DZ	hexadecanoicacid/palmitic acid	IAPP	3375	CCCCCCCCCCCCCCCC(=O)[O-]
DZ	hexadecanoicacid/palmitic acid	IDH1	3417	CCCCCCCCCCCCCCCC(=O)[O-]
DZ	hexadecanoicacid/palmitic acid	IL1RN	3557	CCCCCCCCCCCCCCCC(=O)[O-]
DZ	hexadecanoicacid/palmitic acid	IL6	3569	CCCCCCCCCCCCCCCC(=O)[O-]
DZ	hexadecanoicacid/palmitic acid	IL6	3569	CCCCCCCCCCCCCCCC(=O)[O-]
DZ	hexadecanoicacid/palmitic acid	IL8	3576	CCCCCCCCCCCCCCCC(=O)[O-]
DZ	hexadecanoicacid/palmitic acid	IL10	3586	CCCCCCCCCCCCCCCC(=O)[O-]
DZ	hexadecanoicacid/palmitic acid	IL10	3586	CCCCCCCCCCCCCCCC(=O)[O-]
DZ	hexadecanoicacid/palmitic acid	INS	3630	CCCCCCCCCCCCCCCC(=O)[O-]
DZ	hexadecanoicacid/palmitic acid	INS	3630	CCCCCCCCCCCCCCCC(=O)[O-]
DZ	hexadecanoicacid/palmitic acid	INSR	3643	CCCCCCCCCCCCCCCC(=O)[O-]
DZ	hexadecanoicacid/palmitic acid	INSR	3643	CCCCCCCCCCCCCCCC(=O)[O-]
DZ	hexadecanoicacid/palmitic acid	PDX1	3651	CCCCCCCCCCCCCCCC(=O)[O-]
DZ	hexadecanoicacid/palmitic acid	PDX1	3651	CCCCCCCCCCCCCCCC(=O)[O-]
DZ	hexadecanoicacid/palmitic acid	IRS1	3667	CCCCCCCCCCCCCCCC(=O)[O-]
DZ	hexadecanoicacid/palmitic acid	IRS1	3667	CCCCCCCCCCCCCCCC(=O)[O-]
DZ	hexadecanoicacid/palmitic acid	KISS1	3814	CCCCCCCCCCCCCCCC(=O)[O-]
DZ	hexadecanoicacid/palmitic acid	KISS1	3814	CCCCCCCCCCCCCCCC(=O)[O-]
DZ	hexadecanoicacid/palmitic acid	KNG1	3827	CCCCCCCCCCCCCCCC(=O)[O-]
DZ	hexadecanoicacid/palmitic acid	KNG1	3827	CCCCCCCCCCCCCCCC(=O)[O-]
DZ	hexadecanoicacid/palmitic acid	LALBA	3906	CCCCCCCCCCCCCCCC(=O)[O-]
DZ	hexadecanoicacid/palmitic acid	LALBA	3906	CCCCCCCCCCCCCCCC(=O)[O-]
DZ	hexadecanoicacid/palmitic acid	LCAT	3931	CCCCCCCCCCCCCCCC(=O)[O-]
DZ	hexadecanoicacid/palmitic acid	LEP	3952	CCCCCCCCCCCCCCCC(=O)[O-]
DZ	hexadecanoicacid/palmitic acid	LIPE	3991	CCCCCCCCCCCCCCCC(=O)[O-]
DZ	hexadecanoicacid/palmitic acid	FADS1	3992	CCCCCCCCCCCCCCCC(=O)[O-]
DZ	hexadecanoicacid/palmitic acid	FADS1	3992	CCCCCCCCCCCCCCCC(=O)[O-]
DZ	hexadecanoicacid/palmitic acid	LPL	4023	CCCCCCCCCCCCCCCC(=O)[O-]
DZ	hexadecanoicacid/palmitic acid	LPL	4023	CCCCCCCCCCCCCCCC(=O)[O-]
DZ	hexadecanoicacid/palmitic acid	LTC4S	4056	CCCCCCCCCCCCCCCC(=O)[O-]
DZ	hexadecanoicacid/palmitic acid	LTC4S	4056	CCCCCCCCCCCCCCCC(=O)[O-]
DZ	hexadecanoicacid/palmitic acid	ME1	4199	CCCCCCCCCCCCCCCC(=O)[O-]
DZ	hexadecanoicacid/palmitic acid	MLN	4295	CCCCCCCCCCCCCCCC(=O)[O-]
DZ	hexadecanoicacid/palmitic acid	MLN	4295	CCCCCCCCCCCCCCCC(=O)[O-]
DZ	hexadecanoicacid/palmitic acid	NDUFAB1	4706	CCCCCCCCCCCCCCCC(=O)[O-]
DZ	hexadecanoicacid/palmitic acid	NFKB1	4790	CCCCCCCCCCCCCCCC(=O)[O-]
DZ	hexadecanoicacid/palmitic acid	NFKB1	4790	CCCCCCCCCCCCCCCC(=O)[O-]
DZ	hexadecanoicacid/palmitic acid	NFYA	4800	CCCCCCCCCCCCCCCC(=O)[O-]
DZ	hexadecanoicacid/palmitic acid	NFYB	4801	CCCCCCCCCCCCCCCC(=O)[O-]
DZ	hexadecanoicacid/palmitic acid	NFYC	4802	CCCCCCCCCCCCCCCC(=O)[O-]
DZ	hexadecanoicacid/palmitic acid	NMB	4828	CCCCCCCCCCCCCCCC(=O)[O-]
DZ	hexadecanoicacid/palmitic acid	NMBR	4829	CCCCCCCCCCCCCCCC(=O)[O-]
DZ	hexadecanoicacid/palmitic acid	NMBR	4829	CCCCCCCCCCCCCCCC(=O)[O-]
DZ	hexadecanoicacid/palmitic acid	NMT1	4836	CCCCCCCCCCCCCCCC(=O)[O-]
DZ	hexadecanoicacid/palmitic acid	NOS1	4842	CCCCCCCCCCCCCCCC(=O)[O-]
DZ	hexadecanoicacid/palmitic acid	NOS2	4843	CCCCCCCCCCCCCCCC(=O)[O-]
DZ	hexadecanoicacid/palmitic acid	NOS2	4843	CCCCCCCCCCCCCCCC(=O)[O-]
DZ	hexadecanoicacid/palmitic acid	NOS3	4846	CCCCCCCCCCCCCCCC(=O)[O-]
DZ	hexadecanoicacid/palmitic acid	NPAS2	4862	CCCCCCCCCCCCCCCC(=O)[O-]
DZ	hexadecanoicacid/palmitic acid	NTS	4922	CCCCCCCCCCCCCCCC(=O)[O-]
DZ	hexadecanoicacid/palmitic acid	NTS	4922	CCCCCCCCCCCCCCCC(=O)[O-]
DZ	hexadecanoicacid/palmitic acid	NTSR1	4923	CCCCCCCCCCCCCCCC(=O)[O-]
DZ	hexadecanoicacid/palmitic acid	NTSR1	4923	CCCCCCCCCCCCCCCC(=O)[O-]
DZ	hexadecanoicacid/palmitic acid	OXT	5020	CCCCCCCCCCCCCCCC(=O)[O-]
DZ	hexadecanoicacid/palmitic acid	OXT	5020	CCCCCCCCCCCCCCCC(=O)[O-]
DZ	hexadecanoicacid/palmitic acid	OXTR	5021	CCCCCCCCCCCCCCCC(=O)[O-]
DZ	hexadecanoicacid/palmitic acid	OXTR	5021	CCCCCCCCCCCCCCCC(=O)[O-]
DZ	hexadecanoicacid/palmitic acid	P2RY1	5028	CCCCCCCCCCCCCCCC(=O)[O-]
DZ	hexadecanoicacid/palmitic acid	P2RY1	5028	CCCCCCCCCCCCCCCC(=O)[O-]
DZ	hexadecanoicacid/palmitic acid	P2RY2	5029	CCCCCCCCCCCCCCCC(=O)[O-]
DZ	hexadecanoicacid/palmitic acid	P2RY2	5029	CCCCCCCCCCCCCCCC(=O)[O-]
DZ	hexadecanoicacid/palmitic acid	P2RY6	5031	CCCCCCCCCCCCCCCC(=O)[O-]
DZ	hexadecanoicacid/palmitic acid	P2RY6	5031	CCCCCCCCCCCCCCCC(=O)[O-]
DZ	hexadecanoicacid/palmitic acid	PAEP	5047	CCCCCCCCCCCCCCCC(=O)[O-]
DZ	hexadecanoicacid/palmitic acid	PAEP	5047	CCCCCCCCCCCCCCCC(=O)[O-]
DZ	hexadecanoicacid/palmitic acid	PALM	5064	CCCCCCCCCCCCCCCC(=O)[O-]
DZ	hexadecanoicacid/palmitic acid	PCSK1	5122	CCCCCCCCCCCCCCCC(=O)[O-]
DZ	hexadecanoicacid/palmitic acid	PCYT1A	5130	CCCCCCCCCCCCCCCC(=O)[O-]
DZ	hexadecanoicacid/palmitic acid	PCYT1A	5130	CCCCCCCCCCCCCCCC(=O)[O-]
DZ	hexadecanoicacid/palmitic acid	PDHA1	5160	CCCCCCCCCCCCCCCC(=O)[O-]
DZ	hexadecanoicacid/palmitic acid	PDK4	5166	CCCCCCCCCCCCCCCC(=O)[O-]
DZ	hexadecanoicacid/palmitic acid	PFKM	5213	CCCCCCCCCCCCCCCC(=O)[O-]
DZ	hexadecanoicacid/palmitic acid	ABCB1	5243	CCCCCCCCCCCCCCCC(=O)[O-]
DZ	hexadecanoicacid/palmitic acid	ABCB1	5243	CCCCCCCCCCCCCCCC(=O)[O-]
DZ	hexadecanoicacid/palmitic acid	ABCB4	5244	CCCCCCCCCCCCCCCC(=O)[O-]
DZ	hexadecanoicacid/palmitic acid	PIK3CA	5290	CCCCCCCCCCCCCCCC(=O)[O-]
DZ	hexadecanoicacid/palmitic acid	PIK3R1	5295	CCCCCCCCCCCCCCCC(=O)[O-]
DZ	hexadecanoicacid/palmitic acid	PIK3R2	5296	CCCCCCCCCCCCCCCC(=O)[O-]
DZ	hexadecanoicacid/palmitic acid	PLA2G1B	5319	CCCCCCCCCCCCCCCC(=O)[O-]
DZ	hexadecanoicacid/palmitic acid	PLA2G4A	5321	CCCCCCCCCCCCCCCC(=O)[O-]
DZ	hexadecanoicacid/palmitic acid	PLCB2	5330	CCCCCCCCCCCCCCCC(=O)[O-]
DZ	hexadecanoicacid/palmitic acid	PLCB3	5331	CCCCCCCCCCCCCCCC(=O)[O-]
DZ	hexadecanoicacid/palmitic acid	PLCB4	5332	CCCCCCCCCCCCCCCC(=O)[O-]
DZ	hexadecanoicacid/palmitic acid	PMCH	5367	CCCCCCCCCCCCCCCC(=O)[O-]
DZ	hexadecanoicacid/palmitic acid	PMP2	5375	CCCCCCCCCCCCCCCC(=O)[O-]
DZ	hexadecanoicacid/palmitic acid	PMP2	5375	CCCCCCCCCCCCCCCC(=O)[O-]
DZ	hexadecanoicacid/palmitic acid	PNLIP	5406	CCCCCCCCCCCCCCCC(=O)[O-]
DZ	hexadecanoicacid/palmitic acid	PNLIP	5406	CCCCCCCCCCCCCCCC(=O)[O-]
DZ	hexadecanoicacid/palmitic acid	PPARA	5465	CCCCCCCCCCCCCCCC(=O)[O-]
DZ	hexadecanoicacid/palmitic acid	PPARA	5465	CCCCCCCCCCCCCCCC(=O)[O-]
DZ	hexadecanoicacid/palmitic acid	PPARG	5468	CCCCCCCCCCCCCCCC(=O)[O-]
DZ	hexadecanoicacid/palmitic acid	MED1	5469	CCCCCCCCCCCCCCCC(=O)[O-]
DZ	hexadecanoicacid/palmitic acid	PPAT	5471	CCCCCCCCCCCCCCCC(=O)[O-]
DZ	hexadecanoicacid/palmitic acid	PPAT	5471	CCCCCCCCCCCCCCCC(=O)[O-]
DZ	hexadecanoicacid/palmitic acid	PPT1	5538	CCCCCCCCCCCCCCCC(=O)[O-]
DZ	hexadecanoicacid/palmitic acid	PPT1	5538	CCCCCCCCCCCCCCCC(=O)[O-]
DZ	hexadecanoicacid/palmitic acid	PRKAA2	5563	CCCCCCCCCCCCCCCC(=O)[O-]
DZ	hexadecanoicacid/palmitic acid	MAPK8	5599	CCCCCCCCCCCCCCCC(=O)[O-]
DZ	hexadecanoicacid/palmitic acid	MAPK8	5599	CCCCCCCCCCCCCCCC(=O)[O-]
DZ	hexadecanoicacid/palmitic acid	MAPK9	5601	CCCCCCCCCCCCCCCC(=O)[O-]
DZ	hexadecanoicacid/palmitic acid	MAPK10	5602	CCCCCCCCCCCCCCCC(=O)[O-]
DZ	hexadecanoicacid/palmitic acid	PRSS1	5644	CCCCCCCCCCCCCCCC(=O)[O-]
DZ	hexadecanoicacid/palmitic acid	PRSS3	5646	CCCCCCCCCCCCCCCC(=O)[O-]
DZ	hexadecanoicacid/palmitic acid	PTAFR	5724	CCCCCCCCCCCCCCCC(=O)[O-]
DZ	hexadecanoicacid/palmitic acid	PTAFR	5724	CCCCCCCCCCCCCCCC(=O)[O-]
DZ	hexadecanoicacid/palmitic acid	PTEN	5728	CCCCCCCCCCCCCCCC(=O)[O-]
DZ	hexadecanoicacid/palmitic acid	PTEN	5728	CCCCCCCCCCCCCCCC(=O)[O-]
DZ	hexadecanoicacid/palmitic acid	PTEN	5728	CCCCCCCCCCCCCCCC(=O)[O-]
DZ	hexadecanoicacid/palmitic acid	PTGDS	5730	CCCCCCCCCCCCCCCC(=O)[O-]
DZ	hexadecanoicacid/palmitic acid	PTGDS	5730	CCCCCCCCCCCCCCCC(=O)[O-]
DZ	hexadecanoicacid/palmitic acid	PTGER1	5731	CCCCCCCCCCCCCCCC(=O)[O-]
DZ	hexadecanoicacid/palmitic acid	PTGER1	5731	CCCCCCCCCCCCCCCC(=O)[O-]
DZ	hexadecanoicacid/palmitic acid	PTGFR	5737	CCCCCCCCCCCCCCCC(=O)[O-]
DZ	hexadecanoicacid/palmitic acid	PTGFR	5737	CCCCCCCCCCCCCCCC(=O)[O-]
DZ	hexadecanoicacid/palmitic acid	PTGS1	5742	CCCCCCCCCCCCCCCC(=O)[O-]
DZ	hexadecanoicacid/palmitic acid	PTGS1	5742	CCCCCCCCCCCCCCCC(=O)[O-]
DZ	hexadecanoicacid/palmitic acid	PTGS2	5743	CCCCCCCCCCCCCCCC(=O)[O-]
DZ	hexadecanoicacid/palmitic acid	PTGS2	5743	CCCCCCCCCCCCCCCC(=O)[O-]
DZ	hexadecanoicacid/palmitic acid	PTPN1	5770	CCCCCCCCCCCCCCCC(=O)[O-]
DZ	hexadecanoicacid/palmitic acid	RAB1A	5861	CCCCCCCCCCCCCCCC(=O)[O-]
DZ	hexadecanoicacid/palmitic acid	RBP1	5947	CCCCCCCCCCCCCCCC(=O)[O-]
DZ	hexadecanoicacid/palmitic acid	RBP2	5948	CCCCCCCCCCCCCCCC(=O)[O-]
DZ	hexadecanoicacid/palmitic acid	RELA	5970	CCCCCCCCCCCCCCCC(=O)[O-]
DZ	hexadecanoicacid/palmitic acid	REN	5972	CCCCCCCCCCCCCCCC(=O)[O-]
DZ	hexadecanoicacid/palmitic acid	REN	5972	CCCCCCCCCCCCCCCC(=O)[O-]
DZ	hexadecanoicacid/palmitic acid	RGS2	5997	CCCCCCCCCCCCCCCC(=O)[O-]
DZ	hexadecanoicacid/palmitic acid	RHO	6010	CCCCCCCCCCCCCCCC(=O)[O-]
DZ	hexadecanoicacid/palmitic acid	RHO	6010	CCCCCCCCCCCCCCCC(=O)[O-]
DZ	hexadecanoicacid/palmitic acid	RORA	6095	CCCCCCCCCCCCCCCC(=O)[O-]
DZ	hexadecanoicacid/palmitic acid	RPS6KB1	6198	CCCCCCCCCCCCCCCC(=O)[O-]
DZ	hexadecanoicacid/palmitic acid	RXRA	6256	CCCCCCCCCCCCCCCC(=O)[O-]
DZ	hexadecanoicacid/palmitic acid	RXRA	6256	CCCCCCCCCCCCCCCC(=O)[O-]
DZ	hexadecanoicacid/palmitic acid	SCD	6319	CCCCCCCCCCCCCCCC(=O)[O-]
DZ	hexadecanoicacid/palmitic acid	SCD	6319	CCCCCCCCCCCCCCCC(=O)[O-]
DZ	hexadecanoicacid/palmitic acid	SCP2	6342	CCCCCCCCCCCCCCCC(=O)[O-]
DZ	hexadecanoicacid/palmitic acid	CCL2	6347	CCCCCCCCCCCCCCCC(=O)[O-]
DZ	hexadecanoicacid/palmitic acid	CCL2	6347	CCCCCCCCCCCCCCCC(=O)[O-]
DZ	hexadecanoicacid/palmitic acid	XCL1	6375	CCCCCCCCCCCCCCCC(=O)[O-]
DZ	hexadecanoicacid/palmitic acid	TRAPPC2	6399	CCCCCCCCCCCCCCCC(=O)[O-]
DZ	hexadecanoicacid/palmitic acid	SFTPB	6439	CCCCCCCCCCCCCCCC(=O)[O-]
DZ	hexadecanoicacid/palmitic acid	SFTPC	6440	CCCCCCCCCCCCCCCC(=O)[O-]
DZ	hexadecanoicacid/palmitic acid	SLC2A2	6514	CCCCCCCCCCCCCCCC(=O)[O-]
DZ	hexadecanoicacid/palmitic acid	SLC2A2	6514	CCCCCCCCCCCCCCCC(=O)[O-]
DZ	hexadecanoicacid/palmitic acid	SLC2A4	6517	CCCCCCCCCCCCCCCC(=O)[O-]
DZ	hexadecanoicacid/palmitic acid	SLC22A5	6584	CCCCCCCCCCCCCCCC(=O)[O-]
DZ	hexadecanoicacid/palmitic acid	SLC22A5	6584	CCCCCCCCCCCCCCCC(=O)[O-]
DZ	hexadecanoicacid/palmitic acid	SMARCD3	6604	CCCCCCCCCCCCCCCC(=O)[O-]
DZ	hexadecanoicacid/palmitic acid	SMARCD3	6604	CCCCCCCCCCCCCCCC(=O)[O-]
DZ	hexadecanoicacid/palmitic acid	SIGLEC1	6614	CCCCCCCCCCCCCCCC(=O)[O-]
DZ	hexadecanoicacid/palmitic acid	SOD2	6648	CCCCCCCCCCCCCCCC(=O)[O-]
DZ	hexadecanoicacid/palmitic acid	SP1	6667	CCCCCCCCCCCCCCCC(=O)[O-]
DZ	hexadecanoicacid/palmitic acid	SREBF1	6720	CCCCCCCCCCCCCCCC(=O)[O-]
DZ	hexadecanoicacid/palmitic acid	SREBF1	6720	CCCCCCCCCCCCCCCC(=O)[O-]
DZ	hexadecanoicacid/palmitic acid	SREBF2	6721	CCCCCCCCCCCCCCCC(=O)[O-]
DZ	hexadecanoicacid/palmitic acid	SST	6750	CCCCCCCCCCCCCCCC(=O)[O-]
DZ	hexadecanoicacid/palmitic acid	SULT2A1	6822	CCCCCCCCCCCCCCCC(=O)[O-]
DZ	hexadecanoicacid/palmitic acid	MED22	6837	CCCCCCCCCCCCCCCC(=O)[O-]
DZ	hexadecanoicacid/palmitic acid	XCL2	6846	CCCCCCCCCCCCCCCC(=O)[O-]
DZ	hexadecanoicacid/palmitic acid	TAC1	6863	CCCCCCCCCCCCCCCC(=O)[O-]
DZ	hexadecanoicacid/palmitic acid	TAC1	6863	CCCCCCCCCCCCCCCC(=O)[O-]
DZ	hexadecanoicacid/palmitic acid	TACR2	6865	CCCCCCCCCCCCCCCC(=O)[O-]
DZ	hexadecanoicacid/palmitic acid	TACR2	6865	CCCCCCCCCCCCCCCC(=O)[O-]
DZ	hexadecanoicacid/palmitic acid	TAC3	6866	CCCCCCCCCCCCCCCC(=O)[O-]
DZ	hexadecanoicacid/palmitic acid	TAC3	6866	CCCCCCCCCCCCCCCC(=O)[O-]
DZ	hexadecanoicacid/palmitic acid	TACR1	6869	CCCCCCCCCCCCCCCC(=O)[O-]
DZ	hexadecanoicacid/palmitic acid	TACR1	6869	CCCCCCCCCCCCCCCC(=O)[O-]
DZ	hexadecanoicacid/palmitic acid	TACR3	6870	CCCCCCCCCCCCCCCC(=O)[O-]
DZ	hexadecanoicacid/palmitic acid	TACR3	6870	CCCCCCCCCCCCCCCC(=O)[O-]
DZ	hexadecanoicacid/palmitic acid	TBL1X	6907	CCCCCCCCCCCCCCCC(=O)[O-]
DZ	hexadecanoicacid/palmitic acid	TBXA2R	6915	CCCCCCCCCCCCCCCC(=O)[O-]
DZ	hexadecanoicacid/palmitic acid	TBXA2R	6915	CCCCCCCCCCCCCCCC(=O)[O-]
DZ	hexadecanoicacid/palmitic acid	TEAD1	7003	CCCCCCCCCCCCCCCC(=O)[O-]
DZ	hexadecanoicacid/palmitic acid	TEAD4	7004	CCCCCCCCCCCCCCCC(=O)[O-]
DZ	hexadecanoicacid/palmitic acid	TEAD3	7005	CCCCCCCCCCCCCCCC(=O)[O-]
DZ	hexadecanoicacid/palmitic acid	TLR2	7097	CCCCCCCCCCCCCCCC(=O)[O-]
DZ	hexadecanoicacid/palmitic acid	TLR2	7097	CCCCCCCCCCCCCCCC(=O)[O-]
DZ	hexadecanoicacid/palmitic acid	TLR2	7097	CCCCCCCCCCCCCCCC(=O)[O-]
DZ	hexadecanoicacid/palmitic acid	TLR4	7099	CCCCCCCCCCCCCCCC(=O)[O-]
DZ	hexadecanoicacid/palmitic acid	TLR4	7099	CCCCCCCCCCCCCCCC(=O)[O-]
DZ	hexadecanoicacid/palmitic acid	TNF	7124	CCCCCCCCCCCCCCCC(=O)[O-]
DZ	hexadecanoicacid/palmitic acid	TNF	7124	CCCCCCCCCCCCCCCC(=O)[O-]
DZ	hexadecanoicacid/palmitic acid	TNF	7124	CCCCCCCCCCCCCCCC(=O)[O-]
DZ	hexadecanoicacid/palmitic acid	TNF	7124	CCCCCCCCCCCCCCCC(=O)[O-]
DZ	hexadecanoicacid/palmitic acid	TRH	7200	CCCCCCCCCCCCCCCC(=O)[O-]
DZ	hexadecanoicacid/palmitic acid	TRH	7200	CCCCCCCCCCCCCCCC(=O)[O-]
DZ	hexadecanoicacid/palmitic acid	TRHR	7201	CCCCCCCCCCCCCCCC(=O)[O-]
DZ	hexadecanoicacid/palmitic acid	TRHR	7201	CCCCCCCCCCCCCCCC(=O)[O-]
DZ	hexadecanoicacid/palmitic acid	TXNRD1	7296	CCCCCCCCCCCCCCCC(=O)[O-]
DZ	hexadecanoicacid/palmitic acid	UCP1	7350	CCCCCCCCCCCCCCCC(=O)[O-]
DZ	hexadecanoicacid/palmitic acid	UCP2	7351	CCCCCCCCCCCCCCCC(=O)[O-]
DZ	hexadecanoicacid/palmitic acid	UCP2	7351	CCCCCCCCCCCCCCCC(=O)[O-]
DZ	hexadecanoicacid/palmitic acid	UCP3	7352	CCCCCCCCCCCCCCCC(=O)[O-]
DZ	hexadecanoicacid/palmitic acid	UCP3	7352	CCCCCCCCCCCCCCCC(=O)[O-]
DZ	hexadecanoicacid/palmitic acid	UROD	7389	CCCCCCCCCCCCCCCC(=O)[O-]
DZ	hexadecanoicacid/palmitic acid	XBP1	7494	CCCCCCCCCCCCCCCC(=O)[O-]
DZ	hexadecanoicacid/palmitic acid	XBP1	7494	CCCCCCCCCCCCCCCC(=O)[O-]
DZ	hexadecanoicacid/palmitic acid	GPR68	8111	CCCCCCCCCCCCCCCC(=O)[O-]
DZ	hexadecanoicacid/palmitic acid	GPR68	8111	CCCCCCCCCCCCCCCC(=O)[O-]
DZ	hexadecanoicacid/palmitic acid	NCOA3	8202	CCCCCCCCCCCCCCCC(=O)[O-]
DZ	hexadecanoicacid/palmitic acid	GNPAT	8443	CCCCCCCCCCCCCCCC(=O)[O-]
DZ	hexadecanoicacid/palmitic acid	GNPAT	8443	CCCCCCCCCCCCCCCC(=O)[O-]
DZ	hexadecanoicacid/palmitic acid	TEAD2	8463	CCCCCCCCCCCCCCCC(=O)[O-]
DZ	hexadecanoicacid/palmitic acid	GPR65	8477	CCCCCCCCCCCCCCCC(=O)[O-]
DZ	hexadecanoicacid/palmitic acid	GPR65	8477	CCCCCCCCCCCCCCCC(=O)[O-]
DZ	hexadecanoicacid/palmitic acid	PIK3R3	8503	CCCCCCCCCCCCCCCC(=O)[O-]
DZ	hexadecanoicacid/palmitic acid	AGPS	8540	CCCCCCCCCCCCCCCC(=O)[O-]
DZ	hexadecanoicacid/palmitic acid	AGPS	8540	CCCCCCCCCCCCCCCC(=O)[O-]
DZ	hexadecanoicacid/palmitic acid	NPFF	8620	CCCCCCCCCCCCCCCC(=O)[O-]
DZ	hexadecanoicacid/palmitic acid	NPFF	8620	CCCCCCCCCCCCCCCC(=O)[O-]
DZ	hexadecanoicacid/palmitic acid	NCOA1	8648	CCCCCCCCCCCCCCCC(=O)[O-]
DZ	hexadecanoicacid/palmitic acid	DGAT1	8694	CCCCCCCCCCCCCCCC(=O)[O-]
DZ	hexadecanoicacid/palmitic acid	TNFRSF25	8718	CCCCCCCCCCCCCCCC(=O)[O-]
DZ	hexadecanoicacid/palmitic acid	TNFRSF10B	8795	CCCCCCCCCCCCCCCC(=O)[O-]
DZ	hexadecanoicacid/palmitic acid	TNFRSF10A	8797	CCCCCCCCCCCCCCCC(=O)[O-]
DZ	hexadecanoicacid/palmitic acid	PEX11A	8800	CCCCCCCCCCCCCCCC(=O)[O-]
DZ	hexadecanoicacid/palmitic acid	HDAC3	8841	CCCCCCCCCCCCCCCC(=O)[O-]
DZ	hexadecanoicacid/palmitic acid	F2RL3	9002	CCCCCCCCCCCCCCCC(=O)[O-]
DZ	hexadecanoicacid/palmitic acid	F2RL3	9002	CCCCCCCCCCCCCCCC(=O)[O-]
DZ	hexadecanoicacid/palmitic acid	PCSK7	9159	CCCCCCCCCCCCCCCC(=O)[O-]
DZ	hexadecanoicacid/palmitic acid	LPAR2	9170	CCCCCCCCCCCCCCCC(=O)[O-]
DZ	hexadecanoicacid/palmitic acid	LPAR2	9170	CCCCCCCCCCCCCCCC(=O)[O-]
DZ	hexadecanoicacid/palmitic acid	MED14	9282	CCCCCCCCCCCCCCCC(=O)[O-]
DZ	hexadecanoicacid/palmitic acid	ADIPOQ	9370	CCCCCCCCCCCCCCCC(=O)[O-]
DZ	hexadecanoicacid/palmitic acid	PPT2	9374	CCCCCCCCCCCCCCCC(=O)[O-]
DZ	hexadecanoicacid/palmitic acid	MED21	9412	CCCCCCCCCCCCCCCC(=O)[O-]
DZ	hexadecanoicacid/palmitic acid	FADS2	9415	CCCCCCCCCCCCCCCC(=O)[O-]
DZ	hexadecanoicacid/palmitic acid	MED23	9439	CCCCCCCCCCCCCCCC(=O)[O-]
DZ	hexadecanoicacid/palmitic acid	MED17	9440	CCCCCCCCCCCCCCCC(=O)[O-]
DZ	hexadecanoicacid/palmitic acid	MED26	9441	CCCCCCCCCCCCCCCC(=O)[O-]
DZ	hexadecanoicacid/palmitic acid	MED27	9442	CCCCCCCCCCCCCCCC(=O)[O-]
DZ	hexadecanoicacid/palmitic acid	MED7	9443	CCCCCCCCCCCCCCCC(=O)[O-]
DZ	hexadecanoicacid/palmitic acid	EIF2AK3	9451	CCCCCCCCCCCCCCCC(=O)[O-]
DZ	hexadecanoicacid/palmitic acid	MED20	9477	CCCCCCCCCCCCCCCC(=O)[O-]
DZ	hexadecanoicacid/palmitic acid	CLOCK	9575	CCCCCCCCCCCCCCCC(=O)[O-]
DZ	hexadecanoicacid/palmitic acid	NCOR1	9611	CCCCCCCCCCCCCCCC(=O)[O-]
DZ	hexadecanoicacid/palmitic acid	NCOR2	9612	CCCCCCCCCCCCCCCC(=O)[O-]
DZ	hexadecanoicacid/palmitic acid	GNA14	9630	CCCCCCCCCCCCCCCC(=O)[O-]
DZ	hexadecanoicacid/palmitic acid	GNA14	9630	CCCCCCCCCCCCCCCC(=O)[O-]
DZ	hexadecanoicacid/palmitic acid	MED24	9862	CCCCCCCCCCCCCCCC(=O)[O-]
DZ	hexadecanoicacid/palmitic acid	TBC1D4	9882	CCCCCCCCCCCCCCCC(=O)[O-]
DZ	hexadecanoicacid/palmitic acid	MED12	9968	CCCCCCCCCCCCCCCC(=O)[O-]
DZ	hexadecanoicacid/palmitic acid	MED13	9969	CCCCCCCCCCCCCCCC(=O)[O-]
DZ	hexadecanoicacid/palmitic acid	MED6	10001	CCCCCCCCCCCCCCCC(=O)[O-]
DZ	hexadecanoicacid/palmitic acid	ACOT8	10005	CCCCCCCCCCCCCCCC(=O)[O-]
DZ	hexadecanoicacid/palmitic acid	ACOT8	10005	CCCCCCCCCCCCCCCC(=O)[O-]
DZ	hexadecanoicacid/palmitic acid	MED16	10025	CCCCCCCCCCCCCCCC(=O)[O-]
DZ	hexadecanoicacid/palmitic acid	LPAR6	10161	CCCCCCCCCCCCCCCC(=O)[O-]
DZ	hexadecanoicacid/palmitic acid	LPAR6	10161	CCCCCCCCCCCCCCCC(=O)[O-]
DZ	hexadecanoicacid/palmitic acid	RGS19	10287	CCCCCCCCCCCCCCCC(=O)[O-]
DZ	hexadecanoicacid/palmitic acid	NMUR1	10316	CCCCCCCCCCCCCCCC(=O)[O-]
DZ	hexadecanoicacid/palmitic acid	YAP1	10413	CCCCCCCCCCCCCCCC(=O)[O-]
DZ	hexadecanoicacid/palmitic acid	LYPLA1	10434	CCCCCCCCCCCCCCCC(=O)[O-]
DZ	hexadecanoicacid/palmitic acid	LYPLA1	10434	CCCCCCCCCCCCCCCC(=O)[O-]
DZ	hexadecanoicacid/palmitic acid	CARM1	10498	CCCCCCCCCCCCCCCC(=O)[O-]
DZ	hexadecanoicacid/palmitic acid	CARM1	10498	CCCCCCCCCCCCCCCC(=O)[O-]
DZ	hexadecanoicacid/palmitic acid	NCOA2	10499	CCCCCCCCCCCCCCCC(=O)[O-]
DZ	hexadecanoicacid/palmitic acid	NCOA2	10499	CCCCCCCCCCCCCCCC(=O)[O-]
DZ	hexadecanoicacid/palmitic acid	MYBBP1A	10514	CCCCCCCCCCCCCCCC(=O)[O-]
DZ	hexadecanoicacid/palmitic acid	ERN2	10595	CCCCCCCCCCCCCCCC(=O)[O-]
DZ	hexadecanoicacid/palmitic acid	TXNIP	10628	CCCCCCCCCCCCCCCC(=O)[O-]
DZ	hexadecanoicacid/palmitic acid	CYSLTR1	10800	CCCCCCCCCCCCCCCC(=O)[O-]
DZ	hexadecanoicacid/palmitic acid	CYSLTR1	10800	CCCCCCCCCCCCCCCC(=O)[O-]
DZ	hexadecanoicacid/palmitic acid	NMU	10874	CCCCCCCCCCCCCCCC(=O)[O-]
DZ	hexadecanoicacid/palmitic acid	NPFFR2	10886	CCCCCCCCCCCCCCCC(=O)[O-]
DZ	hexadecanoicacid/palmitic acid	NPFFR2	10886	CCCCCCCCCCCCCCCC(=O)[O-]
DZ	hexadecanoicacid/palmitic acid	PROKR1	10887	CCCCCCCCCCCCCCCC(=O)[O-]
DZ	hexadecanoicacid/palmitic acid	PROKR1	10887	CCCCCCCCCCCCCCCC(=O)[O-]
DZ	hexadecanoicacid/palmitic acid	PPARGC1A	10891	CCCCCCCCCCCCCCCC(=O)[O-]
DZ	hexadecanoicacid/palmitic acid	PPARGC1A	10891	CCCCCCCCCCCCCCCC(=O)[O-]
DZ	hexadecanoicacid/palmitic acid	UTS2	10911	CCCCCCCCCCCCCCCC(=O)[O-]
DZ	hexadecanoicacid/palmitic acid	UTS2	10911	CCCCCCCCCCCCCCCC(=O)[O-]
DZ	hexadecanoicacid/palmitic acid	ACOT2	10965	CCCCCCCCCCCCCCCC(=O)[O-]
DZ	hexadecanoicacid/palmitic acid	SLC27A4	10999	CCCCCCCCCCCCCCCC(=O)[O-]
DZ	hexadecanoicacid/palmitic acid	SLC27A2	11001	CCCCCCCCCCCCCCCC(=O)[O-]
DZ	hexadecanoicacid/palmitic acid	SLC27A2	11001	CCCCCCCCCCCCCCCC(=O)[O-]
DZ	hexadecanoicacid/palmitic acid	GLIPR1	11010	CCCCCCCCCCCCCCCC(=O)[O-]
DZ	hexadecanoicacid/palmitic acid	ACOT7	11332	CCCCCCCCCCCCCCCC(=O)[O-]
DZ	hexadecanoicacid/palmitic acid	ACOT7	11332	CCCCCCCCCCCCCCCC(=O)[O-]
DZ	hexadecanoicacid/palmitic acid	NCOA6	23054	CCCCCCCCCCCCCCCC(=O)[O-]
DZ	hexadecanoicacid/palmitic acid	NCOA6	23054	CCCCCCCCCCCCCCCC(=O)[O-]
DZ	hexadecanoicacid/palmitic acid	CDK19	23097	CCCCCCCCCCCCCCCC(=O)[O-]
DZ	hexadecanoicacid/palmitic acid	RGL1	23179	CCCCCCCCCCCCCCCC(=O)[O-]
DZ	hexadecanoicacid/palmitic acid	ACSBG1	23205	CCCCCCCCCCCCCCCC(=O)[O-]
DZ	hexadecanoicacid/palmitic acid	ACSBG1	23205	CCCCCCCCCCCCCCCC(=O)[O-]
DZ	hexadecanoicacid/palmitic acid	TBC1D1	23216	CCCCCCCCCCCCCCCC(=O)[O-]
DZ	hexadecanoicacid/palmitic acid	TBC1D1	23216	CCCCCCCCCCCCCCCC(=O)[O-]
DZ	hexadecanoicacid/palmitic acid	PLCB1	23236	CCCCCCCCCCCCCCCC(=O)[O-]
DZ	hexadecanoicacid/palmitic acid	ACSL6	23305	CCCCCCCCCCCCCCCC(=O)[O-]
DZ	hexadecanoicacid/palmitic acid	ACSL6	23305	CCCCCCCCCCCCCCCC(=O)[O-]
DZ	hexadecanoicacid/palmitic acid	MED13L	23389	CCCCCCCCCCCCCCCC(=O)[O-]
DZ	hexadecanoicacid/palmitic acid	ZDHHC17	23390	CCCCCCCCCCCCCCCC(=O)[O-]
DZ	hexadecanoicacid/palmitic acid	SIRT1	23411	CCCCCCCCCCCCCCCC(=O)[O-]
DZ	hexadecanoicacid/palmitic acid	MLYCD	23417	CCCCCCCCCCCCCCCC(=O)[O-]
DZ	hexadecanoicacid/palmitic acid	SEC14L2	23541	CCCCCCCCCCCCCCCC(=O)[O-]
DZ	hexadecanoicacid/palmitic acid	SEC14L2	23541	CCCCCCCCCCCCCCCC(=O)[O-]
DZ	hexadecanoicacid/palmitic acid	LPAR3	23566	CCCCCCCCCCCCCCCC(=O)[O-]
DZ	hexadecanoicacid/palmitic acid	LPAR3	23566	CCCCCCCCCCCCCCCC(=O)[O-]
DZ	hexadecanoicacid/palmitic acid	NTSR2	23620	CCCCCCCCCCCCCCCC(=O)[O-]
DZ	hexadecanoicacid/palmitic acid	NTSR2	23620	CCCCCCCCCCCCCCCC(=O)[O-]
DZ	hexadecanoicacid/palmitic acid	WWTR1	25937	CCCCCCCCCCCCCCCC(=O)[O-]
DZ	hexadecanoicacid/palmitic acid	SIN3A	25942	CCCCCCCCCCCCCCCC(=O)[O-]
DZ	hexadecanoicacid/palmitic acid	SIN3A	25942	CCCCCCCCCCCCCCCC(=O)[O-]
DZ	hexadecanoicacid/palmitic acid	TIAM2	26230	CCCCCCCCCCCCCCCC(=O)[O-]
DZ	hexadecanoicacid/palmitic acid	CLEC4E	26253	CCCCCCCCCCCCCCCC(=O)[O-]
DZ	hexadecanoicacid/palmitic acid	ANKRD1	27063	CCCCCCCCCCCCCCCC(=O)[O-]
DZ	hexadecanoicacid/palmitic acid	TRAPPC3	27095	CCCCCCCCCCCCCCCC(=O)[O-]
DZ	hexadecanoicacid/palmitic acid	TRAPPC3	27095	CCCCCCCCCCCCCCCC(=O)[O-]
DZ	hexadecanoicacid/palmitic acid	TRAPPC3	27095	CCCCCCCCCCCCCCCC(=O)[O-]
DZ	hexadecanoicacid/palmitic acid	TNFRSF21	27242	CCCCCCCCCCCCCCCC(=O)[O-]
DZ	hexadecanoicacid/palmitic acid	P2RY10	27334	CCCCCCCCCCCCCCCC(=O)[O-]
DZ	hexadecanoicacid/palmitic acid	P2RY10	27334	CCCCCCCCCCCCCCCC(=O)[O-]
DZ	hexadecanoicacid/palmitic acid	TRBV2	28620	CCCCCCCCCCCCCCCC(=O)[O-]
DZ	hexadecanoicacid/palmitic acid	MED4	29079	CCCCCCCCCCCCCCCC(=O)[O-]
DZ	hexadecanoicacid/palmitic acid	GRHL1	29841	CCCCCCCCCCCCCCCC(=O)[O-]
DZ	hexadecanoicacid/palmitic acid	GPR132	29933	CCCCCCCCCCCCCCCC(=O)[O-]
DZ	hexadecanoicacid/palmitic acid	GPR132	29933	CCCCCCCCCCCCCCCC(=O)[O-]
DZ	hexadecanoicacid/palmitic acid	G0S2	50486	CCCCCCCCCCCCCCCC(=O)[O-]
DZ	hexadecanoicacid/palmitic acid	NOX4	50507	CCCCCCCCCCCCCCCC(=O)[O-]
DZ	hexadecanoicacid/palmitic acid	MED31	51003	CCCCCCCCCCCCCCCC(=O)[O-]
DZ	hexadecanoicacid/palmitic acid	MLXIPL	51085	CCCCCCCCCCCCCCCC(=O)[O-]
DZ	hexadecanoicacid/palmitic acid	ZDHHC9	51114	CCCCCCCCCCCCCCCC(=O)[O-]
DZ	hexadecanoicacid/palmitic acid	GOLGA7	51125	CCCCCCCCCCCCCCCC(=O)[O-]
DZ	hexadecanoicacid/palmitic acid	ANGPTL4	51129	CCCCCCCCCCCCCCCC(=O)[O-]
DZ	hexadecanoicacid/palmitic acid	CYB5R4	51167	CCCCCCCCCCCCCCCC(=O)[O-]
DZ	hexadecanoicacid/palmitic acid	ZDHHC2	51201	CCCCCCCCCCCCCCCC(=O)[O-]
DZ	hexadecanoicacid/palmitic acid	TRAPPC4	51399	CCCCCCCCCCCCCCCC(=O)[O-]
DZ	hexadecanoicacid/palmitic acid	ISYNA1	51477	CCCCCCCCCCCCCCCC(=O)[O-]
DZ	hexadecanoicacid/palmitic acid	MED15	51586	CCCCCCCCCCCCCCCC(=O)[O-]
DZ	hexadecanoicacid/palmitic acid	ACSL5	51703	CCCCCCCCCCCCCCCC(=O)[O-]
DZ	hexadecanoicacid/palmitic acid	ACSL5	51703	CCCCCCCCCCCCCCCC(=O)[O-]
DZ	hexadecanoicacid/palmitic acid	ACSL5	51703	CCCCCCCCCCCCCCCC(=O)[O-]
DZ	hexadecanoicacid/palmitic acid	GNG2	54331	CCCCCCCCCCCCCCCC(=O)[O-]
DZ	hexadecanoicacid/palmitic acid	GNG2	54331	CCCCCCCCCCCCCCCC(=O)[O-]
DZ	hexadecanoicacid/palmitic acid	ZDHHC13	54503	CCCCCCCCCCCCCCCC(=O)[O-]
DZ	hexadecanoicacid/palmitic acid	UGT1A9	54600	CCCCCCCCCCCCCCCC(=O)[O-]
DZ	hexadecanoicacid/palmitic acid	PDP1	54704	CCCCCCCCCCCCCCCC(=O)[O-]
DZ	hexadecanoicacid/palmitic acid	MED18	54797	CCCCCCCCCCCCCCCC(=O)[O-]
DZ	hexadecanoicacid/palmitic acid	MED9	55090	CCCCCCCCCCCCCCCC(=O)[O-]
DZ	hexadecanoicacid/palmitic acid	MED29	55588	CCCCCCCCCCCCCCCC(=O)[O-]
DZ	hexadecanoicacid/palmitic acid	FAR2	55711	CCCCCCCCCCCCCCCC(=O)[O-]
DZ	hexadecanoicacid/palmitic acid	LTB4R2	56413	CCCCCCCCCCCCCCCC(=O)[O-]
DZ	hexadecanoicacid/palmitic acid	LTB4R2	56413	CCCCCCCCCCCCCCCC(=O)[O-]
DZ	hexadecanoicacid/palmitic acid	ASAH2	56624	CCCCCCCCCCCCCCCC(=O)[O-]
DZ	hexadecanoicacid/palmitic acid	NMUR2	56923	CCCCCCCCCCCCCCCC(=O)[O-]
DZ	hexadecanoicacid/palmitic acid	CYSLTR2	57105	CCCCCCCCCCCCCCCC(=O)[O-]
DZ	hexadecanoicacid/palmitic acid	CYSLTR2	57105	CCCCCCCCCCCCCCCC(=O)[O-]
DZ	hexadecanoicacid/palmitic acid	GJD2	57369	CCCCCCCCCCCCCCCC(=O)[O-]
DZ	hexadecanoicacid/palmitic acid	ABHD6	57406	CCCCCCCCCCCCCCCC(=O)[O-]
DZ	hexadecanoicacid/palmitic acid	CALCOCO1	57658	CCCCCCCCCCCCCCCC(=O)[O-]
DZ	hexadecanoicacid/palmitic acid	TRIB3	57761	CCCCCCCCCCCCCCCC(=O)[O-]
DZ	hexadecanoicacid/palmitic acid	TRAPPC1	58485	CCCCCCCCCCCCCCCC(=O)[O-]
DZ	hexadecanoicacid/palmitic acid	TRAPPC1	58485	CCCCCCCCCCCCCCCC(=O)[O-]
DZ	hexadecanoicacid/palmitic acid	PROK2	60675	CCCCCCCCCCCCCCCC(=O)[O-]
DZ	hexadecanoicacid/palmitic acid	PROK2	60675	CCCCCCCCCCCCCCCC(=O)[O-]
DZ	hexadecanoicacid/palmitic acid	NPFFR1	64106	CCCCCCCCCCCCCCCC(=O)[O-]
DZ	hexadecanoicacid/palmitic acid	NPFFR1	64106	CCCCCCCCCCCCCCCC(=O)[O-]
DZ	hexadecanoicacid/palmitic acid	RGS18	64407	CCCCCCCCCCCCCCCC(=O)[O-]
DZ	hexadecanoicacid/palmitic acid	ELOVL1	64834	CCCCCCCCCCCCCCCC(=O)[O-]
DZ	hexadecanoicacid/palmitic acid	ELOVL1	64834	CCCCCCCCCCCCCCCC(=O)[O-]
DZ	hexadecanoicacid/palmitic acid	ELOVL6	79071	CCCCCCCCCCCCCCCC(=O)[O-]
DZ	hexadecanoicacid/palmitic acid	ELOVL6	79071	CCCCCCCCCCCCCCCC(=O)[O-]
DZ	hexadecanoicacid/palmitic acid	TRAPPC6A	79090	CCCCCCCCCCCCCCCC(=O)[O-]
DZ	hexadecanoicacid/palmitic acid	FA2H	79152	CCCCCCCCCCCCCCCC(=O)[O-]
DZ	hexadecanoicacid/palmitic acid	ADIPOR2	79602	CCCCCCCCCCCCCCCC(=O)[O-]
DZ	hexadecanoicacid/palmitic acid	ADIPOR2	79602	CCCCCCCCCCCCCCCC(=O)[O-]
DZ	hexadecanoicacid/palmitic acid	TBL1XR1	79718	CCCCCCCCCCCCCCCC(=O)[O-]
DZ	hexadecanoicacid/palmitic acid	TBL1XR1	79718	CCCCCCCCCCCCCCCC(=O)[O-]
DZ	hexadecanoicacid/palmitic acid	TBL1XR1	79718	CCCCCCCCCCCCCCCC(=O)[O-]
DZ	hexadecanoicacid/palmitic acid	CHD9	80205	CCCCCCCCCCCCCCCC(=O)[O-]
DZ	hexadecanoicacid/palmitic acid	CHD9	80205	CCCCCCCCCCCCCCCC(=O)[O-]
DZ	hexadecanoicacid/palmitic acid	ACSBG2	81616	CCCCCCCCCCCCCCCC(=O)[O-]
DZ	hexadecanoicacid/palmitic acid	ACSBG2	81616	CCCCCCCCCCCCCCCC(=O)[O-]
DZ	hexadecanoicacid/palmitic acid	MED25	81857	CCCCCCCCCCCCCCCC(=O)[O-]
DZ	hexadecanoicacid/palmitic acid	MED25	81857	CCCCCCCCCCCCCCCC(=O)[O-]
DZ	hexadecanoicacid/palmitic acid	RAB1B	81876	CCCCCCCCCCCCCCCC(=O)[O-]
DZ	hexadecanoicacid/palmitic acid	QRFPR	84109	CCCCCCCCCCCCCCCC(=O)[O-]
DZ	hexadecanoicacid/palmitic acid	QRFPR	84109	CCCCCCCCCCCCCCCC(=O)[O-]
DZ	hexadecanoicacid/palmitic acid	FAR1	84188	CCCCCCCCCCCCCCCC(=O)[O-]
DZ	hexadecanoicacid/palmitic acid	MED10	84246	CCCCCCCCCCCCCCCC(=O)[O-]
DZ	hexadecanoicacid/palmitic acid	PROK1	84432	CCCCCCCCCCCCCCCC(=O)[O-]
DZ	hexadecanoicacid/palmitic acid	PROK1	84432	CCCCCCCCCCCCCCCC(=O)[O-]
DZ	hexadecanoicacid/palmitic acid	MCHR2	84539	CCCCCCCCCCCCCCCC(=O)[O-]
DZ	hexadecanoicacid/palmitic acid	KISS1R	84634	CCCCCCCCCCCCCCCC(=O)[O-]
DZ	hexadecanoicacid/palmitic acid	KISS1R	84634	CCCCCCCCCCCCCCCC(=O)[O-]
DZ	hexadecanoicacid/palmitic acid	HELZ2	85441	CCCCCCCCCCCCCCCC(=O)[O-]
DZ	hexadecanoicacid/palmitic acid	MED30	90390	CCCCCCCCCCCCCCCC(=O)[O-]
DZ	hexadecanoicacid/palmitic acid	OPN4	94233	CCCCCCCCCCCCCCCC(=O)[O-]
DZ	hexadecanoicacid/palmitic acid	OPN4	94233	CCCCCCCCCCCCCCCC(=O)[O-]
DZ	hexadecanoicacid/palmitic acid	TGS1	96764	CCCCCCCCCCCCCCCC(=O)[O-]
DZ	hexadecanoicacid/palmitic acid	TGS1	96764	CCCCCCCCCCCCCCCC(=O)[O-]
DZ	hexadecanoicacid/palmitic acid	BIRC8	112401	CCCCCCCCCCCCCCCC(=O)[O-]
DZ	hexadecanoicacid/palmitic acid	MED8	112950	CCCCCCCCCCCCCCCC(=O)[O-]
DZ	hexadecanoicacid/palmitic acid	PIK3IP1	113791	CCCCCCCCCCCCCCCC(=O)[O-]
DZ	hexadecanoicacid/palmitic acid	GNRHR2	114814	CCCCCCCCCCCCCCCC(=O)[O-]
DZ	hexadecanoicacid/palmitic acid	GNRHR2	114814	CCCCCCCCCCCCCCCC(=O)[O-]
DZ	hexadecanoicacid/palmitic acid	ARHGEF25	115557	CCCCCCCCCCCCCCCC(=O)[O-]
DZ	hexadecanoicacid/palmitic acid	APOA5	116519	CCCCCCCCCCCCCCCC(=O)[O-]
DZ	hexadecanoicacid/palmitic acid	TRAPPC6B	122553	CCCCCCCCCCCCCCCC(=O)[O-]
DZ	hexadecanoicacid/palmitic acid	TRAPPC6B	122553	CCCCCCCCCCCCCCCC(=O)[O-]
DZ	hexadecanoicacid/palmitic acid	ACOT4	122970	CCCCCCCCCCCCCCCC(=O)[O-]
DZ	hexadecanoicacid/palmitic acid	ACOT4	122970	CCCCCCCCCCCCCCCC(=O)[O-]
DZ	hexadecanoicacid/palmitic acid	TRAPPC5	126003	CCCCCCCCCCCCCCCC(=O)[O-]
DZ	hexadecanoicacid/palmitic acid	PROKR2	128674	CCCCCCCCCCCCCCCC(=O)[O-]
DZ	hexadecanoicacid/palmitic acid	PROKR2	128674	CCCCCCCCCCCCCCCC(=O)[O-]
DZ	hexadecanoicacid/palmitic acid	NMS	129521	CCCCCCCCCCCCCCCC(=O)[O-]
DZ	hexadecanoicacid/palmitic acid	PRSS58	136541	CCCCCCCCCCCCCCCC(=O)[O-]
DZ	hexadecanoicacid/palmitic acid	PLB1	151056	CCCCCCCCCCCCCCCC(=O)[O-]
DZ	hexadecanoicacid/palmitic acid	GPBAR1	151306	CCCCCCCCCCCCCCCC(=O)[O-]
DZ	hexadecanoicacid/palmitic acid	MED19	219541	CCCCCCCCCCCCCCCC(=O)[O-]
DZ	hexadecanoicacid/palmitic acid	GPRC6A	222545	CCCCCCCCCCCCCCCC(=O)[O-]
DZ	hexadecanoicacid/palmitic acid	GPRC6A	222545	CCCCCCCCCCCCCCCC(=O)[O-]
DZ	hexadecanoicacid/palmitic acid	UTS2B	257313	CCCCCCCCCCCCCCCC(=O)[O-]
DZ	hexadecanoicacid/palmitic acid	UTS2B	257313	CCCCCCCCCCCCCCCC(=O)[O-]
DZ	hexadecanoicacid/palmitic acid	UTS2B	257313	CCCCCCCCCCCCCCCC(=O)[O-]
DZ	hexadecanoicacid/palmitic acid	LIN9	286826	CCCCCCCCCCCCCCCC(=O)[O-]
DZ	hexadecanoicacid/palmitic acid	FFAR4	338557	CCCCCCCCCCCCCCCC(=O)[O-]
DZ	hexadecanoicacid/palmitic acid	FFAR4	338557	CCCCCCCCCCCCCCCC(=O)[O-]
DZ	hexadecanoicacid/palmitic acid	NANOS2	339345	CCCCCCCCCCCCCCCC(=O)[O-]
DZ	hexadecanoicacid/palmitic acid	NANOS2	339345	CCCCCCCCCCCCCCCC(=O)[O-]
DZ	hexadecanoicacid/palmitic acid	QRFP	347148	CCCCCCCCCCCCCCCC(=O)[O-]
DZ	hexadecanoicacid/palmitic acid	QRFP	347148	CCCCCCCCCCCCCCCC(=O)[O-]
DZ	hexadecanoicacid/palmitic acid	SLC27A1	376497	CCCCCCCCCCCCCCCC(=O)[O-]
DZ	hexadecanoicacid/palmitic acid	SLC27A1	376497	CCCCCCCCCCCCCCCC(=O)[O-]
DZ	hexadecanoicacid/palmitic acid	NPSR1	387129	CCCCCCCCCCCCCCCC(=O)[O-]
DZ	hexadecanoicacid/palmitic acid	NPSR1	387129	CCCCCCCCCCCCCCCC(=O)[O-]
DZ	hexadecanoicacid/palmitic acid	SPACA5	389852	CCCCCCCCCCCCCCCC(=O)[O-]
DZ	hexadecanoicacid/palmitic acid	MED11	400569	CCCCCCCCCCCCCCCC(=O)[O-]
DZ	hexadecanoicacid/palmitic acid	ACBD7	414149	CCCCCCCCCCCCCCCC(=O)[O-]
DZ	hexadecanoicacid/palmitic acid	ACBD7	414149	CCCCCCCCCCCCCCCC(=O)[O-]
DZ	hexadecanoicacid/palmitic acid	NPS	594857	CCCCCCCCCCCCCCCC(=O)[O-]
DZ	hexadecanoicacid/palmitic acid	NPS	594857	CCCCCCCCCCCCCCCC(=O)[O-]
DZ	hexadecanoicacid/palmitic acid	ACOT1	641371	CCCCCCCCCCCCCCCC(=O)[O-]
DZ	hexadecanoicacid/palmitic acid	GUSBP1	728411	CCCCCCCCCCCCCCCC(=O)[O-]
DZ	hexadecanoicacid/palmitic acid	Odosp_0765	10252473	CCCCCCCCCCCCCCCC(=O)[O-]
DZ	jujuboside A	CALM3	808	CC1C(C(C(C(O1)OC2C(C(COC2OC3CCC4(C5CCC6C7C(CC(OC78CC6(C5(CCC4C3(C)C)C)CO8)C=C(C)C)(C)O)C)O)OC9C(C(C(C(O9)COC1C(C(C(C(O1)CO)O)O)O)O)O)OC1C(C(C(CO1)O)O)O)O)O)O
DZ	jujuboside A	KRIT1	889	CC1C(C(C(C(O1)OC2C(C(COC2OC3CCC4(C5CCC6C7C(CC(OC78CC6(C5(CCC4C3(C)C)C)CO8)C=C(C)C)(C)O)C)O)OC9C(C(C(C(O9)COC1C(C(C(C(O1)CO)O)O)O)O)O)OC1C(C(C(CO1)O)O)O)O)O)O
DZ	jujuboside A	MARK3	4140	CC1C(C(C(C(O1)OC2C(C(COC2OC3CCC4(C5CCC6C7C(CC(OC78CC6(C5(CCC4C3(C)C)C)CO8)C=C(C)C)(C)O)C)O)OC9C(C(C(C(O9)COC1C(C(C(C(O1)CO)O)O)O)O)O)OC1C(C(C(CO1)O)O)O)O)O)O
DZ	jujuboside A	RPGRIP1	57096	CC1C(C(C(C(O1)OC2C(C(COC2OC3CCC4(C5CCC6C7C(CC(OC78CC6(C5(CCC4C3(C)C)C)CO8)C=C(C)C)(C)O)C)O)OC9C(C(C(C(O9)COC1C(C(C(C(O1)CO)O)O)O)O)O)OC1C(C(C(CO1)O)O)O)O)O)O
DZ	jujuboside B	CYBA	1535	CC1C(C(C(C(O1)OC2C(C(COC2OC3CCC4(C5CCC6C(C5(CCC4C3(C)C)C)CC78C6C(CC(O7)(OC8)C=C(C)C)(C)O)C)O)OC9C(C(C(C(O9)CO)O)O)OC1C(C(C(CO1)O)O)O)O)O)O
DZ	jujuboside B	NOX4	50507	CC1C(C(C(C(O1)OC2C(C(COC2OC3CCC4(C5CCC6C(C5(CCC4C3(C)C)C)CC78C6C(CC(O7)(OC8)C=C(C)C)(C)O)C)O)OC9C(C(C(C(O9)CO)O)O)OC1C(C(C(CO1)O)O)O)O)O)O
DZ	betulonic acid/liquidambaric acid/Betunolic Acid	GPBAR1	151306	CC(=C)[C@@H]1CC[C@]2([C@H]1[C@H]3CC[C@@H]4[C@]5(CCC(=O)C([C@@H]5CC[C@]4([C@@]3(CC2)C)C)(C)C)C)C(=O)[O-]
DZ	lysicamine	ACHE	43	COc1cc2ccnc3c2c(c1OC)-c4ccccc4C3=O
DZ	lysicamine	RB1	5925	COc1cc2ccnc3c2c(c1OC)-c4ccccc4C3=O
DZ	myristic acid	ABL1	25	CCCCCCCCCCCCCC(=O)[O-]
DZ	myristic acid	ACOX1	51	CCCCCCCCCCCCCC(=O)[O-]
DZ	myristic acid	ALB	213	CCCCCCCCCCCCCC(=O)[O-]
DZ	myristic acid	AOAH	313	CCCCCCCCCCCCCC(=O)[O-]
DZ	myristic acid	AIRE	326	CCCCCCCCCCCCCC(=O)[O-]
DZ	myristic acid	ARF1	375	CCCCCCCCCCCCCC(=O)[O-]
DZ	myristic acid	ARF3	377	CCCCCCCCCCCCCC(=O)[O-]
DZ	myristic acid	ARF4	378	CCCCCCCCCCCCCC(=O)[O-]
DZ	myristic acid	ARF6	382	CCCCCCCCCCCCCC(=O)[O-]
DZ	myristic acid	CALM1	801	CCCCCCCCCCCCCC(=O)[O-]
DZ	myristic acid	CALM2	805	CCCCCCCCCCCCCC(=O)[O-]
DZ	myristic acid	CYB5A	1528	CCCCCCCCCCCCCC(=O)[O-]
DZ	myristic acid	CYP3A5	1577	CCCCCCCCCCCCCC(=O)[O-]
DZ	myristic acid	CYP19A1	1588	CCCCCCCCCCCCCC(=O)[O-]
DZ	myristic acid	DECR1	1666	CCCCCCCCCCCCCC(=O)[O-]
DZ	myristic acid	DNM1	1759	CCCCCCCCCCCCCC(=O)[O-]
DZ	myristic acid	FABP2	2169	CCCCCCCCCCCCCC(=O)[O-]
DZ	myristic acid	ACSL3	2181	CCCCCCCCCCCCCC(=O)[O-]
DZ	myristic acid	FASN	2194	CCCCCCCCCCCCCC(=O)[O-]
DZ	myristic acid	FYN	2534	CCCCCCCCCCCCCC(=O)[O-]
DZ	myristic acid	GAP43	2596	CCCCCCCCCCCCCC(=O)[O-]
DZ	myristic acid	GCG	2641	CCCCCCCCCCCCCC(=O)[O-]
DZ	myristic acid	GLI2	2736	CCCCCCCCCCCCCC(=O)[O-]
DZ	myristic acid	GM2A	2760	CCCCCCCCCCCCCC(=O)[O-]
DZ	myristic acid	GNRHR	2798	CCCCCCCCCCCCCC(=O)[O-]
DZ	myristic acid	PDIA3	2923	CCCCCCCCCCCCCC(=O)[O-]
DZ	myristic acid	GUCA1A	2978	CCCCCCCCCCCCCC(=O)[O-]
DZ	myristic acid	HEXA	3073	CCCCCCCCCCCCCC(=O)[O-]
DZ	myristic acid	HEXA	3073	CCCCCCCCCCCCCC(=O)[O-]
DZ	myristic acid	HNF4A	3172	CCCCCCCCCCCCCC(=O)[O-]
DZ	myristic acid	HNMT	3176	CCCCCCCCCCCCCC(=O)[O-]
DZ	myristic acid	IFNG	3458	CCCCCCCCCCCCCC(=O)[O-]
DZ	myristic acid	IFNG	3458	CCCCCCCCCCCCCC(=O)[O-]
DZ	myristic acid	IL1B	3553	CCCCCCCCCCCCCC(=O)[O-]
DZ	myristic acid	IL2	3558	CCCCCCCCCCCCCC(=O)[O-]
DZ	myristic acid	INS	3630	CCCCCCCCCCCCCC(=O)[O-]
DZ	myristic acid	LCAT	3931	CCCCCCCCCCCCCC(=O)[O-]
DZ	myristic acid	MARCKS	4082	CCCCCCCCCCCCCC(=O)[O-]
DZ	myristic acid	MPO	4353	CCCCCCCCCCCCCC(=O)[O-]
DZ	myristic acid	MUSK	4593	CCCCCCCCCCCCCC(=O)[O-]
DZ	myristic acid	NCF2	4688	CCCCCCCCCCCCCC(=O)[O-]
DZ	myristic acid	NMT1	4836	CCCCCCCCCCCCCC(=O)[O-]
DZ	myristic acid	NOS3	4846	CCCCCCCCCCCCCC(=O)[O-]
DZ	myristic acid	PLA2G1B	5319	CCCCCCCCCCCCCC(=O)[O-]
DZ	myristic acid	PPP3CA	5530	CCCCCCCCCCCCCC(=O)[O-]
DZ	myristic acid	PPP3R1	5534	CCCCCCCCCCCCCC(=O)[O-]
DZ	myristic acid	PRKACA	5566	CCCCCCCCCCCCCC(=O)[O-]
DZ	myristic acid	PKIA	5569	CCCCCCCCCCCCCC(=O)[O-]
DZ	myristic acid	PTGS1	5742	CCCCCCCCCCCCCC(=O)[O-]
DZ	myristic acid	PTGS2	5743	CCCCCCCCCCCCCC(=O)[O-]
DZ	myristic acid	PVR	5817	CCCCCCCCCCCCCC(=O)[O-]
DZ	myristic acid	RCVRN	5957	CCCCCCCCCCCCCC(=O)[O-]
DZ	myristic acid	S100B	6285	CCCCCCCCCCCCCC(=O)[O-]
DZ	myristic acid	SCD	6319	CCCCCCCCCCCCCC(=O)[O-]
DZ	myristic acid	SRC	6714	CCCCCCCCCCCCCC(=O)[O-]
DZ	myristic acid	TLR2	7097	CCCCCCCCCCCCCC(=O)[O-]
DZ	myristic acid	TLR4	7099	CCCCCCCCCCCCCC(=O)[O-]
DZ	myristic acid	UROD	7389	CCCCCCCCCCCCCC(=O)[O-]
DZ	myristic acid	ACOX2	8309	CCCCCCCCCCCCCC(=O)[O-]
DZ	myristic acid	NCOA1	8648	CCCCCCCCCCCCCC(=O)[O-]
DZ	myristic acid	NMT2	9397	CCCCCCCCCCCCCC(=O)[O-]
DZ	myristic acid	ECI2	10455	CCCCCCCCCCCCCC(=O)[O-]
DZ	myristic acid	ACOT7	11332	CCCCCCCCCCCCCC(=O)[O-]
DZ	myristic acid	LY96	23643	CCCCCCCCCCCCCC(=O)[O-]
DZ	myristic acid	TRAPPC3	27095	CCCCCCCCCCCCCC(=O)[O-]
DZ	myristic acid	IGF2-AS	51214	CCCCCCCCCCCCCC(=O)[O-]
DZ	myristic acid	APOM	55937	CCCCCCCCCCCCCC(=O)[O-]
DZ	myristic acid	APOM	55937	CCCCCCCCCCCCCC(=O)[O-]
DZ	myristic acid	ABHD6	57406	CCCCCCCCCCCCCC(=O)[O-]
DZ	myristic acid	FA2H	79152	CCCCCCCCCCCCCC(=O)[O-]
DZ	myristic acid	NOX5	79400	CCCCCCCCCCCCCC(=O)[O-]
DZ	myristic acid	ACOT4	122970	CCCCCCCCCCCCCC(=O)[O-]
DZ	myristic acid	FFAR4	338557	CCCCCCCCCCCCCC(=O)[O-]
DZ	myristic acid	FKBP1C	642489	CCCCCCCCCCCCCC(=O)[O-]
DZ	myristic acid	NCF1C	654817	CCCCCCCCCCCCCC(=O)[O-]
DZ	myristicin	ACHE	43	COc1cc(cc2c1OCO2)CC=C
DZ	myristicin	CYP3A4	1576	COc1cc(cc2c1OCO2)CC=C
DZ	myristicin	CYP20A1	57404	COc1cc(cc2c1OCO2)CC=C
DZ	niacin / nicotinic acid	ADORA1	134	c1cc(cnc1)C(=O)[O-]
DZ	niacin / nicotinic acid	ADORA3	140	c1cc(cnc1)C(=O)[O-]
DZ	niacin / nicotinic acid	PARP1	142	c1cc(cnc1)C(=O)[O-]
DZ	niacin / nicotinic acid	ADRA2A	150	c1cc(cnc1)C(=O)[O-]
DZ	niacin / nicotinic acid	ADRA2B	151	c1cc(cnc1)C(=O)[O-]
DZ	niacin / nicotinic acid	ADRA2C	152	c1cc(cnc1)C(=O)[O-]
DZ	niacin / nicotinic acid	AGTR2	186	c1cc(cnc1)C(=O)[O-]
DZ	niacin / nicotinic acid	APLNR	187	c1cc(cnc1)C(=O)[O-]
DZ	niacin / nicotinic acid	ANXA1	301	c1cc(cnc1)C(=O)[O-]
DZ	niacin / nicotinic acid	APOA1	335	c1cc(cnc1)C(=O)[O-]
DZ	niacin / nicotinic acid	APOB	338	c1cc(cnc1)C(=O)[O-]
DZ	niacin / nicotinic acid	APOB	338	c1cc(cnc1)C(=O)[O-]
DZ	niacin / nicotinic acid	APOB	338	c1cc(cnc1)C(=O)[O-]
DZ	niacin / nicotinic acid	APOB	338	c1cc(cnc1)C(=O)[O-]
DZ	niacin / nicotinic acid	APP	351	c1cc(cnc1)C(=O)[O-]
DZ	niacin / nicotinic acid	ATP5B	506	c1cc(cnc1)C(=O)[O-]
DZ	niacin / nicotinic acid	ATP5B	506	c1cc(cnc1)C(=O)[O-]
DZ	niacin / nicotinic acid	BDKRB1	623	c1cc(cnc1)C(=O)[O-]
DZ	niacin / nicotinic acid	BDKRB2	624	c1cc(cnc1)C(=O)[O-]
DZ	niacin / nicotinic acid	BDKRB2	624	c1cc(cnc1)C(=O)[O-]
DZ	niacin / nicotinic acid	CXCR5	643	c1cc(cnc1)C(=O)[O-]
DZ	niacin / nicotinic acid	C3	718	c1cc(cnc1)C(=O)[O-]
DZ	niacin / nicotinic acid	C3AR1	719	c1cc(cnc1)C(=O)[O-]
DZ	niacin / nicotinic acid	C5	727	c1cc(cnc1)C(=O)[O-]
DZ	niacin / nicotinic acid	C5AR1	728	c1cc(cnc1)C(=O)[O-]
DZ	niacin / nicotinic acid	CASR	846	c1cc(cnc1)C(=O)[O-]
DZ	niacin / nicotinic acid	CETP	1071	c1cc(cnc1)C(=O)[O-]
DZ	niacin / nicotinic acid	CHRM2	1129	c1cc(cnc1)C(=O)[O-]
DZ	niacin / nicotinic acid	CHRM4	1132	c1cc(cnc1)C(=O)[O-]
DZ	niacin / nicotinic acid	CCR1	1230	c1cc(cnc1)C(=O)[O-]
DZ	niacin / nicotinic acid	CCR3	1232	c1cc(cnc1)C(=O)[O-]
DZ	niacin / nicotinic acid	CCR5	1234	c1cc(cnc1)C(=O)[O-]
DZ	niacin / nicotinic acid	CCR6	1235	c1cc(cnc1)C(=O)[O-]
DZ	niacin / nicotinic acid	CCR7	1236	c1cc(cnc1)C(=O)[O-]
DZ	niacin / nicotinic acid	CCR8	1237	c1cc(cnc1)C(=O)[O-]
DZ	niacin / nicotinic acid	CSN1S1	1446	c1cc(cnc1)C(=O)[O-]
DZ	niacin / nicotinic acid	CYP1A2	1544	c1cc(cnc1)C(=O)[O-]
DZ	niacin / nicotinic acid	CYP2C19	1557	c1cc(cnc1)C(=O)[O-]
DZ	niacin / nicotinic acid	CYP2C9	1559	c1cc(cnc1)C(=O)[O-]
DZ	niacin / nicotinic acid	CYP2D6	1565	c1cc(cnc1)C(=O)[O-]
DZ	niacin / nicotinic acid	CYP2D6	1565	c1cc(cnc1)C(=O)[O-]
DZ	niacin / nicotinic acid	CYP3A4	1576	c1cc(cnc1)C(=O)[O-]
DZ	niacin / nicotinic acid	DRD2	1813	c1cc(cnc1)C(=O)[O-]
DZ	niacin / nicotinic acid	DRD3	1814	c1cc(cnc1)C(=O)[O-]
DZ	niacin / nicotinic acid	DRD4	1815	c1cc(cnc1)C(=O)[O-]
DZ	niacin / nicotinic acid	S1PR1	1901	c1cc(cnc1)C(=O)[O-]
DZ	niacin / nicotinic acid	LPAR1	1902	c1cc(cnc1)C(=O)[O-]
DZ	niacin / nicotinic acid	S1PR3	1903	c1cc(cnc1)C(=O)[O-]
DZ	niacin / nicotinic acid	EEF1A2	1917	c1cc(cnc1)C(=O)[O-]
DZ	niacin / nicotinic acid	FPR1	2357	c1cc(cnc1)C(=O)[O-]
DZ	niacin / nicotinic acid	FPR2	2358	c1cc(cnc1)C(=O)[O-]
DZ	niacin / nicotinic acid	FPR3	2359	c1cc(cnc1)C(=O)[O-]
DZ	niacin / nicotinic acid	GALR1	2587	c1cc(cnc1)C(=O)[O-]
DZ	niacin / nicotinic acid	GNAI2	2771	c1cc(cnc1)C(=O)[O-]
DZ	niacin / nicotinic acid	NPBWR1	2831	c1cc(cnc1)C(=O)[O-]
DZ	niacin / nicotinic acid	NPBWR2	2832	c1cc(cnc1)C(=O)[O-]
DZ	niacin / nicotinic acid	GPR17	2840	c1cc(cnc1)C(=O)[O-]
DZ	niacin / nicotinic acid	GPR18	2841	c1cc(cnc1)C(=O)[O-]
DZ	niacin / nicotinic acid	GPER1	2852	c1cc(cnc1)C(=O)[O-]
DZ	niacin / nicotinic acid	CXCL1	2919	c1cc(cnc1)C(=O)[O-]
DZ	niacin / nicotinic acid	CXCL2	2920	c1cc(cnc1)C(=O)[O-]
DZ	niacin / nicotinic acid	CXCL3	2921	c1cc(cnc1)C(=O)[O-]
DZ	niacin / nicotinic acid	HP	3240	c1cc(cnc1)C(=O)[O-]
DZ	niacin / nicotinic acid	HP	3240	c1cc(cnc1)C(=O)[O-]
DZ	niacin / nicotinic acid	HPD	3242	c1cc(cnc1)C(=O)[O-]
DZ	niacin / nicotinic acid	HPD	3242	c1cc(cnc1)C(=O)[O-]
DZ	niacin / nicotinic acid	HTR1A	3350	c1cc(cnc1)C(=O)[O-]
DZ	niacin / nicotinic acid	HTR1B	3351	c1cc(cnc1)C(=O)[O-]
DZ	niacin / nicotinic acid	HTR1D	3352	c1cc(cnc1)C(=O)[O-]
DZ	niacin / nicotinic acid	HTR1E	3354	c1cc(cnc1)C(=O)[O-]
DZ	niacin / nicotinic acid	HTR1F	3355	c1cc(cnc1)C(=O)[O-]
DZ	niacin / nicotinic acid	HTR5A	3361	c1cc(cnc1)C(=O)[O-]
DZ	niacin / nicotinic acid	ICAM1	3383	c1cc(cnc1)C(=O)[O-]
DZ	niacin / nicotinic acid	CXCR1	3577	c1cc(cnc1)C(=O)[O-]
DZ	niacin / nicotinic acid	CXCR2	3579	c1cc(cnc1)C(=O)[O-]
DZ	niacin / nicotinic acid	CXCL10	3627	c1cc(cnc1)C(=O)[O-]
DZ	niacin / nicotinic acid	INS	3630	c1cc(cnc1)C(=O)[O-]
DZ	niacin / nicotinic acid	INS	3630	c1cc(cnc1)C(=O)[O-]
DZ	niacin / nicotinic acid	KNG1	3827	c1cc(cnc1)C(=O)[O-]
DZ	niacin / nicotinic acid	LPA	4018	c1cc(cnc1)C(=O)[O-]
DZ	niacin / nicotinic acid	LPA	4018	c1cc(cnc1)C(=O)[O-]
DZ	niacin / nicotinic acid	LPL	4023	c1cc(cnc1)C(=O)[O-]
DZ	niacin / nicotinic acid	LPL	4023	c1cc(cnc1)C(=O)[O-]
DZ	niacin / nicotinic acid	LPL	4023	c1cc(cnc1)C(=O)[O-]
DZ	niacin / nicotinic acid	CXCL9	4283	c1cc(cnc1)C(=O)[O-]
DZ	niacin / nicotinic acid	MTNR1A	4543	c1cc(cnc1)C(=O)[O-]
DZ	niacin / nicotinic acid	MTNR1B	4544	c1cc(cnc1)C(=O)[O-]
DZ	niacin / nicotinic acid	NNMT	4837	c1cc(cnc1)C(=O)[O-]
DZ	niacin / nicotinic acid	NOS3	4846	c1cc(cnc1)C(=O)[O-]
DZ	niacin / nicotinic acid	NOS3	4846	c1cc(cnc1)C(=O)[O-]
DZ	niacin / nicotinic acid	NPY	4852	c1cc(cnc1)C(=O)[O-]
DZ	niacin / nicotinic acid	PNP	4860	c1cc(cnc1)C(=O)[O-]
DZ	niacin / nicotinic acid	PNP	4860	c1cc(cnc1)C(=O)[O-]
DZ	niacin / nicotinic acid	NPY1R	4886	c1cc(cnc1)C(=O)[O-]
DZ	niacin / nicotinic acid	NPY2R	4887	c1cc(cnc1)C(=O)[O-]
DZ	niacin / nicotinic acid	NPY5R	4889	c1cc(cnc1)C(=O)[O-]
DZ	niacin / nicotinic acid	OPRD1	4985	c1cc(cnc1)C(=O)[O-]
DZ	niacin / nicotinic acid	OPRK1	4986	c1cc(cnc1)C(=O)[O-]
DZ	niacin / nicotinic acid	OPRL1	4987	c1cc(cnc1)C(=O)[O-]
DZ	niacin / nicotinic acid	OPRM1	4988	c1cc(cnc1)C(=O)[O-]
DZ	niacin / nicotinic acid	OR1D2	4991	c1cc(cnc1)C(=O)[O-]
DZ	niacin / nicotinic acid	P2RY4	5030	c1cc(cnc1)C(=O)[O-]
DZ	niacin / nicotinic acid	PDYN	5173	c1cc(cnc1)C(=O)[O-]
DZ	niacin / nicotinic acid	PENK	5179	c1cc(cnc1)C(=O)[O-]
DZ	niacin / nicotinic acid	PNOC	5368	c1cc(cnc1)C(=O)[O-]
DZ	niacin / nicotinic acid	POMC	5443	c1cc(cnc1)C(=O)[O-]
DZ	niacin / nicotinic acid	PPARA	5465	c1cc(cnc1)C(=O)[O-]
DZ	niacin / nicotinic acid	PPARA	5465	c1cc(cnc1)C(=O)[O-]
DZ	niacin / nicotinic acid	PPARA	5465	c1cc(cnc1)C(=O)[O-]
DZ	niacin / nicotinic acid	PPARG	5468	c1cc(cnc1)C(=O)[O-]
DZ	niacin / nicotinic acid	PPBP	5473	c1cc(cnc1)C(=O)[O-]
DZ	niacin / nicotinic acid	PPY	5539	c1cc(cnc1)C(=O)[O-]
DZ	niacin / nicotinic acid	NPY4R	5540	c1cc(cnc1)C(=O)[O-]
DZ	niacin / nicotinic acid	PYY	5697	c1cc(cnc1)C(=O)[O-]
DZ	niacin / nicotinic acid	PTGDR	5729	c1cc(cnc1)C(=O)[O-]
DZ	niacin / nicotinic acid	PTGDS	5730	c1cc(cnc1)C(=O)[O-]
DZ	niacin / nicotinic acid	PTGER3	5733	c1cc(cnc1)C(=O)[O-]
DZ	niacin / nicotinic acid	PTGS2	5743	c1cc(cnc1)C(=O)[O-]
DZ	niacin / nicotinic acid	PTGS2	5743	c1cc(cnc1)C(=O)[O-]
DZ	niacin / nicotinic acid	CCL5	6352	c1cc(cnc1)C(=O)[O-]
DZ	niacin / nicotinic acid	CCL16	6360	c1cc(cnc1)C(=O)[O-]
DZ	niacin / nicotinic acid	CCL19	6363	c1cc(cnc1)C(=O)[O-]
DZ	niacin / nicotinic acid	CCL20	6364	c1cc(cnc1)C(=O)[O-]
DZ	niacin / nicotinic acid	CCL21	6366	c1cc(cnc1)C(=O)[O-]
DZ	niacin / nicotinic acid	CCL25	6370	c1cc(cnc1)C(=O)[O-]
DZ	niacin / nicotinic acid	CXCL6	6372	c1cc(cnc1)C(=O)[O-]
DZ	niacin / nicotinic acid	CXCL11	6373	c1cc(cnc1)C(=O)[O-]
DZ	niacin / nicotinic acid	CXCL5	6374	c1cc(cnc1)C(=O)[O-]
DZ	niacin / nicotinic acid	SLC5A5	6528	c1cc(cnc1)C(=O)[O-]
DZ	niacin / nicotinic acid	SLC16A1	6566	c1cc(cnc1)C(=O)[O-]
DZ	niacin / nicotinic acid	SLC22A5	6584	c1cc(cnc1)C(=O)[O-]
DZ	niacin / nicotinic acid	SST	6750	c1cc(cnc1)C(=O)[O-]
DZ	niacin / nicotinic acid	SSTR1	6751	c1cc(cnc1)C(=O)[O-]
DZ	niacin / nicotinic acid	SSTR2	6752	c1cc(cnc1)C(=O)[O-]
DZ	niacin / nicotinic acid	SSTR3	6753	c1cc(cnc1)C(=O)[O-]
DZ	niacin / nicotinic acid	SSTR4	6754	c1cc(cnc1)C(=O)[O-]
DZ	niacin / nicotinic acid	SSTR5	6755	c1cc(cnc1)C(=O)[O-]
DZ	niacin / nicotinic acid	TDO2	6999	c1cc(cnc1)C(=O)[O-]
DZ	niacin / nicotinic acid	TDO2	6999	c1cc(cnc1)C(=O)[O-]
DZ	niacin / nicotinic acid	TFDP1	7027	c1cc(cnc1)C(=O)[O-]
DZ	niacin / nicotinic acid	TKT	7086	c1cc(cnc1)C(=O)[O-]
DZ	niacin / nicotinic acid	PDHX	8050	c1cc(cnc1)C(=O)[O-]
DZ	niacin / nicotinic acid	PDHX	8050	c1cc(cnc1)C(=O)[O-]
DZ	niacin / nicotinic acid	GALR3	8484	c1cc(cnc1)C(=O)[O-]
DZ	niacin / nicotinic acid	KMO	8564	c1cc(cnc1)C(=O)[O-]
DZ	niacin / nicotinic acid	SLC4A4	8671	c1cc(cnc1)C(=O)[O-]
DZ	niacin / nicotinic acid	DGAT1	8694	c1cc(cnc1)C(=O)[O-]
DZ	niacin / nicotinic acid	S1PR4	8698	c1cc(cnc1)C(=O)[O-]
DZ	niacin / nicotinic acid	GALR2	8811	c1cc(cnc1)C(=O)[O-]
DZ	niacin / nicotinic acid	APLN	8862	c1cc(cnc1)C(=O)[O-]
DZ	niacin / nicotinic acid	KYNU	8942	c1cc(cnc1)C(=O)[O-]
DZ	niacin / nicotinic acid	LPAR2	9170	c1cc(cnc1)C(=O)[O-]
DZ	niacin / nicotinic acid	GPR55	9290	c1cc(cnc1)C(=O)[O-]
DZ	niacin / nicotinic acid	S1PR2	9294	c1cc(cnc1)C(=O)[O-]
DZ	niacin / nicotinic acid	ADIPOQ	9370	c1cc(cnc1)C(=O)[O-]
DZ	niacin / nicotinic acid	P2RY14	9934	c1cc(cnc1)C(=O)[O-]
DZ	niacin / nicotinic acid	NAMPT	10135	c1cc(cnc1)C(=O)[O-]
DZ	niacin / nicotinic acid	CXCL13	10563	c1cc(cnc1)C(=O)[O-]
DZ	niacin / nicotinic acid	CXCR6	10663	c1cc(cnc1)C(=O)[O-]
DZ	niacin / nicotinic acid	CCL27	10850	c1cc(cnc1)C(=O)[O-]
DZ	niacin / nicotinic acid	PPARGC1A	10891	c1cc(cnc1)C(=O)[O-]
DZ	niacin / nicotinic acid	PPARGC1A	10891	c1cc(cnc1)C(=O)[O-]
DZ	niacin / nicotinic acid	PTGDR2	11251	c1cc(cnc1)C(=O)[O-]
DZ	niacin / nicotinic acid	GPR44	11251	c1cc(cnc1)C(=O)[O-]
DZ	niacin / nicotinic acid	HRH3	11255	c1cc(cnc1)C(=O)[O-]
DZ	niacin / nicotinic acid	SLCO2B1	11309	c1cc(cnc1)C(=O)[O-]
DZ	niacin / nicotinic acid	QPRT	23475	c1cc(cnc1)C(=O)[O-]
DZ	niacin / nicotinic acid	QPRT	23475	c1cc(cnc1)C(=O)[O-]
DZ	niacin / nicotinic acid	HAAO	23498	c1cc(cnc1)C(=O)[O-]
DZ	niacin / nicotinic acid	LPAR3	23566	c1cc(cnc1)C(=O)[O-]
DZ	niacin / nicotinic acid	HCAR1	27198	c1cc(cnc1)C(=O)[O-]
DZ	niacin / nicotinic acid	HEBP1	50865	c1cc(cnc1)C(=O)[O-]
DZ	niacin / nicotinic acid	GAL	51083	c1cc(cnc1)C(=O)[O-]
DZ	niacin / nicotinic acid	RXFP3	51289	c1cc(cnc1)C(=O)[O-]
DZ	niacin / nicotinic acid	S1PR5	53637	c1cc(cnc1)C(=O)[O-]
DZ	niacin / nicotinic acid	P2RY13	53829	c1cc(cnc1)C(=O)[O-]
DZ	niacin / nicotinic acid	GNG2	54331	c1cc(cnc1)C(=O)[O-]
DZ	niacin / nicotinic acid	NMRK1	54981	c1cc(cnc1)C(=O)[O-]
DZ	niacin / nicotinic acid	CCL28	56477	c1cc(cnc1)C(=O)[O-]
DZ	niacin / nicotinic acid	ACKR3	57007	c1cc(cnc1)C(=O)[O-]
DZ	niacin / nicotinic acid	CXCL16	58191	c1cc(cnc1)C(=O)[O-]
DZ	niacin / nicotinic acid	HRH4	59340	c1cc(cnc1)C(=O)[O-]
[truncated: 3,884 more rows]

## Sheet: Table S2
Table S2 Disease associated genes
Disease	Associated genes
Colitis	IBD2,PTGS1,CCKBR,ATP4A,HRH2,ALOX5,TNF,MTOR,ITGA4,ATXN3,CHRNA3,ITGB7,MMP9,PTGER4,GUCY2C,ICAM1,MADCAM1,IL1B,IL6,NFKB2,CXCL10,IL13RA2,IL1A,IL13RA1,ALPL,ALPI,ALPP,ALPPL2
DM	IFIH1,IDDM7,NEUROD1,CTLA4,IDDM13,IRS1,CAPN10,CCR5,SLC2A2,IGF2BP2,WFS1,IDDM23,IDDM18,NIDDM4,CDKAL1,ZFP57,HLA-DQB1,PBCA,HMGA1,IDDM15,ENPP1,PLAGL1,TAGAP,IDDM8,SUMO4,GCK,PAX4,SLC30A8,GLIS3,IL2RA,IDDM24,IDDM17,TCF7L2,INS,KCNJ11,ABCC8,MAPK8IP1,IDDM4,MTNR1B,OAS1,NIDDM2,HNF1A,PDX1,TBC1D4,DNAJC3,IRS2,IDDM11,LIPC,IDDM3,FOXC2,HNF1B,GCGR,IDDM6,INSR,RETN,AKT2,NIDDM3,HNF4A,IDDMX,FOXP3,GAA,GPR119,SIRT1,PPARD,HS…
GC	MUTYH,GACAT3,IL1B,IL1RN,CASP10,PIK3CA,APC,IRF1,KLF6,FGFR2,GCRG224,KRAS,IQGAP1,CDH1,ERBB2,GACAT2,KDR,TOP2A,SCN5A,PARP1,RRM1,HSP90AA1,TYMS,EGFR,MET,DSTN,GRPR,CD55,PPT2,TOP1

## Sheet: Table S3
Table S3 DrugBank drugs and their targets
DrugBank ID	Gene symbol	Gene ID	Disease
DB00065	TNF	7124	Colitis
DB00244	PTGS2	5743	Colitis
DB00244	PTGS1	5742	Colitis
DB00244	ALOX5	240	Colitis
DB00244	PPARG	5468	Colitis
DB00244	CHUK	1147	Colitis
DB00244	IKBKB	3551	Colitis
DB00244	MPO	4353	Colitis
DB00795	ALOX5	240	Colitis
DB00795	PTGS2	5743	Colitis
DB00795	PTGS1	5742	Colitis
DB00795	PPARG	5468	Colitis
DB00795	CHUK	1147	Colitis
DB00795	IKBKB	3551	Colitis
DB00795	SLC7A11	23657	Colitis
DB00795	ACAT1	38	Colitis
DB00795	TBXAS1	6916	Colitis
DB00795	PLA2G1B	5319	Colitis
DB01003	KCNMA1	3778	Colitis
DB01003	S100P	6286	Colitis
DB01014	PPARG	5468	Colitis
DB01014	PTGS2	5743	Colitis
DB01014	PTGS1	5742	Colitis
DB01014	ALOX5	240	Colitis
DB01250	TPMT	7172	Colitis
DB01250	IFNG	3458	Colitis
DB06674	TNF	7124	Colitis
DB08895	JAK2	3717	Colitis
DB08895	JAK1	3716	Colitis
DB08895	JAK3	3718	Colitis
DB09033	ITGA4	3676	Colitis
DB09033	ITGB7	3695	Colitis
DB00030	INSR	3643	DM
DB00030	IGF1R	3480	DM
DB00030	RB1	5925	DM
DB00030	CTSD	1509	DM
DB00030	IDE	3416	DM
DB00030	PCSK2	5126	DM
DB00030	CPE	1363	DM
DB00030	PCSK1	5122	DM
DB00030	NOV	4856	DM
DB00030	LRP2	4036	DM
DB00030	IGFBP7	3490	DM
DB00030	SYTL4	94121	DM
DB00046	INSR	3643	DM
DB00046	IGF1R	3480	DM
DB00047	INSR	3643	DM
DB00047	IGF1R	3480	DM
DB00071	INSR	3643	DM
DB00071	IGF1R	3480	DM
DB00071	IDE	3416	DM
DB00071	HLA-DQA2	3118	DM
DB00071	HLA-DQB1	3119	DM
DB00071	RB1	5925	DM
DB00071	CTSD	1509	DM
DB00071	CPE	1363	DM
DB00071	PCSK2	5126	DM
DB00071	PCSK1	5122	DM
DB00071	NOV	4856	DM
DB00071	LRP2	4036	DM
DB00071	IGFBP7	3490	DM
DB00071	SYTL4	94121	DM
DB00222	KCNJ11	3767	DM
DB00222	KCNJ1	3758	DM
DB00222	ABCC8	6833	DM
DB00284	MGAM	8972	DM
DB00284	GAA	2548	DM
DB00284	SI	6476	DM
DB00284	AMY2A	279	DM
DB00331	PRKAB1	5564	DM
DB00412	PPARG	5468	DM
DB00412	ACSL4	2182	DM
DB00491	MGAM	8972	DM
DB00491	GAA	2548	DM
DB00491	GANAB	23193	DM
DB00491	GANC	2595	DM
DB00672	ABCC8	6833	DM
DB00731	ABCC8	6833	DM
DB00731	PPARG	5468	DM
DB00839	KCNJ1	3758	DM
DB00912	ABCC8	6833	DM
DB00912	PPARG	5468	DM
DB00914	PRKAA1	5562	DM
DB00914	KCNJ8	3764	DM
DB01016	ABCC8	6833	DM
DB01016	KCNJ1	3758	DM
DB01016	KCNJ5	3762	DM
DB01016	ABCC9	10060	DM
DB01016	ABCB11	8647	DM
DB01016	ABCA1	19	DM
DB01016	CFTR	1080	DM
DB01016	KCNJ11	3767	DM
DB01016	KCNJ11	3767	DM
DB01016	KCNJ8	3764	DM
DB01016	CPT1A	1374	DM
DB01067	ABCC8	6833	DM
DB01067	PPARG	5468	DM
DB01120	ABCC8	6833	DM
DB01120	VEGFA	7422	DM
DB01124	ABCC8	6833	DM
DB01124	KCNJ1	3758	DM
DB01132	PPARG	5468	DM
DB01251	ABCC8	6833	DM
DB01251	KCNJ8	3764	DM
DB01252	ABCC8	6833	DM
DB01252	PPARG	5468	DM
DB01261	DPP4	1803	DM
DB01276	GLP1R	2740	DM
DB01278	CALCR	799	DM
DB01278	RAMP1	10267	DM
DB01278	RAMP2	10266	DM
DB01278	RAMP3	10268	DM
DB01289	KCNJ8	3764	DM
DB01306	INSR	3643	DM
DB01307	INSR	3643	DM
DB01309	INSR	3643	DM
DB01382	KCNJ1	3758	DM
DB01382	ABCC8	6833	DM
DB04876	DPP4	1803	DM
DB04878	MGAM	8972	DM
DB06203	DPP4	1803	DM
DB06292	SLC5A2	6524	DM
DB06335	DPP4	1803	DM
DB06655	GLP1R	2740	DM
DB08882	DPP4	1803	DM
DB08907	SLC5A2	6524	DM
DB08907	SLC5A1	6523	DM
DB09038	SLC5A2	6524	DM
DB09043	GLP1R	2740	DM
DB09045	GLP1R	2740	DM
DB00997	TOP2A	7153	GC
DB01101	TYMS	7298	GC
DB03010	TUBA3D	113457	GC
DB03010	TUBA3C	7278	GC
DB03010	TUBB	203068	GC
DB03010	TUBB1	81027	GC
DB03010	TUBB4B	10383	GC
DB03010	TUBB4A	10382	GC
DB03010	TUBA4A	7277	GC
DB03010	TUBB3	10381	GC
DB03010	TUBA1C	84790	GC
DB03010	EHHADH	1962	GC
DB03010	TUBA8	51807	GC
DB05030	TUBA1B	10376	GC
DB05030	TUBA1A	7846	GC
DB05101	HGF	3082	GC
DB05297	KDR	3791	GC
DB05448	EGFR	1956	GC
DB05457	BCL2	596	GC

## Sheet: Table S4
Table S4 All representative compounds in BXXXT and their CS values
Chemical	CS
Vomifoliol	12.432
10-Gingerol	6.339
Menthyl Acetate	6.216
Columbamine	6.216
Myristicin	5.591
Panicolin	4.342
Trigonelline	3.355
Glabranin	2.897
Ethyl Palmitate	2.656
Palmatine	2.528
Lysicamine	2.177
Glabridin	2.135
Obaculactone	2.105
Betulin	2.1
Hexahydrocurcumin	1.912
N-Trans-Feruloyltyramine	1.821
Limonene	1.8
Cineole	1.608
Linalool	1.49
Pinocembrin	1.463
Jatrorrhizine	1.449
Crataegolic Acid	1.251
Zingerone	1.226
Eriodictyol	1.174
Shogaol	1.071
Gingerol	1.028
Beta-Sitosterol	1
Oleanolic Acid	0.982
Echinatin	0.943
Gancaonin L	0.943
Glabrol	0.943
Glabrone	0.943
Columbianadin	0.943
Isoliquiritigenin	0.897
D-Limonene	0.764
Wogonin	0.633
Protopine	0.615
Chrysin	0.614
Protocatechualdehyde	0.607
Citral	0.571
Oroxylin A	0.565
Anethole	0.559
Ferulic Acid	0.547
Isolicoflavonol	0.508
Kaempferol	0.493
Coumestrol	0.482
Palmitoleic Acid	0.477
Baicalein	0.439
Chrysoeriol	0.408
Panaxydol	0.402
Scopoletin	0.337
Maltol	0.331
Catechol	0.311
Sigmoidin B	0.291
Licochalcone A	0.268
8-Shogaol	0.246
Berberine	0.223
Ephedrine	0.222
Formononetin	0.204
8-Gingerol	0.202
Genkwanin	0.201
Myristic Acid	0.191
Benzaldehyde	0.188
Linoleic Acid	0.185
Betulinic Acid	0.18
Quercetin	0.168
Niacin	0.161
4',7-Dihydroxyflavone	0.145
Stigmasterol	0.126
18alpha-Glycyrrhetic Acid	0.124
Catechin	0.119
Dihydrooroxylin A	0.106

## Sheet: Table S5
Table S5 Enrichment analysis for MF ontology
ID	Description	GeneRatio	BgRatio	p.adjust	geneID	Count
GO:0004089	carbonate dehydratase activity	11/140	13/16742	2.94825e-19	759/760/768/771/761/762/763/765/766/11238/23632	11
GO:0020037	heme binding	19/140	126/16742	1.4585e-16	5743/1576/1557/1559/1588/1555/4842/4843/1544/1545/1565/3162/4353/5742/1543/847/6714/1571/4846	19
GO:0046906	tetrapyrrole binding	19/140	135/16742	3.74539e-16	5743/1576/1557/1559/1588/1555/4842/4843/1544/1545/1565/3162/4353/5742/1543/847/6714/1571/4846	19
GO:0016705	oxidoreductase activity, acting on paired donors, with incorporation or reduction of molecular oxygen	19/140	154/16742	3.56642e-15	5743/1576/1557/1559/1588/7054/1555/4842/7299/4843/1544/1545/1565/3162/5742/1543/8644/1571/4846	19
GO:0004497	monooxygenase activity	16/140	94/16742	5.13403e-15	1576/1557/1559/1588/7054/1555/4842/7299/4843/1544/1545/1565/1543/8644/1571/4846	16
GO:0005506	iron ion binding	18/140	163/16742	1.24642e-13	1576/1557/1559/1588/7054/1555/4842/4843/7389/1544/1545/1565/240/7498/1543/246/1571/4846	18
GO:0016836	hydro-lyase activity	12/140	50/16742	3.91583e-13	2194/759/760/768/771/761/762/763/765/766/11238/23632	12
GO:0008144	drug binding	15/140	110/16742	9.73764e-13	1559/7153/1565/2950/2194/5468/5465/54576/54577/5467/2100/213/1813/1814/1815	15
GO:0046982	protein heterodimerization activity	25/140	473/16742	6.73934e-12	5970/7299/7153/596/3756/581/332/4790/7157/841/2353/54575/54576/54577/54600/3091/5467/54657/54658/7422/196/1956/134/152/1813	25
GO:0016835	carbon-oxygen lyase activity	12/140	68/16742	1.44717e-11	2194/759/760/768/771/761/762/763/765/766/11238/23632	12
GO:0016709	oxidoreductase activity, acting on paired donors, with incorporation or reduction of molecular oxygen, NAD(P)H as one donor, and incorporation of one atom of oxygen	9/140	38/16742	7.60906e-10	1576/1557/1559/4842/4843/1543/8644/1571/4846	9
GO:0016712	oxidoreductase activity, acting on paired donors, with incorporation or reduction of molecular oxygen, reduced flavin or flavoprotein as one donor, and incorporation of one atom of oxygen	8/140	26/16742	9.16537e-10	1576/1588/1555/1544/1545/1565/1543/1571	8
GO:0019902	phosphatase binding	14/140	162/16742	2.56062e-09	4137/207/596/3156/5770/5468/7157/1432/5465/3932/5594/1956/3643/5595	14
GO:0016829	lyase activity	14/140	172/16742	5.304e-09	7389/2194/5423/759/760/768/771/761/762/763/765/766/11238/23632	14
GO:0019825	oxygen binding	8/140	36/16742	1.3238e-08	1576/1557/1588/7054/1545/1543/213/1571	8
GO:0033293	monocarboxylic acid binding	9/140	56/16742	2.14086e-08	5468/5319/54576/54577/54600/5467/54658/3643/213	9
GO:0031406	carboxylic acid binding	14/140	196/16742	2.45618e-08	7054/4842/4843/6401/5468/5319/54576/54577/54600/5467/54658/3643/213/4846	14
GO:0043177	organic acid binding	14/140	197/16742	2.47957e-08	7054/4842/4843/6401/5468/5319/54576/54577/54600/5467/54658/3643/213/4846	14
GO:0008395	steroid hydroxylase activity	7/140	30/16742	9.17613e-08	1576/1557/1559/1555/1565/1543/1571	7
GO:0019903	protein phosphatase binding	11/140	120/16742	1.02682e-07	4137/207/596/3156/5770/5468/7157/1432/3932/1956/3643	11
GO:0070330	aromatase activity	6/140	23/16742	5.36973e-07	1576/1588/1544/1545/1565/1543	6
GO:0048037	cofactor binding	14/140	263/16742	8.19204e-07	7054/1666/4842/4843/3156/4128/142/2194/332/7498/847/3643/213/4846	14
GO:0050662	coenzyme binding	12/140	187/16742	9.88693e-07	7054/1666/4842/4843/3156/4128/142/2194/7498/847/3643/4846	12
GO:0050661	NADP binding	7/140	44/16742	1.24035e-06	1666/4842/4843/3156/2194/847/4846	7
GO:0051721	protein phosphatase 2A binding	6/140	28/16742	1.61863e-06	4137/207/596/3156/5770/7157	6
GO:0008391	arachidonic acid monooxygenase activity	5/140	15/16742	1.61863e-06	1557/1559/1555/1565/1571	5
GO:0008392	arachidonic acid epoxygenase activity	5/140	15/16742	1.61863e-06	1557/1559/1555/1565/1571	5
GO:1901338	catecholamine binding	5/140	16/16742	2.14824e-06	7054/152/1813/1814/1815	5
GO:0004879	RNA polymerase II transcription factor activity, ligand-activated sequence-specific DNA binding	7/140	49/16742	2.14824e-06	2099/5733/5468/5465/5467/196/2100	7
GO:0098531	transcription factor activity, direct ligand regulated sequence-specific DNA binding	7/140	49/16742	2.14824e-06	2099/5733/5468/5465/5467/196/2100	7
GO:0015020	glucuronosyltransferase activity	6/140	34/16742	4.49342e-06	54575/54576/54577/54600/54657/54658	6
GO:0070405	ammonium ion binding	7/140	65/16742	1.46031e-05	43/7054/4128/590/1813/1814/1815	7
GO:0016209	antioxidant activity	7/140	67/16742	1.74445e-05	5743/1728/4353/5742/6648/847/213	7
GO:0035240	dopamine binding	4/140	11/16742	1.7767e-05	7054/1813/1814/1815	4
GO:0005504	fatty acid binding	5/140	29/16742	4.49399e-05	5468/54576/5467/3643/213	5
GO:0004707	MAP kinase activity	4/140	14/16742	4.99149e-05	1432/5594/5595/5599	4
GO:0001972	retinoic acid binding	4/140	16/16742	8.55753e-05	54576/54577/54600/54658	4
GO:0052689	carboxylic ester hydrolase activity	8/140	121/16742	8.55753e-05	43/5444/5319/759/760/57406/590/4023	8
GO:0031072	heat shock protein binding	7/140	88/16742	9.3125e-05	581/4790/4792/3091/983/196/134	7
GO:0005496	steroid binding	7/140	91/16742	0.000113378	1576/2099/19/5319/54576/54658/2100	7
GO:0005126	cytokine receptor binding	11/140	272/16742	0.000180714	836/3569/7124/3458/3565/3553/6347/841/3576/627/7422	11
GO:0008227	G-protein coupled amine receptor activity	5/140	45/16742	0.000346049	3350/3274/3363/3269/152	5
GO:0097110	scaffold protein binding	5/140	46/16742	0.000376687	4842/841/5595/6714/4846	5
GO:0005080	protein kinase C binding	5/140	52/16742	0.000670466	207/7153/54575/54577/6714	5
GO:0097153	cysteine-type endopeptidase activity involved in apoptotic process	3/140	11/16742	0.00081716	836/842/841	3
GO:0051059	NF-kappaB binding	4/140	29/16742	0.000840822	5970/4792/2932/5467	4
GO:0033613	activating transcription factor binding	5/140	57/16742	0.000977932	5970/5925/4780/5468/3725	5
GO:0003707	steroid hormone receptor activity	5/140	58/16742	0.00101159	2099/5468/5465/5467/2100	5
GO:0005501	retinoid binding	4/140	31/16742	0.00101159	54576/54577/54600/54658	4
GO:0043548	phosphatidylinositol 3-kinase binding	4/140	31/16742	0.00101159	2099/2322/3932/3643	4
GO:0019840	isoprenoid binding	4/140	33/16742	0.00127317	54576/54577/54600/54658	4
GO:0003705	transcription factor activity, RNA polymerase II distal enhancer sequence-specific binding	6/140	98/16742	0.00135281	5970/4780/3725/4790/3091/196	6
GO:0070402	NADPH binding	3/140	14/16742	0.00145214	1666/3156/2194	3
GO:0099528	G-protein coupled neurotransmitter receptor activity	3/140	14/16742	0.00145214	1813/1814/1815	3
GO:0004702	receptor signaling protein serine/threonine kinase activity	5/140	64/16742	0.00145214	1432/5594/1956/5595/5599	5
GO:0042826	histone deacetylase binding	6/140	104/16742	0.00170593	5970/7153/142/595/3091/5599	6
GO:0010181	FMN binding	3/140	15/16742	0.00170593	4842/4843/4846	3
GO:0034185	apolipoprotein binding	3/140	15/16742	0.00170593	4137/19/4023	3
GO:0002020	protease binding	6/140	105/16742	0.00173794	836/7124/596/7157/2152/3630	6
GO:0001085	RNA polymerase II transcription factor binding	6/140	106/16742	0.00179921	5925/4780/3725/7157/2932/5465	6
GO:0005057	receptor signaling protein activity	7/140	153/16742	0.00202488	3756/1432/5594/1956/3643/5595/5599	7
GO:0004601	peroxidase activity	4/140	39/16742	0.00202488	5743/4353/5742/847	4
GO:0031625	ubiquitin protein ligase binding	9/140	257/16742	0.00203778	5970/5925/596/4792/7157/841/2932/3091/1956	9
GO:0016684	oxidoreductase activity, acting on peroxide as acceptor	4/140	40/16742	0.00216551	5743/4353/5742/847	4
GO:0044389	ubiquitin-like protein ligase binding	9/140	261/16742	0.00221164	5970/5925/596/4792/7157/841/2932/3091/1956	9
GO:0001228	transcriptional activator activity, RNA polymerase II transcription regulatory region sequence-specific binding	10/140	322/16742	0.00235581	2099/5970/4780/5468/3725/4790/7157/5465/2353/3091	10
GO:0050660	flavin adenine dinucleotide binding	5/140	74/16742	0.00235581	4842/4843/4128/7498/4846	5
GO:0035173	histone kinase activity	3/140	19/16742	0.00302377	5578/983/1017	3
GO:0005125	cytokine activity	8/140	219/16742	0.00304612	3569/7124/3458/3565/3553/6347/3576/7422	8
GO:0001221	transcription cofactor binding	3/140	22/16742	0.00458337	2099/4780/5465	3
GO:0004620	phospholipase activity	5/140	88/16742	0.00492476	3162/5319/57406/4023/134	5
GO:0016628	oxidoreductase activity, acting on the CH-CH group of donors, NAD or NADP as acceptor	3/140	23/16742	0.00502346	1666/2194/8644	3
GO:0070412	R-SMAD binding	3/140	23/16742	0.00502346	142/3725/2353	3
GO:0008194	UDP-glycosyltransferase activity	6/140	136/16742	0.00547957	54575/54576/54577/54600/54657/54658	6
GO:0016702	oxidoreductase activity, acting on single donors with incorporation of molecular oxygen, incorporation of two atoms of oxygen	3/140	25/16742	0.00627287	5743/240/246	3
GO:0016701	oxidoreductase activity, acting on single donors with incorporation of molecular oxygen	3/140	26/16742	0.00695516	5743/240/246	3
GO:0035326	enhancer binding	5/140	98/16742	0.00736522	5970/4780/3725/4790/196	5
GO:0051219	phosphoprotein binding	4/140	60/16742	0.00832843	5925/5594/5595/6714	4
GO:0001205	transcriptional activator activity, RNA polymerase II distal enhancer sequence-specific binding	3/140	28/16742	0.00832843	5970/4780/4790	3
GO:0016298	lipase activity	5/140	102/16742	0.00846657	3162/5319/57406/4023/134	5
GO:0003682	chromatin binding	11/140	462/16742	0.00881275	2099/5970/7153/4353/142/5468/3725/4790/7157/2353/1956	11
GO:0042805	actinin binding	3/140	29/16742	0.00889121	5970/5468/4790	3
GO:0001046	core promoter sequence-specific DNA binding	5/140	104/16742	0.00889121	2099/5468/7157/2353/2100	5
GO:0001047	core promoter binding	6/140	154/16742	0.00912657	2099/5925/5468/7157/2353/2100	6

## Sheet: Table S6
Table S6 Enrichment analysis for BP ontology
ID	Description	GeneRatio	BgRatio	p.adjust	geneID	Count
GO:0042493	response to drug	47/140	441/16655	1.15647e-35	5743/1576/836/1557/1559/3569/5733/5970/7054/1555/3383/4842/4843/596/3458/3565/3553/1544/6347/4363/4780/581/5468/595/3725/7157/19/2932/2353/1543/768/3091/3932/5243/54658/627/983/847/1312/590/2100/6714/1017/4023/1571/1813/1814	47
GO:0097305	response to alcohol	42/140	370/16655	9.28804e-33	5743/836/2099/3569/5733/7054/3383/4842/7299/3156/3565/3553/7389/1544/6347/1728/2950/581/842/595/19/841/2932/5423/2353/5742/768/3091/4759/54658/983/761/847/196/1956/2100/3643/2152/1017/1571/1813/1815	42
GO:0032496	response to lipopolysaccharide	40/140	324/16655	1.22748e-32	5743/836/3569/5733/5970/7124/7054/207/3383/4842/4843/3458/3553/1544/6401/6347/2950/4353/842/3725/4790/4792/19/841/5578/1432/2353/3576/1543/3091/5467/54658/5328/1312/5594/5595/5599/6714/2152/4846	40
GO:0002237	response to molecule of bacterial origin	40/140	336/16655	4.02972e-32	5743/836/3569/5733/5970/7124/7054/207/3383/4842/4843/3458/3553/1544/6401/6347/2950/4353/842/3725/4790/4792/19/841/5578/1432/2353/3576/1543/3091/5467/54658/5328/1312/5594/5595/5599/6714/2152/4846	40
GO:0009636	response to toxic substance	34/140	252/16655	9.70691e-29	5743/836/3569/7124/7054/596/3553/7389/1545/6347/1728/2950/4353/4780/581/842/7157/841/5444/2353/5742/1543/6648/3091/983/847/5594/196/2100/5595/213/1017/1813/4846	34
GO:0072593	reactive oxygen species metabolic process	32/140	246/16655	1.98169e-26	5743/2099/3569/7124/207/3383/4842/4843/596/3458/3565/3553/1544/1545/1728/2950/4353/4780/7157/1432/7498/1543/6648/3091/5328/847/1956/2100/3643/8644/3630/4846	32
GO:0006979	response to oxidative stress	37/140	393/16655	6.58508e-26	5743/836/3569/5970/7124/4137/207/4842/596/3553/1545/1728/2950/3162/4353/4780/142/3725/4790/7157/2932/231/2353/5742/6648/3091/983/761/847/5599/6714/8644/2152/1017/3630/1571/4846	37
GO:0010038	response to metal ion	34/140	339/16655	1.56012e-24	5743/836/3569/7054/3383/4842/596/3565/3756/7389/1544/2950/3162/581/842/5468/595/3725/4790/841/2932/2353/1543/760/3091/983/246/847/3643/5599/8644/213/1017/1813	34
GO:0000302	response to reactive oxygen species	29/140	222/16655	6.27152e-24	836/3569/5970/7124/4842/596/3553/1545/1728/2950/3162/4353/4780/142/3725/2932/231/2353/6648/3091/983/847/5599/6714/8644/2152/1017/1571/4846	29
GO:0071216	cellular response to biotic stimulus	27/140	179/16655	6.70821e-24	3569/5733/5970/7124/207/3383/4843/3458/3553/6347/2950/4790/4792/7157/19/2932/5578/1432/3576/3091/5467/5328/5594/5595/5599/6714/4846	27
GO:0071222	cellular response to lipopolysaccharide	25/140	154/16655	7.57929e-23	3569/5733/5970/7124/207/3383/4843/3458/3553/6347/2950/4790/4792/19/5578/1432/3576/3091/5467/5328/5594/5595/5599/6714/4846	25
GO:0045471	response to ethanol	24/140	136/16655	8.28396e-23	7054/3383/4842/3156/3565/3553/7389/6347/1728/2950/595/841/5423/4759/54658/983/761/847/2100/3643/1017/1571/1813/1815	24
GO:0071219	cellular response to molecule of bacterial origin	25/140	161/16655	2.04365e-22	3569/5733/5970/7124/207/3383/4843/3458/3553/6347/2950/4790/4792/19/5578/1432/3576/3091/5467/5328/5594/5595/5599/6714/4846	25
GO:0008202	steroid metabolic process	30/140	292/16655	6.9233e-22	1576/1557/1559/1588/2099/7124/1555/6817/3156/3458/3565/3553/1544/1545/1565/4790/19/6721/231/54576/1543/5467/10599/28234/54658/847/1312/8644/213/1571	30
GO:0043627	response to estrogen	27/140	221/16655	1.51027e-21	5743/836/2099/5733/7054/4842/3553/7389/1544/1728/2950/3162/842/5468/595/841/2932/760/3091/847/5594/196/1956/2100/3643/2152/1017	27
GO:0006631	fatty acid metabolic process	32/140	363/16655	1.80565e-21	5743/1557/1559/7054/207/1555/1666/1544/1545/1565/4363/240/2194/5468/1432/5319/5465/54575/54576/54577/54600/5742/1543/5467/54657/54658/246/5595/8644/3630/4023/1571	32
GO:1903409	reactive oxygen species biosynthetic process	20/140	90/16655	5.08251e-21	5743/2099/3569/7124/207/3383/4842/4843/3458/3565/3553/1544/1545/1728/4353/1543/1956/3643/3630/4846	20
GO:0003018	vascular process in circulatory system	24/140	169/16655	1.2648e-20	5743/3350/5733/207/3383/4842/4843/3156/3162/240/3274/3363/5742/3269/6648/3091/5467/7422/2100/6714/3630/134/152/4846	24
GO:2000377	regulation of reactive oxygen species metabolic process	23/140	157/16655	4.85628e-20	5743/2099/3569/7124/207/3383/596/3458/3565/3553/1545/2950/4780/7157/1432/7498/3091/5328/1956/2100/3643/8644/3630	23
GO:0034599	cellular response to oxidative stress	26/140	228/16655	5.07483e-20	3569/5970/7124/4137/207/596/1545/1728/3162/4353/4780/142/7157/2932/231/2353/6648/3091/983/5599/6714/8644/2152/1017/3630/4846	26
GO:0050880	regulation of blood vessel size	22/140	145/16655	1.71889e-19	5743/3350/5733/207/3383/4842/4843/3156/3162/240/3274/3363/5742/3269/6648/3091/5467/2100/3630/134/152/4846	22
GO:0035150	regulation of tube size	22/140	146/16655	1.91868e-19	5743/3350/5733/207/3383/4842/4843/3156/3162/240/3274/3363/5742/3269/6648/3091/5467/2100/3630/134/152/4846	22
GO:0032355	response to estradiol	22/140	147/16655	2.14354e-19	5743/836/2099/5733/7054/3553/7389/1544/1728/2950/842/595/841/2932/3091/847/196/1956/2100/3643/2152/1017	22
GO:0071466	cellular response to xenobiotic stimulus	24/140	194/16655	2.76536e-19	1576/1557/1559/1588/5925/1555/6817/1544/1545/1565/4128/1728/2950/54575/54576/54577/54600/5742/1543/54657/54658/1312/196/1571	24
GO:0007584	response to nutrient	24/140	195/16655	3.00691e-19	5743/5970/4137/4842/7299/3156/3565/3553/6347/1728/2950/3162/240/5468/595/19/1543/5467/54658/847/590/3643/8644/213	24
GO:0031960	response to corticosteroid	23/140	175/16655	4.57402e-19	5743/836/3569/7124/7054/596/3553/6347/2950/581/842/595/2353/5742/2322/3091/54658/196/590/2100/3643/6714/8644	23
GO:0009410	response to xenobiotic stimulus	24/140	200/16655	5.13553e-19	1576/1557/1559/1588/5925/1555/6817/1544/1545/1565/4128/1728/2950/54575/54576/54577/54600/5742/1543/54657/54658/1312/196/1571	24
GO:0006809	nitric oxide biosynthetic process	17/140	67/16655	5.90946e-19	5743/2099/3569/7124/207/3383/4842/4843/3458/3565/3553/1545/1728/1956/3643/3630/4846	17
GO:0043279	response to alkaloid	21/140	144/16655	2.62597e-18	836/3569/5970/7124/7054/3383/4842/596/3553/3162/142/581/5468/4790/5465/3091/5328/590/1813/1814/1815	21
GO:0006805	xenobiotic metabolic process	23/140	190/16655	2.68714e-18	1576/1557/1559/1588/1555/6817/1544/1545/1565/4128/1728/2950/54575/54576/54577/54600/5742/1543/54657/54658/1312/196/1571	23
GO:2000379	positive regulation of reactive oxygen species metabolic process	18/140	89/16655	3.06947e-18	5743/2099/3569/7124/207/3383/3458/3553/2950/4780/7157/1432/7498/5328/1956/3643/8644/3630	18
GO:0007568	aging	26/140	287/16655	1.16083e-17	3569/5970/7054/207/3383/4842/596/3156/3553/6347/1728/4353/581/842/3725/7157/2932/5423/1432/2353/5742/1543/6648/983/847/2152	26
GO:0034614	cellular response to reactive oxygen species	20/140	134/16655	1.21983e-17	3569/5970/7124/1545/1728/4353/4780/142/2932/231/2353/6648/3091/983/5599/6714/8644/2152/1017/4846	20
GO:0070482	response to oxygen levels	27/140	323/16655	1.63103e-17	5743/836/7054/207/3383/4842/4843/596/3553/6347/3162/240/5468/4313/7157/5423/5465/1543/768/3091/5467/5328/847/7422/6714/134/1813	27
GO:0046209	nitric oxide metabolic process	17/140	83/16655	2.55394e-17	5743/2099/3569/7124/207/3383/4842/4843/3458/3565/3553/1545/1728/1956/3643/3630/4846	17
GO:0051384	response to glucocorticoid	21/140	164/16655	3.43979e-17	5743/836/3569/7124/7054/596/3553/6347/2950/581/842/595/2353/5742/2322/3091/54658/196/590/2100/3643	21
GO:2001057	reactive nitrogen species metabolic process	17/140	87/16655	5.70246e-17	5743/2099/3569/7124/207/3383/4842/4843/3458/3565/3553/1545/1728/1956/3643/3630/4846	17
GO:0048732	gland development	30/140	455/16655	8.89541e-17	1588/2099/3569/5970/7124/207/7299/596/3458/7389/581/2194/595/3725/5423/3274/7498/1543/3091/54658/5328/5594/7422/196/1956/2100/3643/5595/6714/1813	30
GO:1990267	response to transition metal nanoparticle	20/140	149/16655	8.89541e-17	5743/5970/7054/3383/596/3565/7389/2950/3162/4353/581/595/4790/2932/1543/760/983/3643/213/1813	20
GO:0010817	regulation of hormone levels	31/140	494/16655	8.89541e-17	3350/1576/1588/2099/3569/5733/7124/4842/4843/6817/3156/3458/3553/1545/5578/231/54576/54577/54600/5742/1543/3091/5467/54658/1312/8644/3630/134/152/1813/2641	31
GO:0017144	drug metabolic process	13/140	36/16655	1.03101e-16	1576/1557/1559/1555/4842/1544/1565/54576/54577/1543/54658/590/1571	13
GO:0001101	response to acid chemical	26/140	321/16655	1.46876e-16	5743/836/3569/5970/7124/7054/207/3383/3553/6347/2950/5468/4313/19/2932/5444/231/5742/3091/847/590/1956/2100/6714/8644/1571	26
GO:0044708	single-organism behavior	29/140	433/16655	2.2071e-16	5743/3350/836/3569/5733/4137/7054/4842/596/3156/3553/142/3725/5465/2353/3274/5742/3269/3091/627/1312/590/1956/2100/213/134/1813/1814/1815	29
GO:0019369	arachidonic acid metabolic process	15/140	64/16655	3.19141e-16	5743/1557/1559/1555/1544/1545/1565/4363/240/5742/1543/246/5595/8644/1571	15
GO:0009612	response to mechanical stimulus	22/140	215/16655	5.07247e-16	5743/3569/5970/207/4842/3553/6347/4353/5468/3725/4790/4792/841/2932/1432/2353/3091/5595/5599/6714/2152/1813	22
GO:0015711	organic anion transport	28/140	421/16655	1.02579e-15	5733/207/4843/3553/5468/19/5319/5465/759/760/768/771/5467/10599/28234/627/761/762/763/765/766/11238/23632/213/134/1813/1814/1815	28
GO:0006720	isoprenoid metabolic process	18/140	126/16655	1.43356e-15	1576/1557/1559/7054/3156/3553/1544/1545/1565/54576/54577/54600/1543/5467/54658/8644/4023/1571	18
GO:0051051	negative regulation of transport	29/140	466/16655	1.43356e-15	5743/2099/3569/5733/7124/4137/207/3383/4842/596/3156/3553/3162/4318/4790/4792/2932/5578/6721/5742/1312/3643/3630/134/152/1813/1814/1815/4846	29
GO:1903524	positive regulation of blood circulation	16/140	91/16655	2.93018e-15	5743/5733/207/3383/4842/4843/3162/240/3274/5742/3269/5467/2100/3630/152/4846	16
GO:0097193	intrinsic apoptotic signaling pathway	24/140	297/16655	3.0763e-15	836/7124/4137/207/596/1545/5770/3162/4780/581/842/4318/7157/841/2932/5423/5578/6648/3091/3932/5599/6714/3630/2641	24
GO:0001666	response to hypoxia	24/140	298/16655	3.25791e-15	5743/836/7054/207/3383/4842/4843/596/3553/6347/3162/4313/7157/5465/1543/768/3091/5467/5328/847/7422/6714/134/1813	24
GO:0097285	cell-type specific apoptotic process	28/140	451/16655	5.4347e-15	836/2099/3569/7124/5925/207/3383/596/3156/3458/3565/6347/1728/3162/4780/581/842/3725/7157/841/2932/5423/5578/6648/3091/627/2100/8644	28
GO:0036293	response to decreased oxygen levels	24/140	307/16655	6.19732e-15	5743/836/7054/207/3383/4842/4843/596/3553/6347/3162/4313/7157/5465/1543/768/3091/5467/5328/847/7422/6714/134/1813	24
GO:0048511	rhythmic process	25/140	343/16655	6.84093e-15	2099/3569/5733/7054/3383/7153/4843/596/581/5468/3725/7157/2932/5465/3363/7422/196/2100/5599/213/134/1813/1814/1815/4846	25
GO:0071496	cellular response to external stimulus	23/140	280/16655	9.36727e-15	5743/207/3383/4842/596/3553/2950/3162/4780/5468/3725/4790/7157/841/2932/6721/2353/3091/1312/5595/5599/8644/213	23
GO:0019216	regulation of lipid metabolic process	23/140	289/16655	1.84483e-14	5743/2099/7124/5925/207/3458/3553/5468/4790/5465/54575/54576/54577/54600/2322/54657/54658/57406/6714/8644/3630/134/1814	23
GO:0006690	icosanoid metabolic process	16/140	103/16655	1.96094e-14	5743/1557/1559/1555/1544/1545/1565/4363/240/5319/5742/1543/246/5595/8644/1571	16
GO:1901568	fatty acid derivative metabolic process	16/140	103/16655	1.96094e-14	5743/1557/1559/1555/1544/1545/1565/4363/240/5319/5742/1543/246/5595/8644/1571	16
GO:0015701	bicarbonate transport	12/140	40/16655	2.1728e-14	5733/759/760/768/771/761/762/763/765/766/11238/23632	12
GO:0006721	terpenoid metabolic process	16/140	105/16655	2.60591e-14	1576/1557/1559/3553/1544/1545/1565/54576/54577/54600/1543/5467/54658/8644/4023/1571	16
GO:1903034	regulation of response to wounding	26/140	403/16655	2.67853e-14	5743/1588/3569/5733/5970/7124/4843/3156/3565/3553/6401/6347/2950/4780/5468/4790/5578/1432/5465/5467/5328/2152/3630/4023/134/4846	26
GO:0009416	response to light stimulus	25/140	366/16655	2.73612e-14	5743/836/5970/7054/207/7299/596/3156/581/842/595/7157/5578/2353/3274/3269/3091/847/1956/5599/8644/4023/1813/1814/1815	25
GO:0051090	regulation of sequence-specific DNA binding transcription factor activity	25/140	367/16655	2.87e-14	2099/3569/5970/7124/5925/207/3383/3565/3553/1545/3162/5468/3725/4790/4792/1432/5319/2353/847/5594/7422/2100/5595/5599/3630	25
GO:1903522	regulation of blood circulation	23/140	302/16655	4.22724e-14	5743/5733/7054/207/3383/4842/4843/3156/3458/3162/240/5578/3274/5742/3269/3091/5467/2100/3630/134/152/1813/4846	23
GO:0090066	regulation of anatomical structure size	27/140	465/16655	8.75213e-14	5743/3350/5733/4137/207/3383/4842/4843/3156/3162/240/2932/3274/3363/5742/3269/6648/3091/5467/627/246/7422/2100/3630/134/152/4846	27
GO:0030335	positive regulation of cell migration	25/140	389/16655	1.06155e-13	5743/3569/5733/7124/207/3383/596/3458/3565/3553/6401/6347/3725/4318/5578/3576/3091/5328/5594/7422/1956/3643/6714/2152/3630	25
GO:0033559	unsaturated fatty acid metabolic process	16/140	118/16655	1.58353e-13	5743/1557/1559/1555/1544/1545/1565/4363/240/5319/5742/1543/246/5595/8644/1571	16
GO:2000147	positive regulation of cell motility	25/140	401/16655	2.06053e-13	5743/3569/5733/7124/207/3383/596/3458/3565/3553/6401/6347/3725/4318/5578/3576/3091/5328/5594/7422/1956/3643/6714/2152/3630	25
GO:0070997	neuron death	22/140	291/16655	2.06053e-13	836/2099/3569/5925/207/4842/596/6347/1728/3162/581/842/3725/7157/2932/5423/5465/6648/3091/627/5328/2100	22
GO:0048660	regulation of smooth muscle cell proliferation	15/140	99/16655	2.11358e-13	5743/2099/3569/7124/3156/3458/3162/5468/3725/2932/231/3091/5467/1312/2100	15
GO:0045833	negative regulation of lipid metabolic process	14/140	80/16655	2.18615e-13	2099/7124/207/3553/4790/54575/54576/54577/54600/54657/54658/8644/3630/134	14
GO:2001234	negative regulation of apoptotic signaling pathway	19/140	198/16655	2.20415e-13	5970/7124/207/3383/596/3565/3553/5770/2950/3162/4780/581/4318/6648/3091/6714/3630/2641/4846	19
GO:0007565	female pregnancy	19/140	200/16655	2.61889e-13	5743/2099/5733/4137/207/4842/596/3565/3553/6347/4313/4318/231/2353/3091/5467/5328/1312/152	19
GO:0001676	long-chain fatty acid metabolic process	15/140	101/16655	2.72356e-13	5743/1557/1559/1555/1544/1545/1565/4363/240/5742/1543/246/5595/8644/1571	15
GO:0006109	regulation of carbohydrate metabolic process	18/140	174/16655	3.05969e-13	3569/207/4790/7157/2932/5465/54575/54576/54577/54600/3269/3091/54657/54658/3643/6714/3630/2641	18
GO:1901654	response to ketone	18/140	174/16655	3.05969e-13	3569/5733/5970/7054/207/3553/6347/581/842/5468/595/231/2353/5742/768/2100/3643/6714	18
GO:0051272	positive regulation of cellular component movement	25/140	412/16655	3.42254e-13	5743/3569/5733/7124/207/3383/596/3458/3565/3553/6401/6347/3725/4318/5578/3576/3091/5328/5594/7422/1956/3643/6714/2152/3630	25
GO:0048659	smooth muscle cell proliferation	15/140	103/16655	3.49587e-13	5743/2099/3569/7124/3156/3458/3162/5468/3725/2932/231/3091/5467/1312/2100	15
GO:0042542	response to hydrogen peroxide	16/140	127/16655	4.42019e-13	836/3569/5970/596/1545/3162/4780/3725/2932/231/3091/983/847/5599/6714/2152	16
GO:0040017	positive regulation of locomotion	25/140	418/16655	4.56842e-13	5743/3569/5733/7124/207/3383/596/3458/3565/3553/6401/6347/3725/4318/5578/3576/3091/5328/5594/7422/1956/3643/6714/2152/3630	25
GO:0033002	muscle cell proliferation	17/140	152/16655	4.56842e-13	5743/2099/3569/7124/3156/3458/3162/5468/3725/2932/1432/231/3091/5467/983/1312/2100	17
GO:2001233	regulation of apoptotic signaling pathway	24/140	381/16655	5.1752e-13	5970/7124/207/3383/596/3565/3553/5770/2950/3162/4780/581/4318/7157/841/2932/6648/3091/3932/5599/6714/3630/2641/4846	24
GO:0044706	multi-multicellular organism process	20/140	247/16655	9.15616e-13	5743/2099/5733/4137/207/4842/596/3565/3553/6347/4313/4318/231/2353/1543/3091/5467/5328/1312/152	20
GO:0070371	ERK1 and ERK2 cascade	20/140	250/16655	1.13904e-12	2099/3569/7124/3383/3156/3553/5770/6347/2950/3725/5578/246/5594/7422/1956/2100/5595/6714/1813/2641	20
GO:0050727	regulation of inflammatory response	21/140	286/16655	1.32807e-12	5743/1588/3569/5733/5970/7124/4843/3565/3553/6401/6347/2950/5468/4790/5578/1432/5465/5467/3630/4023/134	21
GO:0045428	regulation of nitric oxide biosynthetic process	12/140	56/16655	1.32926e-12	5743/2099/3569/7124/207/3383/3458/3565/3553/1956/3643/3630	12
GO:0010675	regulation of cellular carbohydrate metabolic process	17/140	164/16655	1.52627e-12	3569/207/7157/2932/5465/54575/54576/54577/54600/3269/3091/54657/54658/3643/6714/3630/2641	17
GO:0019748	secondary metabolic process	12/140	57/16655	1.63377e-12	7054/7299/596/3553/1544/1545/1565/231/54576/54577/1543/8644	12
GO:0045429	positive regulation of nitric oxide biosynthetic process	11/140	44/16655	2.43414e-12	5743/2099/3569/7124/207/3383/3458/3553/1956/3643/3630	11
GO:1904407	positive regulation of nitric oxide metabolic process	11/140	44/16655	2.43414e-12	5743/2099/3569/7124/207/3383/3458/3553/1956/3643/3630	11
GO:1904951	positive regulation of establishment of protein localization	26/140	499/16655	2.85148e-12	5743/43/3569/7124/207/596/3458/3553/6347/142/7157/841/2932/6721/1432/5319/3091/5467/983/1956/5599/6714/3630/4023/1813/2641	26
GO:0050890	cognition	20/140	265/16655	3.12553e-12	5743/836/7054/3156/3553/3725/2353/3274/5742/3269/3091/627/1312/590/1956/2100/134/1813/1814/1815	20
GO:0007611	learning or memory	19/140	232/16655	3.12553e-12	5743/836/7054/3156/3553/3725/2353/3274/5742/3269/3091/627/1312/590/1956/2100/1813/1814/1815	19
GO:0070374	positive regulation of ERK1 and ERK2 cascade	17/140	172/16655	3.12701e-12	2099/3569/7124/3383/3156/3553/6347/3725/5578/246/7422/1956/2100/5595/6714/1813/2641	17
GO:0070372	regulation of ERK1 and ERK2 cascade	19/140	237/16655	4.50381e-12	2099/3569/7124/3383/3156/3553/5770/6347/2950/3725/5578/246/7422/1956/2100/5595/6714/1813/2641	19
GO:0033273	response to vitamin	14/140	101/16655	4.73722e-12	5743/5970/4842/7299/3553/6347/2950/5468/595/1543/5467/847/590/3643	14
GO:0051054	positive regulation of DNA metabolic process	17/140	177/16655	4.87653e-12	3569/207/7153/3458/3565/581/3725/2932/5319/983/5594/1956/3643/5595/6714/1017/3630	17
GO:0007623	circadian rhythm	18/140	209/16655	5.8823e-12	3569/5733/7054/7153/4843/5468/3725/7157/2932/5465/3363/196/5599/213/134/1813/1814/1815	18
GO:0042310	vasoconstriction	13/140	83/16655	6.995e-12	5743/3350/5733/207/3383/4842/240/3274/3363/5742/3269/3091/152	13
GO:0034754	cellular hormone metabolic process	14/140	105/16655	7.90592e-12	1576/1588/2099/6817/3553/1545/231/54576/54577/54600/1543/54658/1312/8644	14
GO:0006730	one-carbon metabolic process	10/140	36/16655	9.58219e-12	759/760/768/771/761/762/763/765/766/11238	10
GO:0034405	response to fluid shear stress	10/140	36/16655	9.58219e-12	5743/207/4780/19/6721/760/5328/6714/2152/4846	10
GO:1903428	positive regulation of reactive oxygen species biosynthetic process	11/140	51/16655	1.25649e-11	5743/2099/3569/7124/207/3383/3458/3553/1956/3643/3630	11
GO:0032844	regulation of homeostatic process	24/140	448/16655	1.40948e-11	5743/5733/7124/4842/596/3156/3553/142/581/6721/1432/5319/760/3091/3932/766/1312/5594/5595/6714/134/1813/1814/2641	24
GO:1903426	regulation of reactive oxygen species biosynthetic process	12/140	69/16655	1.56662e-11	5743/2099/3569/7124/207/3383/3458/3565/3553/1956/3643/3630	12
GO:1901214	regulation of neuron death	19/140	257/16655	1.73552e-11	836/2099/3569/207/4842/596/6347/1728/3162/581/842/3725/7157/2932/5465/6648/3091/627/2100	19
GO:0010876	lipid localization	21/140	335/16655	2.30506e-11	3569/7124/207/4843/3553/5468/4790/4792/19/5444/6721/5319/5465/5467/10599/28234/213/4023/1813/1814/1815	21
GO:0051052	regulation of DNA metabolic process	21/140	335/16655	2.30506e-11	3569/207/7153/3458/3565/142/581/5468/3725/7157/2932/5319/3576/983/5594/1956/3643/5595/6714/1017/3630	21
GO:0002526	acute inflammatory response	15/140	139/16655	2.31773e-11	5743/3569/5733/7124/3383/3565/3553/2950/240/5468/3091/54658/2152/3630/134	15
GO:0045912	negative regulation of carbohydrate metabolic process	11/140	55/16655	2.87274e-11	3569/7157/2932/5465/54575/54576/54577/54600/54657/54658/3630	11
GO:0050673	epithelial cell proliferation	21/140	346/16655	4.18103e-11	2099/3569/7124/5925/207/3458/6347/3162/581/595/3725/5578/7498/3091/5467/5328/5594/7422/1956/2100/2152	21
GO:0042180	cellular ketone metabolic process	18/140	241/16655	5.91792e-11	5743/207/1555/3156/1728/5468/5465/231/54575/54576/54577/54600/54657/54658/1312/8644/3630/2641	18
GO:0050900	leukocyte migration	21/140	356/16655	7.09435e-11	1588/3569/5733/7124/3383/3458/3565/3553/6401/6347/3162/4318/5578/5319/3576/4312/3269/3932/7422/6714/134	21
GO:0032768	regulation of monooxygenase activity	11/140	60/16655	7.66103e-11	2099/7124/207/3458/3553/4790/2932/3091/1956/3630/4846	11
GO:0044262	cellular carbohydrate metabolic process	19/140	286/16655	1.065e-10	3569/207/7157/2932/5465/231/54575/54576/54577/54600/3269/3091/54657/54658/3643/6714/3630/8972/2641	19
GO:0050708	regulation of protein secretion	22/140	406/16655	1.065e-10	43/3569/5733/7124/4842/4843/3156/3458/3553/5578/1432/5319/3091/5467/6714/3630/4023/152/1813/1814/1815/2641	22
GO:0051402	neuron apoptotic process	17/140	223/16655	1.75561e-10	836/2099/5925/596/6347/1728/3162/581/842/3725/7157/2932/5423/6648/3091/627/2100	17
GO:0010677	negative regulation of cellular carbohydrate metabolic process	10/140	48/16655	1.95671e-10	3569/2932/5465/54575/54576/54577/54600/54657/54658/3630	10
GO:0045907	positive regulation of vasoconstriction	9/140	34/16655	2.16998e-10	5743/5733/207/3383/240/3274/5742/3269/152	9
GO:0015833	peptide transport	20/140	338/16655	2.21212e-10	5743/3569/5733/7124/4842/4843/3156/3458/3553/4792/19/5578/760/3091/5467/3630/134/152/1813/2641	20
GO:0009266	response to temperature stimulus	17/140	228/16655	2.42285e-10	3569/207/4842/3553/6347/3162/5468/4792/841/2932/2353/5594/5595/2152/4023/134/4846	17
GO:0042737	drug catabolic process	7/140	14/16655	2.48623e-10	1576/1557/1559/1555/4842/1544/1565	7
GO:0019229	regulation of vasoconstriction	11/140	67/16655	2.5329e-10	5743/5733/207/3383/4842/240/3274/5742/3269/3091/152	11
GO:0015850	organic hydroxy compound transport	17/140	229/16655	2.53586e-10	3350/5733/4842/5468/4790/4792/19/5444/6721/5742/10599/28234/213/152/1813/1814/1815	17
GO:0031663	lipopolysaccharide-mediated signaling pathway	10/140	50/16655	2.85991e-10	7124/207/3553/6347/4792/5578/1432/5594/5595/4846	10
GO:0006066	alcohol metabolic process	21/140	387/16655	3.11027e-10	1576/43/1588/7124/3156/3458/3565/3553/1545/4790/19/5444/6721/5319/231/1543/3269/5467/847/590/8644	21
GO:0097191	extrinsic apoptotic signaling pathway	17/140	233/16655	3.26574e-10	836/5970/7124/207/3383/596/3458/3565/3553/2950/3162/581/842/841/2932/6714/4846	17
GO:1900542	regulation of purine nucleotide metabolic process	16/140	202/16655	3.92282e-10	5733/4842/4843/7157/19/5578/5465/3091/7422/3643/3630/1813/1814/1815/2641/4846	16
GO:0014823	response to activity	11/140	70/16655	3.98054e-10	7054/4842/6347/2932/3091/5467/983/5328/847/2100/3643	11
GO:0007612	learning	14/140	142/16655	4.06826e-10	5743/7054/3156/3725/2353/3274/5742/3269/3091/1312/590/1813/1814/1815	14
GO:0005996	monosaccharide metabolic process	19/140	311/16655	4.06826e-10	3569/7124/207/7157/2932/1432/5465/231/54575/54576/54577/54600/5467/54657/54658/3643/6714/3630/2641	19
GO:0035094	response to nicotine	10/140	52/16655	4.11189e-10	836/5970/7124/7054/4842/596/3162/4790/5465/1813	10
GO:0032102	negative regulation of response to external stimulus	18/140	274/16655	4.28065e-10	1588/5733/3156/3565/6347/2950/5468/4790/7157/5465/5467/5328/3630/134/1813/1814/2641/4846	18
GO:0046883	regulation of hormone secretion	18/140	274/16655	4.28065e-10	3350/3569/5733/7124/4842/4843/3156/3458/3553/5578/5742/3091/5467/3630/134/152/1813/2641	18
GO:0090087	regulation of peptide transport	18/140	277/16655	5.09311e-10	5743/5733/7124/4842/4843/3156/3458/3553/4792/5578/760/3091/5467/3630/134/152/1813/2641	18
GO:0010565	regulation of cellular ketone metabolic process	15/140	175/16655	5.37525e-10	5743/207/1728/5468/5465/54575/54576/54577/54600/54657/54658/1312/8644/3630/2641	15
GO:0009306	protein secretion	23/140	492/16655	5.61519e-10	43/3569/5733/7124/4842/4843/3156/3458/3553/19/5578/1432/5319/3091/5467/6714/3630/4023/152/1813/1814/1815/2641	23
GO:0006140	regulation of nucleotide metabolic process	16/140	208/16655	5.67171e-10	5733/4842/4843/7157/19/5578/5465/3091/7422/3643/3630/1813/1814/1815/2641/4846	16
GO:0048608	reproductive structure development	22/140	447/16655	5.82039e-10	5743/1588/2099/207/3383/596/581/5468/595/841/1432/3091/5467/5594/7422/196/1956/2100/3643/6714/8644/4846	22
GO:1902532	negative regulation of intracellular signal transduction	22/140	447/16655	5.82039e-10	2099/5970/207/596/3156/3553/5770/2950/4780/4318/4792/841/2932/5578/7498/6648/3091/6714/3630/1813/1814/2641	22
GO:0042886	amide transport	20/140	361/16655	6.2082e-10	5743/3569/5733/7124/4842/4843/3156/3458/3553/4792/19/5578/760/3091/5467/3630/134/152/1813/2641	20
GO:0061458	reproductive system development	22/140	451/16655	6.82211e-10	5743/1588/2099/207/3383/596/581/5468/595/841/1432/3091/5467/5594/7422/196/1956/2100/3643/6714/8644/4846	22
GO:0034349	glial cell apoptotic process	7/140	16/16655	6.97194e-10	836/5925/6347/581/842/7157/5578	7
GO:0032868	response to insulin	22/140	452/16655	7.02266e-10	3569/5970/207/3553/5770/6347/2950/142/5468/2932/5578/5319/5465/3091/847/5594/1956/3643/5595/6714/1017/3630	22
GO:0018105	peptidyl-serine phosphorylation	17/140	247/16655	7.18417e-10	3569/7124/207/596/3458/581/2932/5578/1432/983/5594/7422/5595/5599/6714/1017/2641	17
GO:0050795	regulation of behavior	17/140	247/16655	7.18417e-10	3350/1588/3569/5733/3565/3553/6347/5578/3576/7422/2100/2152/213/3630/134/1813/1814	17
GO:0050678	regulation of epithelial cell proliferation	18/140	285/16655	7.50151e-10	2099/3569/5925/207/3458/6347/581/595/3725/5578/7498/3091/5467/5328/7422/1956/2100/2152	18
GO:0043491	protein kinase B signaling	14/140	150/16655	7.57268e-10	3569/7124/207/3553/6347/7498/1956/3643/6714/8644/2152/3630/1813/1814	14
GO:0050804	modulation of synaptic transmission	18/140	287/16655	8.30858e-10	5743/43/4842/3458/6347/2932/3274/3269/760/627/766/5594/57406/590/134/1813/1814/1815	18
GO:0010883	regulation of lipid storage	9/140	40/16655	8.60009e-10	3569/7124/5468/4790/4792/19/6721/5465/4023	9
GO:0002521	leukocyte differentiation	22/140	463/16655	1.06641e-09	3569/7124/5925/596/3458/3565/3553/142/581/5468/3725/4318/7157/841/5578/1432/2353/760/2322/3932/7422/6714	22
GO:0042445	hormone metabolic process	15/140	186/16655	1.15238e-09	1576/1588/2099/6817/3553/1545/231/54576/54577/54600/1543/3091/54658/1312/8644	15
GO:0043271	negative regulation of ion transport	13/140	127/16655	1.18967e-09	5743/5733/207/3383/4842/596/3553/4318/134/1813/1814/1815/4846	13
GO:0009812	flavonoid metabolic process	8/140	28/16655	1.29934e-09	6817/54575/54576/54577/54600/1543/54657/54658	8
GO:0009743	response to carbohydrate	16/140	222/16655	1.34725e-09	5743/836/7054/3383/3156/3553/2950/4790/5578/1432/3091/5467/5328/847/4023/2641	16
GO:0002573	myeloid leukocyte differentiation	15/140	190/16655	1.52066e-09	7124/5925/3458/3565/142/5468/3725/4318/841/5578/1432/2353/760/7422/6714	15
GO:0051091	positive regulation of sequence-specific DNA binding transcription factor activity	16/140	224/16655	1.52141e-09	2099/3569/5970/7124/207/3383/3565/3553/5468/4790/4792/5319/847/7422/2100/3630	16
GO:0018209	peptidyl-serine modification	17/140	261/16655	1.58339e-09	3569/7124/207/596/3458/581/2932/5578/1432/983/5594/7422/5595/5599/6714/1017/2641	17
GO:0030099	myeloid cell differentiation	19/140	341/16655	1.64291e-09	836/7124/5925/3458/3565/142/842/5468/3725/4318/4792/841/5578/1432/2353/760/3091/7422/6714	19
GO:0009411	response to UV	13/140	131/16655	1.68332e-09	5743/836/5970/207/7299/596/581/842/595/7157/847/1956/5599	13
GO:0006869	lipid transport	18/140	301/16655	1.68332e-09	207/4843/3553/5468/4790/4792/19/5444/6721/5319/5465/5467/10599/28234/213/1813/1814/1815	18
GO:0019373	epoxygenase P450 pathway	7/140	18/16655	1.68332e-09	1557/1559/1555/1544/1545/1543/1571	7
GO:0045922	negative regulation of fatty acid metabolic process	8/140	29/16655	1.68332e-09	207/54575/54576/54577/54600/54657/54658/3630	8
GO:0042752	regulation of circadian rhythm	12/140	105/16655	1.71789e-09	3569/5733/7153/5468/7157/5465/5599/213/134/1813/1814/1815	12
GO:0019915	lipid storage	10/140	61/16655	1.75719e-09	3569/7124/3553/5468/4790/4792/19/6721/5465/4023	10
GO:0071241	cellular response to inorganic substance	14/140	161/16655	1.75719e-09	7054/3565/3756/1544/3162/5468/3725/2932/2353/3091/246/5599/8644/1017	14
GO:1903829	positive regulation of cellular protein localization	19/140	347/16655	2.10784e-09	5743/3569/7124/207/596/3458/3553/6347/142/7157/841/2932/6721/1432/983/7422/1956/5599/3630	19
GO:1903708	positive regulation of hemopoiesis	14/140	165/16655	2.41418e-09	3569/7124/5925/3458/3565/3553/3725/841/5578/1432/2353/760/3091/3932	14
GO:0043523	regulation of neuron apoptotic process	15/140	199/16655	2.69074e-09	836/2099/596/6347/1728/3162/581/842/3725/7157/2932/6648/3091/627/2100	15
GO:0051048	negative regulation of secretion	15/140	199/16655	2.69074e-09	3569/5733/7124/4842/3156/3553/3162/5742/1312/3630/134/152/1813/1814/1815	15
GO:0006606	protein import into nucleus	17/140	272/16655	2.75919e-09	5743/3569/7124/207/3458/3553/142/3725/4792/7157/2932/1432/983/5594/1956/5595/8644	17
GO:0044744	protein targeting to nucleus	17/140	272/16655	2.75919e-09	5743/3569/7124/207/3458/3553/142/3725/4792/7157/2932/1432/983/5594/1956/5595/8644	17
GO:1902593	single-organism nuclear import	17/140	272/16655	2.75919e-09	5743/3569/7124/207/3458/3553/142/3725/4792/7157/2932/1432/983/5594/1956/5595/8644	17
GO:0009820	alkaloid metabolic process	6/140	11/16655	2.94126e-09	5743/1576/7054/1544/1565/590	6
GO:0042738	exogenous drug catabolic process	6/140	11/16655	2.94126e-09	1576/1557/1559/1555/4842/1544	6
GO:0051222	positive regulation of protein transport	21/140	445/16655	3.0033e-09	5743/43/3569/7124/3458/3553/6347/142/2932/6721/1432/5319/3091/5467/983/1956/6714/3630/4023/1813/2641	21
GO:0051170	nuclear import	17/140	276/16655	3.38565e-09	5743/3569/7124/207/3458/3553/142/3725/4792/7157/2932/1432/983/5594/1956/5595/8644	17
GO:0002790	peptide secretion	17/140	277/16655	3.5615e-09	3569/5733/7124/4842/4843/3156/3458/3553/19/5578/3091/5467/3630/134/152/1813/2641	17
GO:0043281	regulation of cysteine-type endopeptidase activity involved in apoptotic process	15/140	204/16655	3.62746e-09	836/3569/7124/207/581/842/5468/332/4318/841/7498/3932/7422/6714/2152	15
GO:0042440	pigment metabolic process	10/140	66/16655	3.63972e-09	7299/596/7389/3162/54575/54576/54577/54600/54657/54658	10
GO:0032388	positive regulation of intracellular transport	19/140	361/16655	3.81205e-09	5743/3569/7124/207/596/3565/3553/6347/142/581/7157/841/2932/6721/1432/5319/983/1956/5599	19
GO:0042312	regulation of vasodilation	9/140	48/16655	4.10718e-09	4842/4843/3156/3162/5467/2100/3630/134/4846	9
GO:0019217	regulation of fatty acid metabolic process	11/140	89/16655	4.13556e-09	5743/207/5468/5465/54575/54576/54577/54600/54657/54658/3630	11
GO:0046879	hormone secretion	18/140	322/16655	4.43152e-09	3350/3569/5733/7124/4842/4843/3156/3458/3553/5578/5742/3091/5467/3630/134/152/1813/2641	18
GO:1903531	negative regulation of secretion by cell	14/140	175/16655	4.81079e-09	3569/5733/7124/4842/3156/3553/3162/5742/3630/134/152/1813/1814/1815	14
GO:0043406	positive regulation of MAP kinase activity	15/140	209/16655	4.90764e-09	7124/3553/5770/1432/5319/2322/983/5594/7422/1956/3643/5595/6714/152/1815	15
GO:0051348	negative regulation of transferase activity	19/140	368/16655	5.10698e-09	836/3569/5925/207/3156/3553/5770/2950/5468/7157/2932/5578/54575/54576/54577/54600/54657/54658/6714	19
GO:0051341	regulation of oxidoreductase activity	11/140	91/16655	5.11559e-09	2099/7124/207/3458/3553/4790/2932/3091/1956/3630/4846	11
GO:2001237	negative regulation of extrinsic apoptotic signaling pathway	11/140	91/16655	5.11559e-09	5970/7124/207/3383/596/3565/3553/2950/3162/6714/4846	11
GO:0045073	regulation of chemokine biosynthetic process	6/140	12/16655	5.38075e-09	3569/7124/3458/3565/3553/3162	6
GO:0032846	positive regulation of homeostatic process	15/140	211/16655	5.46252e-09	5743/5733/7124/3553/581/1432/5319/760/3091/766/5594/5595/1813/1814/2641	15
GO:0002673	regulation of acute inflammatory response	10/140	70/16655	6.23578e-09	5743/3569/5733/7124/3565/3553/2950/5468/3630/134	10
GO:0070555	response to interleukin-1	12/140	119/16655	6.4227e-09	3569/5733/5970/3383/6401/6347/4790/5578/3576/3091/5595/6714	12
GO:0009914	hormone transport	18/140	331/16655	6.56659e-09	3350/3569/5733/7124/4842/4843/3156/3458/3553/5578/5742/3091/5467/3630/134/152/1813/2641	18
GO:0071902	positive regulation of protein serine/threonine kinase activity	17/140	291/16655	6.97745e-09	7124/207/3553/5770/595/1432/5319/2322/983/5594/7422/1956/3643/5595/6714/152/1815	17
GO:2001242	regulation of intrinsic apoptotic signaling pathway	13/140	149/16655	6.97745e-09	207/596/5770/4780/581/4318/7157/6648/3091/3932/6714/3630/2641	13
GO:0050730	regulation of peptidyl-tyrosine phosphorylation	15/140	216/16655	7.35097e-09	3569/3383/3458/3565/5770/7157/5578/2322/3932/7422/1956/6714/3630/134/152	15
GO:2000116	regulation of cysteine-type endopeptidase activity	15/140	217/16655	7.79079e-09	836/3569/7124/207/581/842/5468/332/4318/841/7498/3932/7422/6714/2152	15
GO:0060359	response to ammonium ion	11/140	95/16655	7.79079e-09	5970/4842/3553/142/581/2932/3269/5328/1813/1814/1815	11
GO:0006584	catecholamine metabolic process	9/140	52/16655	7.89811e-09	3350/7054/6817/4128/231/1312/1813/1814/1815	9
GO:0009712	catechol-containing compound metabolic process	9/140	52/16655	7.89811e-09	3350/7054/6817/4128/231/1312/1813/1814/1815	9
GO:0042311	vasodilation	10/140	72/16655	7.89811e-09	4842/4843/3156/3162/6648/5467/2100/3630/134/4846	10
GO:0002685	regulation of leukocyte migration	13/140	151/16655	7.91772e-09	1588/3569/5733/7124/3383/3565/3553/6401/6347/3162/3576/7422/134	13
GO:0071453	cellular response to oxygen levels	13/140	151/16655	7.91772e-09	5743/207/3383/596/3162/5468/7157/768/3091/5467/5328/7422/6714	13
GO:0015718	monocarboxylic acid transport	13/140	152/16655	8.55479e-09	207/4843/3553/5468/5319/5465/5467/10599/28234/213/1813/1814/1815	13
GO:0042033	chemokine biosynthetic process	6/140	13/16655	9.15313e-09	3569/7124/3458/3565/3553/3162	6
GO:0018958	phenol-containing compound metabolic process	11/140	98/16655	1.05197e-08	3350/7054/7299/6817/596/4128/231/1312/1813/1814/1815	11
GO:0006275	regulation of DNA replication	13/140	155/16655	1.07528e-08	3569/5468/3725/7157/5319/983/5594/1956/3643/5595/6714/1017/3630	13
GO:2001236	regulation of extrinsic apoptotic signaling pathway	13/140	156/16655	1.15913e-08	5970/7124/207/3383/596/3565/3553/2950/3162/581/841/6714/4846	13
GO:0034504	protein localization to nucleus	18/140	347/16655	1.29582e-08	5743/3569/7124/207/3458/3553/142/3725/4792/7157/2932/1432/983/5594/1956/5595/8644/3630	18
GO:0031349	positive regulation of defense response	20/140	439/16655	1.32425e-08	5743/3569/5733/5970/7124/3553/6347/3725/4313/4790/4792/841/5578/1432/2353/5594/5595/5599/6714/4023	20
GO:0071383	cellular response to steroid hormone stimulus	16/140	265/16655	1.35268e-08	2099/3569/5925/6347/2950/842/5468/5465/2322/5467/54658/196/1956/2100/6714/8644	16
GO:0023061	signal release	20/140	442/16655	1.47643e-08	3350/3569/5733/7124/4842/4843/3156/3458/3553/4128/5578/5742/3091/5467/3630/134/152/1813/1815/2641	20
GO:0050755	chemokine metabolic process	6/140	14/16655	1.53129e-08	3569/7124/3458/3565/3553/3162	6
GO:0050731	positive regulation of peptidyl-tyrosine phosphorylation	13/140	160/16655	1.53502e-08	3569/3383/3458/3565/5770/7157/2322/3932/7422/6714/3630/134/152	13
GO:1903035	negative regulation of response to wounding	13/140	160/16655	1.53502e-08	1588/5733/3156/3565/2950/5468/4790/5465/5467/5328/3630/134/4846	13
GO:0002791	regulation of peptide secretion	15/140	230/16655	1.59843e-08	5733/7124/4842/4843/3156/3458/3553/5578/3091/5467/3630/134/152/1813/2641	15
GO:0034284	response to monosaccharide	14/140	196/16655	1.81349e-08	5743/836/7054/3383/3156/3553/2950/1432/3091/5467/5328/847/4023/2641	14
GO:0050796	regulation of insulin secretion	14/140	196/16655	1.81349e-08	5733/7124/4842/4843/3156/3458/3553/5578/3091/5467/3630/152/1813/2641	14
GO:0031279	regulation of cyclase activity	10/140	79/16655	1.84528e-08	4842/4843/5578/1432/5595/5599/1813/1814/1815/4846	10
GO:0070301	cellular response to hydrogen peroxide	10/140	79/16655	1.84528e-08	3569/5970/1545/4780/2932/231/3091/983/5599/2152	10
GO:0071260	cellular response to mechanical stimulus	10/140	80/16655	2.07514e-08	5743/207/4842/3553/4790/841/2932/3091/5595/5599	10
GO:0098869	cellular oxidant detoxification	10/140	80/16655	2.07514e-08	5743/7124/1728/4353/4780/5742/6648/847/213/4846	10
GO:1902107	positive regulation of leukocyte differentiation	12/140	134/16655	2.20788e-08	3569/7124/5925/3458/3565/3553/3725/841/5578/2353/760/3932	12
GO:0015908	fatty acid transport	10/140	81/16655	2.30919e-08	207/4843/3553/5468/5319/5465/5467/1813/1814/1815	10
GO:0035666	TRIF-dependent toll-like receptor signaling pathway	10/140	81/16655	2.30919e-08	5970/3725/4790/4792/841/1432/2353/5594/5595/5599	10
GO:0045639	positive regulation of myeloid cell differentiation	10/140	81/16655	2.30919e-08	7124/5925/3458/3725/841/5578/1432/2353/760/3091	10
GO:0071450	cellular response to oxygen radical	7/140	26/16655	2.3339e-08	7124/1728/4353/4780/142/6648/4846	7
GO:0071451	cellular response to superoxide	7/140	26/16655	2.3339e-08	7124/1728/4353/4780/142/6648/4846	7
GO:0071456	cellular response to hypoxia	12/140	136/16655	2.5518e-08	5743/207/3383/596/3162/7157/768/3091/5467/5328/7422/6714	12
GO:0048661	positive regulation of smooth muscle cell proliferation	9/140	60/16655	2.61938e-08	5743/3569/7124/3156/3162/3725/2932/231/3091	9
GO:0017038	protein import	17/140	321/16655	2.62035e-08	5743/3569/7124/207/3458/3553/142/3725/4792/7157/2932/1432/983/5594/1956/5595/8644	17
GO:1903706	regulation of hemopoiesis	17/140	321/16655	2.62035e-08	3569/7124/5925/3458/3565/3553/4780/3725/4792/841/5578/1432/2353/760/2322/3091/3932	17
GO:1990748	cellular detoxification	10/140	83/16655	2.8597e-08	5743/7124/1728/4353/4780/5742/6648/847/213/4846	10
GO:1901215	negative regulation of neuron death	13/140	171/16655	3.18464e-08	2099/3569/207/596/6347/3162/581/3725/5465/6648/3091/627/2100	13
GO:0002756	MyD88-independent toll-like receptor signaling pathway	10/140	84/16655	3.18464e-08	5970/3725/4790/4792/841/1432/2353/5594/5595/5599	10
GO:0071248	cellular response to metal ion	12/140	139/16655	3.18464e-08	7054/3565/3756/1544/3162/5468/3725/2932/2353/3091/246/8644	12
GO:0050714	positive regulation of protein secretion	14/140	208/16655	3.62038e-08	43/3569/7124/3458/3553/1432/5319/3091/5467/6714/3630/4023/1813/2641	14
GO:0043405	regulation of MAP kinase activity	20/140	469/16655	3.65627e-08	7124/3156/3553/5770/2950/2932/5578/1432/5319/2322/983/5594/7422/1956/3643/5595/6714/134/152/1815	20
GO:0031098	stress-activated protein kinase signaling cascade	16/140	287/16655	3.79658e-08	7124/207/3156/3553/5770/2950/3725/4790/1432/231/2353/7498/5594/7422/5595/5599	16
GO:0098754	detoxification	10/140	86/16655	3.95668e-08	5743/7124/1728/4353/4780/5742/6648/847/213/4846	10
GO:0016042	lipid catabolic process	16/140	289/16655	4.14375e-08	1576/7124/207/1666/3553/1544/1545/5319/5465/4759/5467/57406/8644/3630/4023/134	16
GO:0051235	maintenance of location	16/140	289/16655	4.14375e-08	3569/7124/207/4842/3553/581/5468/4790/4792/19/6721/5465/3932/213/4023/1813	16
GO:0043200	response to amino acid	11/140	113/16655	4.14774e-08	836/3569/5970/7124/3383/6347/2950/4313/2932/590/1956	11
GO:0018108	peptidyl-tyrosine phosphorylation	17/140	332/16655	4.14774e-08	3569/3383/3458/3565/5770/7157/5578/2322/3932/7422/1956/3643/5595/6714/3630/134/152	17
GO:0036294	cellular response to decreased oxygen levels	12/140	143/16655	4.25048e-08	5743/207/3383/596/3162/7157/768/3091/5467/5328/7422/6714	12
GO:0045740	positive regulation of DNA replication	10/140	87/16655	4.33099e-08	3569/3725/5319/983/5594/1956/3643/5595/1017/3630	10
GO:0032642	regulation of chemokine production	9/140	64/16655	4.41805e-08	3569/7124/3458/3565/3553/2950/3162/3091/4023	9
GO:0018212	peptidyl-tyrosine modification	17/140	334/16655	4.4676e-08	3569/3383/3458/3565/5770/7157/5578/2322/3932/7422/1956/3643/5595/6714/3630/134/152	17
GO:0071214	cellular response to abiotic stimulus	16/140	292/16655	4.67194e-08	5743/207/4842/3553/581/842/4790/7157/841/2932/5578/1432/3091/2100/5595/5599	16
GO:0097164	ammonium ion metabolic process	13/140	178/16655	4.86423e-08	3350/43/7054/4128/5444/5319/231/1312/590/8644/1813/1814/1815	13
GO:0008631	intrinsic apoptotic signaling pathway in response to oxidative stress	8/140	45/16655	4.86423e-08	4137/207/596/1545/4780/6648/3091/3630	8
GO:0045776	negative regulation of blood pressure	8/140	45/16655	4.86423e-08	4842/4843/5465/6648/134/1813/1814/4846	8
GO:0000303	response to superoxide	7/140	29/16655	4.86963e-08	7124/1728/4353/4780/142/6648/4846	7
GO:0032770	positive regulation of monooxygenase activity	7/140	29/16655	4.86963e-08	2099/7124/207/3458/3553/3091/3630	7
GO:0010888	negative regulation of lipid storage	6/140	17/16655	5.16706e-08	3569/7124/5468/4792/19/5465	6
GO:0031099	regeneration	13/140	180/16655	5.47566e-08	596/6347/2950/5468/595/3725/1432/2322/5467/54658/983/5328/1017	13
GO:0046677	response to antibiotic	8/140	46/16655	5.73352e-08	836/3569/3553/6347/842/7157/841/1543	8
GO:0030168	platelet activation	15/140	257/16655	6.14144e-08	3569/5733/207/5770/5578/1432/3932/5594/7422/57406/5595/6714/213/152/4846	15
GO:0000305	response to oxygen radical	7/140	30/16655	6.18605e-08	7124/1728/4353/4780/142/6648/4846	7
GO:2001243	negative regulation of intrinsic apoptotic signaling pathway	10/140	91/16655	6.3993e-08	207/596/5770/4780/4318/6648/3091/6714/3630/2641	10
GO:0048512	circadian behavior	8/140	47/16655	6.75624e-08	3569/5733/7054/7157/213/134/1813/1814	8
GO:0043112	receptor metabolic process	12/140	150/16655	6.86541e-08	43/5733/7124/6401/5770/5468/5465/3576/3091/7422/1813/1814	12
GO:0007622	rhythmic behavior	8/140	48/16655	7.95929e-08	3569/5733/7054/7157/213/134/1813/1814	8
GO:0032722	positive regulation of chemokine production	8/140	48/16655	7.95929e-08	3569/7124/3458/3565/3553/3162/3091/4023	8
GO:0034166	toll-like receptor 10 signaling pathway	9/140	69/16655	8.18049e-08	5970/3725/4790/4792/1432/2353/5594/5595/5599	9
GO:0001819	positive regulation of cytokine production	18/140	397/16655	8.54602e-08	5743/3569/5970/7124/3458/3565/3553/1545/6347/3162/4790/4792/1432/3091/6714/3630/4023/1813	18
GO:0051403	stress-activated MAPK cascade	15/140	264/16655	8.54602e-08	7124/207/3156/3553/5770/2950/3725/4790/1432/2353/7498/5594/7422/5595/5599	15
GO:0090276	regulation of peptide hormone secretion	14/140	225/16655	8.82354e-08	5733/7124/4842/4843/3156/3458/3553/5578/3091/5467/3630/152/1813/2641	14
GO:0034146	toll-like receptor 5 signaling pathway	9/140	70/16655	9.18295e-08	5970/3725/4790/4792/1432/2353/5594/5595/5599	9
GO:0050999	regulation of nitric-oxide synthase activity	8/140	49/16655	9.2023e-08	2099/207/3553/2932/3091/1956/3630/4846	8
GO:0051926	negative regulation of calcium ion transport	8/140	49/16655	9.2023e-08	5743/5733/3383/4842/596/1813/1815/4846	8
GO:0034138	toll-like receptor 3 signaling pathway	10/140	95/16655	9.34914e-08	5970/3725/4790/4792/841/1432/2353/5594/5595/5599	10
GO:0042745	circadian sleep/wake cycle	7/140	32/16655	9.53521e-08	3569/5733/7054/213/134/1813/1814	7
GO:0045909	positive regulation of vasodilation	7/140	32/16655	9.53521e-08	4842/4843/3162/5467/2100/3630/4846	7
GO:0050806	positive regulation of synaptic transmission	11/140	124/16655	9.89275e-08	5743/4842/3458/6347/2932/760/766/5594/134/1813/1815	11
GO:0032869	cellular response to insulin stimulus	18/140	402/16655	1.002e-07	5970/207/3553/5770/6347/2950/142/5468/5578/5319/3091/5594/1956/3643/5595/6714/1017/3630	18
GO:0030073	insulin secretion	14/140	228/16655	1.0116e-07	5733/7124/4842/4843/3156/3458/3553/5578/3091/5467/3630/152/1813/2641	14
GO:0042359	vitamin D metabolic process	6/140	19/16655	1.02512e-07	1576/7124/3458/3553/4790/1543	6
GO:0045088	regulation of innate immune response	18/140	403/16655	1.0303e-07	5970/3458/3553/5770/5468/3725/4313/4790/4792/841/1432/2353/5594/5595/5599/6714/3630/1813	18
GO:0030072	peptide hormone secretion	15/140	269/16655	1.04923e-07	3569/5733/7124/4842/4843/3156/3458/3553/5578/3091/5467/3630/152/1813/2641	15
GO:0000060	protein import into nucleus, translocation	8/140	50/16655	1.04923e-07	3569/7124/207/3458/4792/7157/983/8644	8
GO:0051896	regulation of protein kinase B signaling	11/140	125/16655	1.05038e-07	3569/7124/7498/1956/3643/6714/8644/2152/3630/1813/1814	11
GO:0097529	myeloid leukocyte migration	12/140	157/16655	1.0673e-07	1588/3569/5733/3458/3565/3553/6347/5578/5319/3576/3269/7422	12
GO:0032602	chemokine production	9/140	72/16655	1.12252e-07	3569/7124/3458/3565/3553/2950/3162/3091/4023	9
GO:0042417	dopamine metabolic process	7/140	33/16655	1.15154e-07	3350/7054/4128/1312/1813/1814/1815	7
GO:1901030	positive regulation of mitochondrial outer membrane permeabilization involved in apoptotic signaling pathway	7/140	33/16655	1.15154e-07	207/596/581/7157/841/2932/5599	7
GO:0045834	positive regulation of lipid metabolic process	11/140	128/16655	1.32584e-07	5743/7124/207/3458/3553/5468/5465/2322/57406/6714/3630	11
GO:0035994	response to muscle stretch	6/140	20/16655	1.39787e-07	5970/3725/4790/4792/1432/2353	6
GO:0071498	cellular response to fluid shear stress	6/140	20/16655	1.39787e-07	5743/4780/6721/760/5328/6714	6
GO:0002763	positive regulation of myeloid leukocyte differentiation	8/140	52/16655	1.39787e-07	7124/5925/3458/3725/841/5578/2353/760	8
GO:0045913	positive regulation of carbohydrate metabolic process	9/140	74/16655	1.39787e-07	207/4790/5465/3269/3091/3643/6714/3630/2641	9
GO:0046888	negative regulation of hormone secretion	9/140	74/16655	1.39787e-07	3569/5733/4842/3156/3553/5742/134/152/1813	9
GO:0051047	positive regulation of secretion	17/140	367/16655	1.54342e-07	43/3569/7124/3458/3565/3553/1432/5319/3091/5467/6714/3630/4023/134/1813/1814/2641	17
GO:0031334	positive regulation of protein complex assembly	13/140	200/16655	1.70271e-07	7124/4137/3383/581/3725/7157/2932/4312/246/7422/196/5599/6714	13
GO:0010039	response to iron ion	7/140	35/16655	1.72722e-07	596/7389/3162/595/2932/1543/1813	7
GO:0048662	negative regulation of smooth muscle cell proliferation	7/140	35/16655	1.72722e-07	2099/3458/3162/5468/5467/1312/2100	7
GO:0006775	fat-soluble vitamin metabolic process	9/140	76/16655	1.73501e-07	1576/7124/3458/3553/4790/1543/5467/8644/4023	9
GO:0038123	toll-like receptor TLR1:TLR2 signaling pathway	9/140	76/16655	1.73501e-07	5970/3725/4790/4792/1432/2353/5594/5595/5599	9
GO:0038124	toll-like receptor TLR6:TLR2 signaling pathway	9/140	76/16655	1.73501e-07	5970/3725/4790/4792/1432/2353/5594/5595/5599	9
GO:0051098	regulation of binding	15/140	282/16655	1.84585e-07	596/1565/3162/142/581/3725/4318/4792/2932/5444/5465/5595/5599/6714/2641	15
GO:0006953	acute-phase response	8/140	54/16655	1.84585e-07	5743/3569/5733/7124/3553/3091/54658/3630	8
GO:0052696	flavonoid glucuronidation	6/140	21/16655	1.86192e-07	54575/54576/54577/54600/54657/54658	6
GO:0042368	vitamin D biosynthetic process	5/140	11/16655	2.07562e-07	1576/7124/3458/3553/4790	5
GO:0031668	cellular response to extracellular stimulus	13/140	204/16655	2.08708e-07	3383/596/2950/3162/4780/5468/3725/7157/6721/2353/1312/8644/213	13
GO:0006801	superoxide metabolic process	8/140	55/16655	2.1168e-07	7124/4843/1728/2950/4353/4780/6648/4846	8
GO:0001525	angiogenesis	18/140	425/16655	2.12583e-07	5743/3569/3553/1545/6347/3162/581/3725/4313/841/5578/1432/3576/3091/5328/7422/2152/4846	18
GO:0015837	amine transport	9/140	78/16655	2.12583e-07	5733/7054/3553/5742/134/152/1813/1814/1815	9
GO:0034162	toll-like receptor 9 signaling pathway	9/140	78/16655	2.12583e-07	5970/3725/4790/4792/1432/2353/5594/5595/5599	9
GO:0006913	nucleocytoplasmic transport	18/140	428/16655	2.35739e-07	5743/3569/7124/207/3458/3553/142/3725/4792/7157/2932/1432/3692/983/5594/1956/5595/8644	18
GO:0038034	signal transduction in absence of ligand	9/140	79/16655	2.35927e-07	836/7124/207/596/3565/3553/581/842/2932	9
GO:0097192	extrinsic apoptotic signaling pathway in absence of ligand	9/140	79/16655	2.35927e-07	836/7124/207/596/3565/3553/581/842/2932	9
GO:0008210	estrogen metabolic process	6/140	22/16655	2.45343e-07	1588/6817/3553/1545/54658/1312	6
GO:0042573	retinoic acid metabolic process	6/140	22/16655	2.45343e-07	54576/54577/54600/1543/54658/8644	6
GO:0050709	negative regulation of protein secretion	10/140	107/16655	2.58673e-07	3569/5733/7124/4842/3156/3553/3630/1813/1814/1815	10
GO:0051169	nuclear transport	18/140	433/16655	2.76305e-07	5743/3569/7124/207/3458/3553/142/3725/4792/7157/2932/1432/3692/983/5594/1956/5595/8644	18
GO:0000187	activation of MAPK activity	11/140	139/16655	2.85892e-07	7124/3553/5770/1432/5319/983/5594/3643/5595/152/1815	11
GO:0070542	response to fatty acid	9/140	81/16655	2.89284e-07	5743/207/3553/5468/5444/5742/847/6714/8644	9
GO:0006260	DNA replication	16/140	338/16655	2.8981e-07	43/3569/142/5468/3725/7157/5423/5319/983/5594/1956/3643/5595/6714/1017/3630	16
GO:0045787	positive regulation of cell cycle	16/140	338/16655	2.8981e-07	5925/207/3553/332/595/7157/5578/1543/983/1956/3643/6714/1017/3630/1813/1814	16
GO:0030431	sleep	7/140	38/16655	2.93685e-07	3569/5733/2353/213/134/1813/1814	7
GO:0006766	vitamin metabolic process	12/140	174/16655	2.98009e-07	5743/1576/7124/3458/3553/4363/2194/4790/1543/5467/8644/4023	12
GO:0008217	regulation of blood pressure	12/140	174/16655	2.98009e-07	5743/4842/4843/3162/5468/5465/5742/6648/134/1813/1814/4846	12
GO:0007159	leukocyte cell-cell adhesion	19/140	488/16655	3.03797e-07	836/3569/7124/207/3383/596/3458/3565/3553/6401/6347/581/7157/841/5465/2322/3932/6714/3630	19
GO:0019430	removal of superoxide radicals	6/140	23/16655	3.15578e-07	7124/1728/4353/4780/6648/4846	6
GO:0036296	response to increased oxygen levels	6/140	23/16655	3.15578e-07	240/5468/5423/1543/5328/847	6
GO:0045187	regulation of circadian sleep/wake cycle, sleep	6/140	23/16655	3.15578e-07	3569/5733/213/134/1813/1814	6
GO:0055093	response to hyperoxia	6/140	23/16655	3.15578e-07	240/5468/5423/1543/5328/847	6
GO:0002674	negative regulation of acute inflammatory response	5/140	12/16655	3.23612e-07	3565/2950/5468/3630/134	5
GO:0030656	regulation of vitamin metabolic process	5/140	12/16655	3.23612e-07	7124/3458/3553/4790/8644	5
GO:0061614	pri-miRNA transcription from RNA polymerase II promoter	5/140	12/16655	3.23612e-07	3725/5465/2353/3091/5467	5
GO:1902893	regulation of pri-miRNA transcription from RNA polymerase II promoter	5/140	12/16655	3.23612e-07	3725/5465/2353/3091/5467	5
GO:0034134	toll-like receptor 2 signaling pathway	9/140	83/16655	3.43147e-07	5970/3725/4790/4792/1432/2353/5594/5595/5599	9
GO:0071384	cellular response to corticosteroid stimulus	8/140	59/16655	3.43364e-07	3569/6347/2950/842/2322/54658/196/8644	8
GO:0002687	positive regulation of leukocyte migration	10/140	111/16655	3.45731e-07	3569/5733/7124/3383/3565/3553/6401/6347/3576/7422	10
GO:0097530	granulocyte migration	10/140	111/16655	3.45731e-07	5733/3458/3565/3553/6347/5578/5319/3576/3269/7422	10
GO:0046942	carboxylic acid transport	15/140	300/16655	3.76059e-07	207/4843/3553/5468/5319/5465/5467/10599/28234/627/213/134/1813/1814/1815	15
GO:0046324	regulation of glucose import	8/140	60/16655	3.88747e-07	2099/7124/207/4780/5578/1432/3643/3630	8
GO:0030522	intracellular receptor signaling pathway	15/140	301/16655	3.90657e-07	2099/5733/5970/5925/596/5468/4792/841/5465/5467/246/196/2100/6714/8644	15
GO:0051953	negative regulation of amine transport	6/140	24/16655	4.03124e-07	5733/3553/5742/134/152/1813	6
GO:0015758	glucose transport	11/140	145/16655	4.12374e-07	2099/7124/207/3553/4780/5578/1432/5319/5467/3643/3630	11
GO:0015849	organic acid transport	15/140	303/16655	4.22632e-07	207/4843/3553/5468/5319/5465/5467/10599/28234/627/213/134/1813/1814/1815	15
GO:0046717	acid secretion	10/140	114/16655	4.37762e-07	5733/4843/3553/5319/3274/627/134/1813/1814/1815	10
GO:0010631	epithelial cell migration	13/140	220/16655	4.53512e-07	5743/207/3458/3565/1545/3725/4318/5578/3091/5467/7422/6714/4846	13
GO:0008645	hexose transport	11/140	147/16655	4.68352e-07	2099/7124/207/3553/4780/5578/1432/5319/5467/3643/3630	11
GO:0010212	response to ionizing radiation	11/140	147/16655	4.68352e-07	836/3383/596/3553/6347/581/595/7157/5423/1432/3091	11
GO:1901028	regulation of mitochondrial outer membrane permeabilization involved in apoptotic signaling pathway	7/140	41/16655	4.73916e-07	207/596/581/7157/841/2932/5599	7
GO:0036473	cell death in response to oxidative stress	8/140	62/16655	4.91954e-07	4137/207/596/1545/4780/6648/3091/3630	8
GO:0001523	retinoid metabolic process	9/140	87/16655	4.92643e-07	1545/54576/54577/54600/1543/5467/54658/8644/4023	9
GO:0002755	MyD88-dependent toll-like receptor signaling pathway	9/140	87/16655	4.92643e-07	5970/3725/4790/4792/1432/2353/5594/5595/5599	9
GO:0043255	regulation of carbohydrate biosynthetic process	9/140	87/16655	4.92643e-07	3569/207/4790/2932/5465/3269/3643/3630/2641	9
GO:0010885	regulation of cholesterol storage	5/140	13/16655	4.92643e-07	5468/19/6721/5465/4023	5
GO:0008637	apoptotic mitochondrial changes	10/140	116/16655	5.02614e-07	207/596/581/3725/4318/7157/841/2932/6648/5599	10
GO:0045637	regulation of myeloid cell differentiation	12/140	184/16655	5.04516e-07	7124/5925/3458/3565/3725/4792/841/5578/1432/2353/760/3091	12
GO:0042749	regulation of circadian sleep/wake cycle	6/140	25/16655	5.04516e-07	3569/5733/213/134/1813/1814	6
GO:0090132	epithelium migration	13/140	223/16655	5.14071e-07	5743/207/3458/3565/1545/3725/4318/5578/3091/5467/7422/6714/4846	13
GO:0015749	monosaccharide transport	11/140	149/16655	5.21957e-07	2099/7124/207/3553/4780/5578/1432/5319/5467/3643/3630	11
GO:1903649	regulation of cytoplasmic transport	18/140	456/16655	5.3588e-07	5743/3569/7124/4842/596/3553/142/581/4792/2932/6721/1432/5319/983/5594/1956/5595/6714	18
GO:0034142	toll-like receptor 4 signaling pathway	10/140	117/16655	5.36569e-07	5970/3725/4790/4792/841/1432/2353/5594/5595/5599	10
GO:0010676	positive regulation of cellular carbohydrate metabolic process	8/140	63/16655	5.40896e-07	207/5465/3269/3091/3643/6714/3630/2641	8
GO:0046686	response to cadmium ion	7/140	42/16655	5.42831e-07	1544/3162/983/847/5599/8644/1017	7
GO:0045862	positive regulation of proteolysis	16/140	358/16655	5.69083e-07	836/7124/5925/207/3458/3553/4780/581/842/5468/841/2932/7498/3932/983/2152	16
GO:0030799	regulation of cyclic nucleotide metabolic process	11/140	151/16655	5.88162e-07	5733/4842/4843/19/5578/7422/1813/1814/1815/2641/4846	11
GO:0051186	cofactor metabolic process	16/140	359/16655	5.88162e-07	5743/3156/7389/1544/3162/2194/7157/5465/231/1543/3091/54657/54658/3643/8644/3630	16
GO:0052695	cellular glucuronidation	6/140	26/16655	6.33509e-07	54575/54576/54577/54600/54657/54658	6
GO:0046777	protein autophosphorylation	13/140	228/16655	6.47089e-07	207/3725/2932/5578/1432/2322/3932/7422/1956/3643/5595/6714/3630	13
GO:0090130	tissue migration	13/140	228/16655	6.47089e-07	5743/207/3458/3565/1545/3725/4318/5578/3091/5467/7422/6714/4846	13
GO:0009746	response to hexose	12/140	189/16655	6.54192e-07	5743/836/7054/3383/3156/3553/1432/3091/5467/5328/4023/2641	12
GO:0045931	positive regulation of mitotic cell cycle	10/140	120/16655	6.64945e-07	5925/3553/332/595/5578/1543/983/3643/3630/1814	10
GO:1901617	organic hydroxy compound biosynthetic process	13/140	229/16655	6.75634e-07	1576/43/7124/7054/7299/3156/3458/3553/4790/231/3269/246/8644	13
GO:0006919	activation of cysteine-type endopeptidase activity involved in apoptotic process	9/140	91/16655	6.93893e-07	836/7124/581/842/5468/841/7498/3932/2152	9
GO:0048872	homeostasis of number of cells	13/140	230/16655	7.07196e-07	836/3569/5925/207/596/3458/3162/581/5423/1432/2322/3091/7422	13
GO:0045766	positive regulation of angiogenesis	10/140	121/16655	7.1199e-07	5743/3553/1545/3162/5578/3576/3091/7422/2152/4846	10
GO:0010878	cholesterol storage	5/140	14/16655	7.14477e-07	5468/19/6721/5465/4023	5
GO:0042362	fat-soluble vitamin biosynthetic process	5/140	14/16655	7.14477e-07	1576/7124/3458/3553/4790	5
GO:0051205	protein insertion into membrane	7/140	44/16655	7.29998e-07	207/596/581/7157/841/1956/5599	7
GO:1901342	regulation of vasculature development	13/140	231/16655	7.34173e-07	5743/3569/3553/1545/6347/3162/5578/3576/7498/3091/7422/2152/4846	13
GO:0032368	regulation of lipid transport	9/140	92/16655	7.47576e-07	207/3553/5468/4790/4792/19/5444/6721/5465	9
GO:0071347	cellular response to interleukin-1	9/140	92/16655	7.47576e-07	3569/5733/5970/3383/6347/4790/3576/3091/5595	9
GO:0050802	circadian sleep/wake cycle, sleep	6/140	27/16655	7.76972e-07	3569/5733/213/134/1813/1814	6
GO:1900182	positive regulation of protein localization to nucleus	10/140	123/16655	8.14785e-07	5743/3569/7124/207/3553/142/1432/983/1956/3630	10
GO:0050805	negative regulation of synaptic transmission	8/140	67/16655	8.34567e-07	5743/43/4842/627/57406/590/134/1813	8
GO:0050679	positive regulation of epithelial cell proliferation	11/140	158/16655	8.89161e-07	2099/3569/207/6347/595/3725/5578/3091/7422/1956/2152	11
GO:0016101	diterpenoid metabolic process	9/140	94/16655	8.90662e-07	1545/54576/54577/54600/1543/5467/54658/8644/4023	9
GO:0014074	response to purine-containing compound	11/140	159/16655	9.43533e-07	5743/3569/5970/7299/3553/6347/5468/3725/2353/3091/1017	11
GO:0034612	response to tumor necrosis factor	14/140	280/16655	9.61817e-07	5743/836/3569/5970/7124/3383/6401/6347/2950/4780/4790/841/3576/3643	14
GO:0001844	protein insertion into mitochondrial membrane involved in apoptotic signaling pathway	6/140	28/16655	9.61817e-07	207/596/581/7157/841/5599	6
GO:0010743	regulation of macrophage derived foam cell differentiation	6/140	28/16655	9.61817e-07	5468/4790/4792/19/5465/4023	6
GO:0042594	response to starvation	11/140	160/16655	9.95646e-07	596/4780/5468/3725/7157/6721/54658/1312/8644/213/2641	11
GO:1902105	regulation of leukocyte differentiation	13/140	238/16655	1.00554e-06	3569/7124/5925/3458/3565/3553/3725/841/5578/2353/760/2322/3932	13
GO:0030730	sequestering of triglyceride	5/140	15/16655	1.01832e-06	7124/3553/5468/5465/4023	5
GO:0048148	behavioral response to cocaine	5/140	15/16655	1.01832e-06	4842/142/1813/1814/1815	5
GO:0035690	cellular response to drug	8/140	69/16655	1.02537e-06	7054/4843/3553/6347/4780/7157/3091/2100	8
GO:0045981	positive regulation of nucleotide metabolic process	10/140	127/16655	1.06479e-06	5733/4842/4843/19/5578/3091/3643/3630/2641/4846	10
GO:1900544	positive regulation of purine nucleotide metabolic process	10/140	127/16655	1.06479e-06	5733/4842/4843/19/5578/3091/3643/3630/2641/4846	10
GO:1903036	positive regulation of response to wounding	11/140	162/16655	1.10834e-06	5743/3569/5733/7124/3553/6347/4780/5578/5467/2152/4023	11
GO:0051353	positive regulation of oxidoreductase activity	7/140	47/16655	1.10834e-06	2099/7124/207/3458/3553/3091/3630	7
GO:0009150	purine ribonucleotide metabolic process	18/140	482/16655	1.10834e-06	5733/4842/4843/6817/3156/7157/19/5578/5465/3091/7422/3643/3630/1813/1814/1815/2641/4846	18
GO:2000021	regulation of ion homeostasis	12/140	200/16655	1.122e-06	4842/596/581/5319/760/3932/766/1312/6714/134/1813/1814	12
GO:0030802	regulation of cyclic nucleotide biosynthetic process	10/140	128/16655	1.1325e-06	5733/4842/4843/19/5578/1813/1814/1815/2641/4846	10
GO:0010959	regulation of metal ion transport	15/140	331/16655	1.14597e-06	5743/5733/207/3383/4842/596/6347/581/5319/134/1813/1814/1815/2641/4846	15
GO:0022410	circadian sleep/wake cycle process	6/140	29/16655	1.15955e-06	3569/5733/213/134/1813/1814	6
GO:0051204	protein insertion into mitochondrial membrane	6/140	29/16655	1.15955e-06	207/596/581/7157/841/5599	6
GO:0097202	activation of cysteine-type endopeptidase activity	9/140	98/16655	1.21742e-06	836/7124/581/842/5468/841/7498/3932/2152	9
GO:1901216	positive regulation of neuron death	8/140	71/16655	1.24828e-06	836/4842/1728/581/842/3725/7157/2932	8
GO:1903532	positive regulation of secretion by cell	15/140	335/16655	1.32241e-06	43/3569/7124/3458/3565/3553/1432/5319/3091/5467/6714/3630/4023/1813/2641	15
GO:0051224	negative regulation of protein transport	12/140	204/16655	1.36489e-06	3569/5733/7124/4842/3156/3553/4792/2932/3630/1813/1814/1815	12
GO:0015844	monoamine transport	8/140	72/16655	1.3808e-06	3350/5733/4842/5742/152/1813/1814/1815	8
GO:0051952	regulation of amine transport	8/140	72/16655	1.3808e-06	5733/3553/5742/134/152/1813/1814/1815	8
GO:0097345	mitochondrial outer membrane permeabilization	7/140	49/16655	1.44908e-06	207/596/581/7157/841/2932/5599	7
GO:0022612	gland morphogenesis	10/140	132/16655	1.47366e-06	2099/3569/7124/596/3458/581/5423/5328/1956/6714	10
GO:0046323	glucose import	8/140	73/16655	1.52863e-06	2099/7124/207/4780/5578/1432/3643/3630	8
GO:0044070	regulation of anion transport	10/140	133/16655	1.5707e-06	3350/207/4842/3553/760/766/134/1813/1814/1815	10
GO:1904018	positive regulation of vasculature development	10/140	133/16655	1.5707e-06	5743/3553/1545/3162/5578/3576/3091/7422/2152/4846	10
GO:1902110	positive regulation of mitochondrial membrane permeability involved in apoptotic process	7/140	50/16655	1.64558e-06	207/596/581/7157/841/2932/5599	7
GO:1902686	mitochondrial outer membrane permeabilization involved in programmed cell death	7/140	50/16655	1.64558e-06	207/596/581/7157/841/2932/5599	7
GO:0009259	ribonucleotide metabolic process	18/140	497/16655	1.64558e-06	5733/4842/4843/6817/3156/7157/19/5578/5465/3091/7422/3643/3630/1813/1814/1815/2641/4846	18
GO:0007613	memory	9/140	102/16655	1.64558e-06	5743/7054/3553/3274/5742/3269/1312/1813/1815	9
GO:0010634	positive regulation of epithelial cell migration	9/140	102/16655	1.64558e-06	5743/207/3458/3725/4318/5578/3091/7422/6714	9
GO:0010827	regulation of glucose transport	9/140	102/16655	1.64558e-06	2099/7124/207/3553/4780/5578/1432/3643/3630	9
GO:0050728	negative regulation of inflammatory response	9/140	102/16655	1.64558e-06	1588/3565/2950/5468/4790/5465/5467/3630/134	9
GO:0071621	granulocyte chemotaxis	9/140	102/16655	1.64558e-06	3458/3565/3553/6347/5578/5319/3576/3269/7422	9
GO:0030808	regulation of nucleotide biosynthetic process	10/140	134/16655	1.64558e-06	5733/4842/4843/19/5578/1813/1814/1815/2641/4846	10
GO:1900371	regulation of purine nucleotide biosynthetic process	10/140	134/16655	1.64558e-06	5733/4842/4843/19/5578/1813/1814/1815/2641/4846	10
GO:1901655	cellular response to ketone	8/140	74/16655	1.64981e-06	3569/5733/207/6347/842/5468/231/6714	8
GO:0006063	uronic acid metabolic process	6/140	31/16655	1.66109e-06	54575/54576/54577/54600/54657/54658	6
GO:0010574	regulation of vascular endothelial growth factor production	6/140	31/16655	1.66109e-06	5743/3569/3553/1545/6347/3091	6
GO:0010742	macrophage derived foam cell differentiation	6/140	31/16655	1.66109e-06	5468/4790/4792/19/5465/4023	6
GO:0019585	glucuronate metabolic process	6/140	31/16655	1.66109e-06	54575/54576/54577/54600/54657/54658	6
GO:0090077	foam cell differentiation	6/140	31/16655	1.66109e-06	5468/4790/4792/19/5465/4023	6
GO:0007259	JAK-STAT cascade	11/140	170/16655	1.66109e-06	3569/3458/3565/1545/5770/6347/231/2322/3932/5594/5595	11
GO:0097696	STAT cascade	11/140	170/16655	1.66109e-06	3569/3458/3565/1545/5770/6347/231/2322/3932/5594/5595	11
GO:0007187	G-protein coupled receptor signaling pathway, coupled to cyclic nucleotide second messenger	11/140	171/16655	1.75455e-06	3350/5733/6347/3274/3363/134/152/1813/1814/1815/2641	11
GO:0050663	cytokine secretion	11/140	171/16655	1.75455e-06	3569/7124/4843/3458/3553/19/1432/6714/3630/4023/1813	11
GO:0014075	response to amine	7/140	51/16655	1.81522e-06	7054/3383/7389/983/1813/1814/1815	7
GO:0045765	regulation of angiogenesis	12/140	211/16655	1.83309e-06	5743/3569/3553/1545/6347/3162/5578/3576/3091/7422/2152/4846	12
GO:0051924	regulation of calcium ion transport	12/140	211/16655	1.83309e-06	5743/5733/3383/4842/596/6347/581/5319/1813/1815/2641/4846	12
GO:0042136	neurotransmitter biosynthetic process	5/140	17/16655	1.85273e-06	43/7054/4842/4128/1312	5
GO:1900180	regulation of protein localization to nucleus	12/140	212/16655	1.92047e-06	5743/3569/7124/207/3553/142/4792/2932/1432/983/1956/3630	12
GO:0035794	positive regulation of mitochondrial membrane permeability	7/140	52/16655	2.05463e-06	207/596/581/7157/841/2932/5599	7
GO:0043525	positive regulation of neuron apoptotic process	7/140	52/16655	2.05463e-06	836/1728/581/842/3725/7157/2932	7
GO:1904950	negative regulation of establishment of protein localization	12/140	214/16655	2.11105e-06	3569/5733/7124/4842/3156/3553/4792/2932/3630/1813/1814/1815	12
GO:0031669	cellular response to nutrient levels	11/140	175/16655	2.17098e-06	3383/596/3162/4780/5468/3725/7157/6721/1312/8644/213	11
GO:0019233	sensory perception of pain	9/140	106/16655	2.18407e-06	5743/4842/240/5742/1312/5594/5595/134/152	9
GO:0030879	mammary gland development	10/140	139/16655	2.21042e-06	2099/207/581/2194/595/7498/3091/5594/7422/6714	10
GO:0010906	regulation of glucose metabolic process	9/140	107/16655	2.35718e-06	3569/207/7157/2932/5465/3643/6714/3630/2641	9
GO:0010573	vascular endothelial growth factor production	6/140	33/16655	2.36579e-06	5743/3569/3553/1545/6347/3091	6
GO:0051385	response to mineralocorticoid	6/140	33/16655	2.36579e-06	7054/581/595/2353/5742/6714	6
GO:0018107	peptidyl-threonine phosphorylation	8/140	79/16655	2.6095e-06	207/596/2932/5578/983/5594/5599/2641	8
GO:0071229	cellular response to acid chemical	11/140	179/16655	2.68287e-06	7124/207/3553/6347/5468/4313/19/3091/1956/6714/8644	11
GO:0030595	leukocyte chemotaxis	11/140	180/16655	2.82773e-06	1588/3569/3458/3565/3553/6347/5578/5319/3576/3269/7422	11
GO:0071312	cellular response to alkaloid	6/140	34/16655	2.82773e-06	5970/7124/7054/3383/4790/5328	6
GO:0019318	hexose metabolic process	13/140	264/16655	2.86179e-06	3569/7124/207/7157/2932/1432/5465/231/5467/3643/6714/3630/2641	13
GO:0002761	regulation of myeloid leukocyte differentiation	9/140	110/16655	2.93574e-06	7124/5925/3458/3565/3725/841/5578/2353/760	9
GO:0031281	positive regulation of cyclase activity	7/140	55/16655	2.95141e-06	4842/4843/5578/1432/5595/5599/4846	7
GO:1902108	regulation of mitochondrial membrane permeability involved in apoptotic process	7/140	55/16655	2.95141e-06	207/596/581/7157/841/2932/5599	7
GO:0044236	multicellular organism metabolic process	10/140	144/16655	2.99264e-06	3569/6347/5468/4313/4318/5319/4312/3091/5467/8644	10
GO:0031348	negative regulation of defense response	10/140	145/16655	3.17762e-06	1588/3565/2950/5468/4790/5465/5467/3630/134/1813	10
GO:0048167	regulation of synaptic plasticity	10/140	145/16655	3.17762e-06	5743/4842/2932/3274/3269/627/5594/57406/134/1813	10
GO:0032147	activation of protein kinase activity	17/140	468/16655	3.26144e-06	7124/3553/5770/1432/5319/983/5594/7422/1956/3643/5595/6714/3630/134/152/1813/1815	17
GO:0071385	cellular response to glucocorticoid stimulus	7/140	56/16655	3.3132e-06	3569/6347/2950/842/2322/54658/196	7
GO:0010907	positive regulation of glucose metabolic process	6/140	35/16655	3.31594e-06	207/5465/3643/6714/3630/2641	6
GO:0008585	female gonad development	9/140	112/16655	3.35842e-06	2099/3383/596/581/7422/196/2100/3643/4846	9
GO:0001776	leukocyte homeostasis	8/140	82/16655	3.37025e-06	836/3569/207/596/3458/581/2322/3091	8
GO:0031100	organ regeneration	8/140	82/16655	3.37025e-06	6347/2950/5468/595/2322/54658/983/1017	8
GO:0009749	response to glucose	11/140	184/16655	3.41451e-06	836/7054/3383/3156/3553/1432/3091/5467/5328/4023/2641	11
GO:0033500	carbohydrate homeostasis	12/140	225/16655	3.41658e-06	3569/7054/207/3383/3156/3553/5468/3091/5328/3643/3630/2641	12
GO:0042593	glucose homeostasis	12/140	225/16655	3.41658e-06	3569/7054/207/3383/3156/3553/5468/3091/5328/3643/3630/2641	12
GO:0001935	endothelial cell proliferation	9/140	113/16655	3.5739e-06	207/6347/3162/3725/5578/7498/3091/7422/2152	9
GO:0008643	carbohydrate transport	11/140	185/16655	3.5739e-06	2099/7124/207/3553/4780/5578/1432/5319/5467/3643/3630	11
GO:0008306	associative learning	8/140	83/16655	3.6409e-06	3156/2353/3274/3269/3091/1813/1814/1815	8
GO:0018210	peptidyl-threonine modification	8/140	83/16655	3.6409e-06	207/596/2932/5578/983/5594/5599/2641	8
GO:0051897	positive regulation of protein kinase B signaling	8/140	83/16655	3.6409e-06	3569/7124/1956/3643/6714/8644/2152/3630	8
GO:0048520	positive regulation of behavior	10/140	148/16655	3.72098e-06	3569/5733/3565/3553/6347/5578/3576/7422/2152/213	10
GO:0046824	positive regulation of nucleocytoplasmic transport	9/140	114/16655	3.80736e-06	5743/3569/7124/3553/142/2932/1432/983/1956	9
GO:0030225	macrophage differentiation	6/140	36/16655	3.83552e-06	5925/142/4318/841/5578/7422	6
GO:0006006	glucose metabolic process	12/140	229/16655	4.04632e-06	3569/7124/207/7157/2932/1432/5465/5467/3643/6714/3630/2641	12
GO:0001836	release of cytochrome c from mitochondria	7/140	58/16655	4.07663e-06	207/596/581/3725/4318/7157/6648	7
GO:0033013	tetrapyrrole metabolic process	7/140	58/16655	4.07663e-06	7389/1544/3162/4363/1543/54657/54658	7
GO:0055094	response to lipoprotein particle	5/140	20/16655	4.1507e-06	6347/5468/19/6721/2152	5
GO:0052652	cyclic purine nucleotide metabolic process	10/140	150/16655	4.15188e-06	5733/4842/4843/19/5578/1813/1814/1815/2641/4846	10
GO:1901361	organic cyclic compound catabolic process	17/140	479/16655	4.30198e-06	1576/836/1544/4128/3162/581/7157/5465/7498/1543/3091/54657/54658/847/1312/3643/3630	17
GO:0009190	cyclic nucleotide biosynthetic process	10/140	151/16655	4.39653e-06	5733/4842/4843/19/5578/1813/1814/1815/2641/4846	10
GO:0006778	porphyrin-containing compound metabolic process	6/140	37/16655	4.46202e-06	7389/1544/3162/1543/54657/54658	6
GO:0032309	icosanoid secretion	6/140	37/16655	4.46202e-06	4843/3553/5319/1813/1814/1815	6
GO:0001503	ossification	15/140	374/16655	4.50478e-06	5743/43/2099/3569/7124/207/596/2194/4313/4318/3091/246/847/1956/5599	15
GO:0052548	regulation of endopeptidase activity	15/140	374/16655	4.50478e-06	836/3569/7124/207/581/842/5468/332/4318/841/7498/3932/7422/6714/2152	15
GO:0046545	development of primary female sexual characteristics	9/140	117/16655	4.60603e-06	2099/3383/596/581/7422/196/2100/3643/4846	9
GO:0001890	placenta development	10/140	152/16655	4.60603e-06	5743/2099/207/5468/841/1432/3091/5467/5594/1956	10
GO:0046165	alcohol biosynthetic process	10/140	152/16655	4.60603e-06	1576/43/7124/3156/3458/3553/4790/231/3269/8644	10
GO:0048145	regulation of fibroblast proliferation	8/140	86/16655	4.61953e-06	2099/2950/581/5468/3725/7157/5319/1956	8
GO:0009308	amine metabolic process	12/140	233/16655	4.71719e-06	3350/43/6817/4128/1728/5444/5319/1543/1312/590/3630/1815	12
GO:0009187	cyclic nucleotide metabolic process	11/140	192/16655	4.9321e-06	5733/4842/4843/19/5578/7422/1813/1814/1815/2641/4846	11
GO:0031331	positive regulation of cellular catabolic process	14/140	327/16655	4.9621e-06	7124/5925/207/3458/3553/5770/4780/581/2932/5465/3091/983/3643/3630	14
GO:0032371	regulation of sterol transport	6/140	38/16655	5.14551e-06	5468/4790/4792/19/5444/6721	6
GO:0032374	regulation of cholesterol transport	6/140	38/16655	5.14551e-06	5468/4790/4792/19/5444/6721	6
GO:0009651	response to salt stress	5/140	21/16655	5.20503e-06	7124/7054/581/7157/3091	5
GO:0050995	negative regulation of lipid catabolic process	5/140	21/16655	5.20503e-06	7124/207/3553/3630/134	5
GO:1902176	negative regulation of oxidative stress-induced intrinsic apoptotic signaling pathway	5/140	21/16655	5.20503e-06	207/4780/6648/3091/3630	5
GO:0033135	regulation of peptidyl-serine phosphorylation	9/140	120/16655	5.59201e-06	3569/7124/207/596/3458/581/2932/7422/2641	9
GO:0002224	toll-like receptor signaling pathway	10/140	156/16655	5.72234e-06	5970/3725/4790/4792/841/1432/2353/5594/5595/5599	10
GO:0048144	fibroblast proliferation	8/140	89/16655	5.88815e-06	2099/2950/581/5468/3725/7157/5319/1956	8
GO:0045444	fat cell differentiation	11/140	196/16655	5.93011e-06	5743/3569/7124/207/5468/595/2932/1432/5467/3643/3630	11
GO:0043618	regulation of transcription from RNA polymerase II promoter in response to stress	7/140	62/16655	6.1502e-06	3162/4780/3725/7157/768/3091/7422	7
GO:0060135	maternal process involved in female pregnancy	7/140	62/16655	6.1502e-06	5743/2099/207/6347/231/3091/5467	7
GO:0045927	positive regulation of growth	12/140	240/16655	6.27732e-06	4137/207/596/2932/1432/5467/627/983/7422/3643/3630/1813	12
GO:0043280	positive regulation of cysteine-type endopeptidase activity involved in apoptotic process	9/140	122/16655	6.34191e-06	836/7124/581/842/5468/841/7498/3932/2152	9
GO:0035902	response to immobilization stress	5/140	22/16655	6.57198e-06	7054/1544/5468/2353/1543	5
GO:0048639	positive regulation of developmental growth	10/140	159/16655	6.7083e-06	4137/596/2932/1432/5467/627/983/7422/3643/1813	10
GO:0001659	temperature homeostasis	6/140	40/16655	6.82319e-06	5743/5733/7124/3553/134/1813	6
GO:0071715	icosanoid transport	6/140	40/16655	6.82319e-06	4843/3553/5319/1813/1814/1815	6
GO:1901571	fatty acid derivative transport	6/140	40/16655	6.82319e-06	4843/3553/5319/1813/1814/1815	6
GO:0033138	positive regulation of peptidyl-serine phosphorylation	8/140	91/16655	6.82319e-06	3569/7124/207/596/3458/2932/7422/2641	8
GO:0043467	regulation of generation of precursor metabolites and energy	8/140	91/16655	6.82319e-06	207/4843/7157/2932/5465/3091/3643/3630	8
GO:0031638	zymogen activation	9/140	124/16655	7.16122e-06	836/7124/581/842/5468/841/7498/3932/2152	9
GO:0046902	regulation of mitochondrial membrane permeability	7/140	64/16655	7.483e-06	207/596/581/7157/841/2932/5599	7
GO:1900543	negative regulation of purine nucleotide metabolic process	7/140	64/16655	7.483e-06	5733/7157/5578/5465/1813/1814/1815	7
GO:0002262	myeloid cell homeostasis	9/140	125/16655	7.60327e-06	836/3569/5925/3458/3162/581/1432/3091/7422	9
GO:0007270	neuron-neuron synaptic transmission	9/140	125/16655	7.60327e-06	5743/7054/760/627/766/134/1813/1814/1815	9
GO:0048871	multicellular organismal homeostasis	14/140	341/16655	7.7624e-06	5743/5733/7124/596/3553/581/231/760/2322/7422/6714/213/134/1813	14
GO:0006984	ER-nucleus signaling pathway	6/140	41/16655	7.815e-06	5770/6347/4780/7157/2932/3576	6
GO:0042110	T cell activation	16/140	447/16655	7.81521e-06	836/3569/207/3383/596/3458/3565/3553/6347/581/7157/841/2322/3932/6714/3630	16
GO:0070489	T cell aggregation	16/140	447/16655	7.81521e-06	836/3569/207/3383/596/3458/3565/3553/6347/581/7157/841/2322/3932/6714/3630	16
GO:0019439	aromatic compound catabolic process	16/140	448/16655	8.00095e-06	836/4128/3162/581/7157/5444/5465/7498/1543/3091/54657/54658/847/1312/3643/3630	16
GO:0071593	lymphocyte aggregation	16/140	448/16655	8.00095e-06	836/3569/207/3383/596/3458/3565/3553/6347/581/7157/841/2322/3932/6714/3630	16
GO:0032103	positive regulation of response to external stimulus	13/140	293/16655	8.00095e-06	5743/3569/5733/7124/3565/3553/6347/5578/3576/3091/7422/2152/4023	13
GO:0030336	negative regulation of cell migration	11/140	203/16655	8.00095e-06	1588/596/3565/1545/6347/3162/2932/5467/57406/134/1813	11
GO:0009110	vitamin biosynthetic process	5/140	23/16655	8.02499e-06	1576/7124/3458/3553/4790	5
GO:0001541	ovarian follicle development	7/140	65/16655	8.13881e-06	2099/3383/596/581/7422/196/2100	7
GO:0052547	regulation of peptidase activity	15/140	395/16655	8.19635e-06	836/3569/7124/207/581/842/5468/332/4318/841/7498/3932/7422/6714/2152	15
GO:0060627	regulation of vesicle-mediated transport	15/140	395/16655	8.19635e-06	7124/3458/3565/3553/6401/5770/6347/3162/5468/246/5594/7422/5595/6714/1813	15
GO:0010822	positive regulation of mitochondrion organization	10/140	164/16655	8.51801e-06	207/596/581/4318/7157/841/2932/6721/3091/5599	10
GO:0045980	negative regulation of nucleotide metabolic process	7/140	66/16655	8.96956e-06	5733/7157/5578/5465/1813/1814/1815	7
GO:0010632	regulation of epithelial cell migration	10/140	165/16655	8.96956e-06	5743/207/3458/3565/3725/4318/5578/3091/7422/6714	10
GO:0044259	multicellular organismal macromolecule metabolic process	9/140	128/16655	8.98538e-06	3569/6347/5468/4313/4318/4312/3091/5467/8644	9
GO:0051092	positive regulation of NF-kappaB transcription factor activity	9/140	128/16655	8.98538e-06	5970/7124/3383/3553/4790/4792/5319/847/3630	9
GO:0097194	execution phase of apoptosis	8/140	95/16655	9.08106e-06	836/4137/207/7153/581/7157/841/2641	8
GO:0048010	vascular endothelial growth factor receptor signaling pathway	13/140	297/16655	9.10607e-06	207/3553/5770/6347/5578/1432/3091/5594/7422/1956/5595/6714/4846	13
GO:0009408	response to heat	10/140	166/16655	9.38897e-06	3569/207/4842/3553/6347/3162/2932/5594/5595/4846	10
GO:0070486	leukocyte aggregation	16/140	455/16655	9.54254e-06	836/3569/207/3383/596/3458/3565/3553/6347/581/7157/841/2322/3932/6714/3630	16
GO:0001936	regulation of endothelial cell proliferation	8/140	96/16655	9.7643e-06	207/6347/3725/5578/7498/3091/7422/2152	8
GO:0043620	regulation of DNA-templated transcription in response to stress	7/140	67/16655	9.76701e-06	3162/4780/3725/7157/768/3091/7422	7
GO:0048521	negative regulation of behavior	7/140	67/16655	9.76701e-06	1588/5733/6347/2100/3630/134/1813	7
GO:0048011	neurotrophin TRK receptor signaling pathway	15/140	402/16655	9.9525e-06	836/5970/207/842/4790/4792/2932/5578/1432/3932/5594/1956/5595/5599/6714	15
GO:0051100	negative regulation of binding	9/140	130/16655	1.00175e-05	1565/3162/581/3725/4792/2932/5465/5595/5599	9
GO:0051781	positive regulation of cell division	9/140	130/16655	1.00175e-05	5925/3553/332/847/7422/3643/3630/1813/1814	9
GO:0031620	regulation of fever generation	4/140	11/16655	1.00175e-05	5743/5733/7124/3553	4
GO:0034776	response to histamine	4/140	11/16655	1.00175e-05	3269/1813/1814/1815	4
GO:0050715	positive regulation of cytokine secretion	8/140	97/16655	1.04133e-05	7124/3458/3553/1432/6714/3630/4023/1813	8
GO:0001938	positive regulation of endothelial cell proliferation	7/140	68/16655	1.0655e-05	207/6347/3725/5578/3091/7422/2152	7
GO:0046889	positive regulation of lipid biosynthetic process	7/140	68/16655	1.0655e-05	5743/7124/207/3458/3553/57406/3630	7
GO:0038179	neurotrophin signaling pathway	15/140	405/16655	1.07352e-05	836/5970/207/842/4790/4792/2932/5578/1432/3932/5594/1956/5595/5599/6714	15
GO:0044089	positive regulation of cellular component biogenesis	15/140	405/16655	1.07352e-05	7124/4137/3383/581/3725/7157/2932/5578/4312/627/246/7422/196/5599/6714	15
GO:0022602	ovulation cycle process	8/140	98/16655	1.11175e-05	2099/3383/596/581/7422/196/2100/4846	8
GO:0042035	regulation of cytokine biosynthetic process	8/140	98/16655	1.11175e-05	3569/5970/7124/3458/3565/3553/3162/4790	8
GO:0042307	positive regulation of protein import into nucleus	8/140	98/16655	1.11175e-05	5743/3569/7124/3553/142/1432/983/1956	8
GO:0046660	female sex differentiation	9/140	132/16655	1.11461e-05	2099/3383/596/581/7422/196/2100/3643/4846	9
GO:0046890	regulation of lipid biosynthetic process	9/140	132/16655	1.11461e-05	5743/7124/207/3458/3553/4790/57406/8644/3630	9
GO:2001056	positive regulation of cysteine-type endopeptidase activity	9/140	132/16655	1.11461e-05	836/7124/581/842/5468/841/7498/3932/2152	9
GO:0034976	response to endoplasmic reticulum stress	12/140	256/16655	1.11736e-05	596/3458/5770/6347/4780/581/595/3725/7157/2932/3576/246	12
GO:1901565	organonitrogen compound catabolic process	14/140	355/16655	1.15449e-05	1576/4842/4843/1565/4128/3162/7157/7498/4759/54657/54658/847/1312/4846	14
GO:0090559	regulation of membrane permeability	7/140	69/16655	1.15449e-05	207/596/581/7157/841/2932/5599	7
GO:0032800	receptor biosynthetic process	5/140	25/16655	1.17237e-05	43/7124/5468/5465/3091	5
GO:0043254	regulation of protein complex assembly	14/140	356/16655	1.18844e-05	7124/4137/3383/581/3725/7157/2932/4312/246/7422/196/5599/6714/3630	14
GO:2000146	negative regulation of cell motility	11/140	213/16655	1.19503e-05	1588/596/3565/1545/6347/3162/2932/5467/57406/134/1813	11
GO:0071322	cellular response to carbohydrate stimulus	9/140	134/16655	1.24792e-05	7054/3383/3156/3553/4790/5578/3091/5328/2641	9
GO:0046626	regulation of insulin receptor signaling pathway	6/140	45/16655	1.26541e-05	5970/3553/5770/5578/6714/3630	6
GO:0006091	generation of precursor metabolites and energy	16/140	467/16655	1.27199e-05	207/4843/1544/581/2194/7157/2932/5578/5465/3091/5467/847/3643/3630/152/2641	16
GO:0042692	muscle cell differentiation	14/140	360/16655	1.3426e-05	7124/5925/207/4842/596/3156/3565/3756/2932/1432/4759/5467/983/7422	14
GO:1904591	positive regulation of protein import	8/140	101/16655	1.36355e-05	5743/3569/7124/3553/142/1432/983/1956	8
GO:0042133	neurotransmitter metabolic process	5/140	26/16655	1.41164e-05	43/7054/4842/4128/1312	5
GO:0045742	positive regulation of epidermal growth factor receptor signaling pathway	5/140	26/16655	1.41164e-05	2099/4318/2100/134/152	5
GO:0051412	response to corticosterone	5/140	26/16655	1.41164e-05	7054/581/595/2353/5742	5
GO:1900739	regulation of protein insertion into mitochondrial membrane involved in apoptotic signaling pathway	5/140	26/16655	1.41164e-05	207/596/7157/841/5599	5
GO:1900740	positive regulation of protein insertion into mitochondrial membrane involved in apoptotic signaling pathway	5/140	26/16655	1.41164e-05	207/596/7157/841/5599	5
GO:0009404	toxin metabolic process	4/140	12/16655	1.41282e-05	7054/1544/1545/1543	4
GO:0032025	response to cobalt ion	4/140	12/16655	1.41282e-05	836/842/841/3091	4
GO:0045188	regulation of circadian sleep/wake cycle, non-REM sleep	4/140	12/16655	1.41282e-05	3569/5733/213/134	4
GO:0009409	response to cold	6/140	46/16655	1.41282e-05	3569/5468/4792/841/2353/4023	6
GO:1902930	regulation of alcohol biosynthetic process	6/140	46/16655	1.41282e-05	7124/3458/3553/4790/3269/8644	6
GO:0061180	mammary gland epithelium development	7/140	72/16655	1.49315e-05	2099/207/581/595/3091/5594/6714	7
GO:0042306	regulation of protein import into nucleus	10/140	177/16655	1.55437e-05	5743/3569/7124/3553/142/4792/2932/1432/983/1956	10
GO:0007173	epidermal growth factor receptor signaling pathway	14/140	366/16655	1.58904e-05	2099/207/842/4318/2932/5578/3932/5594/1956/2100/5595/6714/134/152	14
GO:0045840	positive regulation of mitotic nuclear division	6/140	47/16655	1.59743e-05	5925/3553/332/3643/3630/1814	6
GO:0007588	excretion	7/140	73/16655	1.62326e-05	5733/3162/54577/1312/134/1813/1814	7
GO:0046427	positive regulation of JAK-STAT cascade	7/140	73/16655	1.62326e-05	3569/3458/3565/1545/231/2322/3932	7
GO:1904894	positive regulation of STAT cascade	7/140	73/16655	1.62326e-05	3569/3458/3565/1545/231/2322/3932	7
GO:0038095	Fc-epsilon receptor signaling pathway	13/140	316/16655	1.65566e-05	5970/207/842/3725/4790/4792/2932/2353/3932/5594/1956/5595/5599	13
GO:1901186	positive regulation of ERBB signaling pathway	5/140	27/16655	1.67989e-05	2099/4318/2100/134/152	5
GO:0032845	negative regulation of homeostatic process	10/140	179/16655	1.69638e-05	4842/596/3156/142/581/3932/1312/6714/134/1813	10
GO:1904589	regulation of protein import	10/140	181/16655	1.87118e-05	5743/3569/7124/3553/142/4792/2932/1432/983/1956	10
GO:0045598	regulation of fat cell differentiation	8/140	106/16655	1.89133e-05	5743/3569/7124/207/5468/1432/5467/3630	8
GO:1903651	positive regulation of cytoplasmic transport	12/140	271/16655	1.90532e-05	5743/3569/7124/3553/142/581/2932/6721/1432/5319/983/1956	12
GO:0042326	negative regulation of phosphorylation	15/140	427/16655	1.91482e-05	836/3569/5925/207/3156/3553/5770/2950/581/3725/2932/5578/5465/7498/3643	15
GO:0038127	ERBB signaling pathway	14/140	373/16655	1.94022e-05	2099/207/842/4318/2932/5578/3932/5594/1956/2100/5595/6714/134/152	14
GO:0010745	negative regulation of macrophage derived foam cell differentiation	4/140	13/16655	1.96311e-05	5468/4792/19/5465	4
GO:0031652	positive regulation of heat generation	4/140	13/16655	1.96311e-05	5743/5733/7124/3553	4
GO:0042748	circadian sleep/wake cycle, non-REM sleep	4/140	13/16655	1.96311e-05	3569/5733/213/134	4
GO:0002675	positive regulation of acute inflammatory response	5/140	28/16655	1.99452e-05	5743/3569/5733/7124/3553	5
GO:0001667	ameboidal-type cell migration	13/140	322/16655	1.99452e-05	5743/207/3458/3565/1545/3725/4318/5578/3091/5467/7422/6714/4846	13
GO:0002683	negative regulation of immune system process	14/140	375/16655	2.04355e-05	836/1588/7124/3565/6347/3162/4780/5468/4792/2322/246/3630/134/1813	14
GO:0009895	negative regulation of catabolic process	11/140	227/16655	2.07847e-05	5970/7124/207/4843/596/3553/7157/5465/1956/3630/134	11
GO:0007346	regulation of mitotic cell cycle	16/140	488/16655	2.10902e-05	5925/207/7153/596/3553/332/595/7157/5578/1543/983/1956/3643/1017/3630/1814	16
GO:0008406	gonad development	11/140	228/16655	2.16113e-05	2099/3383/596/581/595/7422/196/2100/3643/8644/4846	11
GO:0038093	Fc receptor signaling pathway	14/140	378/16655	2.22591e-05	5970/207/842/3725/4790/4792/2932/2353/3932/5594/1956/5595/5599/6714	14
GO:0042220	response to cocaine	6/140	50/16655	2.2316e-05	4842/142/581/1813/1814/1815	6
GO:0010950	positive regulation of endopeptidase activity	9/140	145/16655	2.23646e-05	836/7124/581/842/5468/841/7498/3932/2152	9
GO:0015980	energy derivation by oxidation of organic compounds	14/140	379/16655	2.28352e-05	207/4843/1544/581/2194/7157/2932/5578/3091/847/3643/3630/152/2641	14
GO:0001963	synaptic transmission, dopaminergic	5/140	29/16655	2.35019e-05	5743/7054/1813/1814/1815	5
GO:0044062	regulation of excretion	5/140	29/16655	2.35019e-05	5733/1312/134/1813/1814	5
GO:1902175	regulation of oxidative stress-induced intrinsic apoptotic signaling pathway	5/140	29/16655	2.35019e-05	207/4780/6648/3091/3630	5
GO:0050865	regulation of cell activation	16/140	493/16655	2.36651e-05	836/3569/5733/207/596/3458/3565/3553/6347/3162/5578/2322/3932/196/6714/4846	16
GO:0042089	cytokine biosynthetic process	8/140	110/16655	2.41247e-05	3569/5970/7124/3458/3565/3553/3162/4790	8
GO:0007566	embryo implantation	6/140	51/16655	2.467e-05	5743/3553/4313/4318/5467/5328	6
GO:0010332	response to gamma radiation	6/140	51/16655	2.467e-05	596/3553/6347/581/7157/5423	6
GO:0015909	long-chain fatty acid transport	6/140	51/16655	2.467e-05	207/5468/5319/1813/1814/1815	6
GO:0045600	positive regulation of fat cell differentiation	6/140	51/16655	2.467e-05	5743/207/5468/1432/5467/3630	6
GO:0045137	development of primary sexual characteristics	11/140	233/16655	2.59717e-05	2099/3383/596/581/595/7422/196/2100/3643/8644/4846	11
GO:0060326	cell chemotaxis	11/140	233/16655	2.59717e-05	1588/3569/3458/3565/3553/6347/5578/5319/3576/3269/7422	11
GO:0001660	fever generation	4/140	14/16655	2.62931e-05	5743/5733/7124/3553	4
GO:0055098	response to low-density lipoprotein particle	4/140	14/16655	2.62931e-05	5468/19/6721/2152	4
GO:0042107	cytokine metabolic process	8/140	112/16655	2.72073e-05	3569/5970/7124/3458/3565/3553/3162/4790	8
GO:0050707	regulation of cytokine secretion	9/140	149/16655	2.72478e-05	3569/7124/3458/3553/1432/6714/3630/4023/1813	9
GO:0050994	regulation of lipid catabolic process	6/140	52/16655	2.7385e-05	7124/207/3553/5465/3630/134	6
GO:0070849	response to epidermal growth factor	5/140	30/16655	2.7385e-05	207/2950/5594/1956/5595	5
GO:0009896	positive regulation of catabolic process	14/140	387/16655	2.81708e-05	7124/5925/207/3458/3553/5770/4780/581/2932/5465/3091/983/3643/3630	14
GO:0019218	regulation of steroid metabolic process	7/140	80/16655	2.81708e-05	7124/3458/3553/4790/54576/54658/8644	7
GO:0033555	multicellular organismal response to stress	7/140	80/16655	2.81708e-05	3350/4842/596/627/1312/2100/1815	7
GO:0002221	pattern recognition receptor signaling pathway	10/140	191/16655	2.84165e-05	5970/3725/4790/4792/841/1432/2353/5594/5595/5599	10
GO:0001933	negative regulation of protein phosphorylation	14/140	389/16655	2.96867e-05	836/3569/5925/207/3156/3553/5770/2950/581/3725/2932/5578/7498/3643	14
GO:0022407	regulation of cell-cell adhesion	14/140	389/16655	2.96867e-05	836/3569/5733/7124/207/3458/3565/3553/6347/5578/5465/3932/246/6714	14
GO:0002758	innate immune response-activating signal transduction	12/140	285/16655	2.99752e-05	5970/3553/3725/4790/4792/841/1432/2353/5594/5595/5599/6714	12
GO:0045089	positive regulation of innate immune response	13/140	336/16655	3.00574e-05	5970/3553/3725/4313/4790/4792/841/1432/2353/5594/5595/5599/6714	13
GO:0051339	regulation of lyase activity	7/140	81/16655	3.02835e-05	4842/4843/5578/1813/1814/1815/4846	7
GO:1904019	epithelial cell apoptotic process	7/140	81/16655	3.02835e-05	3569/5925/3383/3565/4780/841/8644	7
GO:0003012	muscle system process	14/140	390/16655	3.03184e-05	5743/5733/4842/3553/3162/142/2932/5578/3363/5742/134/152/1813/4846	14
GO:0050729	positive regulation of inflammatory response	8/140	114/16655	3.03184e-05	5743/3569/5733/7124/3553/6347/5578/4023	8
GO:0032872	regulation of stress-activated MAPK cascade	10/140	193/16655	3.07299e-05	7124/207/3156/3553/5770/2950/7498/5594/7422/5595	10
GO:0032228	regulation of synaptic transmission, GABAergic	5/140	31/16655	3.16714e-05	760/627/766/134/1813	5
GO:1902692	regulation of neuroblast proliferation	5/140	31/16655	3.16714e-05	7157/3091/627/7422/1813	5
GO:0070302	regulation of stress-activated protein kinase signaling cascade	10/140	194/16655	3.20199e-05	7124/207/3156/3553/5770/2950/7498/5594/7422/5595	10
GO:0031623	receptor internalization	7/140	82/16655	3.25211e-05	43/5733/6401/3576/7422/1813/1814	7
GO:0046434	organophosphate catabolic process	9/140	153/16655	3.27869e-05	7157/5444/5465/7498/3091/847/57406/3643/3630	9
GO:0008542	visual learning	6/140	54/16655	3.30993e-05	3156/3274/3269/3091/1813/1814	6
GO:0046456	icosanoid biosynthetic process	6/140	54/16655	3.30993e-05	5743/240/5319/5742/246/8644	6
GO:1901570	fatty acid derivative biosynthetic process	6/140	54/16655	3.30993e-05	5743/240/5319/5742/246/8644	6
GO:0031650	regulation of heat generation	4/140	15/16655	3.3979e-05	5743/5733/7124/3553	4
GO:0033197	response to vitamin E	4/140	15/16655	3.3979e-05	4842/5468/595/847	4
GO:0046689	response to mercury ion	4/140	15/16655	3.3979e-05	3565/7389/2950/213	4
GO:0051580	regulation of neurotransmitter uptake	4/140	15/16655	3.3979e-05	4842/1813/1814/1815	4
GO:0070989	oxidative demethylation	4/140	15/16655	3.3979e-05	1576/1559/1544/1565	4
GO:0006694	steroid biosynthetic process	9/140	154/16655	3.40989e-05	1576/1588/7124/3156/3458/3553/4790/231/8644	9
GO:0090257	regulation of muscle system process	10/140	196/16655	3.44187e-05	5743/5733/4842/142/2932/5578/5742/134/152/4846	10
GO:0002218	activation of innate immune response	12/140	291/16655	3.58107e-05	5970/3553/3725/4790/4792/841/1432/2353/5594/5595/5599/6714	12
GO:0032409	regulation of transporter activity	10/140	197/16655	3.58925e-05	4842/596/5468/4318/5444/3643/3630/1813/1814/1815	10
GO:0016572	histone phosphorylation	5/140	32/16655	3.63191e-05	3553/5578/983/5595/1017	5
GO:1903792	negative regulation of anion transport	5/140	32/16655	3.63191e-05	207/4842/3553/134/1813	5
GO:0051271	negative regulation of cellular component movement	11/140	243/16655	3.64849e-05	1588/596/3565/1545/6347/3162/2932/5467/57406/134/1813	11
GO:0010952	positive regulation of peptidase activity	9/140	156/16655	3.74746e-05	836/7124/581/842/5468/841/7498/3932/2152	9
GO:0030100	regulation of endocytosis	10/140	199/16655	3.89426e-05	7124/3553/6401/5770/6347/5468/246/7422/6714/1813	10
GO:0001975	response to amphetamine	5/140	33/16655	4.20683e-05	7054/3383/1813/1814/1815	5
GO:0006110	regulation of glycolytic process	5/140	33/16655	4.20683e-05	7157/5465/3091/3643/3630	5
GO:0071548	response to dexamethasone	5/140	33/16655	4.20683e-05	3569/3553/6347/842/2100	5
GO:1903202	negative regulation of oxidative stress-induced cell death	5/140	33/16655	4.20683e-05	207/4780/6648/3091/3630	5
GO:0016051	carbohydrate biosynthetic process	10/140	201/16655	4.22095e-05	3569/207/4790/2932/5465/231/3269/3643/3630/2641	10
GO:0008625	extrinsic apoptotic signaling pathway via death domain receptors	7/140	86/16655	4.30873e-05	7124/3383/596/3162/581/841/4846	7
GO:0055123	digestive system development	9/140	159/16655	4.322e-05	7124/5925/596/3274/3576/1543/3091/1956/3643	9
GO:0033604	negative regulation of catecholamine secretion	4/140	16/16655	4.38646e-05	5733/5742/152/1813	4
GO:0042698	ovulation cycle	8/140	121/16655	4.49268e-05	2099/3383/596/581/7422/196/2100/4846	8
GO:0051146	striated muscle cell differentiation	11/140	249/16655	4.51498e-05	5925/207/4842/596/3565/3756/2932/1432/4759/983/7422	11
GO:0030316	osteoclast differentiation	7/140	87/16655	4.61849e-05	7124/3458/3565/1432/2353/760/6714	7
GO:0090316	positive regulation of intracellular protein transport	11/140	250/16655	4.67529e-05	5743/3569/7124/3553/6347/142/2932/6721/1432/983/1956	11
GO:0009267	cellular response to starvation	8/140	122/16655	4.73882e-05	596/4780/3725/7157/6721/1312/8644/213	8
GO:0050921	positive regulation of chemotaxis	8/140	122/16655	4.73882e-05	3569/3565/3553/6347/5578/3576/7422/2152	8
GO:0001654	eye development	13/140	353/16655	4.79696e-05	43/7054/596/3565/1545/581/3725/1543/3091/627/7422/1017/1815	13
GO:0090068	positive regulation of cell cycle process	11/140	251/16655	4.82612e-05	5925/3553/332/595/7157/1543/3643/1017/3630/1813/1814	11
GO:0032963	collagen metabolic process	8/140	123/16655	5.00323e-05	3569/6347/5468/4313/4318/4312/3091/5467	8
GO:0097306	cellular response to alcohol	8/140	123/16655	5.00323e-05	2099/3569/6347/842/19/54658/1956/2100	8
GO:0043154	negative regulation of cysteine-type endopeptidase activity involved in apoptotic process	7/140	89/16655	5.28443e-05	3569/207/332/4318/841/7422/6714	7
GO:0007632	visual behavior	6/140	59/16655	5.28443e-05	3156/3274/3269/3091/1813/1814	6
GO:0051785	positive regulation of nuclear division	6/140	59/16655	5.28443e-05	5925/3553/332/3643/3630/1814	6
GO:1900407	regulation of cellular response to oxidative stress	6/140	59/16655	5.28443e-05	7124/207/4780/6648/3091/3630	6
GO:1903533	regulation of protein targeting	12/140	304/16655	5.33295e-05	5743/3569/7124/3553/6347/142/4792/2932/6721/1432/983/1956	12
GO:0032459	regulation of protein oligomerization	5/140	35/16655	5.49494e-05	581/7157/4312/6714/3630	5
GO:1900408	negative regulation of cellular response to oxidative stress	5/140	35/16655	5.49494e-05	207/4780/6648/3091/3630	5
GO:1902883	negative regulation of response to oxidative stress	5/140	35/16655	5.49494e-05	207/4780/6648/3091/3630	5
GO:0060749	mammary gland alveolus development	4/140	17/16655	5.5331e-05	2099/595/3091/7422	4
GO:0061377	mammary gland lobule development	4/140	17/16655	5.5331e-05	2099/595/3091/7422	4
GO:0051937	catecholamine transport	6/140	60/16655	5.76368e-05	5733/5742/152/1813/1814/1815	6
GO:1900076	regulation of cellular response to insulin stimulus	6/140	60/16655	5.76368e-05	5970/3553/5770/5578/6714/3630	6
GO:0001662	behavioral fear response	5/140	36/16655	6.26523e-05	3350/596/627/2100/1815	5
GO:0002209	behavioral defense response	5/140	36/16655	6.26523e-05	3350/596/627/2100/1815	5
GO:0030818	negative regulation of cAMP biosynthetic process	5/140	36/16655	6.26523e-05	5733/5578/1813/1814/1815	5
GO:0032094	response to food	5/140	36/16655	6.26523e-05	207/4353/5465/1543/2641	5
GO:0042108	positive regulation of cytokine biosynthetic process	6/140	61/16655	6.30291e-05	5970/7124/3458/3565/3553/3162	6
GO:2000117	negative regulation of cysteine-type endopeptidase activity	7/140	92/16655	6.44371e-05	3569/207/332/4318/841/7422/6714	7
GO:0006874	cellular calcium ion homeostasis	13/140	364/16655	6.44371e-05	2099/5733/4842/596/3553/6347/581/5578/5319/3932/1813/1814/1815	13
GO:0061041	regulation of wound healing	8/140	128/16655	6.51333e-05	5733/3156/4780/5578/5467/5328/2152/4846	8
GO:0043393	regulation of protein binding	9/140	169/16655	6.74556e-05	596/581/4318/2932/5465/5595/5599/6714/2641	9
GO:0030804	positive regulation of cyclic nucleotide biosynthetic process	7/140	93/16655	6.88331e-05	5733/4842/4843/19/5578/2641/4846	7
GO:0010829	negative regulation of glucose transport	4/140	18/16655	6.92668e-05	2099/7124/3553/5578	4
GO:0032225	regulation of synaptic transmission, dopaminergic	4/140	18/16655	6.92668e-05	5743/1813/1814/1815	4
GO:0040013	negative regulation of locomotion	11/140	262/16655	6.94319e-05	1588/596/3565/1545/6347/3162/2932/5467/57406/134/1813	11
GO:0046326	positive regulation of glucose import	5/140	37/16655	7.09324e-05	207/4780/1432/3643/3630	5
GO:0010821	regulation of mitochondrion organization	10/140	215/16655	7.16415e-05	207/596/581/4318/7157/841/2932/6721/3091/5599	10
GO:0046822	regulation of nucleocytoplasmic transport	10/140	215/16655	7.16415e-05	5743/3569/7124/3553/142/4792/2932/1432/983/1956	10
GO:0007006	mitochondrial membrane organization	7/140	94/16655	7.302e-05	207/596/581/7157/841/2932/5599	7
GO:1990266	neutrophil migration	7/140	94/16655	7.302e-05	5733/3458/3553/6347/5578/5319/3576	7
GO:0060249	anatomical structure homeostasis	13/140	369/16655	7.32032e-05	3569/596/142/581/231/760/2322/3091/5594/7422/5595/6714/213	13
GO:1902882	regulation of response to oxidative stress	6/140	63/16655	7.44658e-05	7124/207/4780/6648/3091/3630	6
GO:0006875	cellular metal ion homeostasis	15/140	486/16655	7.54281e-05	2099/5733/4842/596/3553/6347/3162/581/5578/5319/3091/3932/1813/1814/1815	15
GO:0034762	regulation of transmembrane transport	14/140	428/16655	7.75418e-05	5733/207/4842/596/3756/6347/581/4318/760/3630/1813/1814/1815/2641	14
GO:0030803	negative regulation of cyclic nucleotide biosynthetic process	5/140	38/16655	7.96595e-05	5733/5578/1813/1814/1815	5
GO:0030811	regulation of nucleotide catabolic process	5/140	38/16655	7.96595e-05	7157/5465/3091/3643/3630	5
GO:0032885	regulation of polysaccharide biosynthetic process	5/140	38/16655	7.96595e-05	207/4790/2932/3643/3630	5
GO:0098801	regulation of renal system process	5/140	38/16655	7.96595e-05	5733/1312/134/1813/1814	5
GO:1903523	negative regulation of blood circulation	5/140	38/16655	7.96595e-05	4842/3156/3091/3630/134	5
GO:0009813	flavonoid biosynthetic process	4/140	19/16655	8.48695e-05	54575/54577/54657/54658	4
GO:0036499	PERK-mediated unfolded protein response	4/140	19/16655	8.48695e-05	5770/6347/4780/3576	4
GO:0070242	thymocyte apoptotic process	4/140	19/16655	8.48695e-05	581/7157/841/3091	4
GO:0098810	neurotransmitter reuptake	4/140	19/16655	8.48695e-05	4842/1813/1814/1815	4
GO:0050769	positive regulation of neurogenesis	13/140	375/16655	8.52306e-05	3569/5970/4137/596/3458/3553/5468/2932/3091/627/7422/152/1813	13
GO:0055074	calcium ion homeostasis	13/140	376/16655	8.75192e-05	2099/5733/4842/596/3553/6347/581/5578/5319/3932/1813/1814/1815	13
GO:0008584	male gonad development	8/140	134/16655	8.75192e-05	2099/3383/596/581/595/2100/3643/8644	8
GO:0046546	development of primary male sexual characteristics	8/140	134/16655	8.75192e-05	2099/3383/596/581/595/2100/3643/8644	8
GO:0002688	regulation of leukocyte chemotaxis	7/140	97/16655	8.75192e-05	1588/3569/3565/3553/6347/3576/7422	7
GO:0042596	fear response	5/140	39/16655	8.93962e-05	3350/596/627/2100/1815	5
GO:0006816	calcium ion transport	13/140	377/16655	8.93962e-05	5743/5733/3383/4842/596/6347/581/5319/3932/1813/1815/2641/4846	13
GO:0002757	immune response-activating signal transduction	15/140	495/16655	9.12093e-05	5970/596/3553/581/3725/4790/4792/841/1432/2353/3932/5594/5595/5599/6714	15
GO:0033157	regulation of intracellular protein transport	13/140	378/16655	9.16695e-05	5743/3569/7124/3553/5770/6347/142/4792/2932/6721/1432/983/1956	13
GO:0009166	nucleotide catabolic process	7/140	98/16655	9.27027e-05	7157/5465/7498/3091/847/3643/3630	7
GO:0030810	positive regulation of nucleotide biosynthetic process	7/140	98/16655	9.27027e-05	5733/4842/4843/19/5578/2641/4846	7
GO:1900373	positive regulation of purine nucleotide biosynthetic process	7/140	98/16655	9.27027e-05	5733/4842/4843/19/5578/2641/4846	7
GO:0043524	negative regulation of neuron apoptotic process	8/140	136/16655	9.63736e-05	596/6347/3162/581/3725/6648/3091/627	8
GO:0044270	cellular nitrogen compound catabolic process	14/140	438/16655	9.71144e-05	1576/836/1565/3162/581/7157/5465/7498/3091/54657/54658/847/3643/3630	14
GO:0044106	cellular amine metabolic process	10/140	224/16655	9.79878e-05	3350/43/4128/1728/5444/5319/1312/590/3630/1815	10
GO:0030809	negative regulation of nucleotide biosynthetic process	5/140	40/16655	9.96912e-05	5733/5578/1813/1814/1815	5
GO:0030815	negative regulation of cAMP metabolic process	5/140	40/16655	9.96912e-05	5733/5578/1813/1814/1815	5
GO:0035924	cellular response to vascular endothelial growth factor stimulus	5/140	40/16655	9.96912e-05	207/1432/7498/2322/7422	5
GO:0051932	synaptic transmission, GABAergic	5/140	40/16655	9.96912e-05	760/627/766/134/1813	5
GO:1900372	negative regulation of purine nucleotide biosynthetic process	5/140	40/16655	9.96912e-05	5733/5578/1813/1814/1815	5
GO:0016125	sterol metabolic process	8/140	137/16655	0.000100537	1588/3156/3565/1545/19/6721/5467/847	8
GO:0045785	positive regulation of cell adhesion	13/140	382/16655	0.000100587	3569/7124/207/3458/3565/3553/6347/2932/5578/3932/246/7422/6714	13
GO:0006636	unsaturated fatty acid biosynthetic process	6/140	67/16655	0.00010154	5743/240/5319/5742/246/8644	6
GO:0010874	regulation of cholesterol efflux	4/140	20/16655	0.000101592	4792/19/5444/6721	4
GO:0033189	response to vitamin A	4/140	20/16655	0.000101592	5468/1543/5467/847	4
GO:0050482	arachidonic acid secretion	4/140	20/16655	0.000101592	5319/1813/1814/1815	4
GO:1903963	arachidonate transport	4/140	20/16655	0.000101592	5319/1813/1814/1815	4
GO:0070661	leukocyte proliferation	11/140	275/16655	0.00010223	836/3569/596/3458/3565/3553/2950/581/7157/2322/196	11
GO:0046683	response to organophosphorus	8/140	138/16655	0.000104845	5743/5970/7299/3553/6347/3725/2353/1017	8
GO:0072503	cellular divalent inorganic cation homeostasis	13/140	384/16655	0.000105109	2099/5733/4842/596/3553/6347/581/5578/5319/3932/1813/1814/1815	13
GO:0030301	cholesterol transport	6/140	68/16655	0.000109136	5468/4790/4792/19/5444/6721	6
GO:0031644	regulation of neurological system process	6/140	68/16655	0.000109136	3569/4842/3458/1312/134/152	6
GO:2000278	regulation of DNA biosynthetic process	6/140	68/16655	0.000109136	5468/7157/2932/5594/5595/6714	6
GO:0006939	smooth muscle contraction	7/140	101/16655	0.000109433	5743/5733/3363/5742/134/152/1813	7
GO:0071887	leukocyte apoptotic process	7/140	101/16655	0.000109433	3569/207/3458/581/7157/841/3091	7
GO:0051972	regulation of telomerase activity	5/140	41/16655	0.000110245	5468/7157/5594/5595/6714	5
GO:0097300	programmed necrotic cell death	5/140	41/16655	0.000110245	7124/581/7157/841/5599	5
GO:0010001	glial cell differentiation	9/140	182/16655	0.000111852	5970/207/3553/2950/5468/983/5594/5595/1814	9
GO:0044242	cellular lipid catabolic process	9/140	182/16655	0.000111852	207/1666/1545/5465/4759/5467/57406/8644/4023	9
GO:0050920	regulation of chemotaxis	9/140	182/16655	0.000111852	1588/3569/3565/3553/6347/5578/3576/7422/2152	9
GO:0001889	liver development	8/140	141/16655	0.000120547	5970/3458/7389/595/3725/1543/54658/5328	8
GO:0002360	T cell lineage commitment	4/140	21/16655	0.000122067	3569/596/3565/7157	4
GO:0031649	heat generation	4/140	21/16655	0.000122067	5743/5733/7124/3553	4
GO:0008630	intrinsic apoptotic signaling pathway in response to DNA damage	7/140	103/16655	0.000122365	7124/596/3162/581/842/7157/5423	7
GO:0030801	positive regulation of cyclic nucleotide metabolic process	7/140	103/16655	0.000122365	5733/4842/4843/19/5578/2641/4846	7
GO:0007520	myoblast fusion	5/140	42/16655	0.000122365	4842/3565/3756/2932/1432	5
GO:0032570	response to progesterone	5/140	42/16655	0.000122365	5733/5970/6347/2353/6714	5
GO:0045744	negative regulation of G-protein coupled receptor protein signaling pathway	5/140	42/16655	0.000122365	5733/4842/3576/1813/1814	5
GO:2000378	negative regulation of reactive oxygen species metabolic process	5/140	42/16655	0.000122365	596/3565/7157/3091/2100	5
GO:2001252	positive regulation of chromosome organization	8/140	142/16655	0.000125368	5925/4842/3553/7157/5594/7422/5595/2641	8
GO:0015918	sterol transport	6/140	70/16655	0.000125943	5468/4790/4792/19/5444/6721	6
GO:2001235	positive regulation of apoptotic signaling pathway	9/140	186/16655	0.000130749	207/596/581/4318/7157/841/2932/3932/5599	9
GO:0033044	regulation of chromosome organization	11/140	284/16655	0.000133088	5925/4842/3553/142/7157/5594/7422/5595/5599/6714/2641	11
GO:0010828	positive regulation of glucose transport	5/140	43/16655	0.000136471	207/4780/1432/3643/3630	5
GO:0030800	negative regulation of cyclic nucleotide metabolic process	5/140	43/16655	0.000136471	5733/5578/1813/1814/1815	5
GO:1901292	nucleoside phosphate catabolic process	7/140	105/16655	0.000137028	7157/5465/7498/3091/847/3643/3630	7
GO:0007188	adenylate cyclase-modulating G-protein coupled receptor signaling pathway	8/140	144/16655	0.000137222	3350/5733/134/152/1813/1814/1815/2641	8
GO:0061008	hepaticobiliary system development	8/140	144/16655	0.000137222	5970/3458/7389/595/3725/1543/54658/5328	8
GO:0006469	negative regulation of protein kinase activity	10/140	235/16655	0.00013927	836/3569/5925/207/3156/3553/5770/2950/2932/5578	10
GO:0043270	positive regulation of ion transport	10/140	235/16655	0.00013927	207/4842/3553/6347/581/5319/134/1813/1815/2641	10
GO:0048565	digestive tract development	8/140	145/16655	0.00014348	7124/5925/596/3274/3576/1543/3091/1956	8
GO:2000045	regulation of G1/S transition of mitotic cell cycle	8/140	145/16655	0.00014348	5925/207/596/595/7157/1543/1956/1017	8
GO:0050803	regulation of synapse structure or activity	10/140	236/16655	0.00014385	5743/4842/2932/3274/3269/627/5594/57406/134/1813	10
GO:0014902	myotube differentiation	7/140	106/16655	0.000143891	4842/596/3565/3756/2932/1432/4759	7
GO:0032148	activation of protein kinase B activity	4/140	22/16655	0.000143891	3643/6714/3630/152	4
GO:0051000	positive regulation of nitric-oxide synthase activity	4/140	22/16655	0.000143891	2099/207/3091/3630	4
GO:0007548	sex differentiation	11/140	287/16655	0.000143937	2099/3383/596/581/595/7422/196/2100/3643/8644/4846	11
GO:0042063	gliogenesis	10/140	237/16655	0.000148179	5970/207/3553/6347/2950/5468/983/5594/5595/1814	10
GO:0032881	regulation of polysaccharide metabolic process	5/140	44/16655	0.000149091	207/4790/2932/3643/3630	5
GO:0038083	peptidyl-tyrosine autophosphorylation	5/140	44/16655	0.000149091	3932/7422/3643/5595/6714	5
GO:0043470	regulation of carbohydrate catabolic process	5/140	44/16655	0.000149091	7157/5465/3091/3643/3630	5
GO:0043471	regulation of cellular carbohydrate catabolic process	5/140	44/16655	0.000149091	7157/5465/3091/3643/3630	5
GO:0045123	cellular extravasation	5/140	44/16655	0.000149091	5733/7124/3383/6401/6347	5
GO:0050433	regulation of catecholamine secretion	5/140	44/16655	0.000149091	5733/5742/152/1813/1814	5
GO:0051602	response to electrical stimulus	5/140	44/16655	0.000149091	3569/7054/3091/6714/1017	5
GO:0042113	B cell activation	10/140	238/16655	0.000152042	836/3569/596/3458/3565/581/7157/841/2322/196	10
GO:0043407	negative regulation of MAP kinase activity	6/140	73/16655	0.000154956	3156/3553/5770/2950/2932/5578	6
GO:0006633	fatty acid biosynthetic process	8/140	147/16655	0.000155123	5743/240/2194/5319/5742/246/8644/4023	8
GO:0006909	phagocytosis	10/140	239/16655	0.000156967	7124/3553/6347/5468/19/246/5594/5595/6714/134	10
GO:0030817	regulation of cAMP biosynthetic process	7/140	108/16655	0.000159468	5733/19/5578/1813/1814/1815/2641	7
GO:0035270	endocrine system development	8/140	148/16655	0.000162229	3569/207/2932/5594/3643/5595/3630/1813	8
GO:0072507	divalent inorganic cation homeostasis	13/140	403/16655	0.000162383	2099/5733/4842/596/3553/6347/581/5578/5319/3932/1813/1814/1815	13
GO:0036003	positive regulation of transcription from RNA polymerase II promoter in response to stress	4/140	23/16655	0.000169181	4780/7157/3091/7422	4
GO:0043536	positive regulation of blood vessel endothelial cell migration	4/140	23/16655	0.000169181	5743/207/5578/7422	4
GO:0009152	purine ribonucleotide biosynthetic process	10/140	243/16655	0.000179345	5733/4842/4843/19/5578/1813/1814/1815/2641/4846	10
GO:0010660	regulation of muscle cell apoptotic process	5/140	46/16655	0.000182453	3156/3458/3162/7157/2932	5
GO:0042743	hydrogen peroxide metabolic process	5/140	46/16655	0.000182453	1544/4353/1543/847/3643	5
GO:1903201	regulation of oxidative stress-induced cell death	5/140	46/16655	0.000182453	207/4780/6648/3091/3630	5
GO:2001239	regulation of extrinsic apoptotic signaling pathway in absence of ligand	5/140	46/16655	0.000182453	7124/207/596/3553/581	5
GO:0002703	regulation of leukocyte mediated immunity	8/140	151/16655	0.000185155	7124/3383/4843/3458/3565/3553/6347/3162	8
GO:0007631	feeding behavior	7/140	111/16655	0.000187649	7054/2353/627/2100/3630/1813/2641	7
GO:0044275	cellular carbohydrate catabolic process	6/140	76/16655	0.000191343	7157/5465/3091/3643/3630/8972	6
GO:0010720	positive regulation of cell development	14/140	471/16655	0.000194385	3569/5970/4137/596/3458/3553/581/5468/2932/3091/627/7422/152/1813	14
GO:0002544	chronic inflammatory response	4/140	24/16655	0.000197765	1588/7124/3565/3553	4
GO:0007194	negative regulation of adenylate cyclase activity	4/140	24/16655	0.000197765	5578/1813/1814/1815	4
GO:0030728	ovulation	4/140	24/16655	0.000197765	5743/3553/5328/4846	4
GO:0035812	renal sodium excretion	4/140	24/16655	0.000197765	1312/134/1813/1814	4
GO:0035813	regulation of renal sodium excretion	4/140	24/16655	0.000197765	1312/134/1813/1814	4
GO:0045672	positive regulation of osteoclast differentiation	4/140	24/16655	0.000197765	7124/3458/2353/760	4
GO:1902932	positive regulation of alcohol biosynthetic process	4/140	24/16655	0.000197765	7124/3458/3553/3269	4
GO:0022409	positive regulation of cell-cell adhesion	10/140	247/16655	0.000201864	3569/7124/207/3458/3565/3553/6347/3932/246/6714	10
GO:1902806	regulation of cell cycle G1/S phase transition	8/140	154/16655	0.00020988	5925/207/596/595/7157/1543/1956/1017	8
GO:0006898	receptor-mediated endocytosis	11/140	301/16655	0.000212049	43/5733/6401/3576/5594/7422/5595/6714/213/1813/1814	11
GO:0048638	regulation of developmental growth	11/140	301/16655	0.000212049	4137/596/2932/1432/5467/627/983/7422/3643/1813/1814	11
GO:0006164	purine nucleotide biosynthetic process	10/140	249/16655	0.00021501	5733/4842/4843/19/5578/1813/1814/1815/2641/4846	10
GO:0042058	regulation of epidermal growth factor receptor signaling pathway	6/140	78/16655	0.00021772	2099/4318/1956/2100/134/152	6
GO:2000177	regulation of neural precursor cell proliferation	6/140	78/16655	0.00021772	3553/7157/3091/627/7422/1813	6
GO:0050432	catecholamine secretion	5/140	48/16655	0.00021971	5733/5742/152/1813/1814	5
GO:0002699	positive regulation of immune effector process	8/140	156/16655	0.000228069	3569/7124/4843/3458/3565/3553/6347/3162	8
GO:0045807	positive regulation of endocytosis	7/140	115/16655	0.00022976	7124/3553/6401/6347/5468/7422/1813	7
GO:0051592	response to calcium ion	7/140	115/16655	0.00022976	3569/3756/595/3725/2353/246/8644	7
GO:0001504	neurotransmitter uptake	4/140	25/16655	0.000230257	4842/1813/1814/1815	4
GO:0050927	positive regulation of positive chemotaxis	4/140	25/16655	0.000230257	5578/3576/7422/2152	4
GO:0031058	positive regulation of histone modification	6/140	79/16655	0.000232039	4842/3553/7157/7422/5595/2641	6
GO:0033673	negative regulation of kinase activity	10/140	252/16655	0.000234937	836/3569/5925/207/3156/3553/5770/2950/2932/5578	10
GO:0014910	regulation of smooth muscle cell migration	5/140	49/16655	0.000240138	596/5467/5328/6714/2152	5
GO:0070231	T cell apoptotic process	5/140	49/16655	0.000240138	207/581/7157/841/3091	5
GO:0070265	necrotic cell death	5/140	49/16655	0.000240138	7124/581/7157/841/5599	5
GO:0003014	renal system process	7/140	116/16655	0.000240506	5733/596/1312/8644/134/1813/1814	7
GO:0048015	phosphatidylinositol-mediated signaling	9/140	204/16655	0.000247064	207/842/2932/2322/3932/5467/847/1956/3630	9
GO:0034766	negative regulation of ion transmembrane transport	6/140	80/16655	0.000247064	5733/207/4318/1813/1814/1815	6
GO:0070838	divalent metal ion transport	13/140	423/16655	0.000254044	5743/5733/3383/4842/596/6347/581/5319/3932/1813/1815/2641/4846	13
GO:0043010	camera-type eye development	11/140	308/16655	0.000255017	43/7054/3565/1545/581/3725/1543/3091/7422/1017/1815	11
GO:0046661	male sex differentiation	8/140	159/16655	0.00025635	2099/3383/596/581/595/2100/3643/8644	8
GO:0071277	cellular response to calcium ion	5/140	50/16655	0.000262199	3756/3725/2353/246/8644	5
GO:0071398	cellular response to fatty acid	5/140	50/16655	0.000262199	207/3553/5468/6714/8644	5
GO:0002028	regulation of sodium ion transport	6/140	81/16655	0.000262199	207/4842/1813/1814/1815/4846	6
GO:0002690	positive regulation of leukocyte chemotaxis	6/140	81/16655	0.000262199	3569/3565/3553/6347/3576/7422	6
GO:0043500	muscle adaptation	6/140	81/16655	0.000262199	3553/3162/142/2932/5578/4846	6
GO:1901184	regulation of ERBB signaling pathway	6/140	81/16655	0.000262199	2099/4318/1956/2100/134/152	6
GO:0009260	ribonucleotide biosynthetic process	10/140	256/16655	0.000263039	5733/4842/4843/19/5578/1813/1814/1815/2641/4846	10
GO:0010575	positive regulation of vascular endothelial growth factor production	4/140	26/16655	0.000263404	5743/3553/1545/3091	4
GO:0031280	negative regulation of cyclase activity	4/140	26/16655	0.000263404	5578/1813/1814/1815	4
GO:0050926	regulation of positive chemotaxis	4/140	26/16655	0.000263404	5578/3576/7422/2152	4
GO:0071354	cellular response to interleukin-6	4/140	26/16655	0.000263404	3569/5970/6347/4790	4
GO:0043900	regulation of multi-organism process	14/140	487/16655	0.000264592	7124/7153/4843/596/3458/3565/4353/3725/5578/3576/3932/5328/766/1815	14
GO:0072511	divalent inorganic cation transport	13/140	426/16655	0.000268175	5743/5733/3383/4842/596/6347/581/5319/3932/1813/1815/2641/4846	13
GO:0048017	inositol lipid-mediated signaling	9/140	207/16655	0.000271035	207/842/2932/2322/3932/5467/847/1956/3630	9
GO:0006171	cAMP biosynthetic process	7/140	119/16655	0.000276387	5733/19/5578/1813/1814/1815/2641	7
GO:0045445	myoblast differentiation	6/140	82/16655	0.000277377	7124/5925/3156/1432/4759/5467	6
GO:1903310	positive regulation of chromatin modification	6/140	82/16655	0.000277377	4842/3553/7157/7422/5595/2641	6
GO:0034110	regulation of homotypic cell-cell adhesion	11/140	312/16655	0.000280021	836/3569/5733/207/3458/3565/3553/6347/5578/3932/6714	11
GO:0009118	regulation of nucleoside metabolic process	5/140	51/16655	0.000282113	7157/5465/3091/3643/3630	5
GO:0010657	muscle cell apoptotic process	5/140	51/16655	0.000282113	3156/3458/3162/7157/2932	5
GO:0051193	regulation of cofactor metabolic process	5/140	51/16655	0.000282113	7157/5465/3091/3643/3630	5
GO:0051196	regulation of coenzyme metabolic process	5/140	51/16655	0.000282113	7157/5465/3091/3643/3630	5
GO:1903578	regulation of ATP metabolic process	5/140	51/16655	0.000282113	7157/5465/3091/3643/3630	5
GO:0046390	ribose phosphate biosynthetic process	10/140	259/16655	0.00028392	5733/4842/4843/19/5578/1813/1814/1815/2641/4846	10
GO:0071356	cellular response to tumor necrosis factor	10/140	259/16655	0.00028392	3569/5970/7124/3383/6347/2950/4780/4790/841/3576	10
GO:0007249	I-kappaB kinase/NF-kappaB signaling	10/140	260/16655	0.000292515	5743/2099/5970/7124/3553/2950/3162/4790/4792/841	10
GO:0046651	lymphocyte proliferation	10/140	260/16655	0.000292515	836/3569/596/3458/3565/3553/581/7157/2322/196	10
GO:0048147	negative regulation of fibroblast proliferation	4/140	27/16655	0.000301221	2950/581/5468/7157	4
GO:0050777	negative regulation of immune response	7/140	121/16655	0.000301612	7124/3565/3162/5468/246/3630/1813	7
GO:0055067	monovalent inorganic cation homeostasis	7/140	121/16655	0.000301612	596/760/766/1312/134/1813/1814	7
GO:0071333	cellular response to glucose stimulus	7/140	121/16655	0.000301612	7054/3383/3156/3553/3091/5328/2641	7
GO:0000768	syncytium formation by plasma membrane fusion	5/140	52/16655	0.0003065	4842/3565/3756/2932/1432	5
GO:0050810	regulation of steroid biosynthetic process	5/140	52/16655	0.0003065	7124/3458/3553/4790/8644	5
GO:0072522	purine-containing compound biosynthetic process	10/140	262/16655	0.000309298	5733/4842/4843/19/5578/1813/1814/1815/2641/4846	10
GO:0006352	DNA-templated transcription, initiation	11/140	317/16655	0.000316551	2099/207/142/5468/3725/7157/5465/5467/196/2100/5595	11
GO:0072330	monocarboxylic acid biosynthetic process	9/140	212/16655	0.000317551	5743/240/2194/5319/5742/1543/246/8644/4023	9
GO:0032943	mononuclear cell proliferation	10/140	263/16655	0.000318163	836/3569/596/3458/3565/3553/581/7157/2322/196	10
GO:0051962	positive regulation of nervous system development	13/140	436/16655	0.000329448	3569/5970/4137/596/3458/3553/5468/2932/3091/627/7422/152/1813	13
GO:0071331	cellular response to hexose stimulus	7/140	123/16655	0.000331562	7054/3383/3156/3553/3091/5328/2641	7
GO:0046700	heterocycle catabolic process	13/140	438/16655	0.000342472	836/3162/581/7157/5465/7498/1543/3091/54657/54658/847/3643/3630	13
GO:0030947	regulation of vascular endothelial growth factor receptor signaling pathway	4/140	28/16655	0.000342472	3553/5770/3091/7422	4
GO:0033598	mammary gland epithelial cell proliferation	4/140	28/16655	0.000342472	2099/581/595/5594	4
GO:0046688	response to copper ion	4/140	28/16655	0.000342472	3383/581/4790/983	4
GO:0051350	negative regulation of lyase activity	4/140	28/16655	0.000342472	5578/1813/1814/1815	4
GO:1901522	positive regulation of transcription from RNA polymerase II promoter involved in cellular response to chemical stimulus	4/140	28/16655	0.000342472	4780/7157/3091/7422	4
GO:0071326	cellular response to monosaccharide stimulus	7/140	124/16655	0.00034622	7054/3383/3156/3553/3091/5328/2641	7
GO:0001763	morphogenesis of a branching structure	9/140	215/16655	0.000348976	2099/3569/7124/596/3553/581/7422/6714/1813	9
GO:0002705	positive regulation of leukocyte mediated immunity	6/140	86/16655	0.000348976	7124/4843/3458/3565/3553/6347	6
GO:0030193	regulation of blood coagulation	6/140	86/16655	0.000348976	5733/4780/5578/5328/2152/4846	6
GO:1900046	regulation of hemostasis	6/140	86/16655	0.000348976	5733/4780/5578/5328/2152/4846	6
GO:0030814	regulation of cAMP metabolic process	7/140	125/16655	0.000361376	5733/19/5578/1813/1814/1815/2641	7
GO:0030856	regulation of epithelial cell differentiation	7/140	125/16655	0.000361376	7124/596/3458/3553/595/2932/7498	7
GO:0050864	regulation of B cell activation	7/140	125/16655	0.000361376	836/3569/596/3458/3565/2322/196	7
GO:1901990	regulation of mitotic cell cycle phase transition	10/140	268/16655	0.000364884	5925/207/596/332/595/7157/1543/983/1956/1017	10
GO:0016485	protein processing	11/140	323/16655	0.000365712	836/7124/142/581/842/5468/332/841/7498/3932/2152	11
GO:0002676	regulation of chronic inflammatory response	3/140	11/16655	0.000366107	1588/7124/3565	3
GO:0009414	response to water deprivation	3/140	11/16655	0.000366107	7054/231/2100	3
GO:0010713	negative regulation of collagen metabolic process	3/140	11/16655	0.000366107	3569/5468/5467	3
GO:0031284	positive regulation of guanylate cyclase activity	3/140	11/16655	0.000366107	4842/4843/4846	3
GO:0051583	dopamine uptake involved in synaptic transmission	3/140	11/16655	0.000366107	1813/1814/1815	3
GO:0051934	catecholamine uptake involved in synaptic transmission	3/140	11/16655	0.000366107	1813/1814/1815	3
GO:0090493	catecholamine uptake	3/140	11/16655	0.000366107	1813/1814/1815	3
GO:0090494	dopamine uptake	3/140	11/16655	0.000366107	1813/1814/1815	3
GO:0030593	neutrophil chemotaxis	6/140	87/16655	0.000366528	3458/3553/6347/5578/5319/3576	6
GO:0071901	negative regulation of protein serine/threonine kinase activity	7/140	126/16655	0.000374558	836/3156/3553/5770/2950/2932/5578	7
GO:1902652	secondary alcohol metabolic process	7/140	126/16655	0.000374558	1576/3156/3565/19/6721/5467/847	7
GO:0010831	positive regulation of myotube differentiation	4/140	29/16655	0.000384322	596/3565/1432/4759	4
GO:0030823	regulation of cGMP metabolic process	4/140	29/16655	0.000384322	4842/4843/7422/4846	4
GO:0042168	heme metabolic process	4/140	29/16655	0.000384322	7389/3162/54657/54658	4
GO:0014909	smooth muscle cell migration	5/140	55/16655	0.000384956	596/5467/5328/6714/2152	5
GO:0033619	membrane protein proteolysis	5/140	55/16655	0.000384956	5970/7124/3458/3553/4790	5
GO:0042531	positive regulation of tyrosine phosphorylation of STAT protein	5/140	55/16655	0.000384956	3569/3458/3565/2322/3932	5
GO:0034763	negative regulation of transmembrane transport	6/140	88/16655	0.000386826	5733/207/4318/1813/1814/1815	6
GO:0030968	endoplasmic reticulum unfolded protein response	7/140	128/16655	0.0004095	3458/5770/6347/4780/581/595/3576	7
GO:0031056	regulation of histone modification	7/140	128/16655	0.0004095	4842/3553/7157/7422/5595/5599/2641	7
GO:0006949	syncytium formation	5/140	56/16655	0.000417586	4842/3565/3756/2932/1432	5
GO:0035272	exocrine system development	5/140	56/16655	0.000417586	3569/7124/5423/1956/3643	5
GO:0001655	urogenital system development	11/140	329/16655	0.000419696	1588/2099/596/581/231/760/627/847/7422/196/2100	11
GO:0050818	regulation of coagulation	6/140	90/16655	0.000432523	5733/4780/5578/5328/2152/4846	6
GO:0051101	regulation of DNA binding	6/140	90/16655	0.000432523	3162/142/3725/4318/4792/5465	6
GO:0001782	B cell homeostasis	4/140	30/16655	0.000432523	836/596/581/3091	4
GO:0005979	regulation of glycogen biosynthetic process	4/140	30/16655	0.000432523	207/2932/3643/3630	4
GO:0008209	androgen metabolic process	4/140	30/16655	0.000432523	1576/1588/2099/8644	4
GO:0010962	regulation of glucan biosynthetic process	4/140	30/16655	0.000432523	207/2932/3643/3630	4
GO:0014911	positive regulation of smooth muscle cell migration	4/140	30/16655	0.000432523	596/5328/6714/2152	4
GO:0070741	response to interleukin-6	4/140	30/16655	0.000432523	3569/5970/6347/4790	4
GO:0007405	neuroblast proliferation	5/140	57/16655	0.000449791	7157/3091/627/7422/1813	5
GO:0034620	cellular response to unfolded protein	7/140	131/16655	0.000466891	3458/5770/6347/4780/581/595/3576	7
GO:0010889	regulation of sequestering of triglyceride	3/140	12/16655	0.000469623	5468/5465/4023	3
GO:0017085	response to insecticide	3/140	12/16655	0.000469623	7054/1543/2100	3
GO:0044252	negative regulation of multicellular organismal metabolic process	3/140	12/16655	0.000469623	3569/5468/5467	3
GO:0080184	response to phenylpropanoid	3/140	12/16655	0.000469623	3553/847/2100	3
GO:0090335	regulation of brown fat cell differentiation	3/140	12/16655	0.000469623	5743/1432/3630	3
GO:0042176	regulation of protein catabolic process	12/140	394/16655	0.000482329	5970/7124/5925/207/4843/3458/3553/4780/2932/983/1956/3630	12
GO:0001505	regulation of neurotransmitter levels	8/140	177/16655	0.000486581	43/7054/4842/4128/1312/1813/1814/1815	8
GO:0002026	regulation of the force of heart contraction	4/140	31/16655	0.000486581	4842/3458/5578/4846	4
GO:0014072	response to isoquinoline alkaloid	4/140	31/16655	0.000486581	5970/3553/1813/1814	4
GO:0043278	response to morphine	4/140	31/16655	0.000486581	5970/3553/1813/1814	4
GO:0046627	negative regulation of insulin receptor signaling pathway	4/140	31/16655	0.000486581	5970/3553/5770/5578	4
GO:0008286	insulin receptor signaling pathway	11/140	336/16655	0.000493386	5970/207/3553/5770/5578/5594/1956/3643/5595/6714/3630	11
GO:0044344	cellular response to fibroblast growth factor stimulus	11/140	337/16655	0.000505882	207/6347/842/2932/5578/3576/3932/5594/1956/5595/6714	11
GO:0002793	positive regulation of peptide secretion	6/140	93/16655	0.00050963	3091/5467/3630/134/1813/2641	6
GO:0002694	regulation of leukocyte activation	13/140	459/16655	0.000512633	836/3569/207/596/3458/3565/3553/6347/3162/2322/3932/196/6714	13
GO:0031341	regulation of cell killing	5/140	59/16655	0.000520561	3383/4843/3458/3565/6347	5
GO:1904035	regulation of epithelial cell apoptotic process	5/140	59/16655	0.000520561	3569/3383/3565/4780/8644	5
GO:0006112	energy reserve metabolic process	8/140	179/16655	0.000521163	207/2194/2932/5578/3643/3630/152/2641	8
GO:0001678	cellular glucose homeostasis	7/140	134/16655	0.00052649	7054/3383/3156/3553/3091/5328/2641	7
GO:0008277	regulation of G-protein coupled receptor protein signaling pathway	7/140	134/16655	0.00052649	5733/4842/5578/3576/57406/1813/1814	7
GO:0019395	fatty acid oxidation	6/140	94/16655	0.000536689	207/1666/5468/1432/5465/5467	6
GO:0051259	protein oligomerization	13/140	462/16655	0.000542719	43/1666/3156/3162/581/7157/841/4312/6648/847/3643/6714/3630	13
GO:0001893	maternal placenta development	4/140	32/16655	0.000543273	5743/2099/207/5467	4
GO:0002686	negative regulation of leukocyte migration	4/140	32/16655	0.000543273	1588/6347/3162/134	4
GO:0010165	response to X-ray	4/140	32/16655	0.000543273	836/595/7157/3091	4
GO:1901099	negative regulation of signal transduction in absence of ligand	4/140	32/16655	0.000543273	7124/207/596/3553	4
GO:2001240	negative regulation of extrinsic apoptotic signaling pathway in absence of ligand	4/140	32/16655	0.000543273	7124/207/596/3553	4
GO:0045685	regulation of glial cell differentiation	5/140	60/16655	0.000557622	5970/3553/5468/983/1814	5
GO:0051262	protein tetramerization	7/140	136/16655	0.000571928	43/1666/3156/7157/6648/847/3643	7
GO:0071774	response to fibroblast growth factor	11/140	343/16655	0.000579883	207/6347/842/2932/5578/3576/3932/5594/1956/5595/6714	11
GO:0051249	regulation of lymphocyte activation	12/140	403/16655	0.000579984	836/3569/207/596/3458/3565/3553/6347/2322/3932/196/6714	12
GO:0002693	positive regulation of cellular extravasation	3/140	13/16655	0.000587951	5733/3383/6347	3
GO:0019372	lipoxygenase pathway	3/140	13/16655	0.000587951	5743/240/246	3
GO:0031282	regulation of guanylate cyclase activity	3/140	13/16655	0.000587951	4842/4843/4846	3
GO:0045651	positive regulation of macrophage differentiation	3/140	13/16655	0.000587951	5925/841/5578	3
GO:0043122	regulation of I-kappaB kinase/NF-kappaB signaling	9/140	233/16655	0.000591609	5743/2099/5970/7124/3553/2950/3162/4792/841	9
GO:0034440	lipid oxidation	6/140	96/16655	0.000592793	207/1666/5468/1432/5465/5467	6
GO:0002429	immune response-activating cell surface receptor signaling pathway	11/140	345/16655	0.000604996	5970/596/3553/581/4790/4792/841/3932/5594/5595/6714	11
GO:0032965	regulation of collagen biosynthetic process	4/140	33/16655	0.000605366	3569/6347/5468/5467	4
GO:0061418	regulation of transcription from RNA polymerase II promoter in response to hypoxia	4/140	33/16655	0.000605366	7157/768/3091/7422	4
GO:1900077	negative regulation of cellular response to insulin stimulus	4/140	33/16655	0.000605366	5970/3553/5770/5578	4
GO:0006733	oxidoreduction coenzyme metabolic process	7/140	138/16655	0.000617816	5743/3156/7157/5465/3091/3643/3630	7
GO:1901987	regulation of cell cycle phase transition	10/140	289/16655	0.000623452	5925/207/596/332/595/7157/1543/983/1956/1017	10
GO:0051604	protein maturation	11/140	347/16655	0.000632292	836/7124/142/581/842/5468/332/841/7498/3932/2152	11
GO:2000027	regulation of organ morphogenesis	8/140	185/16655	0.000635838	2099/7124/596/3458/581/627/5328/7422	8
GO:1904063	negative regulation of cation transmembrane transport	5/140	62/16655	0.000639883	5733/4318/1813/1814/1815	5
GO:0001959	regulation of cytokine-mediated signaling pathway	7/140	139/16655	0.000642776	7124/3458/5770/2950/5468/841/3091	7
GO:0035967	cellular response to topologically incorrect protein	7/140	140/16655	0.000671235	3458/5770/6347/4780/581/595/3576	7
GO:0006691	leukotriene metabolic process	4/140	34/16655	0.000676075	4363/240/5319/246	4
GO:0044282	small molecule catabolic process	11/140	350/16655	0.000677195	207/1666/4842/4843/7157/5444/5465/1543/5467/8644/4846	11
GO:0006940	regulation of smooth muscle contraction	5/140	63/16655	0.000686184	5743/5733/5742/134/152	5
GO:0045670	regulation of osteoclast differentiation	5/140	63/16655	0.000686184	7124/3458/3565/2353/760	5
GO:0046425	regulation of JAK-STAT cascade	7/140	141/16655	0.000697144	3569/3458/3565/1545/231/2322/3932	7
GO:1904892	regulation of STAT cascade	7/140	141/16655	0.000697144	3569/3458/3565/1545/231/2322/3932	7
GO:0045926	negative regulation of growth	9/140	239/16655	0.00070195	7124/596/3458/4353/5468/7157/3091/5467/2100	9
GO:1903308	regulation of chromatin modification	7/140	142/16655	0.000722069	4842/3553/7157/7422/5595/5599/2641	7
GO:0010875	positive regulation of cholesterol efflux	3/140	14/16655	0.000722069	4792/19/5444	3
GO:0010893	positive regulation of steroid biosynthetic process	3/140	14/16655	0.000722069	7124/3458/3553	3
GO:0019371	cyclooxygenase pathway	3/140	14/16655	0.000722069	5743/5742/8644	3
GO:0034616	response to laminar fluid shear stress	3/140	14/16655	0.000722069	4780/19/6721	3
GO:0045821	positive regulation of glycolytic process	3/140	14/16655	0.000722069	3091/3643/3630	3
GO:0048313	Golgi inheritance	3/140	14/16655	0.000722069	983/5594/5595	3
GO:0070243	regulation of thymocyte apoptotic process	3/140	14/16655	0.000722069	7157/841/3091	3
GO:0071801	regulation of podosome assembly	3/140	14/16655	0.000722069	7124/5599/6714	3
GO:0032410	negative regulation of transporter activity	5/140	64/16655	0.000728989	4318/3643/1813/1814/1815	5
GO:0042509	regulation of tyrosine phosphorylation of STAT protein	5/140	64/16655	0.000728989	3569/3458/3565/2322/3932	5
GO:0045737	positive regulation of cyclin-dependent protein serine/threonine kinase activity	4/140	35/16655	0.000744707	207/595/1956/6714	4
GO:0016052	carbohydrate catabolic process	7/140	144/16655	0.000781321	7157/5465/3091/4759/3643/3630/8972	7
GO:0002697	regulation of immune effector process	12/140	418/16655	0.000781321	3569/7124/3383/4843/3458/3565/3553/6347/3162/3932/766/3630	12
GO:0048678	response to axon injury	5/140	65/16655	0.000781321	596/581/3725/983/1813	5
GO:0007204	positive regulation of cytosolic calcium ion concentration	9/140	243/16655	0.000781707	2099/5733/4842/596/3553/581/5319/3932/1813	9
GO:0043409	negative regulation of MAPK cascade	7/140	145/16655	0.000812558	207/3156/3553/5770/2950/2932/5578	7
GO:0060759	regulation of response to cytokine stimulus	7/140	145/16655	0.000812558	7124/3458/5770/2950/5468/841/3091	7
GO:0002251	organ or tissue specific immune response	4/140	36/16655	0.000823304	3569/4843/3565/5319	4
GO:0007435	salivary gland morphogenesis	4/140	36/16655	0.000823304	3569/7124/5423/1956	4
GO:0051930	regulation of sensory perception of pain	4/140	36/16655	0.000823304	4842/1312/134/152	4
GO:0051931	regulation of sensory perception	4/140	36/16655	0.000823304	4842/1312/134/152	4
GO:0070873	regulation of glycogen metabolic process	4/140	36/16655	0.000823304	207/2932/3643/3630	4
GO:0000075	cell cycle checkpoint	9/140	245/16655	0.000824219	5925/207/7153/332/595/7157/1432/983/1017	9
GO:0002260	lymphocyte homeostasis	5/140	66/16655	0.000830595	836/207/596/581/3091	5
GO:0014812	muscle cell migration	5/140	66/16655	0.000830595	596/5467/5328/6714/2152	5
GO:0034101	erythrocyte homeostasis	6/140	103/16655	0.000832819	836/5925/3162/1432/3091/7422	6
GO:0030534	adult behavior	7/140	146/16655	0.000839228	4137/4842/142/5465/1813/1814/1815	7
GO:0030307	positive regulation of cell growth	7/140	147/16655	0.000864941	4137/207/596/2932/627/7422/3630	7
GO:1903037	regulation of leukocyte cell-cell adhesion	10/140	303/16655	0.000864941	836/3569/207/3458/3565/3553/6347/5465/3932/6714	10
GO:0002031	G-protein coupled receptor internalization	3/140	15/16655	0.000864941	5733/1813/1814	3
GO:0002363	alpha-beta T cell lineage commitment	3/140	15/16655	0.000864941	3569/596/3565	3
GO:0010155	regulation of proton transport	3/140	15/16655	0.000864941	3565/1814/1815	3
GO:0010661	positive regulation of muscle cell apoptotic process	3/140	15/16655	0.000864941	3156/3458/7157	3
GO:0032075	positive regulation of nuclease activity	3/140	15/16655	0.000864941	207/5770/581	3
GO:0032495	response to muramyl dipeptide	3/140	15/16655	0.000864941	5970/4792/1432	3
GO:0045725	positive regulation of glycogen biosynthetic process	3/140	15/16655	0.000864941	207/3643/3630	3
GO:0046325	negative regulation of glucose import	3/140	15/16655	0.000864941	2099/7124/5578	3
GO:0048308	organelle inheritance	3/140	15/16655	0.000864941	983/5594/5595	3
GO:0050930	induction of positive chemotaxis	3/140	15/16655	0.000864941	5578/3576/7422	3
GO:0051044	positive regulation of membrane protein ectodomain proteolysis	3/140	15/16655	0.000864941	7124/3458/3553	3
GO:0051194	positive regulation of cofactor metabolic process	3/140	15/16655	0.000864941	3091/3643/3630	3
GO:0051197	positive regulation of coenzyme metabolic process	3/140	15/16655	0.000864941	3091/3643/3630	3
GO:0051974	negative regulation of telomerase activity	3/140	15/16655	0.000864941	5468/7157/6714	3
GO:0071276	cellular response to cadmium ion	3/140	15/16655	0.000864941	1544/3162/8644	3
GO:0071675	regulation of mononuclear cell migration	3/140	15/16655	0.000864941	7124/3565/6347	3
GO:0006921	cellular component disassembly involved in execution phase of apoptosis	5/140	67/16655	0.000872637	836/4137/7153/581/841	5
GO:0070988	demethylation	5/140	67/16655	0.000872637	1576/1559/1544/1565/1543	5
GO:0090150	establishment of protein localization to membrane	11/140	363/16655	0.000879095	7124/207/596/3458/6347/581/7157/841/1956/5599/134	11
GO:0000082	G1/S transition of mitotic cell cycle	9/140	248/16655	0.000879409	5925/207/596/595/7157/1543/983/1956/1017	9
GO:0006937	regulation of muscle contraction	7/140	148/16655	0.000889827	5743/5733/4842/5578/5742/134/152	7
GO:0002532	production of molecular mediator involved in inflammatory response	4/140	37/16655	0.000889827	4843/240/1432/3630	4
GO:0031952	regulation of protein autophosphorylation	4/140	37/16655	0.000889827	3725/7422/6714/3630	4
GO:1904031	positive regulation of cyclin-dependent protein kinase activity	4/140	37/16655	0.000889827	207/595/1956/6714	4
GO:0009165	nucleotide biosynthetic process	10/140	305/16655	0.000900188	5733/4842/4843/19/5578/1813/1814/1815/2641/4846	10
GO:0046058	cAMP metabolic process	7/140	149/16655	0.000923996	5733/19/5578/1813/1814/1815/2641	7
GO:1902275	regulation of chromatin organization	7/140	149/16655	0.000923996	4842/3553/7157/7422/5595/5599/2641	7
GO:0006096	glycolytic process	5/140	68/16655	0.000923996	7157/5465/3091/3643/3630	5
GO:0006970	response to osmotic stress	5/140	68/16655	0.000923996	7124/7054/581/7157/3091	5
GO:0007193	adenylate cyclase-inhibiting G-protein coupled receptor signaling pathway	5/140	68/16655	0.000923996	3350/134/1813/1814/1815	5
GO:0050764	regulation of phagocytosis	5/140	68/16655	0.000923996	7124/3553/6347/5468/246	5
GO:0048771	tissue remodeling	7/140	150/16655	0.000958086	3569/581/7157/760/3091/6714/4846	7
GO:0006111	regulation of gluconeogenesis	4/140	38/16655	0.000976815	3569/5465/3630/2641	4
GO:0010712	regulation of collagen metabolic process	4/140	38/16655	0.000976815	3569/6347/5468/5467	4
GO:0030857	negative regulation of epithelial cell differentiation	4/140	38/16655	0.000976815	3458/595/2932/7498	4
GO:0033280	response to vitamin D	4/140	38/16655	0.000976815	5743/7299/3553/3643	4
GO:0006757	ATP generation from ADP	5/140	69/16655	0.000982958	7157/5465/3091/3643/3630	5
GO:0007260	tyrosine phosphorylation of STAT protein	5/140	69/16655	0.000982958	3569/3458/3565/2322/3932	5
GO:0007292	female gamete generation	6/140	107/16655	0.000983487	5743/596/3553/5328/6714/4846	6
GO:1901293	nucleoside phosphate biosynthetic process	10/140	310/16655	0.00101021	5733/4842/4843/19/5578/1813/1814/1815/2641/4846	10
GO:0016137	glycoside metabolic process	3/140	16/16655	0.00102817	7054/231/8644	3
GO:0030949	positive regulation of vascular endothelial growth factor receptor signaling pathway	3/140	16/16655	0.00102817	3553/3091/7422	3
GO:0043369	CD4-positive or CD8-positive, alpha-beta T cell lineage commitment	3/140	16/16655	0.00102817	3569/596/3565	3
GO:0044130	negative regulation of growth of symbiont in host	3/140	16/16655	0.00102817	7124/3458/4353	3
GO:0071674	mononuclear cell migration	3/140	16/16655	0.00102817	7124/3565/6347	3
GO:2000641	regulation of early endosome to late endosome transport	3/140	16/16655	0.00102817	5594/5595/6714	3
GO:0070227	lymphocyte apoptotic process	5/140	70/16655	0.0010426	207/581/7157/841/3091	5
GO:0071897	DNA biosynthetic process	7/140	153/16655	0.00106468	5468/7157/2932/5423/5594/5595/6714	7
GO:0032964	collagen biosynthetic process	4/140	39/16655	0.00106622	3569/6347/5468/5467	4
GO:0044246	regulation of multicellular organismal metabolic process	4/140	39/16655	0.00106622	3569/6347/5468/5467	4
GO:0050873	brown fat cell differentiation	4/140	39/16655	0.00106622	5743/5468/1432/3630	4
GO:0044843	cell cycle G1/S phase transition	9/140	257/16655	0.00110922	5925/207/596/595/7157/1543/983/1956/1017	9
GO:0002443	leukocyte mediated immunity	10/140	316/16655	0.00116175	3569/7124/3383/4843/3458/3565/3553/6347/3162/5319	10
GO:0070663	regulation of leukocyte proliferation	8/140	205/16655	0.00116368	836/3569/596/3458/3565/3553/2950/196	8
GO:0007431	salivary gland development	4/140	40/16655	0.00117153	3569/7124/5423/1956	4
GO:0010623	developmental programmed cell death	4/140	40/16655	0.00117153	596/3553/581/627	4
GO:0045582	positive regulation of T cell differentiation	5/140	72/16655	0.00117771	3569/3458/3565/3553/3932	5
GO:0001906	cell killing	6/140	111/16655	0.00117771	3383/4843/3458/3565/6347/213	6
GO:0050870	positive regulation of T cell activation	8/140	206/16655	0.00119666	3569/207/3458/3565/3553/6347/3932/6714	8
GO:0010042	response to manganese ion	3/140	17/16655	0.00121234	5743/7054/3643	3
GO:0030813	positive regulation of nucleotide catabolic process	3/140	17/16655	0.00121234	3091/3643/3630	3
GO:0032373	positive regulation of sterol transport	3/140	17/16655	0.00121234	4792/19/5444	3
GO:0032376	positive regulation of cholesterol transport	3/140	17/16655	0.00121234	4792/19/5444	3
GO:0032891	negative regulation of organic acid transport	3/140	17/16655	0.00121234	207/3553/134	3
GO:0034114	regulation of heterotypic cell-cell adhesion	3/140	17/16655	0.00121234	7124/3553/246	3
GO:0042053	regulation of dopamine metabolic process	3/140	17/16655	0.00121234	3350/1312/1815	3
GO:0042754	negative regulation of circadian rhythm	3/140	17/16655	0.00121234	5733/134/1813	3
GO:0044126	regulation of growth of symbiont in host	3/140	17/16655	0.00121234	7124/3458/4353	3
GO:0044146	negative regulation of growth of symbiont involved in interaction with host	3/140	17/16655	0.00121234	7124/3458/4353	3
GO:0060009	Sertoli cell development	3/140	17/16655	0.00121234	2099/3383/2100	3
GO:0070875	positive regulation of glycogen metabolic process	3/140	17/16655	0.00121234	207/3643/3630	3
GO:0005976	polysaccharide metabolic process	6/140	112/16655	0.00122001	207/4790/2932/3643/3630/8972	6
GO:0043029	T cell homeostasis	4/140	41/16655	0.00126735	836/207/596/581	4
GO:0071622	regulation of granulocyte chemotaxis	4/140	41/16655	0.00126735	3565/3553/6347/3576	4
GO:2000351	regulation of endothelial cell apoptotic process	4/140	41/16655	0.00126735	3383/3565/4780/8644	4
GO:1903749	positive regulation of establishment of protein localization to mitochondrion	6/140	113/16655	0.00127496	207/596/7157/841/6721/5599	6
GO:0051480	regulation of cytosolic calcium ion concentration	9/140	264/16655	0.00131896	2099/5733/4842/596/3553/581/5319/3932/1813	9
GO:0071482	cellular response to light stimulus	6/140	114/16655	0.00133417	5743/581/842/7157/5578/3091	6
GO:0034112	positive regulation of homotypic cell-cell adhesion	8/140	210/16655	0.00133592	3569/207/3458/3565/3553/6347/3932/6714	8
GO:0046486	glycerolipid metabolic process	11/140	384/16655	0.0013387	43/2099/2194/5444/5319/246/847/57406/4023/1571/1813	11
GO:0033344	cholesterol efflux	4/140	42/16655	0.00138283	4792/19/5444/6721	4
GO:0046676	negative regulation of insulin secretion	4/140	42/16655	0.00138283	5733/4842/3156/1813	4
GO:0000271	polysaccharide biosynthetic process	5/140	75/16655	0.00139073	207/4790/2932/3643/3630	5
GO:0030217	T cell differentiation	8/140	212/16655	0.00141521	3569/596/3458/3565/3553/7157/2322/3932	8
GO:1903039	positive regulation of leukocyte cell-cell adhesion	8/140	212/16655	0.00141521	3569/207/3458/3565/3553/6347/3932/6714	8
GO:0001558	regulation of cell growth	11/140	387/16655	0.00141725	4137/207/596/5468/7157/2932/5467/627/7422/2100/3630	11
GO:0009415	response to water	3/140	18/16655	0.00141725	7054/231/2100	3
GO:0014061	regulation of norepinephrine secretion	3/140	18/16655	0.00141725	5733/5742/152	3
GO:0042069	regulation of catecholamine metabolic process	3/140	18/16655	0.00141725	3350/1312/1815	3
GO:0042832	defense response to protozoan	3/140	18/16655	0.00141725	3569/3458/3565	3
GO:0044144	modulation of growth of symbiont involved in interaction with host	3/140	18/16655	0.00141725	7124/3458/4353	3
GO:0045986	negative regulation of smooth muscle contraction	3/140	18/16655	0.00141725	5743/134/152	3
GO:0071800	podosome assembly	3/140	18/16655	0.00141725	7124/5599/6714	3
GO:0071478	cellular response to radiation	7/140	162/16655	0.00144184	5743/581/842/7157/5578/1432/3091	7
GO:0032091	negative regulation of protein binding	5/140	76/16655	0.00146277	581/2932/5465/5595/5599	5
GO:0060416	response to growth hormone	4/140	43/16655	0.0014944	207/5770/5594/5595	4
GO:2000573	positive regulation of DNA biosynthetic process	4/140	43/16655	0.0014944	2932/5594/5595/6714	4
GO:0034637	cellular carbohydrate biosynthetic process	5/140	77/16655	0.00154834	207/2932/231/3643/3630	5
GO:0046031	ADP metabolic process	5/140	77/16655	0.00154834	7157/5465/3091/3643/3630	5
GO:0007595	lactation	4/140	44/16655	0.00162673	595/7498/3091/7422	4
GO:0090199	regulation of release of cytochrome c from mitochondria	4/140	44/16655	0.00162673	207/581/4318/7157	4
GO:0001894	tissue homeostasis	8/140	217/16655	0.00162673	596/581/231/760/2322/7422/6714/213	8
GO:0006525	arginine metabolic process	3/140	19/16655	0.00165478	4842/4843/4846	3
GO:0030828	positive regulation of cGMP biosynthetic process	3/140	19/16655	0.00165478	4842/4843/4846	3
GO:0048243	norepinephrine secretion	3/140	19/16655	0.00165478	5733/5742/152	3
GO:0006367	transcription initiation from RNA polymerase II promoter	9/140	275/16655	0.00172654	2099/207/142/5468/7157/5465/5467/196/2100	9
GO:0072577	endothelial cell apoptotic process	4/140	45/16655	0.00176353	3383/3565/4780/8644	4
GO:0098657	import into cell	4/140	45/16655	0.00176353	4842/1813/1814/1815	4
GO:0006986	response to unfolded protein	7/140	168/16655	0.0017687	3458/5770/6347/4780/581/595/3576	7
GO:0002064	epithelial cell development	8/140	221/16655	0.00182206	2099/7124/3383/3553/2932/3274/3091/2100	8
GO:0035176	social behavior	4/140	46/16655	0.00191051	7054/3553/1814/1815	4
GO:0046068	cGMP metabolic process	4/140	46/16655	0.00191051	4842/4843/7422/4846	4
GO:0051703	intraspecies interaction between organisms	4/140	46/16655	0.00191051	7054/3553/1814/1815	4
GO:0007567	parturition	3/140	20/16655	0.00191441	5733/6347/1543	3
GO:0010884	positive regulation of lipid storage	3/140	20/16655	0.00191441	4790/6721/4023	3
GO:0045649	regulation of macrophage differentiation	3/140	20/16655	0.00191441	5925/841/5578	3
GO:0051187	cofactor catabolic process	3/140	20/16655	0.00191441	3162/54657/54658	3
GO:0002223	stimulatory C-type lectin receptor signaling pathway	6/140	123/16655	0.00192681	5970/3553/4790/4792/841/6714	6
GO:0008203	cholesterol metabolic process	6/140	123/16655	0.00192681	3156/3565/19/6721/5467/847	6
GO:0051302	regulation of cell division	9/140	280/16655	0.00194071	5925/3553/332/847/7422/3643/3630/1813/1814	9
GO:0051346	negative regulation of hydrolase activity	11/140	404/16655	0.00197105	3569/7124/207/4842/332/4318/7157/841/7422/6714/4846	11
GO:0051251	positive regulation of lymphocyte activation	9/140	281/16655	0.00198736	3569/207/596/3458/3565/3553/6347/3932/6714	9
GO:0043902	positive regulation of multi-organism process	7/140	172/16655	0.00200946	7153/4843/3458/3725/5578/5328/1815	7
GO:0002637	regulation of immunoglobulin production	4/140	47/16655	0.00204935	3569/7124/3458/3565	4
GO:0043392	negative regulation of DNA binding	4/140	47/16655	0.00204935	3162/3725/4792/5465	4
GO:0048008	platelet-derived growth factor receptor signaling pathway	4/140	47/16655	0.00204935	5770/7422/6714/2152	4
GO:0090278	negative regulation of peptide hormone secretion	4/140	47/16655	0.00204935	5733/4842/3156/1813	4
GO:0019362	pyridine nucleotide metabolic process	6/140	125/16655	0.00207789	5743/7157/5465/3091/3643/3630	6
GO:0046496	nicotinamide nucleotide metabolic process	6/140	125/16655	0.00207789	5743/7157/5465/3091/3643/3630	6
GO:1903747	regulation of establishment of protein localization to mitochondrion	6/140	125/16655	0.00207789	207/596/7157/841/6721/5599	6
GO:0006073	cellular glucan metabolic process	5/140	83/16655	0.00212107	207/2932/3643/3630/8972	5
GO:0043266	regulation of potassium ion transport	5/140	83/16655	0.00212107	5733/4842/134/1813/4846	5
GO:0044042	glucan metabolic process	5/140	83/16655	0.00212107	207/2932/3643/3630/8972	5
GO:0016054	organic acid catabolic process	8/140	227/16655	0.00212502	207/1666/4842/4843/5444/5465/5467/4846	8
GO:0046395	carboxylic acid catabolic process	8/140	227/16655	0.00212502	207/1666/4842/4843/5444/5465/5467/4846	8
GO:0002220	innate immune response activating cell surface receptor signaling pathway	6/140	126/16655	0.00215566	5970/3553/4790/4792/841/6714	6
GO:0001562	response to protozoan	3/140	21/16655	0.00216634	3569/3458/3565	3
GO:0002029	desensitization of G-protein coupled receptor protein signaling pathway	3/140	21/16655	0.00216634	5733/1813/1814	3
GO:0010869	regulation of receptor biosynthetic process	3/140	21/16655	0.00216634	5468/5465/3091	3
GO:0022401	negative adaptation of signaling pathway	3/140	21/16655	0.00216634	5733/1813/1814	3
GO:0030825	positive regulation of cGMP metabolic process	3/140	21/16655	0.00216634	4842/4843/4846	3
GO:0044117	growth of symbiont in host	3/140	21/16655	0.00216634	7124/3458/4353	3
GO:0046697	decidualization	3/140	21/16655	0.00216634	5743/2099/5467	3
GO:0051043	regulation of membrane protein ectodomain proteolysis	3/140	21/16655	0.00216634	7124/3458/3553	3
GO:1902170	cellular response to reactive nitrogen species	3/140	21/16655	0.00216634	3091/5599/1017	3
GO:0042345	regulation of NF-kappaB import into nucleus	4/140	48/16655	0.00218119	5743/7124/3553/4792	4
GO:0042348	NF-kappaB import into nucleus	4/140	48/16655	0.00218119	5743/7124/3553/4792	4
GO:0050766	positive regulation of phagocytosis	4/140	48/16655	0.00218119	7124/3553/6347/5468	4
GO:0043401	steroid hormone mediated signaling pathway	7/140	176/16655	0.00225103	2099/5925/5468/5465/5467/2100/6714	7
GO:0009615	response to virus	11/140	412/16655	0.00225714	3569/5970/7124/596/3458/3565/1432/1543/3932/766/6714	11
GO:0034765	regulation of ion transmembrane transport	11/140	412/16655	0.00225714	5733/207/4842/3756/6347/581/4318/1813/1814/1815/2641	11
GO:0010518	positive regulation of phospholipase activity	5/140	85/16655	0.00232401	2099/6401/5578/5319/1956	5
GO:0045621	positive regulation of lymphocyte differentiation	5/140	85/16655	0.00232401	3569/3458/3565/3553/3932	5
GO:0002792	negative regulation of peptide secretion	4/140	49/16655	0.00234363	5733/4842/3156/1813	4
GO:0043535	regulation of blood vessel endothelial cell migration	4/140	49/16655	0.00234363	5743/207/5578/7422	4
GO:0045661	regulation of myoblast differentiation	4/140	49/16655	0.00234363	7124/1432/4759/5467	4
GO:0042098	T cell proliferation	7/140	178/16655	0.00238971	836/3569/3458/3565/3553/581/7157	7
GO:0060402	calcium ion transport into cytosol	6/140	129/16655	0.00239347	4842/596/581/5319/3932/1813	6
GO:0006165	nucleoside diphosphate phosphorylation	5/140	86/16655	0.00243644	7157/5465/3091/3643/3630	5
GO:0019319	hexose biosynthetic process	5/140	86/16655	0.00243644	3569/5465/231/3630/2641	5
GO:0002052	positive regulation of neuroblast proliferation	3/140	22/16655	0.00244261	3091/7422/1813	3
GO:0002691	regulation of cellular extravasation	3/140	22/16655	0.00244261	5733/3383/6347	3
GO:0010996	response to auditory stimulus	3/140	22/16655	0.00244261	3569/3091/1813	3
GO:0015874	norepinephrine transport	3/140	22/16655	0.00244261	5733/5742/152	3
GO:0030826	regulation of cGMP biosynthetic process	3/140	22/16655	0.00244261	4842/4843/4846	3
GO:0031954	positive regulation of protein autophosphorylation	3/140	22/16655	0.00244261	7422/6714/3630	3
GO:0032461	positive regulation of protein oligomerization	3/140	22/16655	0.00244261	581/7157/4312	3
GO:0044110	growth involved in symbiotic interaction	3/140	22/16655	0.00244261	7124/3458/4353	3
GO:0044116	growth of symbiont involved in interaction with host	3/140	22/16655	0.00244261	7124/3458/4353	3
GO:0035966	response to topologically incorrect protein	7/140	179/16655	0.00244278	3458/5770/6347/4780/581/595/3576	7
GO:0034764	positive regulation of transmembrane transport	6/140	130/16655	0.00246495	4842/6347/581/760/1815/2641	6
GO:0051155	positive regulation of striated muscle cell differentiation	4/140	50/16655	0.00249483	596/3565/1432/4759	4
GO:1904356	regulation of telomere maintenance via telomere lengthening	4/140	50/16655	0.00249483	142/5594/5595/6714	4
GO:0042391	regulation of membrane potential	10/140	354/16655	0.00252149	596/3458/3756/581/3725/2932/627/6714/134/1815	10
GO:0050863	regulation of T cell activation	9/140	293/16655	0.00255494	836/3569/207/3458/3565/3553/6347/3932/6714	9
GO:0060401	cytosolic calcium ion transport	6/140	131/16655	0.00255494	4842/596/581/5319/3932/1813	6
GO:0072524	pyridine-containing compound metabolic process	6/140	132/16655	0.00265249	5743/7157/5465/3091/3643/3630	6
GO:0016049	cell growth	12/140	489/16655	0.00265249	3569/4137/207/596/5468/7157/2932/5467/627/7422/2100/3630	12
GO:0002286	T cell activation involved in immune response	5/140	88/16655	0.00265249	3569/3383/3458/3565/7157	5
GO:0003073	regulation of systemic arterial blood pressure	5/140	88/16655	0.00265249	6648/134/1813/1814/4846	5
GO:0032941	secretion by tissue	5/140	88/16655	0.00265249	595/7498/3091/7422/134	5
GO:0033238	regulation of cellular amine metabolic process	5/140	88/16655	0.00265249	3350/1728/1312/3630/1815	5
GO:0042100	B cell proliferation	5/140	88/16655	0.00265249	836/596/3565/581/196	5
GO:0022898	regulation of transmembrane transporter activity	7/140	182/16655	0.00265841	4842/596/4318/3630/1813/1814/1815	7
GO:0005978	glycogen biosynthetic process	4/140	51/16655	0.00265841	207/2932/3643/3630	4
GO:0009250	glucan biosynthetic process	4/140	51/16655	0.00265841	207/2932/3643/3630	4
GO:0032370	positive regulation of lipid transport	4/140	51/16655	0.00265841	3553/4792/19/5444	4
GO:0002092	positive regulation of receptor internalization	3/140	23/16655	0.0027297	6401/7422/1813	3
GO:0007263	nitric oxide mediated signal transduction	3/140	23/16655	0.0027297	4842/4843/4846	3
GO:0023058	adaptation of signaling pathway	3/140	23/16655	0.0027297	5733/1813/1814	3
GO:0031063	regulation of histone deacetylation	3/140	23/16655	0.0027297	7157/7422/5599	3
GO:0032069	regulation of nuclease activity	3/140	23/16655	0.0027297	207/5770/581	3
GO:0043252	sodium-independent organic anion transport	3/140	23/16655	0.0027297	10599/28234/213	3
GO:0060008	Sertoli cell differentiation	3/140	23/16655	0.0027297	2099/3383/2100	3
GO:0071731	response to nitric oxide	3/140	23/16655	0.0027297	4842/5599/1017	3
GO:0090322	regulation of superoxide metabolic process	3/140	23/16655	0.0027297	7124/2950/4780	3
GO:0002009	morphogenesis of an epithelium	12/140	492/16655	0.00275686	2099/3569/7124/596/581/841/760/768/3091/7422/1956/6714	12
GO:0090277	positive regulation of peptide hormone secretion	5/140	89/16655	0.0027572	3091/5467/3630/1813/2641	5
GO:0032874	positive regulation of stress-activated MAPK cascade	6/140	134/16655	0.00282061	7124/3156/3553/5770/7498/7422	6
GO:0055078	sodium ion homeostasis	4/140	52/16655	0.00283079	1312/134/1813/1814	4
GO:0019932	second-messenger-mediated signaling	8/140	240/16655	0.00288504	4842/4843/6401/3576/3269/1956/1815/4846	8
GO:0007569	cell aging	5/140	90/16655	0.00288805	3383/596/7157/1432/983	5
GO:0015696	ammonium transport	5/140	90/16655	0.00288805	3350/4842/1813/1814/1815	5
GO:0070304	positive regulation of stress-activated protein kinase signaling cascade	6/140	135/16655	0.00291972	7124/3156/3553/5770/7498/7422	6
GO:0030850	prostate gland development	4/140	53/16655	0.00300907	1588/2099/196/2100	4
GO:0032655	regulation of interleukin-12 production	4/140	53/16655	0.00300907	5970/3458/4790/1432	4
GO:0045844	positive regulation of striated muscle tissue development	4/140	53/16655	0.00300907	596/3156/1432/983	4
GO:0048538	thymus development	4/140	53/16655	0.00300907	7299/596/5594/5595	4
GO:0048636	positive regulation of muscle organ development	4/140	53/16655	0.00300907	596/3156/1432/983	4
GO:0050918	positive chemotaxis	4/140	53/16655	0.00300907	5578/3576/7422/2152	4
GO:0001952	regulation of cell-matrix adhesion	5/140	91/16655	0.00300907	596/2932/5328/7422/6714	5
GO:0014013	regulation of gliogenesis	5/140	91/16655	0.00300907	5970/3553/5468/983/1814	5
GO:0046939	nucleotide phosphorylation	5/140	91/16655	0.00300907	7157/5465/3091/3643/3630	5
GO:0044724	single-organism carbohydrate catabolic process	6/140	136/16655	0.00300907	7157/5465/3091/4759/3643/3630	6
GO:0002227	innate immune response in mucosa	3/140	24/16655	0.00302821	4843/3565/5319	3
GO:0038084	vascular endothelial growth factor signaling pathway	3/140	24/16655	0.00302821	7498/2322/7422	3
GO:0045745	positive regulation of G-protein coupled receptor protein signaling pathway	3/140	24/16655	0.00302821	4842/1813/1814	3
GO:0045940	positive regulation of steroid metabolic process	3/140	24/16655	0.00302821	7124/3458/3553	3
GO:0045979	positive regulation of nucleoside metabolic process	3/140	24/16655	0.00302821	3091/3643/3630	3
GO:0060334	regulation of interferon-gamma-mediated signaling pathway	3/140	24/16655	0.00302821	3458/5770/5468	3
GO:0060397	JAK-STAT cascade involved in growth hormone signaling pathway	3/140	24/16655	0.00302821	5770/5594/5595	3
GO:0071379	cellular response to prostaglandin stimulus	3/140	24/16655	0.00302821	207/5468/8644	3
GO:1900117	regulation of execution phase of apoptosis	3/140	24/16655	0.00302821	581/7157/2641	3
GO:1903580	positive regulation of ATP metabolic process	3/140	24/16655	0.00302821	3091/3643/3630	3
GO:2000178	negative regulation of neural precursor cell proliferation	3/140	24/16655	0.00302821	3553/7157/627	3
GO:0000079	regulation of cyclin-dependent protein serine/threonine kinase activity	5/140	92/16655	0.00312216	836/207/595/1956/6714	5
GO:0009135	purine nucleoside diphosphate metabolic process	5/140	92/16655	0.00312216	7157/5465/3091/3643/3630	5
GO:0009179	purine ribonucleoside diphosphate metabolic process	5/140	92/16655	0.00312216	7157/5465/3091/3643/3630	5
GO:0045454	cell redox homeostasis	5/140	92/16655	0.00312216	3569/4842/4843/4780/4846	5
GO:0010830	regulation of myotube differentiation	4/140	54/16655	0.00317814	596/3565/1432/4759	4
GO:0032615	interleukin-12 production	4/140	54/16655	0.00317814	5970/3458/4790/1432	4
GO:0035872	nucleotide-binding domain, leucine rich repeat containing receptor signaling pathway	4/140	54/16655	0.00317814	5970/596/4792/841	4
GO:1901863	positive regulation of muscle tissue development	4/140	54/16655	0.00317814	596/3156/1432/983	4
GO:0072655	establishment of protein localization to mitochondrion	7/140	189/16655	0.00318458	207/596/581/7157/841/6721/5599	7
GO:0016053	organic acid biosynthetic process	9/140	305/16655	0.00322321	5743/240/2194/5319/5742/1543/246/8644/4023	9
GO:0046394	carboxylic acid biosynthetic process	9/140	305/16655	0.00322321	5743/240/2194/5319/5742/1543/246/8644/4023	9
GO:0001892	embryonic placenta development	5/140	93/16655	0.00324891	207/841/3091/5594/1956	5
GO:0002377	immunoglobulin production	5/140	93/16655	0.00324891	3569/7124/3458/3565/5423	5
GO:0043473	pigmentation	5/140	93/16655	0.00324891	7054/7299/596/581/1813	5
GO:0046364	monosaccharide biosynthetic process	5/140	93/16655	0.00324891	3569/5465/231/3630/2641	5
GO:0071346	cellular response to interferon-gamma	6/140	139/16655	0.00329643	3383/4843/3458/5770/6347/5468	6
GO:0002696	positive regulation of leukocyte activation	9/140	307/16655	0.00335697	3569/207/596/3458/3565/3553/6347/3932/6714	9
GO:0009065	glutamine family amino acid catabolic process	3/140	25/16655	0.00335697	4842/4843/4846	3
GO:0045939	negative regulation of steroid metabolic process	3/140	25/16655	0.00335697	4790/54576/54658	3
GO:0060330	regulation of response to interferon-gamma	3/140	25/16655	0.00335697	3458/5770/5468	3
GO:0071364	cellular response to epidermal growth factor stimulus	3/140	25/16655	0.00335697	207/2950/1956	3
GO:0032413	negative regulation of ion transmembrane transporter activity	4/140	55/16655	0.00335697	4318/1813/1814/1815	4
GO:0051349	positive regulation of lyase activity	4/140	55/16655	0.00335697	4842/4843/5578/4846	4
GO:0051881	regulation of mitochondrial membrane potential	4/140	55/16655	0.00335697	596/581/2932/6714	4
GO:0060688	regulation of morphogenesis of a branching structure	4/140	55/16655	0.00335697	2099/7124/3553/7422	4
GO:0070228	regulation of lymphocyte apoptotic process	4/140	55/16655	0.00335697	581/7157/841/3091	4
GO:0009185	ribonucleoside diphosphate metabolic process	5/140	94/16655	0.00337636	7157/5465/3091/3643/3630	5
GO:0045619	regulation of lymphocyte differentiation	6/140	140/16655	0.00338565	3569/3458/3565/3553/2322/3932	6
GO:0061351	neural precursor cell proliferation	6/140	140/16655	0.00338565	3553/7157/3091/627/7422/1813	6
GO:0006644	phospholipid metabolic process	10/140	372/16655	0.00343483	43/5444/5319/2322/5467/246/57406/6714/4023/1813	10
GO:0010517	regulation of phospholipase activity	5/140	95/16655	0.00352373	2099/6401/5578/5319/1956	5
GO:0042990	regulation of transcription factor import into nucleus	5/140	95/16655	0.00352373	5743/7124/3553/4792/2932	5
GO:0048568	embryonic organ development	11/140	440/16655	0.00352373	7124/7054/207/7157/841/3576/3091/5594/7422/1956/5595	11
GO:0070585	protein localization to mitochondrion	7/140	193/16655	0.00352483	207/596/581/7157/841/6721/5599	7
GO:0030098	lymphocyte differentiation	9/140	310/16655	0.00354139	3569/596/3458/3565/3553/581/7157/2322/3932	9
GO:0030888	regulation of B cell proliferation	4/140	56/16655	0.00355544	836/596/3565/196	4
GO:0043124	negative regulation of I-kappaB kinase/NF-kappaB signaling	4/140	56/16655	0.00355544	2099/2950/4792/841	4
GO:1902041	regulation of extrinsic apoptotic signaling pathway via death domain receptors	4/140	56/16655	0.00355544	3383/3162/841/4846	4
GO:2001244	positive regulation of intrinsic apoptotic signaling pathway	4/140	56/16655	0.00355544	596/581/7157/3932	4
GO:0019079	viral genome replication	5/140	96/16655	0.00366938	7124/7153/596/6347/3576	5
GO:0030218	erythrocyte differentiation	5/140	96/16655	0.00366938	836/5925/1432/3091/7422	5
GO:0008544	epidermis development	9/140	312/16655	0.00368261	836/5970/7124/596/5465/5467/1956/3643/8644	9
GO:0008299	isoprenoid biosynthetic process	3/140	26/16655	0.00369393	3156/1543/8644	3
GO:0010800	positive regulation of peptidyl-threonine phosphorylation	3/140	26/16655	0.00369393	2932/5594/2641	3
GO:0032369	negative regulation of lipid transport	3/140	26/16655	0.00369393	207/4790/6721	3
GO:0045932	negative regulation of muscle contraction	3/140	26/16655	0.00369393	5743/134/152	3
GO:0051354	negative regulation of oxidoreductase activity	3/140	26/16655	0.00369393	4790/2932/3630	3
GO:1902042	negative regulation of extrinsic apoptotic signaling pathway via death domain receptors	3/140	26/16655	0.00369393	3383/3162/4846	3
GO:2000279	negative regulation of DNA biosynthetic process	3/140	26/16655	0.00369393	5468/7157/6714	3
GO:2000352	negative regulation of endothelial cell apoptotic process	3/140	26/16655	0.00369393	3383/3565/4780	3
GO:0043433	negative regulation of sequence-specific DNA binding transcription factor activity	6/140	143/16655	0.00371157	2099/5925/1545/3162/4792/847	6
GO:0070059	intrinsic apoptotic signaling pathway in response to endoplasmic reticulum stress	4/140	57/16655	0.00375516	596/5770/581/2932	4
GO:0097006	regulation of plasma lipoprotein particle levels	4/140	57/16655	0.00375516	3162/4353/19/4023	4
GO:1901992	positive regulation of mitotic cell cycle phase transition	4/140	57/16655	0.00375516	5925/332/595/1543	4
GO:0050670	regulation of lymphocyte proliferation	7/140	196/16655	0.00379031	836/3569/596/3458/3565/3553/196	7
GO:0031016	pancreas development	5/140	97/16655	0.00379866	3569/207/2932/3643/3630	5
GO:0008543	fibroblast growth factor receptor signaling pathway	9/140	315/16655	0.00388602	207/842/2932/5578/3932/5594/1956/5595/6714	9
GO:0050867	positive regulation of cell activation	9/140	315/16655	0.00388602	3569/207/596/3458/3565/3553/6347/3932/6714	9
GO:0010506	regulation of autophagy	7/140	197/16655	0.00389088	4137/207/596/3458/7157/6721/3091	7
GO:0007589	body fluid secretion	5/140	98/16655	0.0039519	595/7498/3091/7422/134	5
GO:0042991	transcription factor import into nucleus	5/140	98/16655	0.0039519	5743/7124/3553/4792/2932	5
GO:0044264	cellular polysaccharide metabolic process	5/140	98/16655	0.0039519	207/2932/3643/3630/8972	5
GO:0060193	positive regulation of lipase activity	5/140	98/16655	0.0039519	2099/6401/5578/5319/1956	5
GO:0072091	regulation of stem cell proliferation	5/140	98/16655	0.0039519	7157/3091/627/7422/1813	5
GO:0048146	positive regulation of fibroblast proliferation	4/140	58/16655	0.00397359	2099/3725/5319/1956	4
GO:0032944	regulation of mononuclear cell proliferation	7/140	198/16655	0.00398427	836/3569/596/3458/3565/3553/196	7
GO:0030900	forebrain development	10/140	382/16655	0.00405806	836/5733/7054/581/2932/3091/1956/2100/6714/1813	10
GO:0001964	startle response	3/140	27/16655	0.00405806	3756/1813/1814	3
GO:0002714	positive regulation of B cell mediated immunity	3/140	27/16655	0.00405806	7124/3458/3565	3
GO:0002891	positive regulation of immunoglobulin mediated immune response	3/140	27/16655	0.00405806	7124/3458/3565	3
GO:0042346	positive regulation of NF-kappaB import into nucleus	3/140	27/16655	0.00405806	5743/7124/3553	3
GO:0071549	cellular response to dexamethasone stimulus	3/140	27/16655	0.00405806	3569/6347/842	3
GO:1903170	negative regulation of calcium ion transmembrane transport	3/140	27/16655	0.00405806	5733/1813/1815	3
GO:0061138	morphogenesis of a branching epithelium	7/140	200/16655	0.0041949	2099/3569/7124/596/581/7422/6714	7
GO:0007088	regulation of mitotic nuclear division	6/140	147/16655	0.00419654	5925/3553/332/3643/3630/1814	6
GO:0032611	interleukin-1 beta production	4/140	59/16655	0.00419976	3458/3553/2950/19	4
GO:0045732	positive regulation of protein catabolic process	8/140	259/16655	0.00432952	7124/5925/207/3458/3553/4780/2932/983	8
GO:0060041	retina development in camera-type eye	6/140	148/16655	0.00433429	43/3565/1545/581/3091/1815	6
GO:0032387	negative regulation of intracellular transport	6/140	149/16655	0.00447305	4137/4842/596/3162/4792/2932	6
GO:0001516	prostaglandin biosynthetic process	3/140	28/16655	0.00447305	5743/5742/8644	3
GO:0030262	apoptotic nuclear changes	3/140	28/16655	0.00447305	836/7153/581	3
GO:0045601	regulation of endothelial cell differentiation	3/140	28/16655	0.00447305	7124/3553/7498	3
GO:0046320	regulation of fatty acid oxidation	3/140	28/16655	0.00447305	207/5468/5465	3
GO:0046457	prostanoid biosynthetic process	3/140	28/16655	0.00447305	5743/5742/8644	3
GO:0071624	positive regulation of granulocyte chemotaxis	3/140	28/16655	0.00447305	3565/3553/3576	3
GO:0090200	positive regulation of release of cytochrome c from mitochondria	3/140	28/16655	0.00447305	581/4318/7157	3
GO:1901657	glycosyl compound metabolic process	10/140	388/16655	0.0044961	7054/6817/3156/7157/5465/231/3091/3643/8644/3630	10
GO:0072089	stem cell proliferation	6/140	150/16655	0.00460577	7157/3091/5243/627/7422/1813	6
GO:0006090	pyruvate metabolic process	5/140	102/16655	0.00462367	7157/5465/3091/3643/3630	5
GO:0051591	response to cAMP	5/140	102/16655	0.00462367	5970/7299/3725/2353/1017	5
GO:2000134	negative regulation of G1/S transition of mitotic cell cycle	5/140	102/16655	0.00462367	5925/596/595/7157/1017	5
GO:0006936	muscle contraction	9/140	325/16655	0.00468962	5743/5733/4842/5578/3363/5742/134/152/1813	9
GO:0031018	endocrine pancreas development	4/140	61/16655	0.00468962	3569/207/2932/3630	4
GO:0032922	circadian regulation of gene expression	4/140	61/16655	0.00468962	5465/196/1813/1814	4
GO:0003015	heart process	8/140	263/16655	0.00470335	7054/4842/3458/5578/6714/134/1813/4846	8
GO:0002700	regulation of production of molecular mediator of immune response	5/140	103/16655	0.00480922	3569/7124/3458/3565/3162	5
GO:0043542	endothelial cell migration	6/140	152/16655	0.00488516	5743/207/1545/5578/7422/4846	6
GO:0010226	response to lithium ion	3/140	29/16655	0.00488516	5743/5468/2932	3
GO:0030224	monocyte differentiation	3/140	29/16655	0.00488516	5468/3725/7422	3
GO:0035066	positive regulation of histone acetylation	3/140	29/16655	0.00488516	4842/3553/5595	3
GO:0043368	positive T cell selection	3/140	29/16655	0.00488516	3569/596/3565	3
GO:0045730	respiratory burst	3/140	29/16655	0.00488516	4353/3643/3630	3
GO:0046685	response to arsenic-containing substance	3/140	29/16655	0.00488516	7389/3162/1543	3
GO:1901661	quinone metabolic process	3/140	29/16655	0.00488516	3156/231/8644	3
GO:1902624	positive regulation of neutrophil migration	3/140	29/16655	0.00488516	5733/3553/3576	3
GO:2001267	regulation of cysteine-type endopeptidase activity involved in apoptotic signaling pathway	3/140	29/16655	0.00488516	581/4318/841	3
GO:0014068	positive regulation of phosphatidylinositol 3-kinase signaling	4/140	62/16655	0.00492911	2322/5467/847/3630	4
GO:1901989	positive regulation of cell cycle phase transition	4/140	62/16655	0.00492911	5925/332/595/1543	4
GO:0051147	regulation of muscle cell differentiation	6/140	153/16655	0.00501304	7124/596/3565/1432/4759/5467	6
GO:0048469	cell maturation	6/140	154/16655	0.00516876	5925/596/5468/2932/3091/7422	6
GO:0021761	limbic system development	5/140	105/16655	0.00516876	836/581/2932/2100/1813	5
GO:0034250	positive regulation of cellular amide metabolic process	5/140	105/16655	0.00516876	3569/7124/4780/5594/5595	5
GO:1902807	negative regulation of cell cycle G1/S phase transition	5/140	105/16655	0.00516876	5925/596/595/7157/1017	5
GO:0061045	negative regulation of wound healing	4/140	63/16655	0.00520625	5733/3156/5328/4846	4
GO:0001649	osteoblast differentiation	7/140	209/16655	0.00522662	43/2099/3569/7124/207/2194/847	7
GO:0010656	negative regulation of muscle cell apoptotic process	3/140	30/16655	0.00533155	3156/3162/2932	3
GO:0038066	p38MAPK cascade	3/140	30/16655	0.00533155	1432/7498/7422	3
GO:0045987	positive regulation of smooth muscle contraction	3/140	30/16655	0.00533155	5743/5733/5742	3
GO:0051452	intracellular pH reduction	3/140	30/16655	0.00533155	596/760/766	3
GO:0071392	cellular response to estradiol stimulus	3/140	30/16655	0.00533155	2099/1956/2100	3
GO:0071542	dopaminergic neuron differentiation	3/140	30/16655	0.00533155	2932/3091/7422	3
GO:2000758	positive regulation of peptidyl-lysine acetylation	3/140	30/16655	0.00533155	4842/3553/5595	3
GO:0048634	regulation of muscle organ development	5/140	106/16655	0.00534912	3569/596/3156/1432/983	5
GO:0070509	calcium ion import	6/140	156/16655	0.00546735	4842/6347/581/3932/1813/2641	6
GO:0034103	regulation of tissue remodeling	4/140	64/16655	0.00546735	581/7157/760/6714	4
GO:0043502	regulation of muscle adaptation	4/140	64/16655	0.00546735	142/2932/5578/4846	4
GO:1904062	regulation of cation transmembrane transport	7/140	211/16655	0.00546735	5733/4842/581/4318/1813/1814/1815	7
GO:0031503	protein complex localization	5/140	107/16655	0.0055537	5743/7124/3553/332/4792	5
GO:0006813	potassium ion transport	7/140	212/16655	0.00560695	5733/4842/3756/1017/134/1813/4846	7
GO:0010595	positive regulation of endothelial cell migration	4/140	65/16655	0.0057344	5743/207/5578/7422	4
GO:0033692	cellular polysaccharide biosynthetic process	4/140	65/16655	0.0057344	207/2932/3643/3630	4
GO:0042446	hormone biosynthetic process	4/140	65/16655	0.0057344	1588/231/3091/8644	4
GO:0045761	regulation of adenylate cyclase activity	4/140	65/16655	0.0057344	5578/1813/1814/1815	4
GO:0050853	B cell receptor signaling pathway	4/140	65/16655	0.0057344	596/581/3932/5594	4
GO:0051588	regulation of neurotransmitter transport	4/140	65/16655	0.0057344	4842/1813/1814/1815	4
GO:0009791	post-embryonic development	5/140	108/16655	0.0057344	596/1544/581/2322/7422	5
GO:0032635	interleukin-6 production	5/140	108/16655	0.0057344	3569/7124/4843/3458/3553	5
GO:0042303	molting cycle	5/140	108/16655	0.0057344	5743/5970/7124/596/1956	5
GO:0042633	hair cycle	5/140	108/16655	0.0057344	5743/5970/7124/596/1956	5
GO:0044774	mitotic DNA integrity checkpoint	5/140	108/16655	0.0057344	7153/595/7157/983/1017	5
GO:0006639	acylglycerol metabolic process	6/140	158/16655	0.00575294	2099/2194/847/57406/4023/1571	6
GO:0002639	positive regulation of immunoglobulin production	3/140	31/16655	0.00575294	3569/3458/3565	3
GO:0015721	bile acid and bile salt transport	3/140	31/16655	0.00575294	10599/28234/213	3
GO:0033028	myeloid cell apoptotic process	3/140	31/16655	0.00575294	3569/596/3458	3
GO:0033198	response to ATP	3/140	31/16655	0.00575294	5743/3553/6347	3
GO:0042149	cellular response to glucose starvation	3/140	31/16655	0.00575294	596/4780/7157	3
GO:0043114	regulation of vascular permeability	3/140	31/16655	0.00575294	3269/7422/6714	3
GO:0048873	homeostasis of number of cells within a tissue	3/140	31/16655	0.00575294	596/581/2322	3
GO:0060396	growth hormone receptor signaling pathway	3/140	31/16655	0.00575294	5770/5594/5595	3
GO:0009755	hormone-mediated signaling pathway	7/140	214/16655	0.00582222	2099/5925/5468/5465/5467/2100/6714	7
GO:0006638	neutral lipid metabolic process	6/140	159/16655	0.00590138	2099/2194/847/57406/4023/1571	6
GO:0044772	mitotic cell cycle phase transition	11/140	477/16655	0.00608099	5925/207/596/332/595/7157/1543/5243/983/1956/1017	11
GO:0002440	production of molecular mediator of immune response	6/140	160/16655	0.00608099	3569/7124/3458/3565/3162/5423	6
GO:0034341	response to interferon-gamma	6/140	161/16655	0.00625539	3383/4843/3458/5770/6347/5468	6
GO:0006182	cGMP biosynthetic process	3/140	32/16655	0.00625539	4842/4843/4846	3
GO:0010543	regulation of platelet activation	3/140	32/16655	0.00625539	5733/5578/4846	3
GO:0031640	killing of cells of other organism	3/140	32/16655	0.00625539	4843/3458/213	3
GO:0044364	disruption of cells of other organism	3/140	32/16655	0.00625539	4843/3458/213	3
GO:0045687	positive regulation of glial cell differentiation	3/140	32/16655	0.00625539	5970/3553/5468	3
GO:0071242	cellular response to ammonium ion	3/140	32/16655	0.00625539	2932/3269/5328	3
GO:0071378	cellular response to growth hormone stimulus	3/140	32/16655	0.00625539	5770/5594/5595	3
GO:0032637	interleukin-8 production	4/140	67/16655	0.0062963	7124/4843/3553/5319	4
GO:0032755	positive regulation of interleukin-6 production	4/140	67/16655	0.0062963	3569/7124/3458/3553	4
GO:0050772	positive regulation of axonogenesis	4/140	67/16655	0.0062963	4137/2932/627/7422	4
GO:0006839	mitochondrial transport	8/140	279/16655	0.00645184	207/596/581/7157/841/2932/6721/5599	8
GO:0045580	regulation of T cell differentiation	5/140	112/16655	0.00659579	3569/3458/3565/3553/3932	5
GO:0008361	regulation of cell size	6/140	163/16655	0.00660148	4137/207/2932/3091/627/7422	6
GO:0021543	pallium development	6/140	163/16655	0.00660148	836/7054/581/2932/3091/1956	6
GO:0010863	positive regulation of phospholipase C activity	4/140	68/16655	0.00661386	2099/6401/5578/1956	4
GO:0032204	regulation of telomere maintenance	4/140	68/16655	0.00661386	142/5594/5595/6714	4
GO:0034644	cellular response to UV	4/140	68/16655	0.00661386	5743/581/842/7157	4
GO:0007212	dopamine receptor signaling pathway	3/140	33/16655	0.00674359	1813/1814/1815	3
GO:0014037	Schwann cell differentiation	3/140	33/16655	0.00674359	5970/207/983	3
GO:0015872	dopamine transport	3/140	33/16655	0.00674359	1813/1814/1815	3
GO:0043267	negative regulation of potassium ion transport	3/140	33/16655	0.00674359	5733/4842/4846	3
GO:0043403	skeletal muscle tissue regeneration	3/140	33/16655	0.00674359	1432/5467/5328	3
GO:0045851	pH reduction	3/140	33/16655	0.00674359	596/760/766	3
GO:0045923	positive regulation of fatty acid metabolic process	3/140	33/16655	0.00674359	5743/5468/5465	3
GO:0090311	regulation of protein deacetylation	3/140	33/16655	0.00674359	7157/7422/5599	3
GO:0031570	DNA integrity checkpoint	6/140	164/16655	0.00674359	7153/595/7157/1432/983/1017	6
GO:0050866	negative regulation of cell activation	6/140	164/16655	0.00674359	836/5733/3565/3162/2322/4846	6
GO:0021987	cerebral cortex development	5/140	113/16655	0.0067736	7054/581/2932/3091/1956	5
GO:0046631	alpha-beta T cell activation	5/140	113/16655	0.0067736	3569/596/3458/3565/3630	5
GO:0006635	fatty acid beta-oxidation	4/140	69/16655	0.00690247	207/1666/5465/5467	4
GO:0032612	interleukin-1 production	4/140	69/16655	0.00690247	3458/3553/2950/19	4
GO:0060078	regulation of postsynaptic membrane potential	4/140	69/16655	0.00690247	2932/627/134/1815	4
GO:0048754	branching morphogenesis of an epithelial tube	6/140	165/16655	0.00692147	2099/7124/596/581/7422/6714	6
GO:0072657	protein localization to membrane	11/140	487/16655	0.00695878	7124/207/596/3458/6347/581/7157/841/1956/5599/134	11
GO:0009132	nucleoside diphosphate metabolic process	5/140	114/16655	0.00699801	7157/5465/3091/3643/3630	5
GO:0030183	B cell differentiation	5/140	114/16655	0.00699801	596/3565/581/7157/2322	5
GO:0060191	regulation of lipase activity	5/140	114/16655	0.00699801	2099/6401/5578/5319/1956	5
GO:0002708	positive regulation of lymphocyte mediated immunity	4/140	70/16655	0.00723321	7124/3458/3565/3553	4
GO:0002824	positive regulation of adaptive immune response based on somatic recombination of immune receptors built from immunoglobulin superfamily domains	4/140	70/16655	0.00723321	7124/3458/3565/3553	4
GO:1900274	regulation of phospholipase C activity	4/140	70/16655	0.00723321	2099/6401/5578/1956	4
GO:0002385	mucosal immune response	3/140	34/16655	0.00724347	4843/3565/5319	3
GO:0006692	prostanoid metabolic process	3/140	34/16655	0.00724347	5743/5742/8644	3
GO:0006693	prostaglandin metabolic process	3/140	34/16655	0.00724347	5743/5742/8644	3
GO:0034694	response to prostaglandin	3/140	34/16655	0.00724347	207/5468/8644	3
GO:0043370	regulation of CD4-positive, alpha-beta T cell differentiation	3/140	34/16655	0.00724347	3569/3458/3565	3
GO:1902622	regulation of neutrophil migration	3/140	34/16655	0.00724347	5733/3553/3576	3
GO:1904036	negative regulation of epithelial cell apoptotic process	3/140	34/16655	0.00724347	3383/3565/4780	3
GO:2001258	negative regulation of cation channel activity	3/140	34/16655	0.00724347	4318/1813/1815	3
GO:0043903	regulation of symbiosis, encompassing mutualism through parasitism	7/140	225/16655	0.00741512	7124/7153/596/3458/4353/3725/3576	7
GO:0050851	antigen receptor-mediated signaling pathway	7/140	225/16655	0.00741512	5970/596/581/4790/4792/3932/5594	7
GO:1903169	regulation of calcium ion transmembrane transport	5/140	116/16655	0.00747155	5733/4842/581/1813/1815	5
GO:0009112	nucleobase metabolic process	4/140	71/16655	0.00755268	3553/7498/847/5594	4
GO:0007586	digestion	6/140	169/16655	0.00768649	5733/5319/3274/54658/8972/1814	6
GO:0016570	histone modification	10/140	423/16655	0.00770845	4842/3553/7157/5578/983/7422/5595/5599/1017/2641	10
GO:0046887	positive regulation of hormone secretion	5/140	117/16655	0.00773195	3091/5467/3630/1813/2641	5
GO:0032105	negative regulation of response to extracellular stimulus	3/140	35/16655	0.007788	7157/5465/2641	3
GO:0032108	negative regulation of response to nutrient levels	3/140	35/16655	0.007788	7157/5465/2641	3
GO:0032735	positive regulation of interleukin-12 production	3/140	35/16655	0.007788	5970/3458/1432	3
GO:0051646	mitochondrion localization	3/140	35/16655	0.007788	4137/3091/213	3
GO:0051898	negative regulation of protein kinase B signaling	3/140	35/16655	0.007788	7498/1813/1814	3
GO:0070232	regulation of T cell apoptotic process	3/140	35/16655	0.007788	7157/841/3091	3
GO:0070266	necroptotic process	3/140	35/16655	0.007788	7124/7157/841	3
GO:0071827	plasma lipoprotein particle organization	3/140	35/16655	0.007788	4353/19/4023	3
GO:1901985	positive regulation of protein acetylation	3/140	35/16655	0.007788	4842/3553/5595	3
GO:0051783	regulation of nuclear division	6/140	170/16655	0.00784878	5925/3553/332/3643/3630/1814	6
GO:0043534	blood vessel endothelial cell migration	4/140	72/16655	0.00786951	5743/207/5578/7422	4
GO:1901991	negative regulation of mitotic cell cycle phase transition	6/140	171/16655	0.00806807	5925/596/595/7157/983/1017	6
GO:0008016	regulation of heart contraction	7/140	229/16655	0.00807356	7054/4842/3458/5578/134/1813/4846	7
GO:0045786	negative regulation of cell cycle	11/140	499/16655	0.00817669	5743/836/5925/7153/596/3458/595/7157/3576/983/1017	11
GO:0045861	negative regulation of proteolysis	9/140	359/16655	0.00832426	3569/207/332/4318/7157/841/7422/6714/3630	9
GO:0002090	regulation of receptor internalization	3/140	36/16655	0.00839251	6401/7422/1813	3
GO:0045773	positive regulation of axon extension	3/140	36/16655	0.00839251	4137/2932/7422	3
GO:0070423	nucleotide-binding oligomerization domain containing signaling pathway	3/140	36/16655	0.00839251	5970/4792/841	3
GO:0002821	positive regulation of adaptive immune response	4/140	74/16655	0.00864144	7124/3458/3565/3553	4
GO:0010810	regulation of cell-substrate adhesion	6/140	174/16655	0.00874061	596/2932/5328/246/7422/6714	6
GO:0002819	regulation of adaptive immune response	5/140	121/16655	0.00879941	7124/3458/3565/3553/246	5
GO:0055088	lipid homeostasis	5/140	121/16655	0.00879941	5468/19/6721/3630/4023	5
GO:0007093	mitotic cell cycle checkpoint	6/140	175/16655	0.00890606	5925/7153/595/7157/983/1017	6
GO:0030819	positive regulation of cAMP biosynthetic process	4/140	75/16655	0.00890606	5733/19/5578/2641	4
GO:0010611	regulation of cardiac muscle hypertrophy	3/140	37/16655	0.00890606	142/2932/5578	3
GO:0010765	positive regulation of sodium ion transport	3/140	37/16655	0.00890606	207/4842/1815	3
GO:0030212	hyaluronan metabolic process	3/140	37/16655	0.00890606	207/3553/4790	3
GO:0045022	early endosome to late endosome transport	3/140	37/16655	0.00890606	5594/5595/6714	3
GO:0045824	negative regulation of innate immune response	3/140	37/16655	0.00890606	5468/3630/1813	3
GO:0061028	establishment of endothelial barrier	3/140	37/16655	0.00890606	7124/3383/3553	3
GO:0061098	positive regulation of protein tyrosine kinase activity	3/140	37/16655	0.00890606	5770/134/152	3
GO:0001780	neutrophil homeostasis	2/140	11/16655	0.00890606	3569/3458	2
GO:0014041	regulation of neuron maturation	2/140	11/16655	0.00890606	596/2932	2
GO:0016114	terpenoid biosynthetic process	2/140	11/16655	0.00890606	1543/8644	2
GO:0017014	protein nitrosylation	2/140	11/16655	0.00890606	4842/4843	2
GO:0018119	peptidyl-cysteine S-nitrosylation	2/140	11/16655	0.00890606	4842/4843	2
GO:0032222	regulation of synaptic transmission, cholinergic	2/140	11/16655	0.00890606	43/3458	2
GO:0032429	regulation of phospholipase A2 activity	2/140	11/16655	0.00890606	5319/1956	2
GO:0033127	regulation of histone phosphorylation	2/140	11/16655	0.00890606	3553/5595	2
GO:0033160	positive regulation of protein import into nucleus, translocation	2/140	11/16655	0.00890606	3569/983	2
GO:0045741	positive regulation of epidermal growth factor-activated receptor activity	2/140	11/16655	0.00890606	134/152	2
GO:0048241	epinephrine transport	2/140	11/16655	0.00890606	5742/152	2
GO:0048245	eosinophil chemotaxis	2/140	11/16655	0.00890606	3565/3269	2
GO:0051481	negative regulation of cytosolic calcium ion concentration	2/140	11/16655	0.00890606	4842/1813	2
GO:0060992	response to fungicide	2/140	11/16655	0.00890606	7389/3091	2
GO:0070431	nucleotide-binding oligomerization domain containing 2 signaling pathway	2/140	11/16655	0.00890606	5970/4792	2
GO:1901550	regulation of endothelial cell development	2/140	11/16655	0.00890606	7124/3553	2
GO:1903140	regulation of establishment of endothelial barrier	2/140	11/16655	0.00890606	7124/3553	2
GO:2000121	regulation of removal of superoxide radicals	2/140	11/16655	0.00890606	7124/4780	2
GO:0016569	covalent chromatin modification	10/140	436/16655	0.00922539	4842/3553/7157/5578/983/7422/5595/5599/1017/2641	10
GO:0002444	myeloid leukocyte mediated immunity	4/140	76/16655	0.00930332	3569/3565/3162/5319	4
GO:0045069	regulation of viral genome replication	4/140	76/16655	0.00930332	7124/7153/596/3576	4
GO:0043123	positive regulation of I-kappaB kinase/NF-kappaB signaling	6/140	178/16655	0.00953632	5743/5970/7124/3553/3162/841	6
GO:0010799	regulation of peptidyl-threonine phosphorylation	3/140	38/16655	0.00953632	2932/5594/2641	3
GO:0033574	response to testosterone	3/140	38/16655	0.00953632	768/2100/3643	3
GO:0071825	protein-lipid complex subunit organization	3/140	38/16655	0.00953632	4353/19/4023	3
GO:0034767	positive regulation of ion transmembrane transport	5/140	124/16655	0.00953632	4842/6347/581/1815/2641	5
GO:0050671	positive regulation of lymphocyte proliferation	5/140	124/16655	0.00953632	3569/596/3458/3565/3553	5
GO:0048259	regulation of receptor-mediated endocytosis	4/140	77/16655	0.00970491	6401/7422/6714/1813	4
GO:0051099	positive regulation of binding	5/140	125/16655	0.00985479	142/4318/2932/5444/2641	5
GO:0010951	negative regulation of endopeptidase activity	7/140	239/16655	0.00987399	3569/207/332/4318/841/7422/6714	7
GO:0021700	developmental maturation	7/140	239/16655	0.00987399	5925/596/5468/4313/2932/3091/7422	7
GO:0006732	coenzyme metabolic process	8/140	303/16655	0.00989703	5743/3156/2194/7157/5465/3091/3643/3630	8

## Sheet: Table S7
Table S7 Enrichment analysis for CC ontology
ID	Description	GeneRatio	BgRatio	p.adjust	geneID	Count
GO:0045121	membrane raft	17/140	287/17839	1.58087e-08	5743/836/7124/3383/4842/6401/3162/19/841/2932/3932/5594/1956/3643/5595/6714/4846	17
GO:0098857	membrane microdomain	17/140	288/17839	1.58087e-08	5743/836/7124/3383/4842/6401/3162/19/841/2932/3932/5594/1956/3643/5595/6714/4846	17
GO:0005901	caveola	9/140	76/17839	7.44826e-07	5743/4842/6401/3162/5594/3643/5595/6714/4846	9
GO:0044853	plasma membrane raft	9/140	86/17839	1.68753e-06	5743/4842/6401/3162/5594/3643/5595/6714/4846	9
GO:0044297	cell body	16/140	492/17839	9.09692e-05	2099/5733/4137/7054/3756/6347/1728/841/2932/5578/1312/5594/2100/134/1813/1815	16
GO:0030424	axon	14/140	428/17839	0.000330524	2099/4137/7054/3756/6347/2932/760/3091/1312/5594/134/152/1813/1815	14
GO:0098552	side of membrane	14/140	447/17839	0.000462758	3569/7124/7054/3383/3458/3565/5770/19/2322/3932/246/762/6714/2152	14
GO:0043025	neuronal cell body	13/140	435/17839	0.00137231	2099/5733/7054/3756/6347/1728/2932/5578/5594/2100/134/1813/1815	13
GO:0043679	axon terminus	7/140	121/17839	0.00147687	2099/7054/6347/134/152/1813/1815	7
GO:0030425	dendrite	13/140	453/17839	0.0016615	4137/7054/4842/3756/6347/240/2932/5578/1312/5594/134/1813/1815	13
GO:0044306	neuron projection terminus	7/140	133/17839	0.00220208	2099/7054/6347/134/152/1813/1815	7
GO:0005667	transcription factor complex	10/140	297/17839	0.0028115	5970/5925/142/5468/3725/7157/2353/3091/196/1017	10
GO:0043204	perikaryon	6/140	100/17839	0.00295233	2099/7054/6347/5594/2100/1813	6
GO:0033267	axon part	8/140	198/17839	0.0034334	2099/7054/3756/6347/134/152/1813/1815	8
GO:0009897	external side of plasma membrane	9/140	260/17839	0.00403119	3569/7124/3383/3458/3565/19/2322/762/2152	9
GO:0030141	secretory granule	10/140	329/17839	0.0048186	4842/3553/4353/5319/762/7422/213/3630/1813/2641	10
GO:0043197	dendritic spine	6/140	120/17839	0.00595055	4842/2932/1312/134/1813/1815	6
GO:0005635	nuclear envelope	11/140	410/17839	0.00595055	5733/4842/596/3756/142/240/581/5742/590/1956/5595	11
GO:0044309	neuron spine	6/140	122/17839	0.00595055	4842/2932/1312/134/1813/1815	6
GO:0031983	vesicle lumen	5/140	85/17839	0.00771978	7422/1956/213/3630/2641	5
GO:0099503	secretory vesicle	11/140	440/17839	0.00950872	7054/4842/3553/4353/5319/762/7422/213/3630/1813/2641	11

## Sheet: Table S8
Table S8 Results of network module analysis
ID	Size	GeneID	SYMBOL	CoreGenes	ExpandedGenes	ColitisScore	DMScore	GCScore
M1	4	84993,7347,5320,9406	UBL7,UCHL3,PLA2G2A,ZRANB2		UBL7,UCHL3,PLA2G2A,ZRANB2	0.0126038	0.00644451	0.0844118
M2	4	4314,6354,6347,1232	MMP3,CCL7,CCL2,CCR3	CCL2	MMP3,CCL7,CCR3	0.376028	0.114283	0.00460437
M3	4	7498,7347,84993,9406	XDH,UCHL3,UBL7,ZRANB2	XDH	UCHL3,UBL7,ZRANB2	0.00798502	0.00490658	0.0840453
M4	4	7347,84993,9406,5268	UCHL3,UBL7,ZRANB2,SERPINB5		UCHL3,UBL7,ZRANB2,SERPINB5	0.00981081	0.0059418	0.115698
M5	4	7392,51806,6318,54575	USF2,CALML5,SERPINB4,UGT1A10	UGT1A10	USF2,CALML5,SERPINB4	0.00395924	0.00595961	0.0053075
M6	4	7347,9406,84993,164	UCHL3,ZRANB2,UBL7,AP1G1		UCHL3,ZRANB2,UBL7,AP1G1	0.0203031	0.00632723	0.0868599
M7	4	1278,231,6462,6652	COL1A2,AKR1B1,SHBG,SORD	AKR1B1	COL1A2,SHBG,SORD	0.0572812	2.4917	0.0367431
M8	4	231,6462,6652,6917	AKR1B1,SHBG,SORD,TCEA1	AKR1B1	SHBG,SORD,TCEA1	0.00438131	2.47929	0.0365487
M9	4	9855,6755,5174,5830	FARP2,SSTR5,PDZK1,PEX5		FARP2,SSTR5,PDZK1,PEX5	0.525876	0.0223397	0.00614828
M10	4	563,231,6462,6652	AZGP1,AKR1B1,SHBG,SORD	AKR1B1	AZGP1,SHBG,SORD	0.00354787	2.48078	0.0355289
M11	4	23216,4225,2641,4224	TBC1D1,MEP1B,GCG,MEP1A	GCG	TBC1D1,MEP1B,MEP1A	0.134656	0.448145	0.15713
M12	4	5155,1282,1284,5008	PDGFB,COL4A1,COL4A2,OSM		PDGFB,COL4A1,COL4A2,OSM	0.405572	0.00473086	0.00425168
M13	4	5081,231,6652,6462	PAX7,AKR1B1,SORD,SHBG	AKR1B1	PAX7,SORD,SHBG	0.00468074	2.50623	0.0356955
M14	4	1278,1280,5155,633	COL1A2,COL2A1,PDGFB,BGN		COL1A2,COL2A1,PDGFB,BGN	0.0780363	0.0239888	0.00816914
M15	4	2642,4225,2641,4224	GCGR,MEP1B,GCG,MEP1A	GCG	GCGR,MEP1B,MEP1A	0.13443	2.29172	0.156915
M16	4	5997,4792,7052,801	RGS2,NFKBIA,TGM2,CALM1	NFKBIA	RGS2,TGM2,CALM1	0.320775	0.208018	0.242592
M17	4	7052,801,9146,4087	TGM2,CALM1,HGS,SMAD2		TGM2,CALM1,HGS,SMAD2	0.0792467	0.318473	0.287729
M18	4	5879,5159,4690,5747	RAC1,PDGFRB,NCK1,PTK2		RAC1,PDGFRB,NCK1,PTK2	0.215371	0.127648	0.240036
M19	4	3458,3460,3459,5879	IFNG,IFNGR2,IFNGR1,RAC1	IFNG	IFNGR2,IFNGR1,RAC1	0.0361959	0.0207081	0.0557029
M20	4	2316,7532,8471,83987	FLNA,YWHAG,IRS4,CCDC8		FLNA,YWHAG,IRS4,CCDC8	0.18241	0.317093	0.212031
M21	4	4792,1457,801,4087	NFKBIA,CSNK2A1,CALM1,SMAD2	NFKBIA	CSNK2A1,CALM1,SMAD2	0.364536	0.204768	0.289607
M22	4	3313,1457,3014,4792	HSPA9,CSNK2A1,H2AFX,NFKBIA	NFKBIA	HSPA9,CSNK2A1,H2AFX	0.33791	0.128111	0.170257
M23	4	5159,4690,5979,5747	PDGFRB,NCK1,RET,PTK2		PDGFRB,NCK1,RET,PTK2	0.202744	0.117243	0.198408
M24	4	4771,5170,5829,2185	NF2,PDPK1,PXN,PTK2B		NF2,PDPK1,PXN,PTK2B	0.0403598	0.0587014	0.138465
M25	4	5170,5829,2185,1742	PDPK1,PXN,PTK2B,DLG4		PDPK1,PXN,PTK2B,DLG4	0.236481	0.0547964	0.217637
M26	4	3265,55914,6500,8945	HRAS,ERBIN,SKP1,BTRC		HRAS,ERBIN,SKP1,BTRC	0.0735093	0.0713602	0.280632
M27	4	2318,6160,6193,6201	FLNC,RPL31,RPS5,RPS7		FLNC,RPL31,RPS5,RPS7	0.0547397	0.0330658	0.0361446
M28	4	6500,7321,7332,4734	SKP1,UBE2D1,UBE2L3,NEDD4		SKP1,UBE2D1,UBE2L3,NEDD4	0.0687253	0.0497837	0.157271
M29	4	9368,4163,1892,31	SLC9A3R1,MCC,ECHS1,ACACA		SLC9A3R1,MCC,ECHS1,ACACA	0.0250372	0.0703729	0.126769
M30	4	6230,6193,6201,7321	RPS25,RPS5,RPS7,UBE2D1		RPS25,RPS5,RPS7,UBE2D1	0.0626706	0.0301647	0.0340581
M31	4	1511,2318,4035,1937	CTSG,FLNC,LRP1,EEF1G		CTSG,FLNC,LRP1,EEF1G	0.0382946	0.199078	0.0401561
M32	4	2318,4035,1937,821	FLNC,LRP1,EEF1G,CANX		FLNC,LRP1,EEF1G,CANX	0.0605677	0.250633	0.0461231
M33	4	7186,7321,3308,841	TRAF2,UBE2D1,HSPA4,CASP8	CASP8	TRAF2,UBE2D1,HSPA4	0.49556	0.140542	0.172799
M34	4	637,387,356,1460	BID,RHOA,FASLG,CSNK2B		BID,RHOA,FASLG,CSNK2B	0.0564808	0.0553769	0.191808
M35	4	2932,6595,7186,7321	GSK3B,SMARCA2,TRAF2,UBE2D1	GSK3B	SMARCA2,TRAF2,UBE2D1	0.333303	1.94851	0.113205
M36	4	1029,545,472,1616	CDKN2A,ATR,ATM,DAXX		CDKN2A,ATR,ATM,DAXX	0.0218857	0.11207	0.14228
M37	4	7416,10291,5707,7277	VDAC1,SF3A1,PSMD1,TUBA4A		VDAC1,SF3A1,PSMD1,TUBA4A	0.0438246	0.0289785	0.0478872
M38	4	1432,4772,3329,154	MAPK14,NFATC1,HSPD1,ADRB2	MAPK14	NFATC1,HSPD1,ADRB2	0.307864	0.414855	0.259775
M39	4	5467,8204,23013,604	PPARD,NRIP1,SPEN,BCL6	PPARD	NRIP1,SPEN,BCL6	0.00863454	1.92301	0.0166646
M40	4	8668,5467,604,23013	EIF3I,PPARD,BCL6,SPEN	PPARD	EIF3I,BCL6,SPEN	0.0270592	1.92071	0.0168585
M41	4	4297,8290,23468,1487	KMT2A,HIST3H3,CBX5,CTBP1		KMT2A,HIST3H3,CBX5,CTBP1	0.0291188	0.0749944	0.0582776
M42	4	142,5451,6776,9612	PARP1,POU2F1,STAT5A,NCOR2	PARP1	POU2F1,STAT5A,NCOR2	0.0559252	0.196458	6.61284
M43	4	3702,5588,695,7409	ITK,PRKCQ,BTK,VAV1		ITK,PRKCQ,BTK,VAV1	0.0190284	0.029421	0.0983122
M44	4	5588,695,7409,3297	PRKCQ,BTK,VAV1,HSF1		PRKCQ,BTK,VAV1,HSF1	0.0192764	0.0406438	0.0734077
M45	4	3956,3791,5921,5795	LGALS1,KDR,RASA1,PTPRJ		LGALS1,KDR,RASA1,PTPRJ	0.0289446	0.0479862	6.71885
M46	4	3791,5921,5795,2322	KDR,RASA1,PTPRJ,FLT3	FLT3	KDR,RASA1,PTPRJ	0.0236923	0.0557301	6.68811
M47	4	8663,6223,5610,4691	EIF3C,RPS19,EIF2AK2,NCL		EIF3C,RPS19,EIF2AK2,NCL	0.389236	0.12343	0.0712126
M48	4	6223,5610,4691,1432	RPS19,EIF2AK2,NCL,MAPK14	MAPK14	RPS19,EIF2AK2,NCL	0.373211	0.169874	0.149477
M49	4	3980,7023,7024,7520	LIG3,TFAP4,TFCP2,XRCC5		LIG3,TFAP4,TFCP2,XRCC5	0.0396248	0.0844275	0.0859752
M50	4	7023,7024,7520,4691	TFAP4,TFCP2,XRCC5,NCL		TFAP4,TFCP2,XRCC5,NCL	0.354517	0.100008	0.111909
M51	4	7297,7409,5777,919	TYK2,VAV1,PTPN6,CD247		TYK2,VAV1,PTPN6,CD247	0.227147	0.0826905	0.0905829
M52	4	9402,29110,10318,7187	GRAP2,TBK1,TNIP1,TRAF3		GRAP2,TBK1,TNIP1,TRAF3	0.303946	0.0272805	0.0738898
M53	4	55611,7187,29110,10318	OTUB1,TRAF3,TBK1,TNIP1		OTUB1,TRAF3,TBK1,TNIP1	0.305951	0.0234605	0.0926404
M54	4	6722,3159,983,5036	SRF,HMGA1,CDK1,PA2G4	CDK1	SRF,HMGA1,PA2G4	0.0394974	1.95289	0.0904716
M55	4	386675,386682,5300,526	KRTAP10-7,KRTAP10-3,PIN1,ATP6V1B2		KRTAP10-7,KRTAP10-3,PIN1,ATP6V1B2	0.433615	0.28258	0.0566022
M56	4	5093,81631,10075,8266	PCBP1,MAP1LC3B,HUWE1,UBL4A		PCBP1,MAP1LC3B,HUWE1,UBL4A	0.0441709	0.0636772	0.203823
M57	4	386675,386682,5300,839	KRTAP10-7,KRTAP10-3,PIN1,CASP6		KRTAP10-7,KRTAP10-3,PIN1,CASP6	0.332872	0.281162	0.10359
M58	4	4846,348,6767,3728	NOS3,APOE,ST13,JUP	NOS3	APOE,ST13,JUP	0.0290749	0.0491345	0.0543986
M59	4	5531,51141,7917,1832	PPP4C,INSIG2,BAG6,DSP		PPP4C,INSIG2,BAG6,DSP	0.0228129	0.114406	0.0568421
M60	4	3609,8266,26270,5034	ILF3,UBL4A,FBXO6,P4HB		ILF3,UBL4A,FBXO6,P4HB	0.667575	0.242829	0.294831
M61	4	5359,386675,388677,386682	PLSCR1,KRTAP10-7,NOTCH2NL,KRTAP10-3		PLSCR1,KRTAP10-7,NOTCH2NL,KRTAP10-3	0.533131	0.291361	0.0175472
M62	4	386675,386682,388677,5682	KRTAP10-7,KRTAP10-3,NOTCH2NL,PSMA1		KRTAP10-7,KRTAP10-3,NOTCH2NL,PSMA1	0.537306	0.291778	0.0314478
M63	4	51141,7376,11124,7917	INSIG2,NR1H2,FAF1,BAG6		INSIG2,NR1H2,FAF1,BAG6	0.111878	0.130218	0.0134441
M64	4	7376,11124,7917,8772	NR1H2,FAF1,BAG6,FADD		NR1H2,FAF1,BAG6,FADD	0.130253	0.108264	0.0622661
M65	4	55072,8767,332,329	RNF31,RIPK2,BIRC5,BIRC2	BIRC5	RNF31,RIPK2,BIRC2	0.0667392	0.0346815	0.0663205
M66	4	22983,9588,7001,22976	MAST1,PRDX6,PRDX2,PAXIP1		MAST1,PRDX6,PRDX2,PAXIP1	0.020489	0.0411219	0.0635764
M67	4	10527,1434,3838,768	IPO7,CSE1L,KPNA2,CA9	CA9	IPO7,CSE1L,KPNA2	0.0427789	0.165292	0.0445877
M68	4	57510,1434,3838,768	XPO5,CSE1L,KPNA2,CA9	CA9	XPO5,CSE1L,KPNA2	0.0463405	0.164024	0.0440723
M69	4	10397,54732,1314,9276	NDRG1,TMED9,COPA,COPB2		NDRG1,TMED9,COPA,COPB2	0.0122503	0.0356946	0.029303
M70	4	54732,1314,9276,80700	TMED9,COPA,COPB2,UBXN6		TMED9,COPA,COPB2,UBXN6	0.110576	0.040306	0.0129267
M71	4	3107,51377,5687,5710	HLA-C,UCHL5,PSMA6,PSMD4		HLA-C,UCHL5,PSMA6,PSMD4	0.0589569	0.0618506	0.0331296
M72	4	5710,51377,5687,2035	PSMD4,UCHL5,PSMA6,EPB41		PSMD4,UCHL5,PSMA6,EPB41	0.0625015	0.0379129	0.0384017
M73	4	51608,3156,23197,5708	GET4,HMGCR,FAF2,PSMD2	HMGCR	GET4,FAF2,PSMD2	0.131201	0.115925	0.0295376
M74	4	1314,54732,9276,373156	COPA,TMED9,COPB2,GSTK1		COPA,TMED9,COPB2,GSTK1	0.0156724	0.0499606	0.016124
M75	5	59349,1815,3763,3765,3760	KLHL12,DRD4,KCNJ6,KCNJ9,KCNJ3	DRD4	KLHL12,KCNJ6,KCNJ9,KCNJ3	0.00291293	0.251896	0.00225526
M76	5	3598,3597,3566,3565,3561	IL13RA2,IL13RA1,IL4R,IL4,IL2RG	IL4	IL13RA2,IL13RA1,IL4R,IL2RG	11.0927	0.0289438	0.0319013
M77	5	152,1967,8890,8892,8893	ADRA2C,EIF2B1,EIF2B4,EIF2B2,EIF2B5	ADRA2C	EIF2B1,EIF2B4,EIF2B2,EIF2B5	0.0048224	0.00503993	0.00963853
M78	5	26286,3576,3490,6382,6352	ARFGAP3,CXCL8,IGFBP7,SDC1,CCL5	CXCL8	ARFGAP3,IGFBP7,SDC1,CCL5	0.335523	0.120372	0.0711856
M79	5	3576,3490,6382,6352,1232	CXCL8,IGFBP7,SDC1,CCL5,CCR3	CXCL8	IGFBP7,SDC1,CCL5,CCR3	0.602769	0.139553	0.0709238
M80	5	858,1812,135,134,100	CAV2,DRD1,ADORA2A,ADORA1,ADA	ADORA1	CAV2,DRD1,ADORA2A,ADA	0.233916	1.62275	0.00536134
M81	5	1812,135,134,100,1803	DRD1,ADORA2A,ADORA1,ADA,DPP4	ADORA1	DRD1,ADORA2A,ADA,DPP4	0.275295	3.22904	0.0639649
M82	5	1528,54577,54600,54576,54657	CYB5A,UGT1A7,UGT1A9,UGT1A8,UGT1A4	UGT1A7,UGT1A9,UGT1A8,UGT1A4	CYB5A	0.000388974	0.000457618	0.000831924
M83	5	51143,5867,9135,27342,164	DYNC1LI1,RAB4A,RABEP1,RABGEF1,AP1G1		DYNC1LI1,RAB4A,RABEP1,RABGEF1,AP1G1	0.0134579	0.00734506	0.00996367
M84	5	5867,9135,27342,164,84993	RAB4A,RABEP1,RABGEF1,AP1G1,UBL7		RAB4A,RABEP1,RABGEF1,AP1G1,UBL7	0.0139309	0.00746416	0.00881854
M85	5	847,219743,6755,5174,5830	CAT,TYSND1,SSTR5,PDZK1,PEX5	CAT	TYSND1,SSTR5,PDZK1,PEX5	0.417136	0.023265	0.0055798
M86	5	10526,1645,1109,8644,1646	IPO8,AKR1C1,AKR1C4,AKR1C3,AKR1C2	AKR1C3	IPO8,AKR1C1,AKR1C4,AKR1C2	0.000911307	0.00161211	0.0036118
M87	5	8907,164,9135,5867,27342	AP1M1,AP1G1,RABEP1,RAB4A,RABGEF1		AP1M1,AP1G1,RABEP1,RAB4A,RABGEF1	0.0205202	0.0311579	0.0104458
M88	5	8671,6508,6521,762,760	SLC4A4,SLC4A3,SLC4A1,CA4,CA2	CA4,CA2	SLC4A4,SLC4A3,SLC4A1	0.00200252	0.00642469	0.00224275
M89	5	5553,5550,4224,183,3827	PRG2,PREP,MEP1A,AGT,KNG1	PREP	PRG2,MEP1A,AGT,KNG1	0.0635464	0.0454966	0.0689786
M90	5	5020,5550,4224,3827,183	OXT,PREP,MEP1A,KNG1,AGT	PREP	OXT,MEP1A,KNG1,AGT	0.0562545	0.0442088	0.0684766
M91	5	2641,4224,5550,3827,183	GCG,MEP1A,PREP,KNG1,AGT	GCG,PREP	MEP1A,KNG1,AGT	0.0608518	0.32263	0.0708402
M92	5	83987,5501,4869,506,5499	CCDC8,PPP1CC,NPM1,ATP5B,PPP1CA		CCDC8,PPP1CC,NPM1,ATP5B,PPP1CA	0.0729339	0.0975859	0.251689
M93	5	4771,4086,5058,2064,367	NF2,SMAD1,PAK1,ERBB2,AR		NF2,SMAD1,PAK1,ERBB2,AR	0.158408	0.131436	5.3954
M94	5	7052,801,7046,4086,4087	TGM2,CALM1,TGFBR1,SMAD1,SMAD2		TGM2,CALM1,TGFBR1,SMAD1,SMAD2	0.066504	0.214567	0.279697
M95	5	9111,9146,7046,4089,4086	NMI,HGS,TGFBR1,SMAD4,SMAD1		NMI,HGS,TGFBR1,SMAD4,SMAD1	0.0303317	0.158433	0.210095
M96	5	5997,8655,4792,1457,801	RGS2,DYNLL1,NFKBIA,CSNK2A1,CALM1	NFKBIA	RGS2,DYNLL1,CSNK2A1,CALM1	0.28116	0.14769	0.251923
M97	5	22938,7046,4089,4086,9146	SNW1,TGFBR1,SMAD4,SMAD1,HGS		SNW1,TGFBR1,SMAD4,SMAD1,HGS	0.0428588	0.172982	0.227397
M98	5	4086,7046,4089,88,55914	SMAD1,TGFBR1,SMAD4,ACTN2,ERBIN		SMAD1,TGFBR1,SMAD4,ACTN2,ERBIN	0.024129	0.0842673	0.160015
M99	5	207,1742,2185,5578,6714	AKT1,DLG4,PTK2B,PRKCA,SRC	AKT1,PRKCA,SRC	DLG4,PTK2B	1.27928	0.40744	0.316677
M100	5	1742,2185,5578,6714,8452	DLG4,PTK2B,PRKCA,SRC,CUL3	PRKCA,SRC	DLG4,PTK2B,CUL3	1.17	0.339418	0.296993
M101	5	4771,9146,7046,4089,4086	NF2,HGS,TGFBR1,SMAD4,SMAD1		NF2,HGS,TGFBR1,SMAD4,SMAD1	0.0328099	0.164579	0.195125
M102	5	1742,5578,6714,10657,8452	DLG4,PRKCA,SRC,KHDRBS1,CUL3	PRKCA,SRC	DLG4,KHDRBS1,CUL3	1.17103	0.336262	0.260115
M103	5	3265,7046,4087,9146,4089	HRAS,TGFBR1,SMAD2,HGS,SMAD4		HRAS,TGFBR1,SMAD2,HGS,SMAD4	0.0477265	0.163988	0.252754
M104	5	5594,3312,4067,5580,7534	MAPK1,HSPA8,LYN,PRKCD,YWHAZ	MAPK1	HSPA8,LYN,PRKCD,YWHAZ	0.27403	0.38608	0.390478
M105	5	60,1915,7412,2521,4343	ACTB,EEF1A1,VCAM1,FUS,MOV10		ACTB,EEF1A1,VCAM1,FUS,MOV10	0.452247	0.266864	0.270218
M106	5	6230,6201,6193,6160,9641	RPS25,RPS7,RPS5,RPL31,IKBKE		RPS25,RPS7,RPS5,RPL31,IKBKE	0.0698399	0.0589281	0.118078
M107	5	5170,868,2185,5829,6850	PDPK1,CBLB,PTK2B,PXN,SYK		PDPK1,CBLB,PTK2B,PXN,SYK	0.040391	0.0665272	0.138197
M108	5	88,87,7273,3265,55914	ACTN2,ACTN1,TTN,HRAS,ERBIN		ACTN2,ACTN1,TTN,HRAS,ERBIN	0.0289666	0.147757	0.179898
M109	5	6160,6193,6201,3646,6230	RPL31,RPS5,RPS7,EIF3E,RPS25		RPL31,RPS5,RPS7,EIF3E,RPS25	0.0810731	0.0327734	0.0303805
M110	5	999,4609,1499,2932,4904	CDH1,MYC,CTNNB1,GSK3B,YBX1	GSK3B	CDH1,MYC,CTNNB1,YBX1	0.267767	1.81007	5.65157
M111	5	1234,2185,868,6850,5781	CCR5,PTK2B,CBLB,SYK,PTPN11		CCR5,PTK2B,CBLB,SYK,PTPN11	0.162818	1.60208	0.14104
M112	5	2185,868,6850,5781,8651	PTK2B,CBLB,SYK,PTPN11,SOCS1		PTK2B,CBLB,SYK,PTPN11,SOCS1	0.162044	0.13338	0.161778
M113	5	1499,64750,2932,4904,6045	CTNNB1,SMURF2,GSK3B,YBX1,RNF2	GSK3B	CTNNB1,SMURF2,YBX1,RNF2	0.0981414	1.64195	0.319559
M114	5	64750,2932,4904,6045,3315	SMURF2,GSK3B,YBX1,RNF2,HSPB1	GSK3B	SMURF2,YBX1,RNF2,HSPB1	0.266612	1.60408	0.216821
M115	5	920,1234,2185,868,6850	CD4,CCR5,PTK2B,CBLB,SYK		CD4,CCR5,PTK2B,CBLB,SYK	0.0320288	1.618	0.0929082
M116	5	2185,868,6850,5781,2549	PTK2B,CBLB,SYK,PTPN11,GAB1		PTK2B,CBLB,SYK,PTPN11,GAB1	0.162283	0.124816	0.163038
M117	5	7186,292,841,5071,7321	TRAF2,SLC25A5,CASP8,PRKN,UBE2D1	CASP8	TRAF2,SLC25A5,PRKN,UBE2D1	0.480111	0.103246	0.130604
M118	5	9924,6201,1937,6193,8878	PAN2,RPS7,EEF1G,RPS5,SQSTM1		PAN2,RPS7,EEF1G,RPS5,SQSTM1	0.0790913	0.117498	0.0699197
M119	5	64750,4904,6045,3315,10537	SMURF2,YBX1,RNF2,HSPB1,UBD		SMURF2,YBX1,RNF2,HSPB1,UBD	0.245992	0.169847	0.217008
M120	5	2801,23028,8841,166,6774	GOLGA2,KDM1A,HDAC3,AES,STAT3		GOLGA2,KDM1A,HDAC3,AES,STAT3	0.0883662	0.182218	0.196713
M121	5	356,598,1029,637,841	FASLG,BCL2L1,CDKN2A,BID,CASP8	CASP8	FASLG,BCL2L1,CDKN2A,BID	0.187748	0.0626334	0.200603
M122	5	672,10856,2335,142,9768	BRCA1,RUVBL2,FN1,PARP1,PCLAF	PARP1	BRCA1,RUVBL2,FN1,PCLAF	0.247348	0.264986	5.4459
M123	5	604,9611,9759,2010,3725	BCL6,NCOR1,HDAC4,EMD,JUN	JUN	BCL6,NCOR1,HDAC4,EMD	0.0509213	0.14044	0.0678027
M124	5	2335,9768,3932,3326,3178	FN1,PCLAF,LCK,HSP90AB1,HNRNPA1	LCK	FN1,PCLAF,HSP90AB1,HNRNPA1	0.235305	0.352439	0.346848
M125	5	3791,5921,5795,23291,2690	KDR,RASA1,PTPRJ,FBXW11,GHR		KDR,RASA1,PTPRJ,FBXW11,GHR	0.0479298	0.0794402	5.39412
M126	5	3020,3980,6117,409,7520	H3F3A,LIG3,RPA1,ARRB2,XRCC5		H3F3A,LIG3,RPA1,ARRB2,XRCC5	0.146552	0.128827	0.242478
M127	5	6897,7360,22827,5093,5034	TARS,UGP2,PUF60,PCBP1,P4HB		TARS,UGP2,PUF60,PCBP1,P4HB	0.0197958	0.0451303	0.0537876
M128	5	10075,26270,3611,6189,51547	HUWE1,FBXO6,ILK,RPS3A,SIRT7		HUWE1,FBXO6,ILK,RPS3A,SIRT7	0.586919	0.241627	0.388288
M129	5	81,348,6767,4846,213	ACTN4,APOE,ST13,NOS3,ALB	NOS3,ALB	ACTN4,APOE,ST13	0.0409109	0.0735213	0.104657
M130	5	6767,348,2,3337,4846	ST13,APOE,A2M,DNAJB1,NOS3	NOS3	ST13,APOE,A2M,DNAJB1	0.196444	0.2965	0.0980832
M131	5	4924,2775,8601,4905,2773	NUCB1,GNAO1,RGS20,NSF,GNAI3		NUCB1,GNAO1,RGS20,NSF,GNAI3	0.244616	0.149196	0.0790826
M132	5	2775,1813,4905,8601,2773	GNAO1,DRD2,NSF,RGS20,GNAI3	DRD2	GNAO1,NSF,RGS20,GNAI3	0.0179098	0.264498	0.0784962
M133	5	682,3156,550,10956,84447	BSG,HMGCR,AUP1,OS9,SYVN1	HMGCR	BSG,AUP1,OS9,SYVN1	0.0617848	0.0634755	0.0129335
M134	5	3156,550,5447,80700,84447	HMGCR,AUP1,POR,UBXN6,SYVN1	HMGCR	AUP1,POR,UBXN6,SYVN1	0.106956	0.0541657	0.00763602
M135	5	1434,3838,768,11160,58477	CSE1L,KPNA2,CA9,ERLIN2,SRPRB	CA9	CSE1L,KPNA2,ERLIN2,SRPRB	0.0396364	0.168472	0.0435108
M136	5	51608,10956,550,3156,23197	GET4,OS9,AUP1,HMGCR,FAF2	HMGCR	GET4,OS9,AUP1,FAF2	0.0906694	0.0184163	0.0166114
M137	5	5447,3156,11160,58477,84447	POR,HMGCR,ERLIN2,SRPRB,SYVN1	HMGCR	POR,ERLIN2,SRPRB,SYVN1	0.0307954	0.0834834	0.0154299
M138	5	2035,811,3107,5687,22919	EPB41,CALR,HLA-C,PSMA6,MAPRE1		EPB41,CALR,HLA-C,PSMA6,MAPRE1	0.0348532	0.0652592	0.0311526
M139	5	51608,9817,10542,57562,114928	GET4,KEAP1,LAMTOR5,CEP126,GPRASP2		GET4,KEAP1,LAMTOR5,CEP126,GPRASP2	1.60444	0.0192202	0.0698506
M140	5	768,58477,11160,3156,84447	CA9,SRPRB,ERLIN2,HMGCR,SYVN1	CA9,HMGCR	SRPRB,ERLIN2,SYVN1	0.0492176	0.0874475	0.0245594
M141	6	2152,1967,8890,8892,23673,8893	F3,EIF2B1,EIF2B4,EIF2B2,STX12,EIF2B5	F3	EIF2B1,EIF2B4,EIF2B2,STX12,EIF2B5	0.0207024	0.00625002	0.00971696
M142	6	5159,4690,5747,367,2064,5335	PDGFRB,NCK1,PTK2,AR,ERBB2,PLCG1		PDGFRB,NCK1,PTK2,AR,ERBB2,PLCG1	0.260279	0.172942	4.58973
M143	6	5747,367,2064,5335,4089,857	PTK2,AR,ERBB2,PLCG1,SMAD4,CAV1		PTK2,AR,ERBB2,PLCG1,SMAD4,CAV1	0.38505	1.42146	4.5721
M144	6	5335,4089,857,5499,3643,5594	PLCG1,SMAD4,CAV1,PPP1CA,INSR,MAPK1	INSR,MAPK1	PLCG1,SMAD4,CAV1,PPP1CA	0.276575	2.71131	0.208238
M145	6	2260,3815,5747,6464,2885,367	FGFR1,KIT,PTK2,SHC1,GRB2,AR		FGFR1,KIT,PTK2,SHC1,GRB2,AR	0.233946	0.201487	0.308478
M146	6	5894,7531,3313,3014,2099,207	RAF1,YWHAE,HSPA9,H2AFX,ESR1,AKT1	ESR1,AKT1	RAF1,YWHAE,HSPA9,H2AFX	0.19058	0.239104	0.263477
M147	6	2099,207,1742,5578,6714,10657	ESR1,AKT1,DLG4,PRKCA,SRC,KHDRBS1	ESR1,AKT1,PRKCA,SRC	DLG4,KHDRBS1	1.09715	0.404729	0.328033
M148	6	64750,2932,4904,6045,10537,3190	SMURF2,GSK3B,YBX1,RNF2,UBD,HNRNPK	GSK3B	SMURF2,YBX1,RNF2,UBD,HNRNPK	0.107268	1.41812	0.228633
M149	6	4904,6045,10537,3190,3065,2146	YBX1,RNF2,UBD,HNRNPK,HDAC1,EZH2		YBX1,RNF2,UBD,HNRNPK,HDAC1,EZH2	0.0898048	0.272239	0.231629
M150	6	598,637,356,387,841,5566	BCL2L1,BID,FASLG,RHOA,CASP8,PRKACA	CASP8	BCL2L1,BID,FASLG,RHOA,PRKACA	0.221115	0.178007	0.205892
M151	6	3190,7874,2146,7428,23411,8726	HNRNPK,USP7,EZH2,VHL,SIRT1,EED		HNRNPK,USP7,EZH2,VHL,SIRT1,EED	0.136597	1.39483	0.120185
M152	6	3065,8841,7428,23411,8726,5970	HDAC1,HDAC3,VHL,SIRT1,EED,RELA	RELA	HDAC1,HDAC3,VHL,SIRT1,EED	0.310343	1.50951	0.52056
M153	6	8648,9611,9759,6256,125115,8202	NCOA1,NCOR1,HDAC4,RXRA,KRT40,NCOA3		NCOA1,NCOR1,HDAC4,RXRA,KRT40,NCOA3	0.0446794	0.144092	0.0303292
M154	6	2353,9611,9759,6256,8648,8202	FOS,NCOR1,HDAC4,RXRA,NCOA1,NCOA3	FOS	NCOR1,HDAC4,RXRA,NCOA1,NCOA3	0.0407062	0.148125	0.0310528
M155	6	6256,8648,8202,125115,3164,5705	RXRA,NCOA1,NCOA3,KRT40,NR4A1,PSMC5		RXRA,NCOA1,NCOA3,KRT40,NR4A1,PSMC5	0.0449855	0.118499	0.0423929
M156	6	3275,2100,6256,8648,3164,2353	PRMT2,ESR2,RXRA,NCOA1,NR4A1,FOS	ESR2,FOS	PRMT2,RXRA,NCOA1,NR4A1	0.122236	0.114763	0.0540584
M157	6	6256,8648,3164,2353,5595,8202	RXRA,NCOA1,NR4A1,FOS,MAPK3,NCOA3	FOS,MAPK3	RXRA,NCOA1,NR4A1,NCOA3	0.019744	0.148471	0.0569662
M158	6	81631,10075,23710,10399,10492,3192	MAP1LC3B,HUWE1,GABARAPL1,RACK1,SYNCRIP,HNRNPU		MAP1LC3B,HUWE1,GABARAPL1,RACK1,SYNCRIP,HNRNPU	0.152199	0.108062	0.165392
M159	6	10075,23710,10399,10492,3192,10987	HUWE1,GABARAPL1,RACK1,SYNCRIP,HNRNPU,COPS5		HUWE1,GABARAPL1,RACK1,SYNCRIP,HNRNPU,COPS5	0.160167	0.124026	0.253405
M160	6	3609,23710,10075,26270,3611,6189	ILF3,GABARAPL1,HUWE1,FBXO6,ILK,RPS3A		ILF3,GABARAPL1,HUWE1,FBXO6,ILK,RPS3A	0.496306	0.243629	0.376194
M161	6	6897,7360,22827,2923,5034,3611	TARS,UGP2,PUF60,PDIA3,P4HB,ILK		TARS,UGP2,PUF60,PDIA3,P4HB,ILK	0.0454138	0.0855385	0.0381922
M162	6	55832,1017,3609,23710,10075,6189	CAND1,CDK2,ILF3,GABARAPL1,HUWE1,RPS3A	CDK2	CAND1,ILF3,GABARAPL1,HUWE1,RPS3A	0.0913547	0.140297	0.413238
M163	6	1488,11269,3500,335,1514,7018	CTBP2,DDX19B,IGHG1,APOA1,CTSL,TF		CTBP2,DDX19B,IGHG1,APOA1,CTSL,TF	0.0476042	0.163903	0.0278979
M164	6	10956,550,3156,11160,23197,58477	OS9,AUP1,HMGCR,ERLIN2,FAF2,SRPRB	HMGCR	OS9,AUP1,ERLIN2,FAF2,SRPRB	0.0804873	0.0465956	0.0221849
M165	6	550,3156,11160,23197,58477,1434	AUP1,HMGCR,ERLIN2,FAF2,SRPRB,CSE1L	HMGCR	AUP1,ERLIN2,FAF2,SRPRB,CSE1L	0.0834868	0.0471447	0.0301547
M166	6	3156,11160,23197,58477,1434,84447	HMGCR,ERLIN2,FAF2,SRPRB,CSE1L,SYVN1	HMGCR	ERLIN2,FAF2,SRPRB,CSE1L,SYVN1	0.0997601	0.0789005	0.0300978
M167	6	10956,550,3156,23197,5708,84447	OS9,AUP1,HMGCR,FAF2,PSMD2,SYVN1	HMGCR	OS9,AUP1,FAF2,PSMD2,SYVN1	0.108639	0.11531	0.024883
M168	7	5159,857,6464,5979,5747,2886,2885	PDGFRB,CAV1,SHC1,RET,PTK2,GRB7,GRB2		PDGFRB,CAV1,SHC1,RET,PTK2,GRB7,GRB2	0.400971	1.23825	0.283449
M169	7	55914,7046,4089,4086,3643,4087,9146	ERBIN,TGFBR1,SMAD4,SMAD1,INSR,SMAD2,HGS	INSR	ERBIN,TGFBR1,SMAD4,SMAD1,SMAD2,HGS	0.0373589	1.2889	0.193951
M170	7	5894,7531,3313,2099,207,5578,6714	RAF1,YWHAE,HSPA9,ESR1,AKT1,PRKCA,SRC	ESR1,AKT1,PRKCA,SRC	RAF1,YWHAE,HSPA9	0.853153	0.39146	0.294515
M171	7	4343,8945,4609,1499,64750,2932,4904	MOV10,BTRC,MYC,CTNNB1,SMURF2,GSK3B,YBX1	GSK3B	MOV10,BTRC,MYC,CTNNB1,SMURF2,YBX1	0.185067	1.38279	0.373149
M172	7	2521,8945,4609,1499,64750,2932,4904	FUS,BTRC,MYC,CTNNB1,SMURF2,GSK3B,YBX1	GSK3B	FUS,BTRC,MYC,CTNNB1,SMURF2,YBX1	0.164193	1.32586	0.357189
M173	7	6045,4790,3065,2146,8841,23411,5970	RNF2,NFKB1,HDAC1,EZH2,HDAC3,SIRT1,RELA	NFKB1,RELA	RNF2,HDAC1,EZH2,HDAC3,SIRT1	0.214572	1.32593	0.495405
M174	7	25920,3308,4790,3065,8841,23411,5970	NELFB,HSPA4,NFKB1,HDAC1,HDAC3,SIRT1,RELA	NFKB1,RELA	NELFB,HSPA4,HDAC1,HDAC3,SIRT1	0.229095	1.3437	0.4461
M175	7	6670,4790,3065,8841,23411,8726,5970	SP3,NFKB1,HDAC1,HDAC3,SIRT1,EED,RELA	NFKB1,RELA	SP3,HDAC1,HDAC3,SIRT1,EED	0.266697	1.31464	0.453374
M176	7	2353,5465,6256,8648,3164,8202,2100	FOS,PPARA,RXRA,NCOA1,NR4A1,NCOA3,ESR2	FOS,PPARA,ESR2	RXRA,NCOA1,NR4A1,NCOA3	0.106819	0.108981	0.0511367
M177	7	5465,6256,8648,3164,8202,2100,596	PPARA,RXRA,NCOA1,NR4A1,NCOA3,ESR2,BCL2	PPARA,ESR2,BCL2	RXRA,NCOA1,NR4A1,NCOA3	0.106861	0.11634	0.0728885
M178	7	2353,3275,5465,2100,6256,8648,8202	FOS,PRMT2,PPARA,ESR2,RXRA,NCOA1,NCOA3	FOS,PPARA,ESR2	PRMT2,RXRA,NCOA1,NCOA3	0.104688	0.113958	0.0363009
M179	7	10912,5465,3275,2100,6256,8648,3164	GADD45G,PPARA,PRMT2,ESR2,RXRA,NCOA1,NR4A1	PPARA,ESR2	GADD45G,PRMT2,RXRA,NCOA1,NR4A1	0.104565	0.0931955	0.0453824
M180	7	23710,10399,10492,3192,10987,708,9820	GABARAPL1,RACK1,SYNCRIP,HNRNPU,COPS5,C1QBP,CUL7		GABARAPL1,RACK1,SYNCRIP,HNRNPU,COPS5,C1QBP,CUL7	0.146673	0.119844	0.203591
M181	7	3275,2100,8648,6256,5465,6885,8202	PRMT2,ESR2,NCOA1,RXRA,PPARA,MAP3K7,NCOA3	ESR2,PPARA	PRMT2,NCOA1,RXRA,MAP3K7,NCOA3	0.11568	0.115785	0.0363813
M182	7	550,3156,23197,5708,84447,58477,11160	AUP1,HMGCR,FAF2,PSMD2,SYVN1,SRPRB,ERLIN2	HMGCR	AUP1,FAF2,PSMD2,SYVN1,SRPRB,ERLIN2	0.0964574	0.124574	0.0263172
M183	8	5493,2125,54577,54600,54576,54657,54658,54575	PPL,EVPL,UGT1A7,UGT1A9,UGT1A8,UGT1A4,UGT1A1,UGT1A10	UGT1A7,UGT1A9,UGT1A8,UGT1A4,UGT1A1,UGT1A10	PPL,EVPL	0.00203077	0.00155148	0.00137497
M184	8	5159,8651,5501,2886,3815,5747,6464,2885	PDGFRB,SOCS1,PPP1CC,GRB7,KIT,PTK2,SHC1,GRB2		PDGFRB,SOCS1,PPP1CC,GRB7,KIT,PTK2,SHC1,GRB2	0.176821	0.165522	0.27694
M185	8	1994,5296,867,6850,5295,5781,25,7529	ELAVL1,PIK3R2,CBL,SYK,PIK3R1,PTPN11,ABL1,YWHAB		ELAVL1,PIK3R2,CBL,SYK,PIK3R1,PTPN11,ABL1,YWHAB	0.584331	0.458513	0.437443
M186	8	5296,867,6850,5295,5781,25,7529,2549	PIK3R2,CBL,SYK,PIK3R1,PTPN11,ABL1,YWHAB,GAB1		PIK3R2,CBL,SYK,PIK3R1,PTPN11,ABL1,YWHAB,GAB1	0.279268	0.31026	0.348301
M187	8	5296,867,6850,5295,5781,25,7529,8878	PIK3R2,CBL,SYK,PIK3R1,PTPN11,ABL1,YWHAB,SQSTM1		PIK3R2,CBL,SYK,PIK3R1,PTPN11,ABL1,YWHAB,SQSTM1	0.300773	0.349523	0.350884
M188	8	10482,7415,3676,60,1915,7412,2521,8945	NXF1,VCP,ITGA4,ACTB,EEF1A1,VCAM1,FUS,BTRC		NXF1,VCP,ITGA4,ACTB,EEF1A1,VCAM1,FUS,BTRC	3.98586	0.25108	0.329971
M189	8	7415,3676,60,1915,7412,2521,8945,4609	VCP,ITGA4,ACTB,EEF1A1,VCAM1,FUS,BTRC,MYC		VCP,ITGA4,ACTB,EEF1A1,VCAM1,FUS,BTRC,MYC	4.02231	0.293866	0.416324
M190	8	1616,6925,6045,3308,4790,3065,8841,5970	DAXX,TCF4,RNF2,HSPA4,NFKB1,HDAC1,HDAC3,RELA	NFKB1,RELA	DAXX,TCF4,RNF2,HSPA4,HDAC1,HDAC3	0.203905	0.305798	0.464326
M191	8	6670,3308,23028,4790,3065,8841,23411,5970	SP3,HSPA4,KDM1A,NFKB1,HDAC1,HDAC3,SIRT1,RELA	NFKB1,RELA	SP3,HSPA4,KDM1A,HDAC1,HDAC3,SIRT1	0.202262	1.19058	0.397078
M192	8	4790,3065,8841,23411,8726,5970,1026,6667	NFKB1,HDAC1,HDAC3,SIRT1,EED,RELA,CDKN1A,SP1	NFKB1,RELA	HDAC1,HDAC3,SIRT1,EED,CDKN1A,SP1	0.309009	1.19293	0.518658
M193	8	10969,1660,8454,11337,55832,1017,3609,23710	EBNA1BP2,DHX9,CUL1,GABARAP,CAND1,CDK2,ILF3,GABARAPL1	CDK2	EBNA1BP2,DHX9,CUL1,GABARAP,CAND1,ILF3,GABARAPL1	0.0735719	0.136468	0.276777
M194	9	3815,5747,6464,2885,367,2064,5159,857,1956	KIT,PTK2,SHC1,GRB2,AR,ERBB2,PDGFRB,CAV1,EGFR	EGFR	KIT,PTK2,SHC1,GRB2,AR,ERBB2,PDGFRB,CAV1	0.430061	1.1235	6.09769
M195	9	5580,2316,7534,5879,8471,7532,3309,3303,3320	PRKCD,FLNA,YWHAZ,RAC1,IRS4,YWHAG,HSPA5,HSPA1A,HSP90AA1		PRKCD,FLNA,YWHAZ,RAC1,IRS4,YWHAG,HSPA5,HSPA1A,HSP90AA1	0.196718	0.428638	3.19207
M196	10	4035,5501,2886,5747,6464,2885,367,2064,857,1956	LRP1,PPP1CC,GRB7,PTK2,SHC1,GRB2,AR,ERBB2,CAV1,EGFR	EGFR	LRP1,PPP1CC,GRB7,PTK2,SHC1,GRB2,AR,ERBB2,CAV1	0.391391	1.07115	5.50624
M197	10	5501,2886,3815,5747,6464,2885,367,2064,857,1956	PPP1CC,GRB7,KIT,PTK2,SHC1,GRB2,AR,ERBB2,CAV1,EGFR	EGFR	PPP1CC,GRB7,KIT,PTK2,SHC1,GRB2,AR,ERBB2,CAV1	0.388749	1.0119	5.51047
M198	10	2260,999,7534,7532,3309,3303,3320,203068,351,1452	FGFR1,CDH1,YWHAZ,YWHAG,HSPA5,HSPA1A,HSP90AA1,TUBB,APP,CSNK1A1		FGFR1,CDH1,YWHAZ,YWHAG,HSPA5,HSPA1A,HSP90AA1,TUBB,APP,CSNK1A1	0.266759	0.505291	5.60714
M199	10	1994,5296,867,5295,5781,25,7529,8826,10971,1398	ELAVL1,PIK3R2,CBL,PIK3R1,PTPN11,ABL1,YWHAB,IQGAP1,YWHAQ,CRK		ELAVL1,PIK3R2,CBL,PIK3R1,PTPN11,ABL1,YWHAB,IQGAP1,YWHAQ,CRK	0.496965	0.468074	3.02421
M200	10	5296,867,5295,5781,25,7529,8826,10971,1398,10482	PIK3R2,CBL,PIK3R1,PTPN11,ABL1,YWHAB,IQGAP1,YWHAQ,CRK,NXF1		PIK3R2,CBL,PIK3R1,PTPN11,ABL1,YWHAB,IQGAP1,YWHAQ,CRK,NXF1	0.271549	0.399477	2.96825
M201	10	5296,867,5295,25,7529,8826,10971,1398,10482,7415	PIK3R2,CBL,PIK3R1,ABL1,YWHAB,IQGAP1,YWHAQ,CRK,NXF1,VCP		PIK3R2,CBL,PIK3R1,ABL1,YWHAB,IQGAP1,YWHAQ,CRK,NXF1,VCP	0.234688	0.39942	2.97402
M202	10	8945,4609,1499,64750,2932,6045,4790,3065,2146,5970	BTRC,MYC,CTNNB1,SMURF2,GSK3B,RNF2,NFKB1,HDAC1,EZH2,RELA	GSK3B,NFKB1,RELA	BTRC,MYC,CTNNB1,SMURF2,RNF2,HDAC1,EZH2	0.228635	1.04805	0.509315
M203	10	7189,4738,3192,10987,9820,2547,3551,8517,1660,8454	TRAF6,NEDD8,HNRNPU,COPS5,CUL7,XRCC6,IKBKB,IKBKG,DHX9,CUL1		TRAF6,NEDD8,HNRNPU,COPS5,CUL7,XRCC6,IKBKB,IKBKG,DHX9,CUL1	0.210744	0.187938	0.296745
M204	10	9820,2547,1660,8454,11337,55832,1017,3609,26270,6189	CUL7,XRCC6,DHX9,CUL1,GABARAP,CAND1,CDK2,ILF3,FBXO6,RPS3A	CDK2	CUL7,XRCC6,DHX9,CUL1,GABARAP,CAND1,ILF3,FBXO6,RPS3A	0.34204	0.21095	0.357593
M205	10	2547,8517,1660,8454,11337,55832,1017,3609,23710,26270	XRCC6,IKBKG,DHX9,CUL1,GABARAP,CAND1,CDK2,ILF3,GABARAPL1,FBXO6	CDK2	XRCC6,IKBKG,DHX9,CUL1,GABARAP,CAND1,ILF3,GABARAPL1,FBXO6	0.391794	0.216866	0.352588
M206	10	2547,1660,8454,11337,55832,1017,3609,23710,26270,6189	XRCC6,DHX9,CUL1,GABARAP,CAND1,CDK2,ILF3,GABARAPL1,FBXO6,RPS3A	CDK2	XRCC6,DHX9,CUL1,GABARAP,CAND1,ILF3,GABARAPL1,FBXO6,RPS3A	0.341236	0.207006	0.338347
M207	11	857,5499,3643,5594,4067,5580,3312,2886,6464,2885,1956	CAV1,PPP1CA,INSR,MAPK1,LYN,PRKCD,HSPA8,GRB7,SHC1,GRB2,EGFR	INSR,MAPK1,EGFR	CAV1,PPP1CA,LYN,PRKCD,HSPA8,GRB7,SHC1,GRB2	0.394336	1.69046	2.69731
M208	11	3312,4067,2316,7534,7532,857,2886,6464,2885,1956,5058	HSPA8,LYN,FLNA,YWHAZ,YWHAG,CAV1,GRB7,SHC1,GRB2,EGFR,PAK1	EGFR	HSPA8,LYN,FLNA,YWHAZ,YWHAG,CAV1,GRB7,SHC1,GRB2,PAK1	0.405778	1.07618	2.71622
M209	11	4087,5580,2316,7534,7532,3309,3303,3320,203068,351,1452	SMAD2,PRKCD,FLNA,YWHAZ,YWHAG,HSPA5,HSPA1A,HSP90AA1,TUBB,APP,CSNK1A1		SMAD2,PRKCD,FLNA,YWHAZ,YWHAG,HSPA5,HSPA1A,HSP90AA1,TUBB,APP,CSNK1A1	0.299428	0.494249	2.75033
M210	11	999,7534,7532,3309,3303,3320,203068,351,1452,22938,5062	CDH1,YWHAZ,YWHAG,HSPA5,HSPA1A,HSP90AA1,TUBB,APP,CSNK1A1,SNW1,PAK2		CDH1,YWHAZ,YWHAG,HSPA5,HSPA1A,HSP90AA1,TUBB,APP,CSNK1A1,SNW1,PAK2	0.250051	0.468208	5.10093
M211	11	6714,8452,4193,1994,5296,867,5295,25,7529,10971,1398	SRC,CUL3,MDM2,ELAVL1,PIK3R2,CBL,PIK3R1,ABL1,YWHAB,YWHAQ,CRK	SRC	CUL3,MDM2,ELAVL1,PIK3R2,CBL,PIK3R1,ABL1,YWHAB,YWHAQ,CRK	0.835264	0.53001	0.455817
M212	11	6749,7329,9612,7157,6597,3066,6613,2023,2908,3725,672	SSRP1,UBE2I,NCOR2,TP53,SMARCA4,HDAC2,SUMO2,ENO1,NR3C1,JUN,BRCA1	TP53,JUN	SSRP1,UBE2I,NCOR2,SMARCA4,HDAC2,SUMO2,ENO1,NR3C1,BRCA1	0.117673	0.331673	0.398598
M213	11	7329,9612,7157,6597,3066,6613,2023,2908,3725,672,2335	UBE2I,NCOR2,TP53,SMARCA4,HDAC2,SUMO2,ENO1,NR3C1,JUN,BRCA1,FN1	TP53,JUN	UBE2I,NCOR2,SMARCA4,HDAC2,SUMO2,ENO1,NR3C1,BRCA1,FN1	0.185095	0.386642	0.426636
M214	11	7157,6597,3066,6613,2023,2908,672,2335,9768,9611,3326	TP53,SMARCA4,HDAC2,SUMO2,ENO1,NR3C1,BRCA1,FN1,PCLAF,NCOR1,HSP90AB1	TP53	SMARCA4,HDAC2,SUMO2,ENO1,NR3C1,BRCA1,FN1,PCLAF,NCOR1,HSP90AB1	0.207344	0.365379	0.443233
M215	12	5291,834,2886,5747,6464,2885,367,857,1956,5058,5335,5594	PIK3CB,CASP1,GRB7,PTK2,SHC1,GRB2,AR,CAV1,EGFR,PAK1,PLCG1,MAPK1	EGFR,MAPK1	PIK3CB,CASP1,GRB7,PTK2,SHC1,GRB2,AR,CAV1,PAK1,PLCG1	0.382474	0.854239	2.5024
M216	12	4155,2886,6464,2885,367,857,1956,4869,5058,5335,5594,3312	MBP,GRB7,SHC1,GRB2,AR,CAV1,EGFR,NPM1,PAK1,PLCG1,MAPK1,HSPA8	EGFR,MAPK1	MBP,GRB7,SHC1,GRB2,AR,CAV1,NPM1,PAK1,PLCG1,HSPA8	0.290923	0.871747	2.48392
M217	12	3312,4067,4087,5580,7534,7532,3309,3303,3320,203068,351,1452	HSPA8,LYN,SMAD2,PRKCD,YWHAZ,YWHAG,HSPA5,HSPA1A,HSP90AA1,TUBB,APP,CSNK1A1		HSPA8,LYN,SMAD2,PRKCD,YWHAZ,YWHAG,HSPA5,HSPA1A,HSP90AA1,TUBB,APP,CSNK1A1	0.287275	0.495367	2.58409
M218	12	5580,2316,7534,7532,3309,3303,3320,203068,351,1452,22938,5062	PRKCD,FLNA,YWHAZ,YWHAG,HSPA5,HSPA1A,HSP90AA1,TUBB,APP,CSNK1A1,SNW1,PAK2		PRKCD,FLNA,YWHAZ,YWHAG,HSPA5,HSPA1A,HSP90AA1,TUBB,APP,CSNK1A1,SNW1,PAK2	0.276132	0.451269	2.52139
M219	12	4790,3065,2146,8841,23411,5970,1386,6667,5599,5925,1387,7341	NFKB1,HDAC1,EZH2,HDAC3,SIRT1,RELA,ATF2,SP1,MAPK8,RB1,CREBBP,SUMO1	NFKB1,RELA,MAPK8,RB1	HDAC1,EZH2,HDAC3,SIRT1,ATF2,SP1,CREBBP,SUMO1	0.249311	0.980513	0.45395
M220	13	5159,4690,5291,834,2886,5747,6464,2885,367,857,1956,5058,5335	PDGFRB,NCK1,PIK3CB,CASP1,GRB7,PTK2,SHC1,GRB2,AR,CAV1,EGFR,PAK1,PLCG1	EGFR	PDGFRB,NCK1,PIK3CB,CASP1,GRB7,PTK2,SHC1,GRB2,AR,CAV1,PAK1,PLCG1	0.406334	0.785048	2.31482
M221	13	5501,2886,5747,6464,2885,367,2064,857,1956,4869,801,5058,5335	PPP1CC,GRB7,PTK2,SHC1,GRB2,AR,ERBB2,CAV1,EGFR,NPM1,CALM1,PAK1,PLCG1	EGFR	PPP1CC,GRB7,PTK2,SHC1,GRB2,AR,ERBB2,CAV1,NPM1,CALM1,PAK1,PLCG1	0.324965	0.822936	4.3603
M222	13	6464,2885,367,2064,857,1956,4869,801,5058,5335,5594,3312,4067	SHC1,GRB2,AR,ERBB2,CAV1,EGFR,NPM1,CALM1,PAK1,PLCG1,MAPK1,HSPA8,LYN	EGFR,MAPK1	SHC1,GRB2,AR,ERBB2,CAV1,NPM1,CALM1,PAK1,PLCG1,HSPA8,LYN	0.370338	0.86695	4.39647
M223	13	6464,2885,367,2064,857,1956,4869,801,3643,5058,5335,5594,3312	SHC1,GRB2,AR,ERBB2,CAV1,EGFR,NPM1,CALM1,INSR,PAK1,PLCG1,MAPK1,HSPA8	EGFR,INSR,MAPK1	SHC1,GRB2,AR,ERBB2,CAV1,NPM1,CALM1,PAK1,PLCG1,HSPA8	0.332627	1.46602	4.34763
M224	13	5296,867,5295,25,10971,1398,10482,7415,3676,60,1915,7412,2521	PIK3R2,CBL,PIK3R1,ABL1,YWHAQ,CRK,NXF1,VCP,ITGA4,ACTB,EEF1A1,VCAM1,FUS		PIK3R2,CBL,PIK3R1,ABL1,YWHAQ,CRK,NXF1,VCP,ITGA4,ACTB,EEF1A1,VCAM1,FUS	2.56544	0.291716	0.391075
M225	14	2886,5747,6464,2885,367,2064,857,1956,4869,801,5058,5335,5594,3312	GRB7,PTK2,SHC1,GRB2,AR,ERBB2,CAV1,EGFR,NPM1,CALM1,PAK1,PLCG1,MAPK1,HSPA8	EGFR,MAPK1	GRB7,PTK2,SHC1,GRB2,AR,ERBB2,CAV1,NPM1,CALM1,PAK1,PLCG1,HSPA8	0.312285	0.805888	4.06514
M226	14	5747,6464,2885,367,2064,5159,857,1956,4869,801,3643,5058,5335,5594	PTK2,SHC1,GRB2,AR,ERBB2,PDGFRB,CAV1,EGFR,NPM1,CALM1,INSR,PAK1,PLCG1,MAPK1	EGFR,INSR,MAPK1	PTK2,SHC1,GRB2,AR,ERBB2,PDGFRB,CAV1,NPM1,CALM1,PAK1,PLCG1	0.305661	1.35792	4.06188
M227	15	2886,3815,5747,6464,2885,367,2064,857,1956,4869,801,3643,5058,5335,5594	GRB7,KIT,PTK2,SHC1,GRB2,AR,ERBB2,CAV1,EGFR,NPM1,CALM1,INSR,PAK1,PLCG1,MAPK1	EGFR,INSR,MAPK1	GRB7,KIT,PTK2,SHC1,GRB2,AR,ERBB2,CAV1,NPM1,CALM1,PAK1,PLCG1	0.286298	1.26911	3.79252
M228	15	7534,7532,3309,3303,3320,203068,351,1452,22938,5062,5894,7531,3313,2099,207	YWHAZ,YWHAG,HSPA5,HSPA1A,HSP90AA1,TUBB,APP,CSNK1A1,SNW1,PAK2,RAF1,YWHAE,HSPA9,ESR1,AKT1	ESR1,AKT1	YWHAZ,YWHAG,HSPA5,HSPA1A,HSP90AA1,TUBB,APP,CSNK1A1,SNW1,PAK2,RAF1,YWHAE,HSPA9	0.227737	0.430439	2.08642
M229	15	3065,8841,23411,8726,5970,1026,6667,6908,5599,5925,1387,7341,2033,3091,7329	HDAC1,HDAC3,SIRT1,EED,RELA,CDKN1A,SP1,TBP,MAPK8,RB1,CREBBP,SUMO1,EP300,HIF1A,UBE2I	RELA,MAPK8,RB1,HIF1A	HDAC1,HDAC3,SIRT1,EED,CDKN1A,SP1,TBP,CREBBP,SUMO1,EP300,UBE2I	0.248757	0.858746	0.409105
M230	15	10399,10492,3192,10987,708,9820,2547,8517,1660,8454,11337,8453,55832,1017,3609	RACK1,SYNCRIP,HNRNPU,COPS5,C1QBP,CUL7,XRCC6,IKBKG,DHX9,CUL1,GABARAP,CUL2,CAND1,CDK2,ILF3	CDK2	RACK1,SYNCRIP,HNRNPU,COPS5,C1QBP,CUL7,XRCC6,IKBKG,DHX9,CUL1,GABARAP,CUL2,CAND1,ILF3	0.167306	0.152029	0.275525
M231	16	4087,5580,7534,7532,3309,3303,3320,203068,351,1452,5062,5894,7531,3313,2099,207	SMAD2,PRKCD,YWHAZ,YWHAG,HSPA5,HSPA1A,HSP90AA1,TUBB,APP,CSNK1A1,PAK2,RAF1,YWHAE,HSPA9,ESR1,AKT1	ESR1,AKT1	SMAD2,PRKCD,YWHAZ,YWHAG,HSPA5,HSPA1A,HSP90AA1,TUBB,APP,CSNK1A1,PAK2,RAF1,YWHAE,HSPA9	0.245838	0.417184	1.97442
M232	16	5580,7534,7532,3309,3303,3320,203068,351,1452,5062,5894,7531,3313,2099,207,1742	PRKCD,YWHAZ,YWHAG,HSPA5,HSPA1A,HSP90AA1,TUBB,APP,CSNK1A1,PAK2,RAF1,YWHAE,HSPA9,ESR1,AKT1,DLG4	ESR1,AKT1	PRKCD,YWHAZ,YWHAG,HSPA5,HSPA1A,HSP90AA1,TUBB,APP,CSNK1A1,PAK2,RAF1,YWHAE,HSPA9,DLG4	0.291112	0.410684	1.98246
M233	16	3308,4790,3065,8841,23411,5970,1026,1386,6667,5599,5925,1387,7341,2033,3091,7329	HSPA4,NFKB1,HDAC1,HDAC3,SIRT1,RELA,CDKN1A,ATF2,SP1,MAPK8,RB1,CREBBP,SUMO1,EP300,HIF1A,UBE2I	NFKB1,RELA,MAPK8,RB1,HIF1A	HSPA4,HDAC1,HDAC3,SIRT1,CDKN1A,ATF2,SP1,CREBBP,SUMO1,EP300,UBE2I	0.223814	0.855523	0.398353
M234	16	4790,3065,8841,23411,5970,1026,1386,6667,5599,5925,1387,7341,2033,3091,7329,5111	NFKB1,HDAC1,HDAC3,SIRT1,RELA,CDKN1A,ATF2,SP1,MAPK8,RB1,CREBBP,SUMO1,EP300,HIF1A,UBE2I,PCNA	NFKB1,RELA,MAPK8,RB1,HIF1A	HDAC1,HDAC3,SIRT1,CDKN1A,ATF2,SP1,CREBBP,SUMO1,EP300,UBE2I,PCNA	0.212803	0.875144	0.42274
M235	16	5925,1387,7341,2033,3091,7329,1487,5111,7431,9612,8607,7157,6597,3066,5468,6613	RB1,CREBBP,SUMO1,EP300,HIF1A,UBE2I,CTBP1,PCNA,VIM,NCOR2,RUVBL1,TP53,SMARCA4,HDAC2,PPARG,SUMO2	RB1,HIF1A,TP53,PPARG	CREBBP,SUMO1,EP300,UBE2I,CTBP1,PCNA,VIM,NCOR2,RUVBL1,SMARCA4,HDAC2,SUMO2	0.149512	0.407471	0.329294
M236	16	6667,6908,5599,5925,1387,7341,2033,3091,7329,1487,5111,9612,1029,8607,7157,6597	SP1,TBP,MAPK8,RB1,CREBBP,SUMO1,EP300,HIF1A,UBE2I,CTBP1,PCNA,NCOR2,CDKN2A,RUVBL1,TP53,SMARCA4	MAPK8,RB1,HIF1A,TP53	SP1,TBP,CREBBP,SUMO1,EP300,UBE2I,CTBP1,PCNA,NCOR2,CDKN2A,RUVBL1,SMARCA4	0.143976	0.347811	0.318728
M237	16	10273,3837,5925,1387,7341,2033,3091,7329,1487,5111,9612,7157,6597,3066,5468,6613	STUB1,KPNB1,RB1,CREBBP,SUMO1,EP300,HIF1A,UBE2I,CTBP1,PCNA,NCOR2,TP53,SMARCA4,HDAC2,PPARG,SUMO2	RB1,HIF1A,TP53,PPARG	STUB1,KPNB1,CREBBP,SUMO1,EP300,UBE2I,CTBP1,PCNA,NCOR2,SMARCA4,HDAC2,SUMO2	0.150843	0.415843	0.343959
M238	17	834,2886,5747,6464,2885,367,857,1956,5058,5335,5594,3312,5580,7534,3309,3303,3320	CASP1,GRB7,PTK2,SHC1,GRB2,AR,CAV1,EGFR,PAK1,PLCG1,MAPK1,HSPA8,PRKCD,YWHAZ,HSPA5,HSPA1A,HSP90AA1	EGFR,MAPK1	CASP1,GRB7,PTK2,SHC1,GRB2,AR,CAV1,PAK1,PLCG1,HSPA8,PRKCD,YWHAZ,HSPA5,HSPA1A,HSP90AA1	0.341365	0.7823	3.41818
M239	17	23028,4790,3065,8841,23411,5970,1026,6667,6908,5599,5925,1387,7341,2033,3091,7329,1487	KDM1A,NFKB1,HDAC1,HDAC3,SIRT1,RELA,CDKN1A,SP1,TBP,MAPK8,RB1,CREBBP,SUMO1,EP300,HIF1A,UBE2I,CTBP1	NFKB1,RELA,MAPK8,RB1,HIF1A	KDM1A,HDAC1,HDAC3,SIRT1,CDKN1A,SP1,TBP,CREBBP,SUMO1,EP300,UBE2I,CTBP1	0.198765	0.7857	0.371118
M240	17	4790,3065,8841,23411,5970,1026,6667,6908,5599,5925,1387,7341,2033,3091,7329,1487,5111	NFKB1,HDAC1,HDAC3,SIRT1,RELA,CDKN1A,SP1,TBP,MAPK8,RB1,CREBBP,SUMO1,EP300,HIF1A,UBE2I,CTBP1,PCNA	NFKB1,RELA,MAPK8,RB1,HIF1A	HDAC1,HDAC3,SIRT1,CDKN1A,SP1,TBP,CREBBP,SUMO1,EP300,UBE2I,CTBP1,PCNA	0.199204	0.816446	0.401002
M241	17	5925,1387,7341,2033,3091,7329,1487,5111,9612,1029,8607,7157,6597,3066,5468,6613,5914	RB1,CREBBP,SUMO1,EP300,HIF1A,UBE2I,CTBP1,PCNA,NCOR2,CDKN2A,RUVBL1,TP53,SMARCA4,HDAC2,PPARG,SUMO2,RARA	RB1,HIF1A,TP53,PPARG	CREBBP,SUMO1,EP300,UBE2I,CTBP1,PCNA,NCOR2,CDKN2A,RUVBL1,SMARCA4,HDAC2,SUMO2,RARA	0.141014	0.382844	0.319491
M242	17	5970,1026,1386,6667,6908,5599,5925,1387,7341,2033,3091,7329,1487,5111,9612,1029,7157	RELA,CDKN1A,ATF2,SP1,TBP,MAPK8,RB1,CREBBP,SUMO1,EP300,HIF1A,UBE2I,CTBP1,PCNA,NCOR2,CDKN2A,TP53	RELA,MAPK8,RB1,HIF1A,TP53	CDKN1A,ATF2,SP1,TBP,CREBBP,SUMO1,EP300,UBE2I,CTBP1,PCNA,NCOR2,CDKN2A	0.192202	0.357753	0.397667
M243	18	2886,5747,6464,2885,367,857,1956,5058,5335,5594,3312,5580,7534,3309,3303,3320,203068,351	GRB7,PTK2,SHC1,GRB2,AR,CAV1,EGFR,PAK1,PLCG1,MAPK1,HSPA8,PRKCD,YWHAZ,HSPA5,HSPA1A,HSP90AA1,TUBB,APP	EGFR,MAPK1	GRB7,PTK2,SHC1,GRB2,AR,CAV1,PAK1,PLCG1,HSPA8,PRKCD,YWHAZ,HSPA5,HSPA1A,HSP90AA1,TUBB,APP	0.334097	0.827044	3.28147
M244	18	3065,8841,23411,5970,1026,1386,6667,5599,5925,1387,7341,2033,3091,7329,5111,7431,8607,7157	HDAC1,HDAC3,SIRT1,RELA,CDKN1A,ATF2,SP1,MAPK8,RB1,CREBBP,SUMO1,EP300,HIF1A,UBE2I,PCNA,VIM,RUVBL1,TP53	RELA,MAPK8,RB1,HIF1A,TP53	HDAC1,HDAC3,SIRT1,CDKN1A,ATF2,SP1,CREBBP,SUMO1,EP300,UBE2I,PCNA,VIM,RUVBL1	0.204708	0.800362	0.415617
M245	18	1026,1386,6667,6908,5599,5925,1387,7341,2033,3091,7329,1487,5111,9612,1029,7157,6597,3066	CDKN1A,ATF2,SP1,TBP,MAPK8,RB1,CREBBP,SUMO1,EP300,HIF1A,UBE2I,CTBP1,PCNA,NCOR2,CDKN2A,TP53,SMARCA4,HDAC2	MAPK8,RB1,HIF1A,TP53	CDKN1A,ATF2,SP1,TBP,CREBBP,SUMO1,EP300,UBE2I,CTBP1,PCNA,NCOR2,CDKN2A,SMARCA4,HDAC2	0.131763	0.350728	0.298243
M246	19	1386,6667,6908,5599,5925,1387,7341,2033,3091,7329,1487,5111,9612,1029,7157,6597,3066,5468,6613	ATF2,SP1,TBP,MAPK8,RB1,CREBBP,SUMO1,EP300,HIF1A,UBE2I,CTBP1,PCNA,NCOR2,CDKN2A,TP53,SMARCA4,HDAC2,PPARG,SUMO2	MAPK8,RB1,HIF1A,TP53,PPARG	ATF2,SP1,TBP,CREBBP,SUMO1,EP300,UBE2I,CTBP1,PCNA,NCOR2,CDKN2A,SMARCA4,HDAC2,SUMO2	0.149883	0.372919	0.339935
M247	19	6667,6908,5599,5925,1387,7341,2033,3091,7329,1487,5111,9612,1029,7157,6597,3066,5468,6613,1107	SP1,TBP,MAPK8,RB1,CREBBP,SUMO1,EP300,HIF1A,UBE2I,CTBP1,PCNA,NCOR2,CDKN2A,TP53,SMARCA4,HDAC2,PPARG,SUMO2,CHD3	MAPK8,RB1,HIF1A,TP53,PPARG	SP1,TBP,CREBBP,SUMO1,EP300,UBE2I,CTBP1,PCNA,NCOR2,CDKN2A,SMARCA4,HDAC2,SUMO2,CHD3	0.148544	0.360014	0.338534
M248	19	6667,6908,5599,5925,1387,7341,2033,3091,7329,1487,5111,9612,1029,7157,6597,3066,5468,6613,5914	SP1,TBP,MAPK8,RB1,CREBBP,SUMO1,EP300,HIF1A,UBE2I,CTBP1,PCNA,NCOR2,CDKN2A,TP53,SMARCA4,HDAC2,PPARG,SUMO2,RARA	MAPK8,RB1,HIF1A,TP53,PPARG	SP1,TBP,CREBBP,SUMO1,EP300,UBE2I,CTBP1,PCNA,NCOR2,CDKN2A,SMARCA4,HDAC2,SUMO2,RARA	0.149137	0.362073	0.340236
M249	20	6464,2885,367,2064,857,1956,4869,801,5058,5335,5594,3312,5580,7534,7532,3309,3303,3320,203068,351	SHC1,GRB2,AR,ERBB2,CAV1,EGFR,NPM1,CALM1,PAK1,PLCG1,MAPK1,HSPA8,PRKCD,YWHAZ,YWHAG,HSPA5,HSPA1A,HSP90AA1,TUBB,APP	EGFR,MAPK1	SHC1,GRB2,AR,ERBB2,CAV1,NPM1,CALM1,PAK1,PLCG1,HSPA8,PRKCD,YWHAZ,YWHAG,HSPA5,HSPA1A,HSP90AA1,TUBB,APP	0.348282	0.803785	4.31507
M250	20	3065,8841,23411,5970,1026,6667,6908,5599,5925,1387,7341,2033,3091,7329,1487,5111,7431,9612,8607,7157	HDAC1,HDAC3,SIRT1,RELA,CDKN1A,SP1,TBP,MAPK8,RB1,CREBBP,SUMO1,EP300,HIF1A,UBE2I,CTBP1,PCNA,VIM,NCOR2,RUVBL1,TP53	RELA,MAPK8,RB1,HIF1A,TP53	HDAC1,HDAC3,SIRT1,CDKN1A,SP1,TBP,CREBBP,SUMO1,EP300,UBE2I,CTBP1,PCNA,VIM,NCOR2,RUVBL1	0.18472	0.72165	0.377929
M251	20	3837,5925,1387,7341,2033,3091,7329,1487,5111,9612,7157,6597,3066,5468,6613,5914,2023,2908,3725,672	KPNB1,RB1,CREBBP,SUMO1,EP300,HIF1A,UBE2I,CTBP1,PCNA,NCOR2,TP53,SMARCA4,HDAC2,PPARG,SUMO2,RARA,ENO1,NR3C1,JUN,BRCA1	RB1,HIF1A,TP53,PPARG,JUN	KPNB1,CREBBP,SUMO1,EP300,UBE2I,CTBP1,PCNA,NCOR2,SMARCA4,HDAC2,SUMO2,RARA,ENO1,NR3C1,BRCA1	0.130557	0.378913	0.34391
M252	21	5925,1387,7341,2033,3091,7329,1487,5111,9612,1029,7157,6597,3066,5468,6613,1107,5914,2023,2908,3725,672	RB1,CREBBP,SUMO1,EP300,HIF1A,UBE2I,CTBP1,PCNA,NCOR2,CDKN2A,TP53,SMARCA4,HDAC2,PPARG,SUMO2,CHD3,RARA,ENO1,NR3C1,JUN,BRCA1	RB1,HIF1A,TP53,PPARG,JUN	CREBBP,SUMO1,EP300,UBE2I,CTBP1,PCNA,NCOR2,CDKN2A,SMARCA4,HDAC2,SUMO2,CHD3,RARA,ENO1,NR3C1,BRCA1	0.122711	0.363907	0.332883
M253	21	5925,1387,7341,2033,3091,7329,1487,5111,9612,1029,7157,6597,3066,5468,6613,5914,2023,2908,3725,672,10856	RB1,CREBBP,SUMO1,EP300,HIF1A,UBE2I,CTBP1,PCNA,NCOR2,CDKN2A,TP53,SMARCA4,HDAC2,PPARG,SUMO2,RARA,ENO1,NR3C1,JUN,BRCA1,RUVBL2	RB1,HIF1A,TP53,PPARG,JUN	CREBBP,SUMO1,EP300,UBE2I,CTBP1,PCNA,NCOR2,CDKN2A,SMARCA4,HDAC2,SUMO2,RARA,ENO1,NR3C1,BRCA1,RUVBL2	0.128849	0.367391	0.33402
M254	22	2886,6464,2885,367,857,1956,4869,5058,5335,5594,3312,5580,7534,7532,3309,3303,3320,203068,351,1452,5894,7531	GRB7,SHC1,GRB2,AR,CAV1,EGFR,NPM1,PAK1,PLCG1,MAPK1,HSPA8,PRKCD,YWHAZ,YWHAG,HSPA5,HSPA1A,HSP90AA1,TUBB,APP,CSNK1A1,RAF1,YWHAE	EGFR,MAPK1	GRB7,SHC1,GRB2,AR,CAV1,NPM1,PAK1,PLCG1,HSPA8,PRKCD,YWHAZ,YWHAG,HSPA5,HSPA1A,HSP90AA1,TUBB,APP,CSNK1A1,RAF1,YWHAE	0.28709	0.722041	2.73213
M255	22	857,1956,4869,801,5058,5335,5594,3312,5580,7534,7532,3309,3303,3320,203068,351,1452,5894,7531,3313,2099,207	CAV1,EGFR,NPM1,CALM1,PAK1,PLCG1,MAPK1,HSPA8,PRKCD,YWHAZ,YWHAG,HSPA5,HSPA1A,HSP90AA1,TUBB,APP,CSNK1A1,RAF1,YWHAE,HSPA9,ESR1,AKT1	EGFR,MAPK1,ESR1,AKT1	CAV1,NPM1,CALM1,PAK1,PLCG1,HSPA8,PRKCD,YWHAZ,YWHAG,HSPA5,HSPA1A,HSP90AA1,TUBB,APP,CSNK1A1,RAF1,YWHAE,HSPA9	0.279889	0.744424	2.74212
M256	22	1386,6667,6908,5925,1387,7341,2033,3091,7329,1487,5111,9612,7157,6597,3066,5468,6613,5914,2023,2908,3725,672	ATF2,SP1,TBP,RB1,CREBBP,SUMO1,EP300,HIF1A,UBE2I,CTBP1,PCNA,NCOR2,TP53,SMARCA4,HDAC2,PPARG,SUMO2,RARA,ENO1,NR3C1,JUN,BRCA1	RB1,HIF1A,TP53,PPARG,JUN	ATF2,SP1,TBP,CREBBP,SUMO1,EP300,UBE2I,CTBP1,PCNA,NCOR2,SMARCA4,HDAC2,SUMO2,RARA,ENO1,NR3C1,BRCA1	0.138801	0.367485	0.354347
M257	22	6667,6908,5925,1387,7341,2033,3091,7329,1487,5111,9612,7157,6597,3066,5468,6613,5914,2023,2908,3725,672,10856	SP1,TBP,RB1,CREBBP,SUMO1,EP300,HIF1A,UBE2I,CTBP1,PCNA,NCOR2,TP53,SMARCA4,HDAC2,PPARG,SUMO2,RARA,ENO1,NR3C1,JUN,BRCA1,RUVBL2	RB1,HIF1A,TP53,PPARG,JUN	SP1,TBP,CREBBP,SUMO1,EP300,UBE2I,CTBP1,PCNA,NCOR2,SMARCA4,HDAC2,SUMO2,RARA,ENO1,NR3C1,BRCA1,RUVBL2	0.143504	0.359665	0.354221

## Sheet: Table S9
Table S9 The targets of BXXXT herbs
Herb	Core genes	Common genes with colitis
BX	ACHE,TNF,JUN,RELA,TYR,BAX,BCL2,CASP3,CASP9,INS,MMP9,NFKBIA,PTGS2,ABCA1,BCHE,BHMT,CTSC,CSN1S1,CYP2D6,CYP3A4,GSK3B,HPD,HTR1A,MMP1,MYC,ODC1,OXT,SLC25A3,POLB,PON1	TNF;MMP9
GJ	PTGS2,HTR1A,KCNH1,TNF,BCL2,CYP2B6,ALDH1A3,BAX,CASP3,CASP9,CYP3A4,NOS2,TRPV1,VAMP3,ZRANB2,TRPM8,ACHE,AKR1B1,ALPL,CCND1,CYP2D6,FDPS,HMGCR,IL4,IL6,NFKBIA,PPARG,RELA,CCL2,TP53	TNF;ALPL;IL6
HL	CYP3A4,ESR1,ACHE,MAOA,MAPT,TNF,ALOX15,CCND1,CA2,COL2A1,CYP1A1,CYP1A2,HMOX1,HTR1A,MPO,OGN,MAPK1,PTGS2,RAC1,TH,TYR,VEGFA,PFBI,ADIPOQ,ADORA1,ADORA2A,ADORA3,PARP1,ADRA1D,ADRA1B	TNF
HQ	BCL2,CASP3,ACHE,CYP1A2,CYP1B1,CYP3A4,JUN,NOS1,NOS2,XDH,AKT1,BAX,CASP9,CYP1A1,CYP2C9,CYP2D6,FLT3,GSK3B,HTR7,ABCC1,PTGS2,RELA,SREBF2,TNF,TP53,TYR,ABCG5,ABCG8,ABCA1,CCND1	TNF
RS	ABCA1,INS,SREBF2,TYR,ABCG5,ABCG8,ACO2,APOA1,CASP3,CAT,CSN1S1,CYP3A4,FH,GSK3B,HIF1A,HMGCR,MDH1,MDH2,POLB,PPARG,SDHB,SLC13A2,PAICS,ACHE,ACLY,ACO1,ADORA1,ALB,ALOX5,ANG	ALOX5
DZ	PTGS2,ACHE,CASP3,CYP3A4,NOS3,CYP19A1,INS,PPARG,TOP2A,GPBAR1,ADRA2C,BDKRB2,CAT,CEL,COMT,MAPK14,CYB5A,CYP1A2,CYP2C19,CYP2D6,DECR1,NQO1,DRD2,DRD3,DRD4,EGFR,FASN,FOS,GCG,HMGCR
RGC	PPARG,CYP3A4,CYP19A1,CYP1B1,JUN,UGT1A10,UGT1A8,UGT1A7,UGT1A9,CASP3,CYP1A1,CYP1A2,CYP2C19,CYP2C9,ESR1,ESR2,ICAM1,NEU2,RELA,AKT1,AKR1B1,BAX,CCND1,BCL2,CDK2,DECR1,FOS,GJA1,LCK,MAPT	ICAM1
